# Supplementary material for: Three-component stereoselective synthesis of spirooxindole derivatives
Source: Royal Society of Chemistry journal article supplement (doi:10.1039/c2gc36552a), 2012-11-21
Supplement: c2gc36552a.pdf [file c2gc36552a.pdf]

# Novel Three-Component Stereoselective Synthesis of Spirooxindole Derivatives

Fuchao Yu,<sup>a</sup> Rong Huang,<sup>a</sup> Hangchen Ni,<sup>a</sup> Juan Fan,<sup>a</sup> Shengjiao Yan\*<sup>a</sup>  
and Jun Lin\*<sup>a,b</sup>

<sup>a</sup> Key Laboratory of Medicinal Chemistry for Natural Resources (Yunnan University),  
Ministry of Education, School of Chemical Science and Technology, Yunnan  
University, Kunming, 650091, P. R. China

<sup>b</sup> State Key Laboratory of Elemento-organic Chemistry, Nankai University,  
Tianjin, 300071, P. R. China

## Supporting Information

### Table of Contents

|                                                                                                                                       |    |
|---------------------------------------------------------------------------------------------------------------------------------------|----|
| General Information.....                                                                                                              | 4  |
| General Procedure for the Preparation of Spirooxindole Derivatives <b>5</b> and <b>5'</b> .....                                       | 4  |
| Spectroscopic Data of Spirooxindole Derivatives <b>5</b> and <b>5'</b> .....                                                          | 5  |
| X-ray Structure and Data of <b>5r</b> .....                                                                                           | 23 |
| X-ray Structure and Data of <b>5r'</b> .....                                                                                          | 30 |
| <b>Figure 1.</b> <sup>1</sup> H NMR (500 MHz, DMSO- <i>d</i> <sub>6</sub> ) spectra of compound <b>5a</b> .....                       | 37 |
| <b>Figure 2.</b> <sup>13</sup> C NMR (125 MHz, DMSO- <i>d</i> <sub>6</sub> ) spectra of compound <b>5a</b> .....                      | 38 |
| <b>Figure 3.</b> <sup>1</sup> H NMR (500 MHz, DMSO- <i>d</i> <sub>6</sub> ) spectra of compound <b>5b</b> .....                       | 39 |
| <b>Figure 4.</b> <sup>13</sup> C NMR (125 MHz, DMSO- <i>d</i> <sub>6</sub> ) spectra of compound <b>5b</b> .....                      | 40 |
| <b>Figure 5.</b> <sup>1</sup> H NMR (500 MHz, DMSO- <i>d</i> <sub>6</sub> ) spectra of compound <b>5c</b> .....                       | 41 |
| <b>Figure 6.</b> <sup>13</sup> C NMR (125 MHz, DMSO- <i>d</i> <sub>6</sub> ) spectra of compound <b>5c</b> .....                      | 42 |
| <b>Figure 7.</b> <sup>1</sup> H NMR (500 MHz, DMSO- <i>d</i> <sub>6</sub> ) spectra of compound <b>5d</b> .....                       | 43 |
| <b>Figure 8.</b> <sup>13</sup> C NMR (125 MHz, DMSO- <i>d</i> <sub>6</sub> ) spectra of compound <b>5d</b> .....                      | 44 |
| <b>Figure 9.</b> <sup>1</sup> H NMR (500 MHz, DMSO- <i>d</i> <sub>6</sub> + HClO <sub>4</sub> ) spectra of compound <b>5e</b> .....   | 45 |
| <b>Figure 10.</b> <sup>13</sup> C NMR (125 MHz, DMSO- <i>d</i> <sub>6</sub> + HClO <sub>4</sub> ) spectra of compound <b>5e</b> ..... | 46 |
| <b>Figure 11.</b> <sup>1</sup> H NMR (500 MHz, DMSO- <i>d</i> <sub>6</sub> ) spectra of compound <b>5f</b> .....                      | 47 |
| <b>Figure 12.</b> <sup>13</sup> C NMR (125 MHz, DMSO- <i>d</i> <sub>6</sub> ) spectra of compound <b>5f</b> .....                     | 48 |
| <b>Figure 13.</b> <sup>1</sup> H NMR (500 MHz, CDCl <sub>3</sub> + DMSO- <i>d</i> <sub>6</sub> ) spectra of compound <b>5g</b> .....  | 49 |
| <b>Figure 14.</b> <sup>13</sup> C NMR (125 MHz, CDCl <sub>3</sub> + DMSO- <i>d</i> <sub>6</sub> ) spectra of compound <b>5g</b> ..... | 50 |
| <b>Figure 15.</b> <sup>1</sup> H NMR (500 MHz, CDCl <sub>3</sub> + DMSO- <i>d</i> <sub>6</sub> ) spectra of compound <b>5h</b> .....  | 51 |

|                   |                                                                                                        |    |
|-------------------|--------------------------------------------------------------------------------------------------------|----|
| <b>Figure 16.</b> | $^{13}\text{C}$ NMR (125 MHz, $\text{CDCl}_3 + \text{DMSO-}d_6$ ) spectra of compound <b>5h</b> .....  | 52 |
| <b>Figure 17.</b> | $^1\text{H}$ NMR (500 MHz, $\text{DMSO-}d_6$ ) spectra of compound <b>5i</b> .....                     | 53 |
| <b>Figure 18.</b> | $^{13}\text{C}$ NMR (125 MHz, $\text{DMSO-}d_6$ ) spectra of compound <b>5i</b> .....                  | 54 |
| <b>Figure 19.</b> | $^1\text{H}$ NMR (500 MHz, $\text{DMSO-}d_6$ ) spectra of compound <b>5j</b> .....                     | 55 |
| <b>Figure 20.</b> | $^{13}\text{C}$ NMR (125 MHz, $\text{DMSO-}d_6$ ) spectra of compound <b>5j</b> .....                  | 56 |
| <b>Figure 21.</b> | $^1\text{H}$ NMR (500 MHz, $\text{DMSO-}d_6$ ) spectra of compound <b>5k</b> .....                     | 57 |
| <b>Figure 22.</b> | $^{13}\text{C}$ NMR (125 MHz, $\text{DMSO-}d_6$ ) spectra of compound <b>5k</b> .....                  | 58 |
| <b>Figure 23.</b> | $^1\text{H}$ NMR (500 MHz, $\text{DMSO-}d_6$ ) spectra of compound <b>5l</b> .....                     | 59 |
| <b>Figure 24.</b> | $^{13}\text{C}$ NMR (125 MHz, $\text{DMSO-}d_6$ ) spectra of compound <b>5l</b> .....                  | 60 |
| <b>Figure 25.</b> | $^1\text{H}$ NMR (500 MHz, $\text{DMSO-}d_6$ ) spectra of compound <b>5m</b> .....                     | 61 |
| <b>Figure 26.</b> | $^{13}\text{C}$ NMR (125 MHz, $\text{DMSO-}d_6$ ) spectra of compound <b>5m</b> .....                  | 62 |
| <b>Figure 27.</b> | $^1\text{H}$ NMR (500 MHz, $\text{DMSO-}d_6$ ) spectra of compound <b>5m'</b> .....                    | 63 |
| <b>Figure 28.</b> | $^{13}\text{C}$ NMR (125 MHz, $\text{DMSO-}d_6$ ) spectra of compound <b>5m'</b> .....                 | 64 |
| <b>Figure 29.</b> | $^1\text{H}$ NMR (500 MHz, $\text{DMSO-}d_6$ ) spectra of compound <b>5n</b> .....                     | 65 |
| <b>Figure 30.</b> | $^{13}\text{C}$ NMR (125 MHz, $\text{DMSO-}d_6$ ) spectra of compound <b>5n</b> .....                  | 66 |
| <b>Figure 31.</b> | $^1\text{H}$ NMR (500 MHz, $\text{DMSO-}d_6$ ) spectra of compound <b>5n'</b> .....                    | 67 |
| <b>Figure 32.</b> | $^{13}\text{C}$ NMR (125 MHz, $\text{DMSO-}d_6$ ) spectra of compound <b>5n'</b> .....                 | 68 |
| <b>Figure 33.</b> | $^1\text{H}$ NMR (500 MHz, $\text{DMSO-}d_6 + \text{HClO}_4$ ) spectra of compound <b>5o</b> .....     | 69 |
| <b>Figure 34.</b> | $^{13}\text{C}$ NMR (125 MHz, $\text{DMSO-}d_6 + \text{HClO}_4$ ) spectra of compound <b>5o</b> .....  | 70 |
| <b>Figure 35.</b> | $^1\text{H}$ NMR (500 MHz, $\text{DMSO-}d_6$ ) spectra of compound <b>5o'</b> .....                    | 71 |
| <b>Figure 36.</b> | $^{13}\text{C}$ NMR (125 MHz, $\text{DMSO-}d_6$ ) spectra of compound <b>5o'</b> .....                 | 72 |
| <b>Figure 37.</b> | $^1\text{H}$ NMR (500 MHz, $\text{DMSO-}d_6$ ) spectra of compound <b>5p</b> .....                     | 73 |
| <b>Figure 38.</b> | $^{13}\text{C}$ NMR (125 MHz, $\text{DMSO-}d_6$ ) spectra of compound <b>5p</b> .....                  | 74 |
| <b>Figure 39.</b> | $^1\text{H}$ NMR (500 MHz, $\text{DMSO-}d_6$ ) spectra of compound <b>5p'</b> .....                    | 75 |
| <b>Figure 40.</b> | $^{13}\text{C}$ NMR (125 MHz, $\text{DMSO-}d_6$ ) spectra of compound <b>5p'</b> .....                 | 76 |
| <b>Figure 41.</b> | $^1\text{H}$ NMR (500 MHz, $\text{DMSO-}d_6$ ) spectra of compound <b>5q</b> .....                     | 77 |
| <b>Figure 42.</b> | $^{13}\text{C}$ NMR (125 MHz, $\text{DMSO-}d_6$ ) spectra of compound <b>5q</b> .....                  | 78 |
| <b>Figure 43.</b> | $^1\text{H}$ NMR (500 MHz, $\text{DMSO-}d_6$ ) spectra of compound <b>5q'</b> .....                    | 79 |
| <b>Figure 44.</b> | $^{13}\text{C}$ NMR (125 MHz, $\text{DMSO-}d_6$ ) spectra of compound <b>5q'</b> .....                 | 80 |
| <b>Figure 45.</b> | $^1\text{H}$ NMR (500 MHz, $\text{CDCl}_3 + \text{DMSO-}d_6$ ) spectra of compound <b>5r</b> .....     | 81 |
| <b>Figure 46.</b> | $^{13}\text{C}$ NMR (125 MHz, $\text{CDCl}_3 + \text{DMSO-}d_6$ ) spectra of compound <b>5r</b> .....  | 82 |
| <b>Figure 47.</b> | $^1\text{H}$ NMR (500 MHz, $\text{CDCl}_3 + \text{DMSO-}d_6$ ) spectra of compound <b>5r'</b> .....    | 83 |
| <b>Figure 48.</b> | $^{13}\text{C}$ NMR (125 MHz, $\text{CDCl}_3 + \text{DMSO-}d_6$ ) spectra of compound <b>5r'</b> ..... | 84 |
| <b>Figure 49.</b> | $^1\text{H}$ NMR (500 MHz, $\text{DMSO-}d_6$ ) spectra of compound <b>5s</b> .....                     | 85 |
| <b>Figure 50.</b> | $^{13}\text{C}$ NMR (125 MHz, $\text{DMSO-}d_6$ ) spectra of compound <b>5s</b> .....                  | 86 |

|                                   |                                                                                        |     |
|-----------------------------------|----------------------------------------------------------------------------------------|-----|
| <b>Figure 51.</b>                 | $^1\text{H}$ NMR (500 MHz, $\text{DMSO-}d_6$ ) spectra of compound <b>5s'</b> .....    | 87  |
| <b>Figure 52.</b>                 | $^{13}\text{C}$ NMR (125 MHz, $\text{DMSO-}d_6$ ) spectra of compound <b>5s'</b> ..... | 88  |
| <b>Figure 53.</b>                 | $^1\text{H}$ NMR (500 MHz, $\text{DMSO-}d_6$ ) spectra of compound <b>5t</b> .....     | 89  |
| <b>Figure 54.</b>                 | $^{13}\text{C}$ NMR (125 MHz, $\text{DMSO-}d_6$ ) spectra of compound <b>5t</b> .....  | 90  |
| <b>Figure 55.</b>                 | $^1\text{H}$ NMR (500 MHz, $\text{DMSO-}d_6$ ) spectra of compound <b>5t'</b> .....    | 91  |
| <b>Figure 56.</b>                 | $^{13}\text{C}$ NMR (125 MHz, $\text{DMSO-}d_6$ ) spectra of compound <b>5t'</b> ..... | 92  |
| <b>Figure 57.</b>                 | $^1\text{H}$ NMR (500 MHz, $\text{DMSO-}d_6$ ) spectra of compound <b>5u</b> .....     | 93  |
| <b>Figure 58.</b>                 | $^{13}\text{C}$ NMR (125 MHz, $\text{DMSO-}d_6$ ) spectra of compound <b>5u</b> .....  | 94  |
| <b>Figure 59.</b>                 | $^1\text{H}$ NMR (500 MHz, $\text{DMSO-}d_6$ ) spectra of compound <b>5u'</b> .....    | 95  |
| <b>Figure 60.</b>                 | $^{13}\text{C}$ NMR (125 MHz, $\text{DMSO-}d_6$ ) spectra of compound <b>5u'</b> ..... | 96  |
| <b>Figure 61.</b>                 | $^1\text{H}$ NMR (500 MHz, $\text{DMSO-}d_6$ ) spectra of compound <b>5v</b> .....     | 97  |
| <b>Figure 62.</b>                 | $^{13}\text{C}$ NMR (125 MHz, $\text{DMSO-}d_6$ ) spectra of compound <b>5v</b> .....  | 98  |
| <b>Figure 63.</b>                 | $^1\text{H}$ NMR (500 MHz, $\text{DMSO-}d_6$ ) spectra of compound <b>5v'</b> .....    | 99  |
| <b>Figure 64.</b>                 | $^{13}\text{C}$ NMR (125 MHz, $\text{DMSO-}d_6$ ) spectra of compound <b>5v'</b> ..... | 100 |
| <b>Figure 65.</b>                 | $^1\text{H}$ NMR (500 MHz, $\text{DMSO-}d_6$ ) spectra of compound <b>5w</b> .....     | 101 |
| <b>Figure 66.</b>                 | $^{13}\text{C}$ NMR (125 MHz, $\text{DMSO-}d_6$ ) spectra of compound <b>5w</b> .....  | 102 |
| <b>Figure 67.</b>                 | $^1\text{H}$ NMR (500 MHz, $\text{DMSO-}d_6$ ) spectra of compound <b>5w'</b> .....    | 103 |
| <b>Figure 68.</b>                 | $^{13}\text{C}$ NMR (125 MHz, $\text{DMSO-}d_6$ ) spectra of compound <b>5w'</b> ..... | 104 |
| <b>Figure 69.</b>                 | $^1\text{H}$ NMR (500 MHz, $\text{DMSO-}d_6$ ) spectra of compound <b>5x</b> .....     | 105 |
| <b>Figure 71.</b>                 | $^1\text{H}$ NMR (500 MHz, $\text{DMSO-}d_6$ ) spectra of compound <b>5x'</b> .....    | 107 |
| <b>Figure 72.</b>                 | $^{13}\text{C}$ NMR (125 MHz, $\text{DMSO-}d_6$ ) spectra of compound <b>5x'</b> ..... | 108 |
| <b>References and Notes</b> ..... |                                                                                        | 109 |

## General Information

All compounds were fully characterized by spectroscopic data. The NMR spectra were recorded on a Bruker DRX500 ( $^1\text{H}$ : 500 MHz,  $^{13}\text{C}$ : 125 MHz), chemical shifts ( $\delta$ ) are expressed in ppm, and  $J$  values are given in Hz, and deuterated  $\text{CDCl}_3$  and  $\text{DMSO}-d_6$  were used as solvent. IR spectra were recorded on a FT-IR Thermo Nicolet Avatar 360 using KBr pellet. The reactions were monitored by thin layer chromatography (TLC) using silica gel GF<sub>254</sub>. The melting points were determined on XT-4A melting point apparatus and are uncorrected. HRMs were performed on a Agilent LC/Msd TOF instrument.

All chemicals and solvents were used as received without further purification unless otherwise stated. Column chromatography was performed on silica gel (200–300 mesh).

Compounds **2** were prepared according to the literature<sup>1</sup>. The materials **3a–c** were purchased from Aldrich Corporation Limited.

## General Procedure for the Preparation of Spirooxindole Derivatives **5** and **5'**

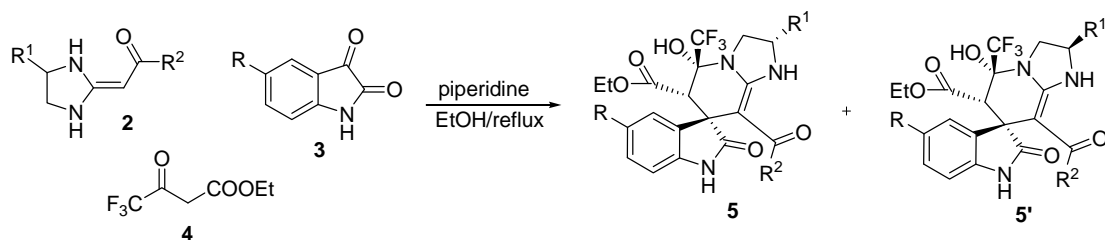

HKAs **2** (1 mmol), indoline-2,3-dione **3** (1.1 mmol), ethyl trifluoroacetate **4** (1.1 mmol), ethanol (15 mL) and piperidine (4 drops) were charged into a 25 mL round-bottom flask, and the mixture was refluxed. The resulting solution was stirred for 2 h until the HKAs **2** were completely consumed. The mixture was cooled to room temperature, then EtOAc (50 mL  $\times$  2) were added. The organic phase was washed with water (20 mL), dried over  $\text{Na}_2\text{SO}_4$ , concentrated and purified by flash column chromatography to afford spirooxindole derivatives **5** and diastereoisomers **5'** in a 80~93% yield.

### Spectroscopic Data of Spirooxindole Derivatives 5 and 5'

**(3'S,5R,6S)-Ethyl 8-(4-chlorobenzoyl)-5'-fluoro-5-hydroxy-2'-oxo-5-(trifluoromethyl)-2,3,5,6-tetrahydro-1H-spiro[imidazo[1,2-a]pyridine-7,3'-indoline]-6-carboxylate (5a)**

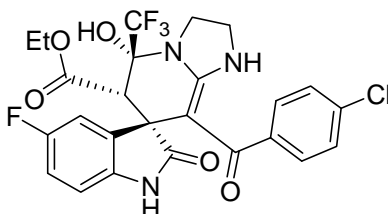

White solid; Mp 235–237 °C; IR (KBr): 3179, 3080, 1743, 1692, 1598, 1499, 1382, 1327, 1170, 1021, 816, 677 cm<sup>-1</sup>; <sup>1</sup>H NMR (500 MHz, DMSO-*d*<sub>6</sub>): δ = 0.62 (t, *J* = 6.5 Hz, 3H, CH<sub>3</sub>), 3.58–3.79 (m, 7H, NCH<sub>2</sub>CH<sub>2</sub>N, OCH<sub>2</sub> and CH), 6.21–6.24 (m, 1H, ArH), 6.67–7.37 (m, 7H, ArH), 8.33 (br, 1H, NH), 9.55 (br, 1H, OH), 10.75 (br, 1H, NH); <sup>13</sup>C NMR (125 MHz, DMSO-*d*<sub>6</sub>): δ = 13.4, 42.4, 44.2, 51.0, 52.3, 60.8, 83.6–84.1 (q, *J* = 30.0 Hz), 85.9, 110.8 (d, *J* = 7.5 Hz), 112.4 (d, *J* = 25.0 Hz), 115.3 (d, *J* = 22.5 Hz), 122.8 (q, *J* = 286.3 Hz), 127.5, 127.7, 132.4, 134.1 (d, *J* = 8.8 Hz), 137.9, 140.8, 158.2, 160.1 (d, *J* = 7.5 Hz), 166.5, 182.7, 188.8; HRMS (TOF ES<sup>+</sup>): *m/z* calcd for C<sub>25</sub>H<sub>21</sub>ClF<sub>4</sub>N<sub>3</sub>O<sub>5</sub> [(M+H)<sup>+</sup>], 554.1100; found, 554.1097.

**(3'S,5R,6S)-Ethyl 5'-chloro-8-(4-chlorobenzoyl)-5-hydroxy-2'-oxo-5-(trifluoromethyl)-2,3,5,6-tetrahydro-1H-spiro[imidazo[1,2-a]pyridine-7,3'-indoline]-6-carboxylate (5b)**

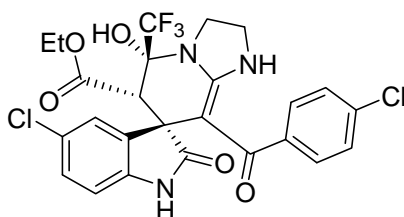

White solid; Mp 203–207 °C; IR (KBr): 3171, 3097, 1744, 1698, 1595, 1502, 1385, 1328, 1178, 1016, 810 cm<sup>-1</sup>; <sup>1</sup>H NMR (500 MHz, DMSO-*d*<sub>6</sub>): δ = 0.62 (t, *J* = 7.0 Hz, 3H, CH<sub>3</sub>), 3.57–3.82 (m, 7H, NCH<sub>2</sub>CH<sub>2</sub>N, OCH<sub>2</sub> and CH), 6.27 (d, *J* = 8.3 Hz, 1H, ArH), 6.68–7.05 (m, 5H, ArH), 7.52 (d, *J* = 1.7 Hz, 1H, ArH), 8.18 (br, 1H, NH), 9.41 (br, 1H, OH), 10.83 (br, 1H, NH); <sup>13</sup>C NMR (125 MHz, DMSO-*d*<sub>6</sub>): δ = 13.9, 42.9, 44.7, 51.4, 52.6, 61.3, 84.2 (q, *J* = 30.0 Hz), 86.4, 111.9, 123.3 (q, *J* = 286.3 Hz), 125.3, 127.7, 127.8, 128.4, 129.2, 133.1, 134.8, 141.2, 141.3, 160.5, 170.0, 183.0, 189.2; HRMS (TOF ES<sup>+</sup>): *m/z* calcd for C<sub>25</sub>H<sub>21</sub>Cl<sub>2</sub>F<sub>3</sub>N<sub>3</sub>O<sub>5</sub> [(M+H)<sup>+</sup>], 570.0805; found, 570.0807.

**(3'S,5R,6S)-Ethyl 8-(4-chlorobenzoyl)-5-hydroxy-2'-oxo-5-(trifluoro-methyl)-2,3,5,6-tetra-hydro-1H-spiro[imidazo[1,2-a]pyridine-7,3'-indoline]-6-carboxylate (5c)**

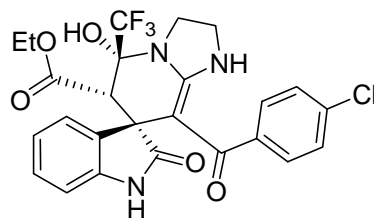

White solid; Mp 227–228.5 °C; IR (KBr): 3180, 3072, 1743, 1686, 1601, 1494, 1377, 1180, 1018, 751, 678 cm<sup>-1</sup>; <sup>1</sup>H NMR (500 MHz, DMSO-*d*<sub>6</sub>): δ = 0.55–0.59 (m, 3H, CH<sub>3</sub>), 3.56–3.74 (m, 7H, NCH<sub>2</sub>CH<sub>2</sub>N, OCH<sub>2</sub> and CH), 6.23 (d, *J* = 7.5 Hz, 1H, ArH), 6.34 (m, 1H, ArH), 6.63–6.69 (m, 2H, ArH), 6.91–6.97 (m, 5H, ArH), 7.29 (d, *J* = 7.4 Hz, 1H, ArH), 8.42 (br, 1H, NH), 9.63 (br, 1H, OH), 10.69 (br, 1H, NH); <sup>13</sup>C NMR (125 MHz, DMSO-*d*<sub>6</sub>): δ = 13.3, 42.4, 44.2, 51.4, 51.8, 60.8, 83.6 (q, *J* = 30.0 Hz), 86.1, 110.0, 122.8, 124.3, 127.1, 127.3, 127.5, 127.9, 128.9, 131.3, 140.8, 141.7, 160.2, 166.4, 182.6, 189.2; HRMS (TOF ES<sup>+</sup>): *m/z* calcd for C<sub>25</sub>H<sub>22</sub>ClF<sub>3</sub>N<sub>3</sub>O<sub>5</sub> [(M+H)<sup>+</sup>], 536.1195; found, 536.1198.

**(3'S,5R,6S)-Ethyl 8-benzoyl-5'-fluoro-5-hydroxy-2'-oxo-5-(trifluoromethyl)-2,3,5,6-tetra-hydro-1H-spiro[imidazo[1,2-a]pyridine-7,3'-indoline]-6-carboxylate (5d)**

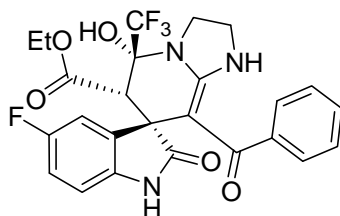

White solid; Mp 183–186 °C; IR (KBr): 3184, 1741, 1688, 1600, 1494, 1378, 1172, 1023, 697 cm<sup>-1</sup>; <sup>1</sup>H NMR (500 MHz, DMSO-*d*<sub>6</sub>): δ = 0.61 (t, *J* = 5.6 Hz, 3H, CH<sub>3</sub>), 3.56–3.76 (m, 7H, NCH<sub>2</sub>CH<sub>2</sub>N, OCH<sub>2</sub> and CH), 6.16 (t, *J* = 4.1 Hz, 1H, ArH), 6.68–7.07 (m, 6H, ArH), 7.33 (d, *J* = 8.3 Hz, 1H, ArH), 8.37 (br, 1H, NH), 9.51 (br, 1H, OH), 10.71 (br, 1H, NH); <sup>13</sup>C NMR (125 MHz, DMSO-*d*<sub>6</sub>): δ = 13.4, 42.3, 44.1, 51.2, 52.4, 60.8, 83.7 (q, *J* = 11.3 Hz), 85.9, 111.0, 112.2, 115.1, 122.9 (q, *J* = 287.5 Hz), 125.8, 127.3, 127.6, 134.1, 137.8, 142.2, 158.2, 160.0, 166.5, 182.7, 190.3; HRMS (TOF ES<sup>+</sup>): *m/z* calcd for C<sub>25</sub>H<sub>22</sub>F<sub>4</sub>N<sub>3</sub>O<sub>5</sub> [(M+H)<sup>+</sup>], 520.1490; found, 520.1488.

**(3'S,5R,6S)-Ethyl 8-benzoyl-5'-chloro-5-hydroxy-2'-oxo-5-(trifluoromethyl)-2,3,5,6-tetra-hydro-1H-spiro[imidazo[1,2-a]pyridine-7,3'-indoline]-6-carboxylate**

(5e)

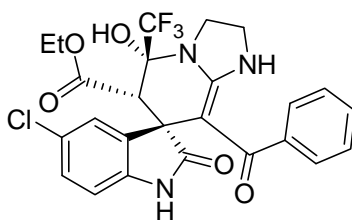

White solid; Mp 228–229 °C; IR (KBr): 3329, 1693, 1600, 1515, 1475, 1379, 1332, 1181, 1015, 633  $\text{cm}^{-1}$ ;  $^1\text{H}$  NMR (500 MHz,  $\text{DMSO-}d_6 + \text{HClO}_4$ ):  $\delta$  = 0.61 (t,  $J$  = 6.1 Hz, 3H,  $\text{CH}_3$ ), 3.59–3.81 (m, 7H,  $\text{NCH}_2\text{CH}_2\text{N}$ ,  $\text{OCH}_2$  and CH), 6.20 (d,  $J$  = 3.9 Hz, 1H, ArH), 6.69–7.07 (m, 6H, ArH), 7.50 (s, 1H, ArH), 8.25 (br, 1H, NH), 9.36 (br, 1H, OH), 10.79 (br, 1H, NH);  $^{13}\text{C}$  NMR (125 MHz,  $\text{DMSO-}d_6 + \text{HClO}_4$ ):  $\delta$  = 13.4, 42.3, 44.1, 51.0, 52.2, 60.8, 83.6 (q,  $J$  = 18.8 Hz), 85.8, 111.4, 122.8 (q,  $J$  = 286.3 Hz), 124.6, 125.9, 127.0, 127.4, 127.7, 128.6, 134.3, 140.7, 142.2, 159.9, 166.5, 182.6, 190.2; HRMS (TOF  $\text{ES}^+$ ):  $m/z$  calcd for  $\text{C}_{25}\text{H}_{22}\text{ClF}_3\text{N}_3\text{O}_5$  [(M+H) $^+$ ], 536.1195; found, 536.1194.

**(3'S,5R,6S)-Ethyl 8-benzoyl-5-hydroxy-2'-oxo-5-(trifluoromethyl)-2,3,5,6-tetrahydro-1H-spiro[imidazo[1,2-a]pyridine-7,3'-indoline]-6-carboxylate (5f)**

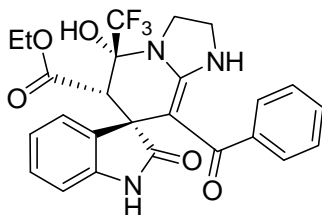

White solid; Mp 220–224 °C; IR (KBr): 3195, 1741, 1678, 1605, 1482, 1177, 1023, 755, 696  $\text{cm}^{-1}$ ;  $^1\text{H}$  NMR (500 MHz,  $\text{DMSO-}d_6$ ):  $\delta$  = 0.56–0.58 (m, 3H,  $\text{CH}_3$ ), 3.40–3.78 (m, 7H,  $\text{NCH}_2\text{CH}_2\text{N}$ ,  $\text{OCH}_2$  and CH), 6.17 (d,  $J$  = 5.0 Hz, 1H, ArH), 6.61–7.05 (m, 7H, ArH), 7.24–7.25 (m, 1H, ArH), 8.46 (br, 1H, NH), 9.51 (br, 1H, OH), 10.63 (m, 1H, NH);  $^{13}\text{C}$  NMR (125 MHz,  $\text{DMSO-}d_6$ ):  $\delta$  = 13.3, 42.3, 44.2, 51.7, 60.7, 83.7 (q,  $J$  = 17.5 Hz), 86.1, 110.1, 122.2 (q,  $J$  = 17.5 Hz), 121.7, 122.7, 124.1, 125.7, 127.1, 127.4, 128.8, 132.2, 141.7, 142.2, 160.0, 166.4, 182.6, 190.7; HRMS (TOF  $\text{ES}^+$ ):  $m/z$  calcd for  $\text{C}_{25}\text{H}_{23}\text{F}_3\text{N}_3\text{O}_5$  [(M+H) $^+$ ], 502.1584; found, 502.1585.

**(3'S,5R,6S)-Ethyl 5'-fluoro-5-hydroxy-8-(4-methylbenzoyl)-2'-oxo-5-(trifluoromethyl)-2,3,5,6-tetrahydro-1H-spiro[imidazo[1,2-a]pyridine-7,3'-indoline]-6-carboxylate (5g)**

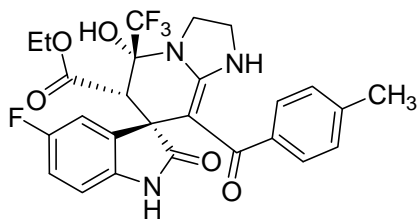

White solid; Mp 224.5–227 °C; IR (KBr): 3218, 1746, 1687, 1606, 1507, 1022, 823  $\text{cm}^{-1}$ ;  $^1\text{H}$  NMR (500 MHz,  $\text{CDCl}_3 + \text{DMSO-}d_6$ ):  $\delta$  = 0.68 (t,  $J$  = 13.7 Hz, 3H,  $\text{CH}_3$ ), 2.12 (s, 3H,  $\text{ArCH}_3$ ), 3.17–3.80 (m, 7H,  $\text{NCH}_2\text{CH}_2\text{N}$ ,  $\text{OCH}_2$  and CH), 6.08–6.10 (m, 1H, ArH), 6.52–6.82 (m, 6H, ArH), 8.31 (br, 1H, NH), 9.56 (br, 1H, OH), 10.36 (br, 1H, NH);  $^{13}\text{C}$  NMR (125 MHz,  $\text{CDCl}_3 + \text{DMSO-}d_6$ ):  $\delta$  = 13.2, 21.1, 42.0, 44.0, 51.5, 52.2, 60.8, 83.6 (q,  $J$  = 81.3 Hz), 86.1, 110.7–111.1 (m), 114.7 (d,  $J$  = 23.8 Hz), 122.5 (q,  $J$  = 286.3 Hz), 125.5, 127.6, 133.6, 137.1, 137.5, 138.8, 158.2, 160.2, 160.4, 166.1, 182.5, 191.5; HRMS (TOF  $\text{ES}^+$ ):  $m/z$  calcd for  $\text{C}_{26}\text{H}_{24}\text{F}_4\text{N}_3\text{O}_5$  [( $\text{M}+\text{H}$ ) $^+$ ], 534.1647; found, 534.1647.

**(3'S,5R,6S)-Ethyl 5'-chloro-5-hydroxy-8-(4-methylbenzoyl)-2'-oxo-5-(trifluoromethyl)-2,3,5,6-tetrahydro-1H-spiro[imidazo[1,2-a]pyridine-7,3'-indoline]-6-carboxylate (5h)**

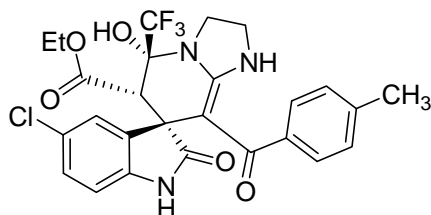

White solid; Mp 223–226 °C; IR (KBr): 3224, 1744, 1689, 1603, 1484, 1377, 1177, 1025, 759  $\text{cm}^{-1}$ ;  $^1\text{H}$  NMR (500 MHz,  $\text{DMSO-}d_6$ ):  $\delta$  = 0.47 (t,  $J$  = 6.8 Hz, 3H,  $\text{CH}_3$ ), 1.92 (s, 3H,  $\text{ArCH}_3$ ), 3.22 (s, 1H, CH), 3.36–3.65 (m, 6H,  $\text{NCH}_2\text{CH}_2\text{N}$  and  $\text{OCH}_2$ ), 5.88 (d,  $J$  = 8.2 Hz, 1H, ArH), 6.41–6.80 (m, 6H, ArH), 7.97 (br, 1H, NH), 9.37 (br, 1H, OH), 10.13 (br, 1H, NH);  $^{13}\text{C}$  NMR (125 MHz,  $\text{DMSO-}d_6$ ):  $\delta$  = 13.5, 21.3, 42.4, 44.3, 51.9, 52.2, 61.2, 83.8 (q,  $J$  = 31.3 Hz), 86.4, 111.5, 121.5–128.5 (m), 124.0, 125.9, 127.9, 128.5, 134.0, 137.5, 139.1, 140.4, 160.8, 166.5, 182.5, 192.0; HRMS (TOF  $\text{ES}^+$ ):  $m/z$  calcd for  $\text{C}_{26}\text{H}_{24}\text{ClF}_3\text{N}_3\text{O}_5$  [( $\text{M}+\text{H}$ ) $^+$ ], 550.1351; found, 550.1350.

**(3'S,5R,6S)-Ethyl 5-hydroxy-8-(4-methylbenzoyl)-2'-oxo-5-(trifluoromethyl)-2,3,5,6-tetrahydro-1H-spiro[imidazo[1,2-a]pyridine-7,3'-indoline]-6-carboxylate (5i)**



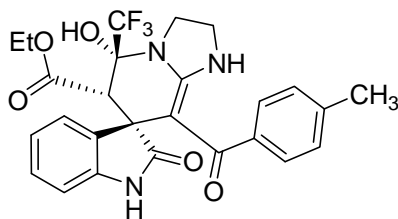

White solid; Mp 164–165.5 °C; IR (KBr): 3228, 1749, 1680, 1599, 1506, 1377, 1167, 1021, 605  $\text{cm}^{-1}$ ;  $^1\text{H}$  NMR (500 MHz,  $\text{DMSO-}d_6$ ):  $\delta$  = 0.58 (t,  $J$  = 6.6 Hz, 3H,  $\text{CH}_3$ ), 2.18 (s, 3H,  $\text{ArCH}_3$ ), 3.56–3.72 (m, 7H,  $\text{NCH}_2\text{CH}_2\text{N}$ ,  $\text{OCH}_2$  and CH), 6.25 (d,  $J$  = 7.6 Hz, 1H, ArH), 6.60 (d,  $J$  = 6.0 Hz, 2H, ArH), 6.59–6.94 (m, 4H, ArH), 7.23 (d,  $J$  = 7.4 Hz, 1H, ArH), 8.46 (br, 1H, NH), 9.06 (br, 1H, OH), 10.63 (br, 1H, NH);  $^{13}\text{C}$  NMR (125 MHz,  $\text{DMSO-}d_6$ ):  $\delta$  = 13.4, 21.2, 42.3, 44.2, 51.5, 52.0, 60.7, 83.8 (q,  $J$  = 30.0 Hz), 86.3, 110.0, 121.8, 122.6, 124.0, 126.1, 127.8, 128.6, 132.3, 137.0, 139.4, 142.0, 159.6, 166.5, 182.7, 190.8; HRMS (TOF  $\text{ES}^+$ ):  $m/z$  calcd for  $\text{C}_{26}\text{H}_{25}\text{F}_3\text{N}_3\text{O}_5$  [( $\text{M}+\text{H}$ ) $^+$ ], 516.1741; found, 516.1742.

**(3'S,5R,6S)-Ethyl 5'-fluoro-5-hydroxy-8-(4-methoxybenzoyl)-2'-oxo-5-(trifluoromethyl)-2,3,5,6-tetrahydro-1H-spiro[imidazo[1,2-*a*]pyridine-7,3'-indoline]-6-carboxylate (5j)**

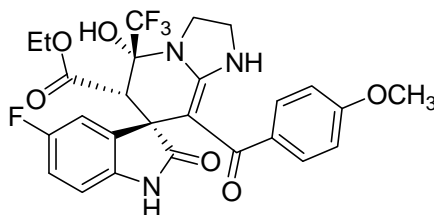

White solid; Mp 225–228.5 °C; IR (KBr): 3223, 1738, 1693, 1597, 1530, 1257, 1169, 1024, 696, 609  $\text{cm}^{-1}$ ;  $^1\text{H}$  NMR (500 MHz,  $\text{DMSO-}d_6$ ):  $\delta$  = 0.64 (t,  $J$  = 6.8 Hz, 3H,  $\text{CH}_3$ ), 3.28–3.81 (m, 10H,  $\text{NCH}_2\text{CH}_2\text{N}$ ,  $\text{OCH}_2$ ,  $\text{OCH}_3$  and CH), 6.34–6.36 (m, 1H, ArH), 6.63–7.00 (m, 5H, ArH), 7.29 (d,  $J$  = 8.3 Hz, 1H, ArH), 8.37 (br, 1H, NH), 8.48 (br, 1H, OH), 10.76 (br, 1H, NH);  $^{13}\text{C}$  NMR (125 MHz,  $\text{DMSO-}d_6$ ):  $\delta$  = 13.4, 42.2, 44.2, 50.9, 52.7, 55.4, 60.8, 83.6–84.2 (m), 86.1, 110.7, 111.7 (d,  $J$  = 25.0 Hz), 113.1, 114.9 (d,  $J$  = 23.8 Hz), 122.9 (q,  $J$  = 287.5 Hz), 128.3, 134.6, 138.2, 158.1, 158.9, 159.6, 160.0, 166.6, 182.9, 190.0; HRMS (TOF  $\text{ES}^+$ ):  $m/z$  calcd for  $\text{C}_{26}\text{H}_{24}\text{F}_4\text{N}_3\text{O}_6$  [( $\text{M}+\text{H}$ ) $^+$ ], 550.1596; found, 550.1595.

**(3'S,5R,6S)-Ethyl 5'-chloro-5-hydroxy-8-(4-methoxybenzoyl)-2'-oxo-5-(trifluoromethyl)-2,3,5,6-tetrahydro-1H-spiro[imidazo[1,2-*a*]pyridine-7,3'-indoline]-6-carboxylate (5k)**

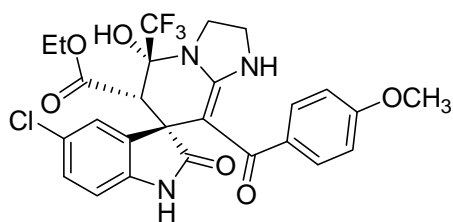

White solid; Mp 178–180 °C; IR (KBr): 3162, 1743, 1692, 1597, 1492, 1382, 1177, 1013, 660  $\text{cm}^{-1}$ ;  $^1\text{H}$  NMR (500 MHz,  $\text{DMSO-}d_6$ ):  $\delta$  = 0.65 (t,  $J$  = 6.9 Hz, 3H,  $\text{CH}_3$ ), 3.48–3.82 (m, 7H,  $\text{NCH}_2\text{CH}_2\text{N}$ ,  $\text{OCH}_2$  and CH), 3.70 (s, 3H,  $\text{OCH}_3$ ), 6.40 (d,  $J$  = 8.2 Hz, 1H, ArH), 6.66 (d,  $J$  = 7.8 Hz, 2H, ArH), 6.88 (d,  $J$  = 7.8 Hz, 2H, ArH), 7.04 (d,  $J$  = 8.2 Hz, 1H, ArH), 7.46 (s, 1H, ArH), 8.23 (br, 1H, NH), 8.27 (br, 1H, OH), 10.86 (br, 1H, NH);  $^{13}\text{C}$  NMR (125 MHz,  $\text{DMSO-}d_6$ ):  $\delta$  = 13.4, 42.3, 44.2, 50.9, 52.6, 55.5, 60.8, 83.8 (q,  $J$  = 30.0 Hz), 86.1, 111.3, 113.2, 121.8, 124.1, 126.9, 128.4, 128.5, 134.6, 134.6, 141.1, 159.0, 159.7, 166.6, 182.7, 189.8; HRMS (TOF  $\text{ES}^+$ ):  $m/z$  calcd for  $\text{C}_{26}\text{H}_{24}\text{ClF}_3\text{N}_3\text{O}_6$   $[(\text{M}+\text{H})^+]$ , 566.1300; found, 566.1300.

**(3'S,5R,6S)-Ethyl 5-hydroxy-8-(4-methoxybenzoyl)-2'-oxo-5-(trifluoromethyl)-2,3,5,6-tetrahydro-1H-spiro[imidazo[1,2-a]pyridine-7,3'-indoline]-6-carboxylate (5l)**

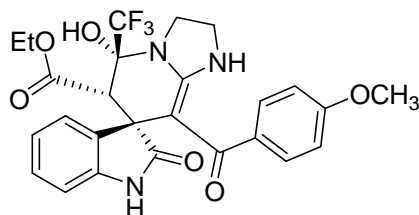

White solid; Mp 227–229.5 °C; IR (KBr): 3153, 1739, 1688, 1595, 1491, 1375, 1251, 1117, 1023, 757  $\text{cm}^{-1}$ ;  $^1\text{H}$  NMR (500 MHz,  $\text{DMSO-}d_6$ ):  $\delta$  = 0.59 (t,  $J$  = 6.3 Hz, 3H,  $\text{CH}_3$ ), 3.39–3.80 (m, 6H,  $\text{NCH}_2\text{CH}_2\text{N}$ ,  $\text{OCH}_2$  and CH), 3.73–3.76 (m, 3H,  $\text{OCH}_3$ ), 6.34 (d,  $J$  = 7.6 Hz, 1H, ArH), 6.58 (d,  $J$  = 7.5 Hz, 2H, ArH), 6.76 (d,  $J$  = 7.5 Hz, 2H, ArH), 6.86–6.97 (m, 2H, ArH), 7.22 (d,  $J$  = 7.4 Hz, 2H, ArH), 8.44 (br, 1H, NH), 8.52 (br, 1H, OH), 10.67 (br, 1H, NH);  $^{13}\text{C}$  NMR (125 MHz,  $\text{DMSO-}d_6$ ):  $\delta$  = 13.4, 42.2, 44.2, 51.5, 52.2, 55.5, 60.7, 83.9 (q,  $J$  = 30.0 Hz), 86.4, 110.0, 113.0, 121.8, 122.6, 123.7, 128.1, 128.7, 132.4, 134.7, 142.1, 159.1, 159.4, 166.5, 182.8, 190.3; HRMS (TOF  $\text{ES}^+$ ):  $m/z$  calcd for  $\text{C}_{26}\text{H}_{25}\text{F}_3\text{N}_3\text{O}_6$   $[(\text{M}+\text{H})^+]$ , 532.1690; found, 532.1689.

**(2S,3'S,5R,6S)-Ethyl 8-(4-chlorobenzoyl)-5'-fluoro-5-hydroxy-2-methyl-2'-oxo-5-(trifluoromethyl)-2,3,5,6-tetrahydro-1H-spiro[imidazo[1,2-a]pyridine-7,3'-indoline]-6-carboxylate (5m)**

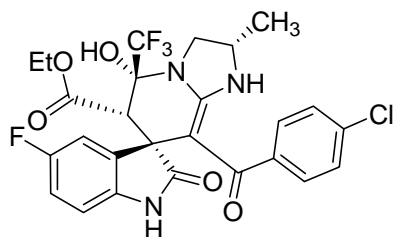

White solid; Mp 217–218 °C; IR (KBr): 3179, 1742, 1691, 1596, 1496, 1382, 1180, 1012, 667  $\text{cm}^{-1}$ ;  $^1\text{H}$  NMR (500 MHz,  $\text{DMSO-}d_6$ ):  $\delta$  = 0.58–0.62 (m, 3H,  $\text{CH}_3$ ), 1.32 (d,  $J$  = 4.9 Hz, 3H,  $\text{CH}_3$ ), 3.24–3.29 (m, 1H,  $\text{NCH}_2$ ), 3.59–4.06 (m, 5H,  $\text{NCH}_2\text{CHN}$ ,  $\text{OCH}_2$  and  $\text{CH}$ ), 6.18–6.20 (m, 1H,  $\text{ArH}$ ), 6.13–7.00 (m, 5H,  $\text{ArH}$ ), 7.36 (d,  $J$  = 7.7 Hz, 1H,  $\text{ArH}$ ), 8.36 (br, 1H,  $\text{NH}$ ), 9.84 (br, 1H,  $\text{OH}$ ), 10.74 (br, 1H,  $\text{NH}$ );  $^{13}\text{C}$  NMR (125 MHz,  $\text{DMSO-}d_6$ ):  $\delta$  = 13.4, 20.0, 50.6, 50.8, 51.0, 52.2, 60.8, 83.4–83.8 (q,  $J$  = 17.5 Hz), 85.6, 110.8, 112.5 (d,  $J$  = 26.3 Hz), 115.3 (d,  $J$  = 22.5 Hz), 122.8 (q,  $J$  = 286.3 Hz), 127.2, 127.5, 132.3, 134.0, 137.7 (d,  $J$  = 17.5 Hz), 140.8, 158.3, 159.6–160.1 (m), 166.4, 182.6 (d,  $J$  = 16.3 Hz), 189.1; HRMS (TOF  $\text{ES}^+$ ):  $m/z$  calcd for  $\text{C}_{26}\text{H}_{23}\text{ClF}_4\text{N}_3\text{O}_5$  [( $\text{M}+\text{H}$ ) $^+$ ], 568.1257; found, 568.1257.

**(2R,3'S,5R,6S)-Ethyl 8-(4-chlorobenzoyl)-5'-fluoro-5-hydroxy-2-methyl-2'-oxo-5-(trifluoromethyl)-2,3,5,6-tetrahydro-1H-spiro[imidazo[1,2-a]pyridine-7,3'-indoline]-6-carboxylate (5m')**

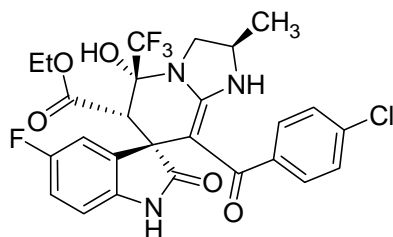

White solid; Mp 221–224.5 °C; IR (KBr): 3324, 3264, 1738, 1691, 1598, 1503, 1381, 1336, 1278, 1179, 1018, 756, 678  $\text{cm}^{-1}$ ;  $^1\text{H}$  NMR (500 MHz,  $\text{DMSO-}d_6$ ):  $\delta$  = 0.85–0.90 (m, 3H,  $\text{CH}_3$ ), 1.41 (d,  $J$  = 6.1 Hz, 3H,  $\text{CH}_3$ ), 3.19–3.21 (m, 1H,  $\text{NCH}_2$ ), 3.69–4.09 (m, 5H,  $\text{NCH}_2\text{CHN}$ ,  $\text{OCH}_2$  and  $\text{CH}$ ), 6.22–6.24 (m, 1H,  $\text{ArH}$ ), 6.68–6.89 (m, 5H,  $\text{ArH}$ ), 7.34 (d,  $J$  = 7.5 Hz, 1H,  $\text{ArH}$ ), 8.22–8.24 (m, 1H,  $\text{NH}$ ), 9.61 (br, 1H,  $\text{OH}$ ), 10.75 (br, 1H,  $\text{NH}$ );  $^{13}\text{C}$  NMR (125 MHz,  $\text{DMSO-}d_6$ ):  $\delta$  = 13.4, 21.2, 49.7, 50.8, 52.2, 60.9, 79.4, 83.6 (q,  $J$  = 30.0 Hz), 85.5, 110.9, 112.4 (d,  $J$  = 23.8 Hz), 115.2 (d,  $J$  = 22.5 Hz), 122.8 (q,  $J$  = 287.5 Hz), 127.2, 127.8, 132.5, 134.0, 137.8 (d,  $J$  = 18.8 Hz), 140.7, 158.2, 159.1, 160.1, 166.4, 182.6, 188.7; HRMS (TOF  $\text{ES}^+$ ):  $m/z$  calcd for  $\text{C}_{26}\text{H}_{23}\text{ClF}_4\text{N}_3\text{O}_5$  [( $\text{M}+\text{H}$ ) $^+$ ], 568.1257; found, 568.1257.

**(2*S*,3'*S*,5*R*,6*S*)-Ethyl 5'-chloro-8-(4-chlorobenzoyl)-5-hydroxy-2-methyl-2'-oxo-5-(trifluoromethyl)-2,3,5,6-tetrahydro-1*H*-spiro[imidazo[1,2-*a*]pyridine-7,3'-indoline]-6-carboxylate (5n)**

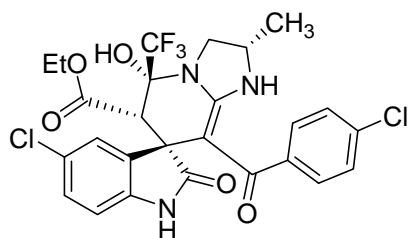

White solid; Mp 228–231 °C; IR (KBr): 3164, 1743, 1693, 1595, 1493, 1383, 1179, 1085, 1010, 663  $\text{cm}^{-1}$ ;  $^1\text{H}$  NMR (500 MHz,  $\text{DMSO-}d_6$ ):  $\delta$  = 0.60 (q,  $J$  = 6.9 Hz, 3H,  $\text{CH}_3$ ), 1.31 (d,  $J$  = 5.6 Hz, 3H,  $\text{CH}_3$ ), 3.27 (t,  $J$  = 9.9 Hz, 1H,  $\text{NCH}_2$ ), 3.57–4.09 (m, 5H,  $\text{NCH}_2\text{CHN}$ ,  $\text{OCH}_2$  and  $\text{CH}$ ), 6.22 (d,  $J$  = 8.1 Hz, 1H, ArH), 6.61–6.65 (m, 2H, ArH), 6.99–7.02 (m, 3H, ArH), 7.54 (s, 1H, ArH), 8.23 (br, 1H, NH), 9.73 (br, 1H, OH), 10.83 (br, 1H, NH);  $^{13}\text{C}$  NMR (125 MHz,  $\text{DMSO-}d_6$ ):  $\delta$  = 13.4, 20.0, 50.6, 50.7, 51.0, 52.1, 60.8, 83.5, 85.5, 111.4, 121.6, 123.9, 122.8, 124.9, 127.2, 127.7, 128.7, 132.4, 134.3, 140.5 (d,  $J$  = 20.0 Hz), 140.8, 159.7 (d,  $J$  = 18.8 Hz), 166.5, 182.4, 188.9; HRMS (TOF  $\text{ES}^+$ ):  $m/z$  calcd for  $\text{C}_{26}\text{H}_{23}\text{Cl}_2\text{F}_3\text{N}_3\text{O}_5$   $[(\text{M}+\text{H})^+]$ , 584.0961; found, 584.0964.

**(2*R*,3'*S*,5*R*,6*S*)-Ethyl 5'-chloro-8-(4-chlorobenzoyl)-5-hydroxy-2-methyl-2'-oxo-5-(trifluoromethyl)-2,3,5,6-tetrahydro-1*H*-spiro[imidazo[1,2-*a*]pyridine-7,3'-indoline]-6-carboxylate (5n')**

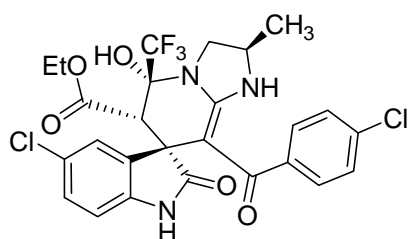

White solid; Mp 176–179.5 °C; IR (KBr): 3353, 1735, 1686, 1601, 1507, 1336, 1181, 1014, 619  $\text{cm}^{-1}$ ;  $^1\text{H}$  NMR (500 MHz,  $\text{DMSO-}d_6$ ):  $\delta$  = 0.61 (t,  $J$  = 6.9 Hz, 3H,  $\text{CH}_3$ ), 1.24 (t,  $J$  = 6.1 Hz, 3H,  $\text{CH}_3$ ), 3.18–3.20 (m, 1H,  $\text{NCH}_2$ ), 3.57–4.06 (m, 5H,  $\text{NCH}_2\text{CHN}$ ,  $\text{OCH}_2$  and  $\text{CH}$ ), 6.26 (t,  $J$  = 8.1 Hz, 1H, ArH), 6.68–6.72 (m, 2H, ArH), 7.00–7.04 (m, 3H, ArH), 7.58 (s, 1H, ArH), 8.13 (br, 1H, NH), 9.49 (br, 1H, OH), 10.82 (br, 1H, NH);  $^{13}\text{C}$  NMR (125 MHz,  $\text{DMSO-}d_6$ ):  $\delta$  = 13.4, 21.2, 49.6, 49.8, 50.8, 52.0, 60.8, 83.5, 85.5, 111.3, 122.8 (q,  $J$  = 286.3 Hz), 124.9, 127.1, 127.3, 128.0, 128.7, 132.6, 134.3, 140.6, 140.8, 158.8, 166.5, 182.4, 188.5; HRMS (TOF  $\text{ES}^+$ ):  $m/z$  calcd for  $\text{C}_{26}\text{H}_{23}\text{Cl}_2\text{F}_3\text{N}_3\text{O}_5$   $[(\text{M}+\text{H})^+]$ , 584.0961; found, 584.0963.

**(2*S*,3'*S*,5*R*,6*S*)-Ethyl 8-(4-chlorobenzoyl)-5-hydroxy-2-methyl-2'-oxo-5-(trifluoromethyl)-2,3,5,6-tetrahydro-1*H*-spiro[imidazo[1,2-*a*]pyridine-7,3'-indoline]-6-carboxylate (5o)**

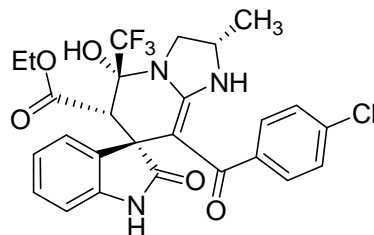

White solid; Mp 199–202 °C; IR (KBr): 3308, 1735, 1690, 1597, 1514, 1336, 1179, 1014, 756, 681 cm<sup>-1</sup>; <sup>1</sup>H NMR (500 MHz, DMSO-*d*<sub>6</sub> + HClO<sub>4</sub>): δ = 0.53–0.58 (m, 3H, CH<sub>3</sub>), 1.32 (d, *J* = 5.9 Hz, 3H, CH<sub>3</sub>), 3.24–3.29 (m, 1H, NCH<sub>2</sub>), 3.38–4.11 (m, 5H, NCH<sub>2</sub>CHN, OCH<sub>2</sub> and CH), 6.19 (d, *J* = 7.6 Hz, 1H, ArH), 6.53–6.56 (m, 2H, ArH), 6.88–6.96 (m, 4H, ArH), 7.27 (d, *J* = 7.4 Hz, 1H, ArH), 8.45 (br, 1H, NH), 9.88 (br, 1H, OH), 10.68 (br, 1H, NH); <sup>13</sup>C NMR (125 MHz, DMSO-*d*<sub>6</sub> + HClO<sub>4</sub>): δ = 13.3, 19.9, 50.4, 50.6, 51.0, 51.7, 60.8, 83.6 (q, *J* = 30.0 Hz), 85.8, 110.0, 121.7, 122.9, 124.4, 127.0, 127.4, 129.0, 132.0, 132.2, 140.8, 141.5, 159.8, 166.4, 182.6, 189.5; HRMS (TOF ES<sup>+</sup>): *m/z* calcd for C<sub>26</sub>H<sub>24</sub>ClF<sub>3</sub>N<sub>3</sub>O<sub>5</sub> [(M+H)<sup>+</sup>], 550.1351; found, 550.1349.

**(2*R*,3'*S*,5*R*,6*S*)-Ethyl 8-(4-chlorobenzoyl)-5-hydroxy-2-methyl-2'-oxo-5-(trifluoromethyl)-2,3,5,6-tetrahydro-1*H*-spiro[imidazo[1,2-*a*]pyridine-7,3'-indoline]-6-carboxylate (5o')**

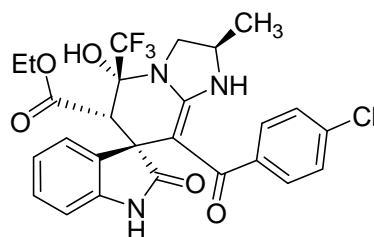

White solid; Mp 195–197 °C; IR (KBr): 3178, 1741, 1680, 1596, 1516, 1470, 1177, 1014, 753, 679 cm<sup>-1</sup>; <sup>1</sup>H NMR (500 MHz, DMSO-*d*<sub>6</sub>): δ = 0.73 (t, *J* = 6.9 Hz, 3H, CH<sub>3</sub>), 1.32 (d, *J* = 6.0 Hz, 3H, CH<sub>3</sub>), 3.54–4.26 (m, 6H, NCH<sub>2</sub>CHN, OCH<sub>2</sub> and CH), 6.19 (d, *J* = 8.4 Hz, 1H, ArH), 6.77–6.82 (m, 2H, ArH), 7.15–7.21 (m, 4H, ArH), 7.18 (d, *J* = 7.4 Hz, 1H, ArH), 8.27 (br, 1H, NH), 9.68 (br, 1H, OH), 10.55 (br, 1H, NH); <sup>13</sup>C NMR (125 MHz, DMSO-*d*<sub>6</sub>): δ = 13.8, 21.7, 50.1, 50.2, 51.3, 52.1, 61.3, 84.0, 86.3, 110.5, 122.1, 123.3, 124.9, 127.6, 127.6, 128.2, 129.4, 132.7, 141.4, 142.2, 159.6, 166.9, 183.1, 189.7; HRMS (TOF ES<sup>+</sup>): *m/z* calcd for C<sub>26</sub>H<sub>24</sub>ClF<sub>3</sub>N<sub>3</sub>O<sub>5</sub> [(M+H)<sup>+</sup>], 550.1351; found, 550.1349.

**(2*S*,3'*S*,5*R*,6*S*)-Ethyl 8-benzoyl-5'-fluoro-5-hydroxy-2-methyl-2'-oxo-5-(trifluoromethyl)-2,3,5,6-tetrahydro-1*H*-spiro[imidazo[1,2-*a*]pyridine-7,3'-indoline]-6-carboxylate (5p)**

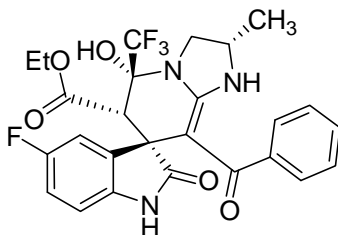

White solid; Mp 226–229 °C; IR (KBr): 3168, 1743, 1691, 1594, 1492, 1329, 1179, 1015, 697  $\text{cm}^{-1}$ ;  $^1\text{H}$  NMR (500 MHz,  $\text{DMSO-}d_6$ ):  $\delta$  = 0.60 (t,  $J$  = 6.5 Hz, 3H,  $\text{CH}_3$ ), 1.30–1.33 (m, 3H,  $\text{CH}_3$ ), 3.23–3.28 (m, 1H,  $\text{NCH}_2$ ), 3.43–3.75 (m, 4H,  $\text{NCH}_2$ ,  $\text{OCH}_2$  and CH), 4.02–4.09 (m, 1H,  $\text{NCH}$ ), 6.11–6.13 (m, 1H, ArH), 6.64–6.73 (m, 3H, ArH), 6.96–7.06 (m, 3H, ArH), 7.33 (d,  $J$  = 8.5 Hz, 1H, ArH), 8.42 (br, 1H, NH), 9.75 (br, 1H, OH), 10.70 (br, 1H, NH);  $^{13}\text{C}$  NMR (125 MHz,  $\text{DMSO-}d_6$ ):  $\delta$  = 13.4, 19.9, 50.4, 50.5, 51.0, 52.3, 60.8, 83.7 (q,  $J$  = 12.5 Hz), 85.6, 110.9, 112.3 (d,  $J$  = 25.0 Hz), 115.2 (d,  $J$  = 23.8 Hz), 121.7, 125.6, 127.2, 127.4, 134.0, 137.7 (d,  $J$  = 18.8 Hz), 142.3, 158.2, 159.8, 166.5, 182.7, 190.6; HRMS (TOF  $\text{ES}^+$ ):  $m/z$  calcd for  $\text{C}_{26}\text{H}_{24}\text{F}_4\text{N}_3\text{O}_5$   $[(\text{M}+\text{H})^+]$ , 534.1647; found, 534.1644.

**(2*R*,3'*S*,5*R*,6*S*)-Ethyl 8-benzoyl-5'-fluoro-5-hydroxy-2-methyl-2'-oxo-5-(trifluoromethyl)-2,3,5,6-tetrahydro-1*H*-spiro[imidazo[1,2-*a*]pyridine-7,3'-indoline]-6-carboxylate (5p')**

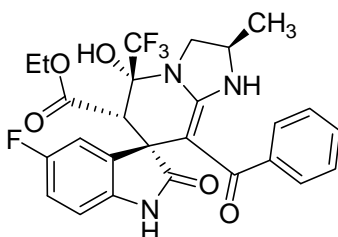

White solid; Mp 225–228 °C; IR (KBr): 3223, 1742, 1687, 1599, 1494, 1279, 1174, 1020, 756, 699  $\text{cm}^{-1}$ ;  $^1\text{H}$  NMR (500 MHz,  $\text{DMSO-}d_6$ ):  $\delta$  = 0.59–0.64 (m, 3H,  $\text{CH}_3$ ), 1.25 (d,  $J$  = 4.8 Hz, 3H,  $\text{CH}_3$ ), 3.17–3.21 (m, 1H,  $\text{NCH}_2$ ), 3.58–4.08 (m, 5H,  $\text{NCH}_2\text{CHN}$ ,  $\text{OCH}_2$  and CH), 6.17 (s, 1H, ArH), 6.70–6.75 (m, 3H, ArH), 6.98–7.07 (m, 3H, ArH), 7.34 (d,  $J$  = 7.5 Hz, 1H, ArH), 8.30 (br, 1H, NH), 9.53 (br, 1H, OH), 10.71 (br, 1H, NH);  $^{13}\text{C}$  NMR (125 MHz,  $\text{DMSO-}d_6$ ):  $\delta$  = 13.4, 21.2, 49.7, 50.7, 51.1, 52.3, 60.8, 83.6 (q,  $J$  = 28.8 Hz), 85.5, 110.9, 112.2 (d,  $J$  = 25.0 Hz), 115.0 (q,  $J$  = 23.8 Hz), 125.9, 127.3, 127.6, 134.1, 137.8, 142.2, 158.2, 159.0, 160.1, 166.5, 182.7, 190.2; HRMS (TOF  $\text{ES}^+$ ):  $m/z$  calcd for  $\text{C}_{26}\text{H}_{22}\text{F}_4\text{N}_3\text{O}_5$   $[\text{M}-\text{H}^+]$ , 532.1501; found, 532.1510.

**(2*S*,3'*S*,5*R*,6*S*)-ethyl 8-benzoyl-5'-chloro-5-hydroxy-2-methyl-2'-oxo-5-(trifluoromethyl)-2,3,5,6-tetrahydro-1*H*-spiro[imidazo[1,2-*a*]pyridine-7,3'-indoline]-6-carboxylate (5q)**

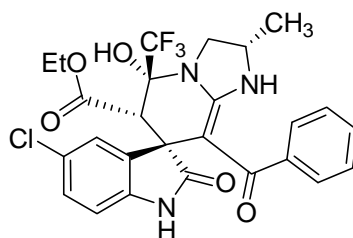

White solid; Mp 206–209.5 °C; IR (KBr): 3169, 1744, 1692, 1598, 1491, 1381, 1180, 1017, 707  $\text{cm}^{-1}$ ;  $^1\text{H}$  NMR (500 MHz,  $\text{DMSO-}d_6$ ):  $\delta$  = 0.60 (t,  $J$  = 6.5 Hz, 3H,  $\text{CH}_3$ ), 1.31 (d,  $J$  = 5.5 Hz, 3H,  $\text{CH}_3$ ), 3.25 (t,  $J$  = 9.8 Hz, 1H,  $\text{NCH}_2$ ), 3.57–3.79 (m, 3H,  $\text{NCH}_2$ ,  $\text{OCH}_2$ ), 4.03–4.07 (m, 1H,  $\text{NCH}$ ), 6.15 (d,  $J$  = 8.1 Hz, 1H, ArH), 6.62–6.66 (m, 2H, ArH), 6.93–7.07 (m, 4H, ArH), 7.50 (s, 1H, ArH), 8.29 (br, 1H, NH), 9.65 (br, 1H, OH), 10.79 (br, 1H, NH);  $^{13}\text{C}$  NMR (125 MHz,  $\text{DMSO-}d_6$ ):  $\delta$  = 13.4, 20.0, 50.4, 50.7, 50.9, 52.1, 60.8, 83.5, 85.5, 111.5, 121.7, 122.8 (q,  $J$  = 286.3 Hz), 124.7, 127.0, 127.3, 127.5, 128.6, 134.3, 140.5, 142.2, 159.7, 166.5, 182.6, 190.4; HRMS (TOF  $\text{ES}^+$ ):  $m/z$  calcd for  $\text{C}_{26}\text{H}_{24}\text{ClF}_3\text{N}_3\text{O}_5$  [( $\text{M}+\text{H}$ ) $^+$ ], 550.1351; found, 550.1352

**(2*R*,3'*S*,5*R*,6*S*)-ethyl 8-benzoyl-5'-chloro-5-hydroxy-2-methyl-2'-oxo-5-(trifluoromethyl)-2,3,5,6-tetrahydro-1*H*-spiro[imidazo[1,2-*a*]pyridine-7,3'-indoline]-6-carboxylate (5q')**

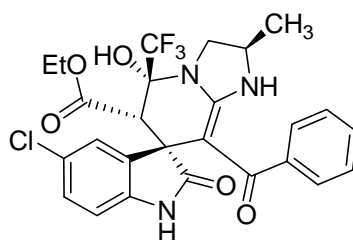

White solid; Mp 206–210 °C; IR (KBr): 3226, 1742, 1688, 1599, 1526, 1334, 1179, 1018, 756, 700  $\text{cm}^{-1}$ ;  $^1\text{H}$  NMR (500 MHz,  $\text{DMSO-}d_6$ ):  $\delta$  = 0.60 (t,  $J$  = 7.0 Hz, 3H,  $\text{CH}_3$ ), 1.24 (d,  $J$  = 4.9 Hz, 3H,  $\text{CH}_3$ ), 3.17–3.21 (m, 1H,  $\text{NCH}_2$ ), 3.46–4.07 (m, 5H,  $\text{NCH}_2\text{CHN}$ ,  $\text{OCH}_2$  and  $\text{CH}$ ), 6.17–6.20 (m, 1H, ArH), 6.67–6.72 (m, 2H, ArH), 6.94–7.08 (m, 4H, ArH), 7.54 (s, 1H, ArH), 8.30 (br, 1H, NH), 9.42 (br, 1H, OH), 10.78 (br, 1H, NH);  $^{13}\text{C}$  NMR (125 MHz,  $\text{DMSO-}d_6$ ):  $\delta$  = 13.4, 21.2, 49.5, 50.8, 51.0, 52.1, 60.8, 83.5 (q,  $J$  = 11.3 Hz), 85.4, 111.4, 122.8 (q,  $J$  = 286.3 Hz), 124.7, 126.0, 127.0, 127.4, 127.7, 128.6, 134.4, 140.6, 142.2, 158.8, 166.5, 182.6, 190.0; HRMS (TOF  $\text{ES}^+$ ):  $m/z$  calcd for  $\text{C}_{26}\text{H}_{24}\text{ClF}_3\text{N}_3\text{O}_5$  [( $\text{M}+\text{H}$ ) $^+$ ], 550.1351; found, 550.1350.

**(2*S*,3'*S*,5*R*,6*S*)-ethyl 8-benzoyl-5-hydroxy-2-methyl-2'-oxo-5-(trifluoromethyl)-2,3,5,6-tetrahydro-1*H*-spiro[imidazo[1,2-*a*]pyridine-7,3'-indoline]-6-carboxylate (5*r*)**

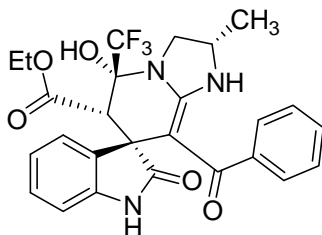

White solid; Mp 209–211.5 °C; IR (KBr): 3223, 1749, 1673, 1602, 1524, 1334, 1181, 1064, 703 cm<sup>-1</sup>; <sup>1</sup>H NMR (500 MHz, CDCl<sub>3</sub> + DMSO-*d*<sub>6</sub>): δ = 0.68 (t, *J* = 6.3 Hz, 3H, CH<sub>3</sub>), 1.43 (d, *J* = 6.0 Hz, 3H, CH<sub>3</sub>), 3.43–3.47 (m, 1H, NCH<sub>2</sub>), 3.52 (s, 1H, CH), 3.59–3.81 (m, 3H, NCH<sub>2</sub> and OCH<sub>2</sub>), 4.18–4.23 (m, 1H, NCH), 6.11 (d, *J* = 7.6 Hz, 1H, ArH), 6.83–6.97 (m, 7H, ArH), 7.07 (d, *J* = 7.3 Hz, 1H, ArH), 8.46 (br, 1H, NH), 9.98 (br, 1H, NH), 10.16 (br, 1H, OH); <sup>13</sup>C NMR (125 MHz, CDCl<sub>3</sub> + DMSO-*d*<sub>6</sub>): δ = 13.5, 20.2, 50.7, 51.5, 52.0, 52.0, 61.2, 83.0 (q, *J* = 30.0 Hz), 86.4, 110.7, 121.7, 122.9, 123.8, 125.6, 127.2, 127.3, 129.0, 132.1, 141.5, 142.0, 160.8, 166.7, 182.8, 192.6; HRMS (TOF ES<sup>+</sup>): *m/z* calcd for C<sub>26</sub>H<sub>25</sub>F<sub>3</sub>N<sub>3</sub>O<sub>5</sub> [(M+H)<sup>+</sup>], 516.1741; found, 516.1740.

**(2*R*,3'*S*,5*R*,6*S*)-ethyl 8-benzoyl-5-hydroxy-2-methyl-2'-oxo-5-(trifluoromethyl)-2,3,5,6-tetrahydro-1*H*-spiro[imidazo[1,2-*a*]pyridine-7,3'-indoline]-6-carboxylate (5*r*')**

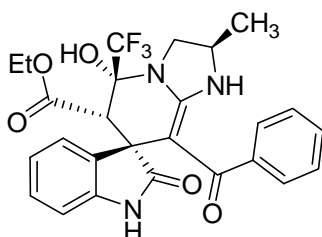

White solid; Mp 169–171 °C; IR (KBr): 3183, 1743, 1681, 1600, 1519, 1333, 1281, 1177, 1017, 754, 695 cm<sup>-1</sup>; <sup>1</sup>H NMR (500 MHz, CDCl<sub>3</sub> + DMSO-*d*<sub>6</sub>): δ = 0.60 (t, *J* = 6.3 Hz, 3H, CH<sub>3</sub>), 1.27 (d, *J* = 6.2 Hz, 3H, CH<sub>3</sub>), 3.19–3.22 (m, 1H, NCH<sub>2</sub>), 3.32 (s, 1H, CH), 3.47–3.93 (m, 3H, NCH<sub>2</sub>, OCH<sub>2</sub>), 4.08–4.12 (m, 1H, NCH), 6.13–6.16 (m, 1H, ArH), 6.59–6.63 (m, 2H, ArH), 6.81–7.01 (m, 5H, ArH), 7.17–7.19 (m, 1H, ArH), 8.38 (br, 1H, NH), 9.65 (br, 1H, OH), 10.56 (br, 1H, NH); <sup>13</sup>C NMR (125 MHz, CDCl<sub>3</sub> + DMSO-*d*<sub>6</sub>): δ = 13.8, 21.8, 50.1, 51.2, 52.1, 52.2, 61.2, 84.2 (q, *J* = 28.8 Hz), 86.2, 110.7, 122.1, 123.0, 124.4, 126.2, 127.5, 127.7, 129.1, 132.6, 142.2, 142.6, 159.6, 166.8, 183.1, 191.2; HRMS (TOF ES<sup>+</sup>): *m/z* calcd for C<sub>26</sub>H<sub>25</sub>F<sub>3</sub>N<sub>3</sub>O<sub>5</sub> [(M+H)<sup>+</sup>], 516.1741; found, 516.1740.



**(2*S*,3'*S*,5*R*,6*S*)-Ethyl 5'-fluoro-5-hydroxy-2-methyl-8-(4-methylbenzoyl)-2'-oxo-5-(trifluoromethyl)-2,3,5,6-tetrahydro-1*H*-spiro[imidazo[1,2-*a*]pyridine-7,3'-indoline]-6-carboxylate (5s)**

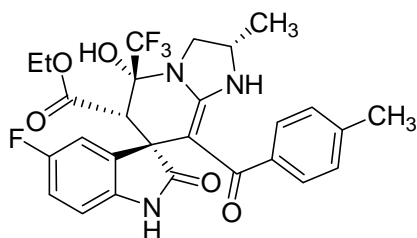

White solid; Mp 218.1–222.7 °C; IR (KBr): 3180, 1744, 1691, 1597, 1495, 1381, 1179, 1014, 706  $\text{cm}^{-1}$ ;  $^1\text{H}$  NMR (500 MHz,  $\text{DMSO-}d_6$ ):  $\delta$  = 0.60–0.63 (m, 3H,  $\text{CH}_3$ ), 1.28–1.32 (m, Hz, 3H,  $\text{CH}_3$ ), 2.18 (s, 3H,  $\text{ArCH}_3$ ), 3.24 (t,  $J$  = 9.7 Hz, 1H,  $\text{NCH}_2$ ), 3.57–3.61 (m, 1H,  $\text{NCH}_2$ ), 3.72–3.76 (m, 3H,  $\text{OCH}_2$  and  $\text{CH}$ ), 4.00–4.04 (m, 1H,  $\text{NCH}$ ), 6.19 (t,  $J$  = 6.2 Hz, 1H,  $\text{ArH}$ ), 6.58–6.62 (m, 2H,  $\text{ArH}$ ), 6.73–6.80 (m, 3H,  $\text{ArH}$ ), 7.29 (d,  $J$  = 7.7 Hz, 1H,  $\text{ArH}$ ), 8.42 (br, 1H,  $\text{NH}$ ), 9.43 (br, 1H,  $\text{OH}$ ), 10.72 (br, 1H,  $\text{NH}$ );  $^{13}\text{C}$  NMR (125 MHz,  $\text{DMSO-}d_6$ ):  $\delta$  = 13.4, 19.9, 21.2, 50.3, 50.9, 51.0, 52.5, 60.8, 83.7 (q,  $J$  = 28.8 Hz), 85.8, 110.8, 112.1 (d,  $J$  = 26.3 Hz), 115.0 (d,  $J$  = 23.8 Hz), 122.8 (d,  $J$  = 286.3 Hz), 125.8, 127.8, 134.1, 137.0, 137.9, 139.4, 158.2, 159.5, 160.1, 166.5; HRMS (TOF  $\text{ES}^+$ ):  $m/z$  calcd for  $\text{C}_{27}\text{H}_{26}\text{F}_4\text{N}_3\text{O}_5$  [ $\text{M}+\text{H}$ ] $^+$ , 548.1803; found, 548.1812.

**(2*R*,3'*S*,5*R*,6*S*)-Ethyl 5'-fluoro-5-hydroxy-2-methyl-8-(4-methylbenzoyl)-2'-oxo-5-(trifluoromethyl)-2,3,5,6-tetrahydro-1*H*-spiro[imidazo[1,2-*a*]pyridine-7,3'-indoline]-6-carboxylate (5s')**

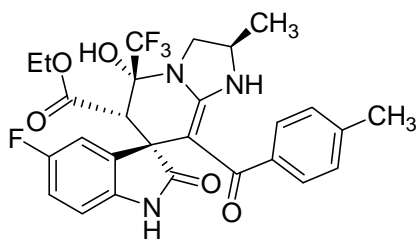

White solid; Mp 217–219 °C; IR (KBr): 3332, 3240, 1739, 1689, 1599, 1500, 1335, 1278, 1177, 1023, 756  $\text{cm}^{-1}$ ;  $^1\text{H}$  NMR (500 MHz,  $\text{DMSO-}d_6$ ):  $\delta$  = 0.60–0.64 (m, 3H,  $\text{CH}_3$ ), 1.22 (d,  $J$  = 4.7 Hz, 3H,  $\text{CH}_3$ ), 2.10 (s, 3H,  $\text{ArCH}_3$ ), 3.16–3.19 (m, 1H,  $\text{NCH}_2$ ), 3.57–3.62 (m, 1H,  $\text{NCH}_2$ ), 3.71–3.87 (m, 3H,  $\text{OCH}_2$  and  $\text{CH}$ ), 4.00–4.04 (m, 1H,  $\text{NCH}$ ), 6.22–6.25 (m, 1H,  $\text{ArH}$ ), 6.67–6.82 (m, 5H,  $\text{ArH}$ ), 7.30 (d,  $J$  = 7.1 Hz, 1H,  $\text{ArH}$ ), 8.29 (br, 1H,  $\text{NH}$ ), 9.11 (br, 1H,  $\text{OH}$ ), 10.71 (br, 1H,  $\text{NH}$ );  $^{13}\text{C}$  NMR (125 MHz,  $\text{DMSO-}d_6$ ):  $\delta$  = 13.4, 21.2, 21.2, 49.6, 50.7, 50.8, 52.4, 60.8, 83.7 (q,  $J$  = 30.0 Hz), 85.6, 110.7, 112.0 (q,  $J$  = 25.0 Hz), 114.9 (q,  $J$  = 23.8 Hz), 122.8 (q,  $J$  = 286.3 Hz),

126.2, 127.8, 134.2, 137.4, 138.1, 139.3, 158.2, 158.6, 160.0, 166.5, 182.8, 190.3;  
HRMS (TOF ES<sup>+</sup>): *m/z* calcd for C<sub>27</sub>H<sub>26</sub>F<sub>4</sub>N<sub>3</sub>O<sub>5</sub> [(M+H)<sup>+</sup>], 548.1803; found,  
548.1813.

**(2*S*,3'*S*,5*R*,6*S*)-Ethyl 5'-chloro-5-hydroxy-2-methyl-8-(4-methylbenzoyl)-2'-oxo-5-(trifluoromethyl)-2,3,5,6-tetrahydro-1*H*-spiro[imidazo[1,2-*a*]pyridine-7,3'-indoline]-6-carboxylate (5t)**

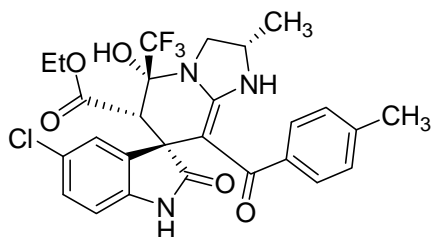

White solid; Mp 213–216.5 °C; IR (KBr): 3162, 1743, 1692, 1597, 1493, 1382, 1327, 1177, 1014, 705 cm<sup>-1</sup>; <sup>1</sup>H NMR (500 MHz, DMSO-*d*<sub>6</sub>): δ = 0.61 (t, *J* = 6.6 Hz, 3H, CH<sub>3</sub>), 1.28 (d, *J* = 3.6 Hz, 3H, CH<sub>3</sub>), 2.17 (s, 3H, ArCH<sub>3</sub>), 3.24 (t, *J* = 9.7 Hz, 1H, CH<sub>2</sub>), 3.57–3.63 (m, 1H, NCH<sub>2</sub>), 3.72–3.76 (m, 2H, OCH<sub>2</sub>), 3.78 (s, 1H, CH), 3.99–4.03 (m, 1H, NCH), 6.20–6.23 (m, 1H, ArH), 6.58–6.62 (m, 2H, ArH), 6.78–6.82 (m, 2H, ArH), 6.96 (d, *J* = 8.1 Hz, 1H, ArH), 7.46 (s, 1H, ArH), 8.28 (br, 1H, NH), 9.30 (br, 1H, OH), 10.79 (br, 1H, NH); <sup>13</sup>C NMR (125 MHz, DMSO-*d*<sub>6</sub>): δ = 13.4, 20.0, 21.2, 50.4, 50.8, 51.0, 52.3, 60.8, 83.6 (q, *J* = 20.0 Hz), 85.7, 111.3, 124.5, 126.0, 126.9, 122.8 (q, *J* = 287.5 Hz), 128.4, 128.9, 134.4, 137.1, 139.4, 140.6, 159.4, 166.5, 182.5, 190.6; HRMS (TOF ES<sup>+</sup>): *m/z* calcd for C<sub>27</sub>H<sub>26</sub>ClF<sub>3</sub>N<sub>3</sub>O<sub>5</sub> [(M+H)<sup>+</sup>], 564.1508; found, 564.1514.

**(2*R*,3'*S*,5*R*,6*S*)-Ethyl 5'-chloro-5-hydroxy-2-methyl-8-(4-methylbenzoyl)-2'-oxo-5-(trifluoromethyl)-2,3,5,6-tetrahydro-1*H*-spiro[imidazo[1,2-*a*]pyridine-7,3'-indoline]-6-carboxylate (5t')**

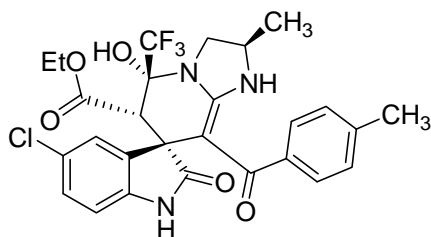

White solid; Mp 182–185 °C; IR (KBr): 3162, 1743, 1692, 1597, 1493, 1382, 1327, 1177, 1014, 705 cm<sup>-1</sup>; <sup>1</sup>H NMR (500 MHz, DMSO-*d*<sub>6</sub>): δ = 0.61 (t, *J* = 5.3 Hz, 3H, CH<sub>3</sub>), 1.28–1.30 (m, 3H, CH<sub>3</sub>), 2.18 (s, 3H, CH<sub>3</sub>), 3.21–3.25 (m, 1H, NCH<sub>2</sub>), 3.59–3.63 (m, 1H, NCH<sub>2</sub>), 3.72–3.78 (m, 2H, OCH<sub>2</sub>), 3.78 (s, 1H, CH), 4.00–4.04 (m, 1H, NCH), 6.20–6.23 (m, 1H, ArH), 6.58–6.80 (m, 4H, ArH), 6.97 (d, *J* = 8.2 Hz, 1H,

ArH), 7.47(s, 1H, ArH), 8.28 (br, 1H, NH), 9.27 (br, 1H, OH), 10.79 (br, 1H, NH);  $^{13}\text{C}$  NMR (125 MHz, DMSO- $d_6$ ):  $\delta$  = 13.4, 20.0, 21.2, 50.4, 50.8, 51.0, 52.3, 60.8, 83.6 (q,  $J$  = 30.0 Hz), 85.7, 111.3, 122.8 (q,  $J$  = 286.3 Hz), 124.6, 126.0, 126.9, 127.8, 128.4, 134.4, 137.1, 139.4, 140.7, 159.4, 166.6, 182.6, 190.6; HRMS (TOF ES $^+$ ):  $m/z$  calcd for  $\text{C}_{27}\text{H}_{26}\text{ClF}_3\text{N}_3\text{O}_5$  [(M+H) $^+$ ], 564.1508; found, 564.1503.

**(2*S*,3'*S*,5*R*,6*S*)-Ethyl 5-hydroxy-2-methyl-8-(4-methylbenzoyl)-2'-oxo-5-(trifluoromethyl)-2,3,5,6-tetrahydro-1*H*-spiro[imidazo[1,2-*a*]pyridine-7,3'-indoline]-6-carboxylate (5u)**

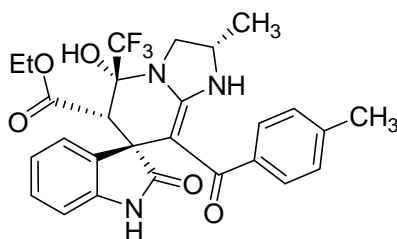

White solid; Mp 213–216.5 °C; IR (KBr): 3312, 3187, 1734, 1690, 1600, 1337, 1178, 1017, 759  $\text{cm}^{-1}$ ;  $^1\text{H}$  NMR (500 MHz, DMSO- $d_6$ ):  $\delta$  = 0.54–0.58 (m, 3H, CH $_3$ ), 1.27–1.31 (m, 3H, CH $_3$ ), 2.08 (s, 3H, CH $_3$ ), 3.22 (d,  $J$  = 9.9 Hz, 1H, CH $_2$ ), 3.54–3.63 (m, 1H, NCH $_2$ ), 3.72–3.75 (m, 2H, OCH $_2$ ), 3.78 (s, 1H, CH), 4.00–4.04 (m, 1H, NCH), 6.18–6.22 (m, 1H, ArH), 6.51–6.55 (m, 2H, ArH), 6.72–6.75 (m, 2H, ArH), 6.85–6.93 (m, 2H, ArH), 7.22 (d,  $J$  = 8.1 Hz, 1H, ArH), 8.50 (br, 1H, NH), 9.41 (br, 1H, OH), 10.61 (br, 1H, NH);  $^{13}\text{C}$  NMR (125 MHz, DMSO- $d_6$ ):  $\delta$  = 13.4, 20.0, 21.2, 50.2, 50.4, 51.4, 51.9, 60.8, 83.7 (q,  $J$  = 30.0 Hz), 86.0, 111.0, 121.7, 122.6, 124.0, 125.8, 127.6, 128.7, 128.8, 132.3, 139.5, 141.8, 159.4, 166.5, 182.6, 191.1; HRMS (TOF ES $^+$ ):  $m/z$  calcd for  $\text{C}_{27}\text{H}_{27}\text{F}_3\text{N}_3\text{O}_5$  [(M+H) $^+$ ], 530.1897; found, 530.1889.

**(2*R*,3'*S*,5*R*,6*S*)-Ethyl 5-hydroxy-2-methyl-8-(4-methylbenzoyl)-2'-oxo-5-(trifluoromethyl)-2,3,5,6-tetrahydro-1*H*-spiro[imidazo[1,2-*a*]pyridine-7,3'-indoline]-6-carboxylate (5u')**

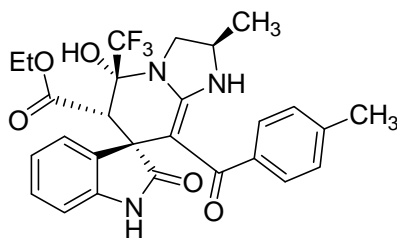

White solid; Mp 182–185 °C; IR (KBr): 3203, 1744, 1684, 1600, 1504, 1174, 1018, 755  $\text{cm}^{-1}$ ;  $^1\text{H}$  NMR (500 MHz, DMSO- $d_6$ ):  $\delta$  = 0.66 (t,  $J$  = 7.1 Hz, 3H, CH $_3$ ), 1.28 (t,  $J$  = 4.1 Hz, 3H, CH $_3$ ), 2.14 (s, 3H, CH $_3$ ), 3.15–3.24 (m, 1H, NCH $_2$ ), 3.49–3.83 (m, 4H, NCH $_2$ , OCH $_2$  and CH), 4.01–4.05 (m, 1H, NCH), 6.14–6.20 (m, 1H, ArH), 6.50–6.55

(m, 2H, ArH), 6.80–6.94 (m, 4H, ArH), 7.16 (d,  $J = 7.4$  Hz, 1H, ArH), 8.38 (br, 1H, NH), 9.14 (br, 1H, OH), 10.62 (br, 1H, NH);  $^{13}\text{C}$  NMR (125 MHz, DMSO- $d_6$ ):  $\delta = 13.8, 21.7, 49.9, 50.0, 51.2, 51.9, 52.4, 61.2, 84.2$  (q,  $J = 28.8$  Hz), 86.3, 110.5, 122.2, 123.0, 124.5, 126.7, 128.2, 129.1, 132.8, 137.6, 139.9, 142.3, 159.0, 167.0, 183.2, 191.1; HRMS (TOF ES $^+$ ):  $m/z$  calcd for  $\text{C}_{27}\text{H}_{27}\text{F}_3\text{N}_3\text{O}_5$  [(M+H) $^+$ ], 530.1897; found, 530.1889.

**(2*S*,3'*S*,5*R*,6*S*)-Ethyl 5'-fluoro-5-hydroxy-8-(4-methoxybenzoyl)-2-methyl-2'-oxo-5-(trifluoromethyl)-2,3,5,6-tetrahydro-1*H*-spiro[imidazo[1,2-*a*]pyridine-7,3'-indoline]-6-carboxylate (5*v*)**

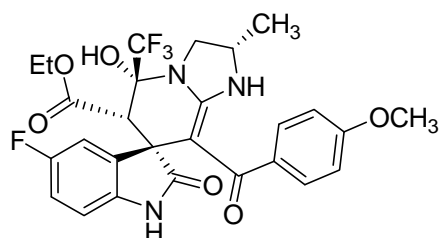

White solid; Mp 215–217 °C; IR (KBr): 3189, 1743, 1688, 1595, 1494, 1380, 1247, 1176, 1023, 710  $\text{cm}^{-1}$ ;  $^1\text{H}$  NMR (500 MHz, DMSO- $d_6$ ):  $\delta = 0.63$  (t,  $J = 6.7$  Hz, 3H, CH $_3$ ), 1.20 (t,  $J = 3.7$  Hz, 3H, CH $_3$ ), 3.22 (t,  $J = 9.7$  Hz, 1H, NCH $_2$ ), 3.53–3.82 (m, 4H, NCH $_2$ , OCH $_2$  and CH), 3.69 (s, 3H, OCH $_3$ ), 3.96–3.99 (m, 1H, NCH), 6.29 (t,  $J = 4.0$  Hz, 1H, ArH), 6.59 (d,  $J = 4.9$  Hz, 2H, ArH), 6.75–6.79 (m, 3H, ArH), 7.29 (d,  $J = 8.2$  Hz, 1H, ArH), 8.40 (br, 1H, NH), 8.95 (br, 1H, OH), 10.73 (br, 1H, NH);  $^{13}\text{C}$  NMR (125 MHz, DMSO- $d_6$ ):  $\delta = 13.4, 19.9, 50.2, 50.4, 51.0, 52.6, 55.5, 60.8, 83.8, 85.8, 110.8, 111.8$  (d,  $J = 25.0$  Hz), 113.0, 115.0 (d,  $J = 23.8$  Hz), 122.8, 127.8, 134.3, 134.7, 138.0 (d,  $J = 18.8$  Hz), 158.9 (d,  $J = 22.5$  Hz), 159.3, 160.1, 166.5, 182.7, 190.4; HRMS (TOF ES $^+$ ):  $m/z$  calcd for  $\text{C}_{27}\text{H}_{26}\text{F}_4\text{N}_3\text{O}_6$  [(M+H) $^+$ ], 564.1752; found, 564.1753.

**(2*R*,3'*S*,5*R*,6*S*)-Ethyl 5'-fluoro-5-hydroxy-8-(4-methoxybenzoyl)-2-methyl-2'-oxo-5-(trifluoromethyl)-2,3,5,6-tetrahydro-1*H*-spiro[imidazo[1,2-*a*]pyridine-7,3'-indoline]-6-carboxylate (5*v*')**

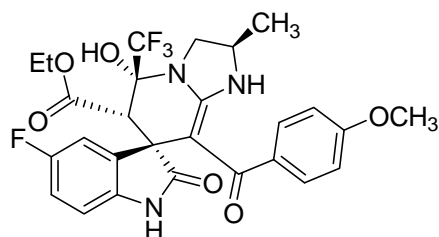

White solid; Mp 209–213 °C; IR (KBr): 3248, 1741, 1690, 1600, 1495, 1287, 1174, 1022, 819, 694  $\text{cm}^{-1}$ ;  $^1\text{H}$  NMR (500 MHz, DMSO- $d_6$ ):  $\delta = 0.60$ – $0.64$  (m, 3H, CH $_3$ ),

1.17 (d,  $J = 5.8$  Hz, 3H, CH<sub>3</sub>), 3.15–3.19 (m, 1H, NCH<sub>2</sub>), 3.60–3.88 (m, 5H, NCH<sub>2</sub>CHN, OCH<sub>2</sub> and CH), 3.67 (s, 3H, OCH<sub>3</sub>), 6.32–6.37 (m, 1H, ArH), 6.75–6.80 (m, 3H, ArH), 7.22 (d,  $J = 6.5$  Hz, 1H, ArH), 8.28 (br, 1H, NH), 10.80 (br, 1H, NH); <sup>13</sup>C NMR (125 MHz, DMSO-*d*<sub>6</sub>):  $\delta = 13.3, 21.0, 49.5, 50.7, 51.0, 52.6, 55.4, 60.9, 83.6$  (q,  $J = 30.0$  Hz), 85.7, 111.6 (q,  $J = 25.0$  Hz), 112.8, 113.0, 114.9 (q,  $J = 23.8$  Hz), 122.8 (q,  $J = 286.3$  Hz), 123.9, 134.2 (q,  $J = 8.8$  Hz), 134.4, 138.1, 158.2 (q,  $J = 22.5$  Hz), 159.6, 160.0, 166.6, 182.9, 190.0; HRMS (TOF ES<sup>+</sup>):  $m/z$  calcd for C<sub>27</sub>H<sub>26</sub>F<sub>4</sub>N<sub>3</sub>O<sub>6</sub> [(M+H)<sup>+</sup>], 564.1752; found, 564.1740.

**(2*S*,3'*S*,5*R*,6*S*)-Ethyl 5'-chloro-5-hydroxy-8-(4-methoxybenzoyl)-2-methyl-2'-oxo-5-(trifluoromethyl)-2,3,5,6-tetrahydro-1*H*-spiro[imidazo[1,2-*a*]pyridine-7,3'-indoline]-6-carboxylate (5w)**

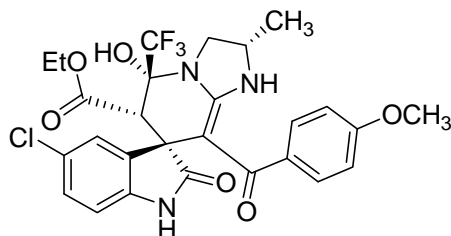

White solid; Mp 205–209 °C; IR (KBr): 3162, 1743, 1692, 1597, 1492, 1382, 1283, 1172, 1013, 660 cm<sup>-1</sup>; <sup>1</sup>H NMR (500 MHz, DMSO-*d*<sub>6</sub>):  $\delta = 0.63$  (t,  $J = 6.7$  Hz, 3H, CH<sub>3</sub>), 1.26 (d,  $J = 5.8$  Hz, 3H, CH<sub>3</sub>), 3.22 (t,  $J = 9.6$  Hz, 2H, NCH<sub>2</sub>), 3.60–3.83 (m, 4H, NCH<sub>2</sub>, OCH<sub>2</sub> and CH), 3.70 (s, 3H, OCH<sub>3</sub>), 3.97–4.02 (m, 1H, NCH), 6.32 (d,  $J = 8.2$  Hz, 1H, ArH), 6.58–6.61 (m, 2H, ArH), 6.74–6.78 (m, 2H, ArH), 6.98–7.00 (m, 1H, ArH), 7.46 (s, 1H, ArH), 8.27 (br, 1H, NH), 8.77 (br, 1H, OH), 10.83 (br, 1H, NH); <sup>13</sup>C NMR (125 MHz, DMSO-*d*<sub>6</sub>):  $\delta = 13.4, 20.0, 50.4, 50.8, 51.0, 52.5, 55.5, 60.8, 83.7$  (q,  $J = 28.8$  Hz), 85.8, 111.3, 113.1, 124.3, 126.9, 128.0, 128.5, 134.5, 134.7, 140.9, 159.0, 159.4, 166.6, 182.7, 190.2; HRMS (TOF ES<sup>+</sup>):  $m/z$  calcd for C<sub>27</sub>H<sub>26</sub>ClF<sub>3</sub>N<sub>3</sub>O<sub>6</sub> [(M+H)<sup>+</sup>], 580.1457; found, 580.1483.

**(2*R*,3'*S*,5*R*,6*S*)-Ethyl 5'-chloro-5-hydroxy-8-(4-methoxybenzoyl)-2-methyl-2'-oxo-5-(trifluoromethyl)-2,3,5,6-tetrahydro-1*H*-spiro[imidazo[1,2-*a*]pyridine-7,3'-indoline]-6-carboxylate (5w')**

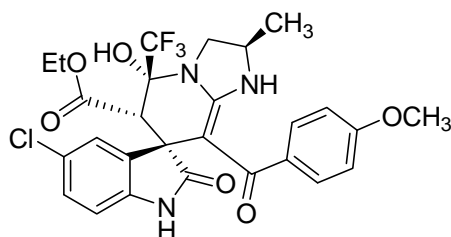

White solid; Mp 214–216 °C; IR (KBr): 3162, 1743, 1692, 1597, 1491, 1382, 1326,

1177, 1013, 660  $\text{cm}^{-1}$ ;  $^1\text{H}$  NMR (500 MHz,  $\text{DMSO-}d_6$ ):  $\delta$  = 0.65 (t,  $J$  = 6.7 Hz, 3H,  $\text{CH}_3$ ), 1.20 (t,  $J$  = 5.8 Hz, 3H,  $\text{CH}_3$ ), 3.14–3.17 (m, 1H,  $\text{NCH}_2$ ), 3.60–3.84 (m, 4H,  $\text{NCH}_2$ ,  $\text{OCH}_2$  and CH), 3.71 (s, 3H,  $\text{OCH}_3$ ), 3.94–3.98 (m, 1H, NCH), 6.39 (d,  $J$  = 8.2 Hz, 1H, ArH), 6.63–6.66 (m, 2H, ArH), 6.87–6.90 (m, 2H, ArH), 7.01 (d,  $J$  = 8.2 Hz, 1H, ArH), 7.49 (s, 1H, ArH), 8.18 (br, 1H, NH), 8.38 (br, 1H, OH), 10.84 (br, 1H, NH);  $^{13}\text{C}$  NMR (125 MHz,  $\text{DMSO-}d_6$ ):  $\delta$  = 13.4, 21.1, 49.5, 50.8, 50.9, 52.5, 55.5, 60.7, 83.7 (q,  $J$  = 31.3 Hz), 85.6, 111.3, 113.1, 124.0, 124.2, 126.9, 128.4, 128.5, 134.5, 134.6, 141.1, 158.0, 159.8, 166.6, 182.7, 189.6; HRMS (TOF  $\text{ES}^+$ ):  $m/z$  calcd for  $\text{C}_{27}\text{H}_{26}\text{ClF}_3\text{N}_3\text{O}_6$   $[(\text{M}+\text{H})^+]$ , 580.1457; found, 580.1457.

**(2*S*,3'*S*,5*R*,6*S*)-Ethyl 5-hydroxy-8-(4-methoxybenzoyl)-2-methyl-2'-oxo-5-(trifluoromethyl)-2,3,5,6-tetrahydro-1*H*-spiro[imidazo[1,2-*a*]pyridine-7,3'-indoline]-6-carboxylate (5x)**

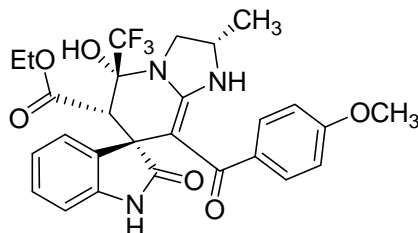

White solid; Mp 200–203 °C; IR (KBr): 3252, 3183, 1742, 1681, 1601, 1517, 1287, 1174, 1024, 752  $\text{cm}^{-1}$ ;  $^1\text{H}$  NMR (500 MHz,  $\text{DMSO-}d_6$ ):  $\delta$  = 0.57–0.61 (m, 3H,  $\text{CH}_3$ ), 1.20 (d,  $J$  = 5.9 Hz 3H,  $\text{CH}_3$ ), 3.16–3.19 (m, 1H,  $\text{NCH}_2$ ), 3.55–3.67 (m, 2H,  $\text{NCH}_2$  and CH), 3.68 (s, 3H,  $\text{OCH}_3$ ), 3.80–3.85 (m, 2H,  $\text{OCH}_2$ ), 3.97–4.01 (m, 1H, NCH), 6.22–6.26 (m, 1H, ArH), 6.33–6.37 (m, 3H, ArH), 6.75–6.78 (m, 2H, ArH), 6.86–6.90 (m, 1H, ArH), 6.94–6.96 (m, 1H, ArH), 7.22 (d,  $J$  = 7.2 Hz, 1H, ArH), 8.29 (br, 1H, NH), 8.63 (br, 1H, OH), 10.71 (br, 1H, NH);  $^{13}\text{C}$  NMR (125 MHz,  $\text{DMSO-}d_6$ ):  $\delta$  = 13.4, 21.2, 49.4, 50.7, 51.4, 52.1, 55.4, 60.7, 83.8 (q,  $J$  = 30.0 Hz), 85.9, 110.0, 112.9, 122.6, 123.7, 128.1, 128.3, 128.6, 132.3, 134.6, 142.0, 158.2, 159.4, 166.5, 182.8, 190.2; HRMS (TOF  $\text{ES}^+$ ):  $m/z$  calcd for  $\text{C}_{27}\text{H}_{27}\text{F}_3\text{N}_3\text{O}_6$   $[(\text{M}+\text{H})^+]$ , 546.1846; found, 546.1855.

**(2*R*,3'*S*,5*R*,6*S*)-Ethyl 5-hydroxy-8-(4-methoxybenzoyl)-2-methyl-2'-oxo-5-(trifluoromethyl)-2,3,5,6-tetrahydro-1*H*-spiro[imidazo[1,2-*a*]pyridine-7,3'-indoline]-6-carboxylate (5x')**

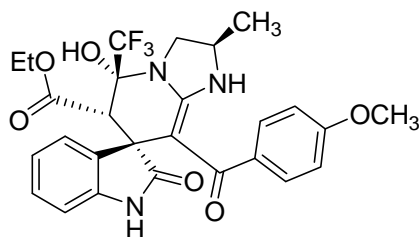

White solid; Mp 205–207 °C; IR (KBr): 3206, 1738, 1685, 1596, 1498, 1248, 1174, 1025, 714  $\text{cm}^{-1}$ ;  $^1\text{H}$  NMR (500 MHz,  $\text{DMSO-}d_6$ ):  $\delta$  = 0.58–0.65 (m, 3H,  $\text{CH}_3$ ), 1.28 (d,  $J$  = 5.8 Hz, 3H,  $\text{CH}_3$ ), 3.17–3.24 (m, 1H,  $\text{NCH}_2$ ), 3.58–3.81 (m, 4H,  $\text{NCH}_2$ ,  $\text{OCH}_2$  and CH), 3.68 (s, 3H,  $\text{OCH}_3$ ), 3.99–4.04 (m, 1H,  $\text{NCH}$ ), 6.28 (d,  $J$  = 7.5 Hz, 1H, ArH), 6.51–6.55 (m, 3H, ArH), 6.64–6.68 (m, 2H, ArH), 6.86–6.90 (m, 1H, ArH), 6.92–6.96 (m, 1H, ArH), 7.22 (d,  $J$  = 7.2 Hz, 1H, ArH), 8.50 (br, 1H, NH), 8.98 (br, 1H, OH), 10.67 (br, 1H, NH);  $^{13}\text{C}$  NMR (125 MHz,  $\text{DMSO-}d_6$ ):  $\delta$  = 13.4, 19.9, 50.3, 51.1, 51.3, 52.1, 55.4, 60.7, 83.8, 86.1, 110.1, 112.9, 122.7, 122.8, 123.8, 127.7, 128.7, 132.3, 134.8, 141.9, 159.1, 159.1, 166.5, 182.8, 190.7; HRMS (TOF  $\text{ES}^+$ ):  $m/z$  calcd for  $\text{C}_{27}\text{H}_{27}\text{F}_3\text{N}_3\text{O}_6$   $[(\text{M}+\text{H})^+]$ , 546.1846; found, 546.1856.

### X-ray Structure and Data<sup>2</sup> of 5r

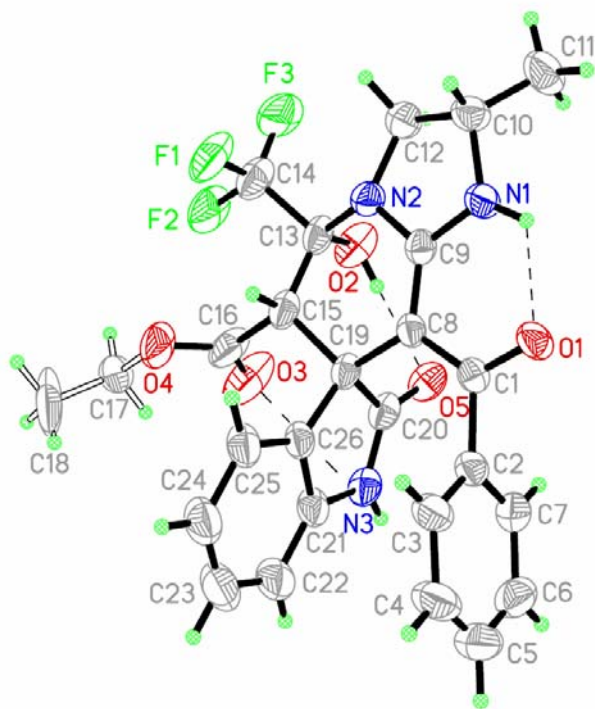

**Figure S1** X-Ray crystal structure of **5r**

**Table S1** Crystal data and structure refinement for 100903A

|                                   |                                                                                                                             |
|-----------------------------------|-----------------------------------------------------------------------------------------------------------------------------|
| Empirical formula                 | C <sub>26</sub> H <sub>24</sub> F <sub>3</sub> N <sub>3</sub> O <sub>5</sub>                                                |
| Formula weight                    | 515.48                                                                                                                      |
| Temperature                       | 298(2) K                                                                                                                    |
| Wavelength                        | 0.71073 Å                                                                                                                   |
| Crystal system, space group       | Monoclinic, P2(1)/n                                                                                                         |
| Unit cell dimensions              | a = 8.941(2) Å      alpha = 90 deg.<br>b = 22.201(4) Å      beta = 111.357(10) deg.<br>c = 12.975(2) Å      gamma = 90 deg. |
| Volume                            | 2398.6(8) Å <sup>3</sup>                                                                                                    |
| Z, Calculated density             | 4, 1.427 Mg/m <sup>3</sup>                                                                                                  |
| Absorption coefficient            | 0.115 mm <sup>-1</sup>                                                                                                      |
| F(000)                            | 1072                                                                                                                        |
| Crystal size                      | 0.23x 0.19 x 0.14 mm                                                                                                        |
| Theta range for data collection   | 1.83 to 28.26 deg.                                                                                                          |
| Limiting indices                  | -11<=h<=11, -20<=k<=28, -17<=l<=17                                                                                          |
| Reflection collected/unique       | 16431/5607[R(int) = 0.0607]                                                                                                 |
| Completeness to theta = 28.2      | 94.6%                                                                                                                       |
| Absorption correction             | Semi-empirical from equivalents                                                                                             |
| Refinement method                 | Full-matrix least-squares on F <sup>2</sup>                                                                                 |
| Data/restraints/parameters        | 5607/ 0/ 358                                                                                                                |
| Goodness-of-fit on F <sup>2</sup> | 1.041                                                                                                                       |
| Final R indices [I>2sigma(I)]     | R1 = 0.0702, wR2 = 0.1663                                                                                                   |
| R indices (all data)              | R1 = 0.1847, wR2 = 0.2182                                                                                                   |
| Extinction                        | coefficient                                                                                                                 |
| Largest diff. peak and hole       | 0.339 and -0.353 e.Å <sup>-3</sup>                                                                                          |

**Table S2** Bond lengths [Å] and angles [deg] for 100903A

|           |          |
|-----------|----------|
| C(1)-O(1) | 1.252(4) |
| C(1)-C(8) | 1.433(4) |
| C(1)-C(2) | 1.501(4) |
| C(2)-C(7) | 1.383(5) |
| C(2)-C(3) | 1.394(5) |
| C(3)-C(4) | 1.376(5) |
| C(3)-H(3) | 0.9300   |
| C(4)-C(5) | 1.367(6) |
| C(4)-H(4) | 0.9300   |



---

|              |           |
|--------------|-----------|
| C(5)-C(6)    | 1.368(6)  |
| C(5)-H(5)    | 0.9300    |
| C(6)-C(7)    | 1.396(5)  |
| C(6)-H(6)    | 0.9300    |
| C(7)-H(7)    | 0.9300    |
| C(8)-C(9)    | 1.392(4)  |
| C(8)-C(19)   | 1.524(4)  |
| C(9)-N(1)    | 1.326(4)  |
| C(9)-N(2)    | 1.380(4)  |
| C(10)-N(1)   | 1.461(4)  |
| C(10)-C(11)  | 1.482(5)  |
| C(10)-C(12)  | 1.524(5)  |
| C(10)-H(10)  | 0.9800    |
| C(11)-H(11A) | 0.9600    |
| C(11)-H(11B) | 0.9600    |
| C(11)-H(11C) | 0.9600    |
| C(12)-N(2)   | 1.470(4)  |
| C(12)-H(12A) | 0.9700    |
| C(12)-H(12B) | 0.9700    |
| C(13)-O(2)   | 1.401(4)  |
| C(13)-N(2)   | 1.459(4)  |
| C(13)-C(15)  | 1.525(5)  |
| C(13)-C(14)  | 1.527(5)  |
| C(14)-F(3)   | 1.322(5)  |
| C(14)-F(2)   | 1.330(4)  |
| C(14)-F(1)   | 1.338(5)  |
| C(15)-C(16)  | 1.517(5)  |
| C(15)-C(19)  | 1.557(5)  |
| C(15)-H(15)  | 0.9800    |
| C(16)-O(3)   | 1.189(5)  |
| C(16)-O(4)   | 1.318(6)  |
| C(17)-C(18)  | 1.32(3)   |
| C(17)-O(4)   | 1.542(16) |
| C(17)-H(17A) | 0.9700    |
| C(17)-H(17B) | 0.9700    |
| C(18)-H(18A) | 0.9600    |
| C(18)-H(18B) | 0.9600    |
| C(18)-H(18C) | 0.9600    |
| C(19)-C(26)  | 1.509(5)  |
| C(19)-C(20)  | 1.561(4)  |

---

---

|                |           |
|----------------|-----------|
| C(20)-O(5)     | 1.223(4)  |
| C(20)-N(3)     | 1.352(4)  |
| C(21)-C(22)    | 1.378(5)  |
| C(21)-C(26)    | 1.391(4)  |
| C(21)-N(3)     | 1.405(4)  |
| C(22)-C(23)    | 1.386(6)  |
| C(22)-H(22)    | 0.9300    |
| C(23)-C(24)    | 1.357(6)  |
| C(23)-H(23)    | 0.9300    |
| C(24)-C(25)    | 1.398(6)  |
| C(24)-H(24)    | 0.9300    |
| C(25)-C(26)    | 1.375(4)  |
| C(25)-H(25)    | 0.9300    |
| C(17')-C(18')  | 1.40(3)   |
| C(17')-O(4)    | 1.696(14) |
| C(17')-H(17C)  | 0.9700    |
| C(17')-H(17D)  | 0.9700    |
| C(18')-H(18D)  | 0.9600    |
| C(18')-H(18E)  | 0.9600    |
| C(18')-H(18F)  | 0.9600    |
| N(1)-H(1)      | 0.8600    |
| N(3)-H(3A)     | 0.8600    |
| O(2)-H(2)      | 0.8200    |
| O(1)-C(1)-C(8) | 123.1(3)  |
| O(1)-C(1)-C(2) | 115.3(3)  |
| C(8)-C(1)-C(2) | 121.6(3)  |
| C(7)-C(2)-C(3) | 119.0(4)  |
| C(7)-C(2)-C(1) | 120.1(3)  |
| C(3)-C(2)-C(1) | 120.7(3)  |
| C(4)-C(3)-C(2) | 120.3(4)  |
| C(4)-C(3)-H(3) | 119.9     |
| C(2)-C(3)-H(3) | 119.9     |
| C(5)-C(4)-C(3) | 120.3(5)  |
| C(5)-C(4)-H(4) | 119.8     |
| C(3)-C(4)-H(4) | 119.8     |
| C(4)-C(5)-C(6) | 120.6(5)  |
| C(4)-C(5)-H(5) | 119.7     |
| C(6)-C(5)-H(5) | 119.7     |
| C(5)-C(6)-C(7) | 119.8(4)  |
| C(5)-C(6)-H(6) | 120.1     |

---

---

|                     |          |
|---------------------|----------|
| C(7)-C(6)-H(6)      | 120.1    |
| C(2)-C(7)-C(6)      | 120.0(4) |
| C(2)-C(7)-H(7)      | 120.0    |
| C(6)-C(7)-H(7)      | 120.0    |
| C(9)-C(8)-C(1)      | 118.1(3) |
| C(9)-C(8)-C(19)     | 118.4(3) |
| C(1)-C(8)-C(19)     | 122.8(3) |
| N(1)-C(9)-N(2)      | 108.4(3) |
| N(1)-C(9)-C(8)      | 126.8(3) |
| N(2)-C(9)-C(8)      | 124.8(3) |
| N(1)-C(10)-C(11)    | 113.7(3) |
| N(1)-C(10)-C(12)    | 100.6(3) |
| C(11)-C(10)-C(12)   | 114.5(3) |
| N(1)-C(10)-H(10)    | 109.2    |
| C(11)-C(10)-H(10)   | 109.2    |
| C(12)-C(10)-H(10)   | 109.2    |
| C(10)-C(11)-H(11A)  | 109.5    |
| C(10)-C(11)-H(11B)  | 109.5    |
| H(11A)-C(11)-H(11B) | 109.5    |
| C(10)-C(11)-H(11C)  | 109.5    |
| H(11A)-C(11)-H(11C) | 109.5    |
| H(11B)-C(11)-H(11C) | 109.5    |
| N(2)-C(12)-C(10)    | 103.2(3) |
| N(2)-C(12)-H(12A)   | 111.1    |
| C(10)-C(12)-H(12A)  | 111.1    |
| N(2)-C(12)-H(12B)   | 111.1    |
| C(10)-C(12)-H(12B)  | 111.1    |
| H(12A)-C(12)-H(12B) | 109.1    |
| O(2)-C(13)-N(2)     | 112.9(3) |
| O(2)-C(13)-C(15)    | 114.9(3) |
| N(2)-C(13)-C(15)    | 106.5(3) |
| O(2)-C(13)-C(14)    | 103.3(3) |
| N(2)-C(13)-C(14)    | 108.5(3) |
| C(15)-C(13)-C(14)   | 110.6(3) |
| F(3)-C(14)-F(2)     | 105.8(4) |
| F(3)-C(14)-F(1)     | 107.3(4) |
| F(2)-C(14)-F(1)     | 106.4(4) |
| F(3)-C(14)-C(13)    | 114.3(4) |
| F(2)-C(14)-C(13)    | 111.5(4) |
| F(1)-C(14)-C(13)    | 111.1(4) |

---

---

|                     |          |
|---------------------|----------|
| C(16)-C(15)-C(13)   | 112.8(4) |
| C(16)-C(15)-C(19)   | 110.1(3) |
| C(13)-C(15)-C(19)   | 114.7(3) |
| C(16)-C(15)-H(15)   | 106.2    |
| C(13)-C(15)-H(15)   | 106.2    |
| C(19)-C(15)-H(15)   | 106.2    |
| O(3)-C(16)-O(4)     | 124.6(4) |
| O(3)-C(16)-C(15)    | 124.2(5) |
| O(4)-C(16)-C(15)    | 110.9(4) |
| C(18)-C(17)-O(4)    | 109(2)   |
| C(18)-C(17)-H(17A)  | 109.8    |
| O(4)-C(17)-H(17A)   | 109.8    |
| C(18)-C(17)-H(17B)  | 109.8    |
| O(4)-C(17)-H(17B)   | 109.8    |
| H(17A)-C(17)-H(17B) | 108.2    |
| C(17)-C(18)-H(18A)  | 109.5    |
| C(17)-C(18)-H(18B)  | 109.5    |
| H(18A)-C(18)-H(18B) | 109.5    |
| C(17)-C(18)-H(18C)  | 109.5    |
| H(18A)-C(18)-H(18C) | 109.5    |
| H(18B)-C(18)-H(18C) | 109.5    |
| C(26)-C(19)-C(8)    | 118.6(3) |
| C(26)-C(19)-C(15)   | 106.1(3) |
| C(8)-C(19)-C(15)    | 110.0(3) |
| C(26)-C(19)-C(20)   | 101.2(3) |
| C(8)-C(19)-C(20)    | 108.7(3) |
| C(15)-C(19)-C(20)   | 112.0(2) |
| O(5)-C(20)-N(3)     | 125.6(3) |
| O(5)-C(20)-C(19)    | 126.3(4) |
| N(3)-C(20)-C(19)    | 107.9(3) |
| C(22)-C(21)-C(26)   | 122.8(4) |
| C(22)-C(21)-N(3)    | 128.1(3) |
| C(26)-C(21)-N(3)    | 109.1(3) |
| C(21)-C(22)-C(23)   | 117.2(4) |
| C(21)-C(22)-H(22)   | 121.4    |
| C(23)-C(22)-H(22)   | 121.4    |
| C(24)-C(23)-C(22)   | 121.3(5) |
| C(24)-C(23)-H(23)   | 119.4    |
| C(22)-C(23)-H(23)   | 119.4    |
| C(23)-C(24)-C(25)   | 121.1(4) |

---

|                      |          |
|----------------------|----------|
| C(23)-C(24)-H(24)    | 119.5    |
| C(25)-C(24)-H(24)    | 119.5    |
| C(26)-C(25)-C(24)    | 118.9(3) |
| C(26)-C(25)-H(25)    | 120.5    |
| C(24)-C(25)-H(25)    | 120.5    |
| C(25)-C(26)-C(21)    | 118.8(3) |
| C(25)-C(26)-C(19)    | 131.6(3) |
| C(21)-C(26)-C(19)    | 109.5(3) |
| C(18')-C(17')-O(4)   | 83.7(13) |
| C(18')-C(17')-H(17C) | 114.7    |
| O(4)-C(17')-H(17C)   | 114.7    |
| C(18')-C(17')-H(17D) | 114.7    |
| O(4)-C(17')-H(17D)   | 114.7    |
| H(17C)-C(17')-H(17D) | 111.8    |
| C(9)-N(1)-C(10)      | 113.5(3) |
| C(9)-N(1)-H(1)       | 123.3    |
| C(10)-N(1)-H(1)      | 123.3    |
| C(9)-N(2)-C(13)      | 118.9(3) |
| C(9)-N(2)-C(12)      | 109.2(3) |
| C(13)-N(2)-C(12)     | 121.4(3) |
| C(20)-N(3)-C(21)     | 112.1(3) |
| C(20)-N(3)-H(3A)     | 123.9    |
| C(21)-N(3)-H(3A)     | 123.9    |
| C(13)-O(2)-H(2)      | 109.5    |
| C(16)-O(4)-C(17)     | 101.8(7) |
| C(16)-O(4)-C(17')    | 130.3(4) |
| C(17)-O(4)-C(17')    | 53.0(7)  |

Symmetry transformations used to generate equivalent atoms:

**Table S3.** Hydrogen bonds for 100903A [A and deg.].

| D-H...A             | d(D-H) | d(H...A) | d(D...A)  | <(DHA) |
|---------------------|--------|----------|-----------|--------|
| C(17)-H(17B)...O(3) | 0.97   | 1.98     | 2.387(12) | 102.7  |
| C(15)-H(15)...F(1)  | 0.98   | 2.51     | 2.872(4)  | 101.7  |
| O(2)-H(2)...O(5)    | 0.82   | 1.94     | 2.753(3)  | 169.6  |
| N(1)-H(1)...O(1)    | 0.86   | 2.04     | 2.607(4)  | 123.1  |

Symmetry transformations used to generate equivalent atoms:

### X-ray Structure and Data<sup>2</sup> of 5r'

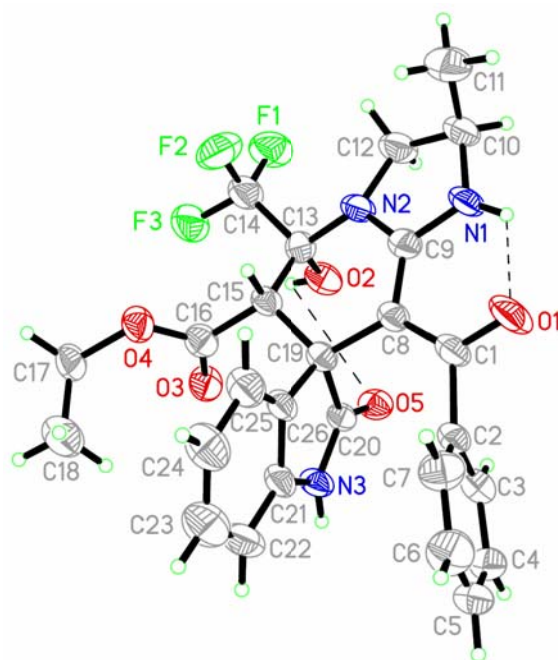

**Figure S2** X-Ray crystal structure of **5r'**

**Table S4** Crystal data and structure refinement for 100906A

|                                 |                                                                                              |                        |
|---------------------------------|----------------------------------------------------------------------------------------------|------------------------|
| Empirical formula               | C <sub>27</sub> H <sub>25</sub> Cl <sub>3</sub> F <sub>3</sub> N <sub>3</sub> O <sub>5</sub> |                        |
| Formula weight                  | 634.85                                                                                       |                        |
| Temperature                     | 293(2) K                                                                                     |                        |
| Wavelength                      | 0.71073 Å                                                                                    |                        |
| Crystal system, space group     | Triclinic, P-1                                                                               |                        |
| Unit cell dimensions            | a = 10.489(5) Å                                                                              | alpha = 73.462(5) deg. |
|                                 | b = 11.635(5) Å                                                                              | beta = 80.503(5) deg.  |
|                                 | c = 13.375(5) Å                                                                              | gamma = 72.854(5) deg. |
| Volume                          | 1489.3(11) Å <sup>3</sup>                                                                    |                        |
| Z, Calculated density           | 2, 1.416 Mg/m <sup>3</sup>                                                                   |                        |
| Absorption coefficient          | 0.367 mm <sup>-1</sup>                                                                       |                        |
| F(000)                          | 652                                                                                          |                        |
| Crystal size                    | 0.23x 0.19 x 0.14 mm                                                                         |                        |
| Theta range for data collection | 1.89 to 26.31 deg.                                                                           |                        |
| Limiting indices                | -12<=h<=13, -15<=k<=15, -17<=l<=17                                                           |                        |
| Reflection collected/unique     | 10468/6121[R(int) = 0.0656]                                                                  |                        |
| Completeness to theta = 28.2    | 96.6%                                                                                        |                        |
| Absorption correction           | Semi-empirical from equivalents                                                              |                        |
| Max. and min. transmission      | 0.9745 and 0.9532                                                                            |                        |
| Refinement method               | Full-matrix least-squares on F <sup>2</sup>                                                  |                        |
| Data/restraints/parameters      | 6121/ 0/ 374                                                                                 |                        |

|                                      |                                       |
|--------------------------------------|---------------------------------------|
| Goodness-of-fit on $F^2$             | 1.028                                 |
| Final R indices [ $I > 2\sigma(I)$ ] | $R1 = 0.1239$ , $wR2 = 0.3167$        |
| R indices (all data)                 | $R1 = 0.2712$ , $wR2 = 0.4173$        |
| Extinction coefficient               | 0.010(5)                              |
| Largest diff. peak and hole          | 0.689 and -0.735 e. $\text{\AA}^{-3}$ |

---

**Table S5** Bond lengths [ $\text{\AA}$ ] and angles [deg] for 100906A

---

|              |           |
|--------------|-----------|
| C(1)-O(1)    | 1.244(8)  |
| C(1)-C(8)    | 1.390(9)  |
| C(1)-C(2)    | 1.530(10) |
| C(2)-C(7)    | 1.371(10) |
| C(2)-C(3)    | 1.385(9)  |
| C(3)-C(4)    | 1.369(10) |
| C(3)-H(3)    | 0.9300    |
| C(4)-C(5)    | 1.352(11) |
| C(4)-H(4)    | 0.9300    |
| C(5)-C(6)    | 1.405(12) |
| C(5)-H(5)    | 0.9300    |
| C(6)-C(7)    | 1.355(12) |
| C(6)-H(6)    | 0.9300    |
| C(7)-H(7)    | 0.9300    |
| C(8)-C(9)    | 1.403(10) |
| C(8)-C(19)   | 1.523(8)  |
| C(9)-N(1)    | 1.320(8)  |
| C(9)-N(2)    | 1.359(8)  |
| C(10)-N(1)   | 1.464(9)  |
| C(10)-C(12)  | 1.486(10) |
| C(10)-C(11)  | 1.503(10) |
| C(10)-H(10)  | 0.9800    |
| C(11)-H(11A) | 0.9600    |
| C(11)-H(11B) | 0.9600    |
| C(11)-H(11C) | 0.9600    |
| C(12)-N(2)   | 1.483(9)  |
| C(12)-H(12A) | 0.9700    |
| C(12)-H(12B) | 0.9700    |
| C(13)-O(2)   | 1.396(7)  |
| C(13)-N(2)   | 1.444(8)  |
| C(13)-C(14)  | 1.533(10) |
| C(13)-C(15)  | 1.534(10) |

---

---

|                |           |
|----------------|-----------|
| C(14)-F(3)     | 1.317(8)  |
| C(14)-F(1)     | 1.328(10) |
| C(14)-F(2)     | 1.341(9)  |
| C(15)-C(16)    | 1.506(9)  |
| C(15)-C(19)    | 1.537(9)  |
| C(15)-H(15)    | 0.9800    |
| C(16)-O(3)     | 1.210(8)  |
| C(16)-O(4)     | 1.321(8)  |
| C(17)-C(18)    | 1.476(12) |
| C(17)-O(4)     | 1.477(8)  |
| C(17)-H(17A)   | 0.9700    |
| C(17)-H(17B)   | 0.9700    |
| C(18)-H(18A)   | 0.9600    |
| C(18)-H(18B)   | 0.9600    |
| C(18)-H(18C)   | 0.9600    |
| C(19)-C(26)    | 1.512(9)  |
| C(19)-C(20)    | 1.577(9)  |
| C(20)-O(5)     | 1.219(7)  |
| C(20)-N(3)     | 1.332(8)  |
| C(21)-C(22)    | 1.389(11) |
| C(21)-N(3)     | 1.399(8)  |
| C(21)-C(26)    | 1.410(9)  |
| C(22)-C(23)    | 1.385(12) |
| C(22)-H(22)    | 0.9300    |
| C(23)-C(24)    | 1.394(13) |
| C(23)-H(23)    | 0.9300    |
| C(24)-C(25)    | 1.403(11) |
| C(24)-H(24)    | 0.9300    |
| C(25)-C(26)    | 1.346(9)  |
| C(25)-H(25)    | 0.9300    |
| C(27)-Cl(3)    | 1.658(17) |
| C(27)-Cl(2)    | 1.72(2)   |
| C(27)-Cl(1)    | 1.85(2)   |
| C(27)-H(27)    | 0.9800    |
| N(1)-H(1)      | 0.8600    |
| N(3)-H(3A)     | 0.8600    |
| O(2)-H(2)      | 0.8200    |
| O(1)-C(1)-C(8) | 124.9(7)  |
| O(1)-C(1)-C(2) | 113.1(6)  |
| C(8)-C(1)-C(2) | 122.0(6)  |

---



---

|                     |          |
|---------------------|----------|
| C(7)-C(2)-C(3)      | 118.2(7) |
| C(7)-C(2)-C(1)      | 122.1(7) |
| C(3)-C(2)-C(1)      | 119.0(7) |
| C(4)-C(3)-C(2)      | 121.1(7) |
| C(4)-C(3)-H(3)      | 119.4    |
| C(2)-C(3)-H(3)      | 119.4    |
| C(5)-C(4)-C(3)      | 119.2(8) |
| C(5)-C(4)-H(4)      | 120.4    |
| C(3)-C(4)-H(4)      | 120.4    |
| C(4)-C(5)-C(6)      | 121.3(8) |
| C(4)-C(5)-H(5)      | 119.3    |
| C(6)-C(5)-H(5)      | 119.3    |
| C(7)-C(6)-C(5)      | 117.8(8) |
| C(7)-C(6)-H(6)      | 121.1    |
| C(5)-C(6)-H(6)      | 121.1    |
| C(6)-C(7)-C(2)      | 122.3(8) |
| C(6)-C(7)-H(7)      | 118.9    |
| C(2)-C(7)-H(7)      | 118.9    |
| C(1)-C(8)-C(9)      | 118.1(6) |
| C(1)-C(8)-C(19)     | 124.3(6) |
| C(9)-C(8)-C(19)     | 117.4(6) |
| N(1)-C(9)-N(2)      | 108.5(6) |
| N(1)-C(9)-C(8)      | 126.0(7) |
| N(2)-C(9)-C(8)      | 125.4(6) |
| N(1)-C(10)-C(12)    | 101.0(6) |
| N(1)-C(10)-C(11)    | 110.1(7) |
| C(12)-C(10)-C(11)   | 113.7(7) |
| N(1)-C(10)-H(10)    | 110.6    |
| C(12)-C(10)-H(10)   | 110.6    |
| C(11)-C(10)-H(10)   | 110.6    |
| C(10)-C(11)-H(11A)  | 109.5    |
| C(10)-C(11)-H(11B)  | 109.5    |
| H(11A)-C(11)-H(11B) | 109.5    |
| C(10)-C(11)-H(11C)  | 109.5    |
| H(11A)-C(11)-H(11C) | 109.5    |
| H(11B)-C(11)-H(11C) | 109.5    |
| N(2)-C(12)-C(10)    | 103.4(6) |
| N(2)-C(12)-H(12A)   | 111.1    |
| C(10)-C(12)-H(12A)  | 111.1    |
| N(2)-C(12)-H(12B)   | 111.1    |

---

---

|                     |          |
|---------------------|----------|
| C(10)-C(12)-H(12B)  | 111.1    |
| H(12A)-C(12)-H(12B) | 109.0    |
| O(2)-C(13)-N(2)     | 112.1(6) |
| O(2)-C(13)-C(14)    | 104.2(6) |
| N(2)-C(13)-C(14)    | 108.2(6) |
| O(2)-C(13)-C(15)    | 114.5(6) |
| N(2)-C(13)-C(15)    | 107.3(5) |
| C(14)-C(13)-C(15)   | 110.5(6) |
| F(3)-C(14)-F(1)     | 106.6(7) |
| F(3)-C(14)-F(2)     | 105.4(7) |
| F(1)-C(14)-F(2)     | 107.1(7) |
| F(3)-C(14)-C(13)    | 112.5(7) |
| F(1)-C(14)-C(13)    | 113.5(7) |
| F(2)-C(14)-C(13)    | 111.2(7) |
| C(16)-C(15)-C(13)   | 114.4(5) |
| C(16)-C(15)-C(19)   | 110.4(5) |
| C(13)-C(15)-C(19)   | 113.7(5) |
| C(16)-C(15)-H(15)   | 105.9    |
| C(13)-C(15)-H(15)   | 105.9    |
| C(19)-C(15)-H(15)   | 105.9    |
| O(3)-C(16)-O(4)     | 123.3(7) |
| O(3)-C(16)-C(15)    | 124.1(7) |
| O(4)-C(16)-C(15)    | 112.5(6) |
| C(18)-C(17)-O(4)    | 110.1(7) |
| C(18)-C(17)-H(17A)  | 109.6    |
| O(4)-C(17)-H(17A)   | 109.6    |
| C(18)-C(17)-H(17B)  | 109.6    |
| O(4)-C(17)-H(17B)   | 109.6    |
| H(17A)-C(17)-H(17B) | 108.2    |
| C(17)-C(18)-H(18A)  | 109.5    |
| C(17)-C(18)-H(18B)  | 109.5    |
| H(18A)-C(18)-H(18B) | 109.5    |
| C(17)-C(18)-H(18C)  | 109.5    |
| H(18A)-C(18)-H(18C) | 109.5    |
| H(18B)-C(18)-H(18C) | 109.5    |
| C(26)-C(19)-C(8)    | 115.2(5) |
| C(26)-C(19)-C(15)   | 108.1(5) |
| C(8)-C(19)-C(15)    | 110.8(5) |
| C(26)-C(19)-C(20)   | 100.7(6) |
| C(8)-C(19)-C(20)    | 110.2(5) |

---

---

|                   |           |
|-------------------|-----------|
| C(15)-C(19)-C(20) | 111.4(5)  |
| O(5)-C(20)-N(3)   | 126.2(6)  |
| O(5)-C(20)-C(19)  | 124.6(6)  |
| N(3)-C(20)-C(19)  | 109.1(6)  |
| C(22)-C(21)-N(3)  | 129.5(7)  |
| C(22)-C(21)-C(26) | 120.2(8)  |
| N(3)-C(21)-C(26)  | 110.3(6)  |
| C(23)-C(22)-C(21) | 118.4(8)  |
| C(23)-C(22)-H(22) | 120.8     |
| C(21)-C(22)-H(22) | 120.8     |
| C(22)-C(23)-C(24) | 121.9(9)  |
| C(22)-C(23)-H(23) | 119.0     |
| C(24)-C(23)-H(23) | 119.0     |
| C(23)-C(24)-C(25) | 117.9(8)  |
| C(23)-C(24)-H(24) | 121.0     |
| C(25)-C(24)-H(24) | 121.0     |
| C(26)-C(25)-C(24) | 121.3(8)  |
| C(26)-C(25)-H(25) | 119.3     |
| C(24)-C(25)-H(25) | 119.3     |
| C(25)-C(26)-C(21) | 120.1(7)  |
| C(25)-C(26)-C(19) | 131.5(7)  |
| C(21)-C(26)-C(19) | 108.3(6)  |
| Cl(3)-C(27)-Cl(2) | 110.5(16) |
| Cl(3)-C(27)-Cl(1) | 111.3(10) |
| Cl(2)-C(27)-Cl(1) | 103.2(7)  |
| Cl(3)-C(27)-H(27) | 110.6     |
| Cl(2)-C(27)-H(27) | 110.6     |
| Cl(1)-C(27)-H(27) | 110.6     |
| C(9)-N(1)-C(10)   | 113.3(6)  |
| C(9)-N(1)-H(1)    | 123.4     |
| C(10)-N(1)-H(1)   | 123.4     |
| C(9)-N(2)-C(13)   | 120.5(6)  |
| C(9)-N(2)-C(12)   | 108.7(6)  |
| C(13)-N(2)-C(12)  | 123.5(6)  |
| C(20)-N(3)-C(21)  | 111.5(6)  |
| C(20)-N(3)-H(3A)  | 124.2     |
| C(21)-N(3)-H(3A)  | 124.2     |
| C(13)-O(2)-H(2)   | 109.5     |
| C(16)-O(4)-C(17)  | 117.8(5)  |

---

Symmetry transformations used to generate equivalent atoms:

**Table S6.** Hydrogen bonds for 100903A [A and deg.].

| D-H...A             | d(D-H) | d(H...A) | d(D...A)  | <(DHA) |
|---------------------|--------|----------|-----------|--------|
| C(15)-H(15)...F(2)  | 0.98   | 2.54     | 2.902(8)  | 101.6  |
| C(12)-H(12A)...F(1) | 0.97   | 2.39     | 2.795(9)  | 104.8  |
| C(6)-H(6)...O(2)#1  | 0.93   | 2.49     | 3.400(10) | 165.4  |
| N(3)-H(3A)...O(5)#2 | 0.86   | 2.05     | 2.853(7)  | 155.4  |
| O(2)-H(2)...F(3)    | 0.82   | 2.35     | 2.767(7)  | 112.6  |
| N(1)-H(1)...O(1)#3  | 0.86   | 2.10     | 2.867(8)  | 148.4  |
| N(1)-H(1)...O(1)    | 0.86   | 2.05     | 2.623(8)  | 123.2  |

Symmetry transformations used to generate equivalent atoms:

#1  $x+1, y, z$     #2  $-x, -y+1, -z$     #3  $-x, -y+1, -z+1$

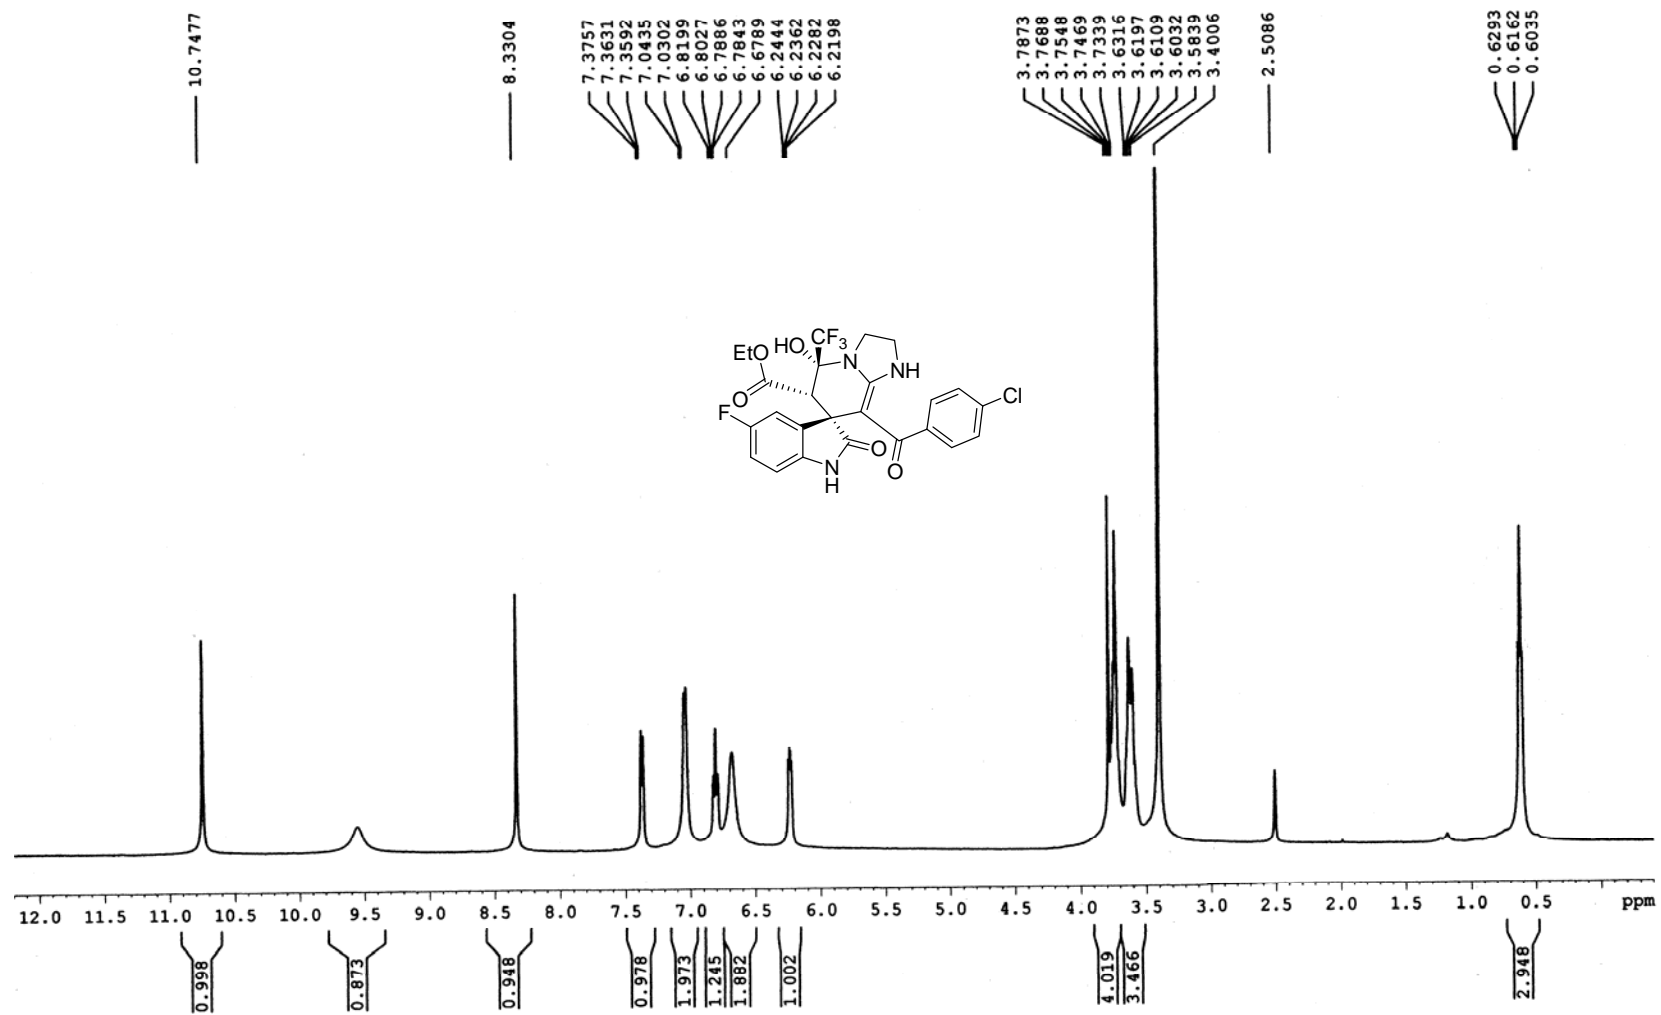

Figure 1.  $^1\text{H}$  NMR (500 MHz,  $\text{DMSO-}d_6$ ) spectra of compound 5a

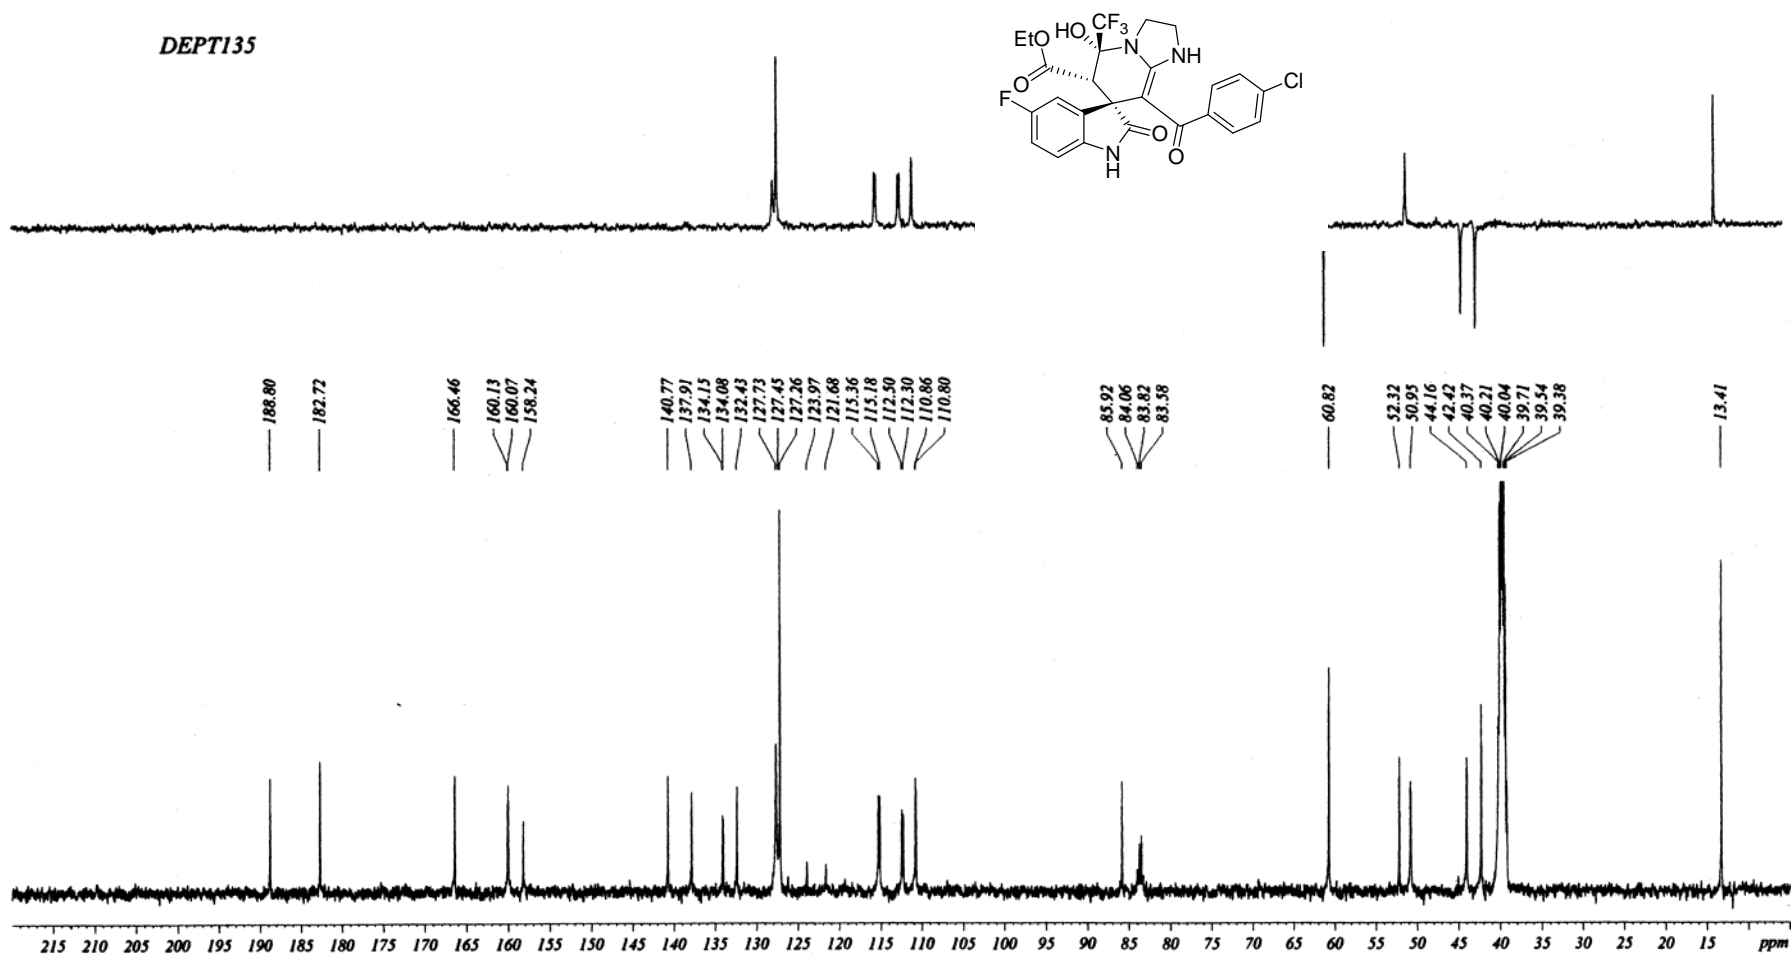

**Figure 2.** <sup>13</sup>C NMR (125 MHz, DMSO-*d*<sub>6</sub>) spectra of compound **5a**

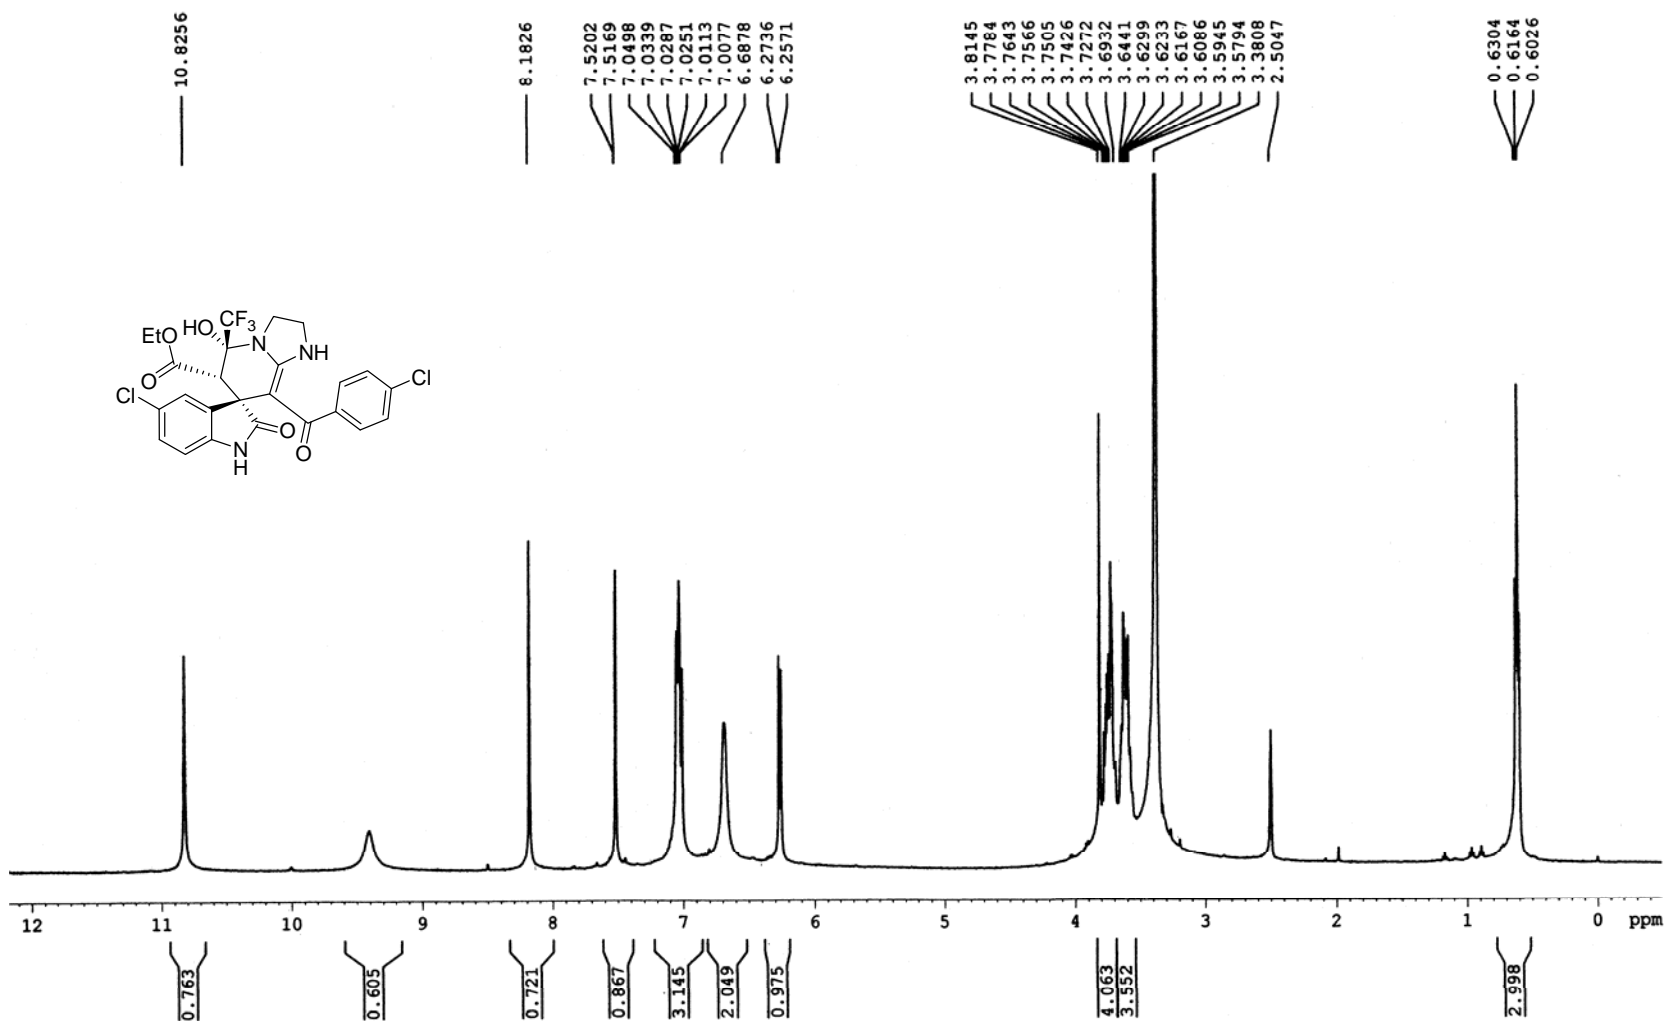

Figure 3. <sup>1</sup>H NMR (500 MHz, DMSO-*d*<sub>6</sub>) spectra of compound **5b**

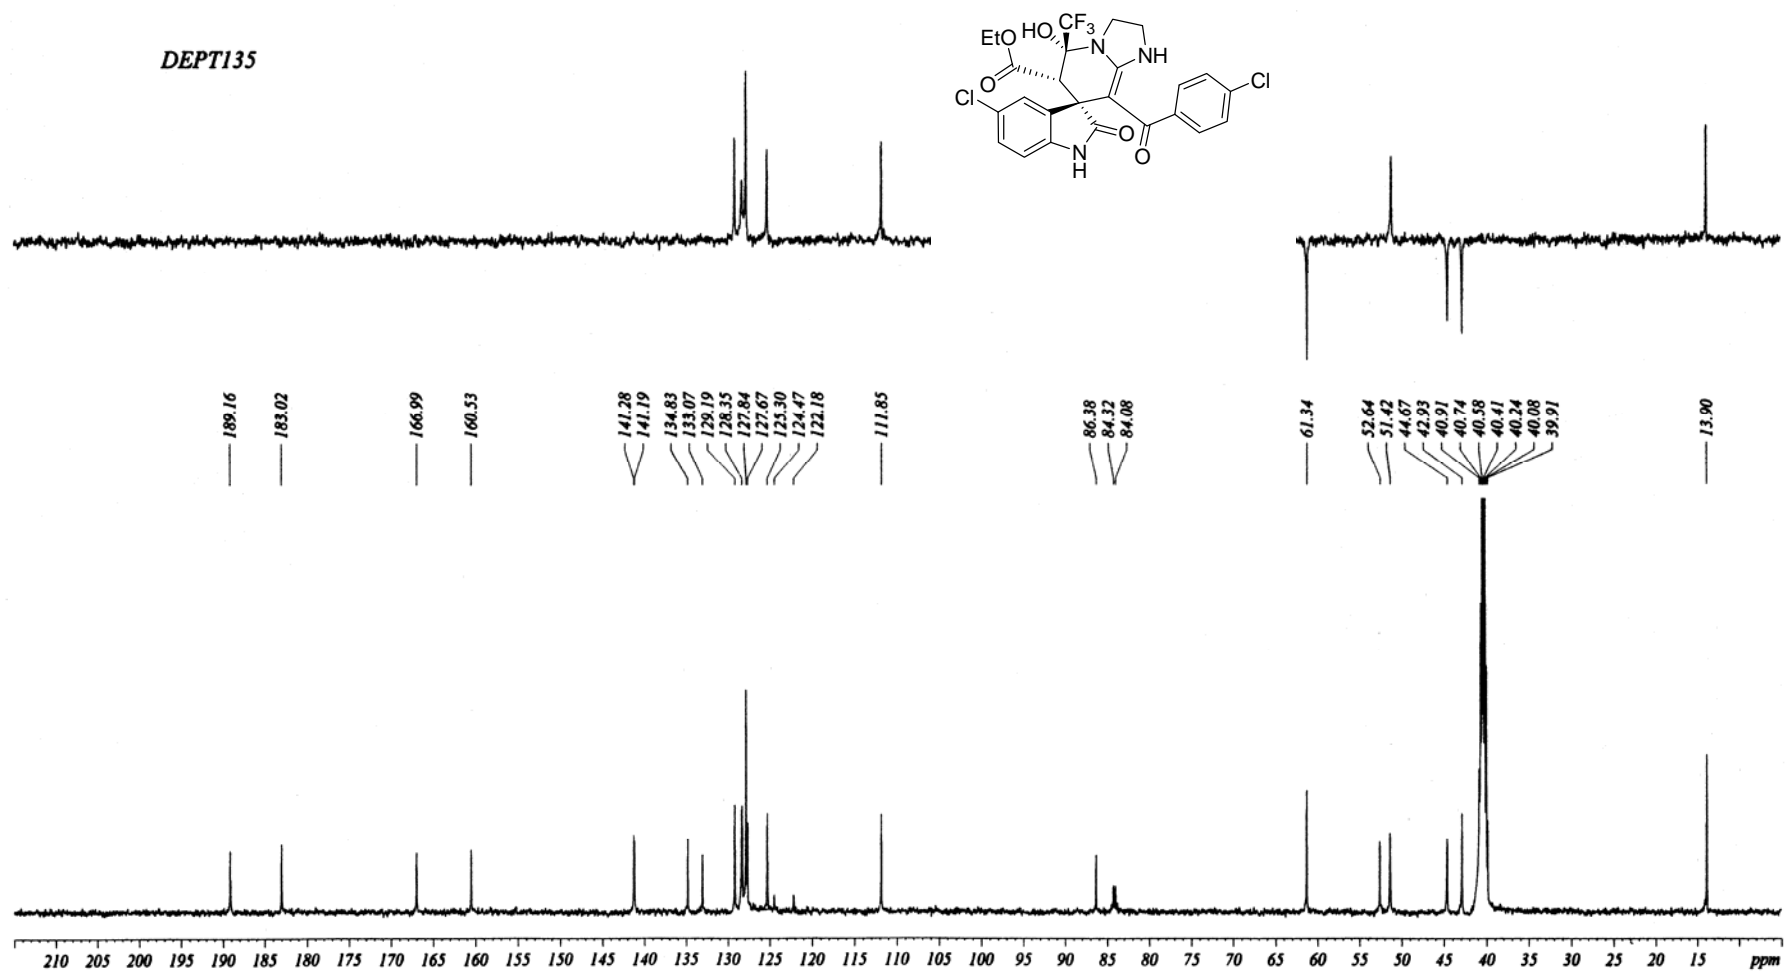

Figure 4. <sup>13</sup>C NMR (125 MHz, DMSO-*d*<sub>6</sub>) spectra of compound **5b**



YUNNAN UNIVER. AV. DRX 500  
yufuchao YFC-65 in DMSO  
12072002

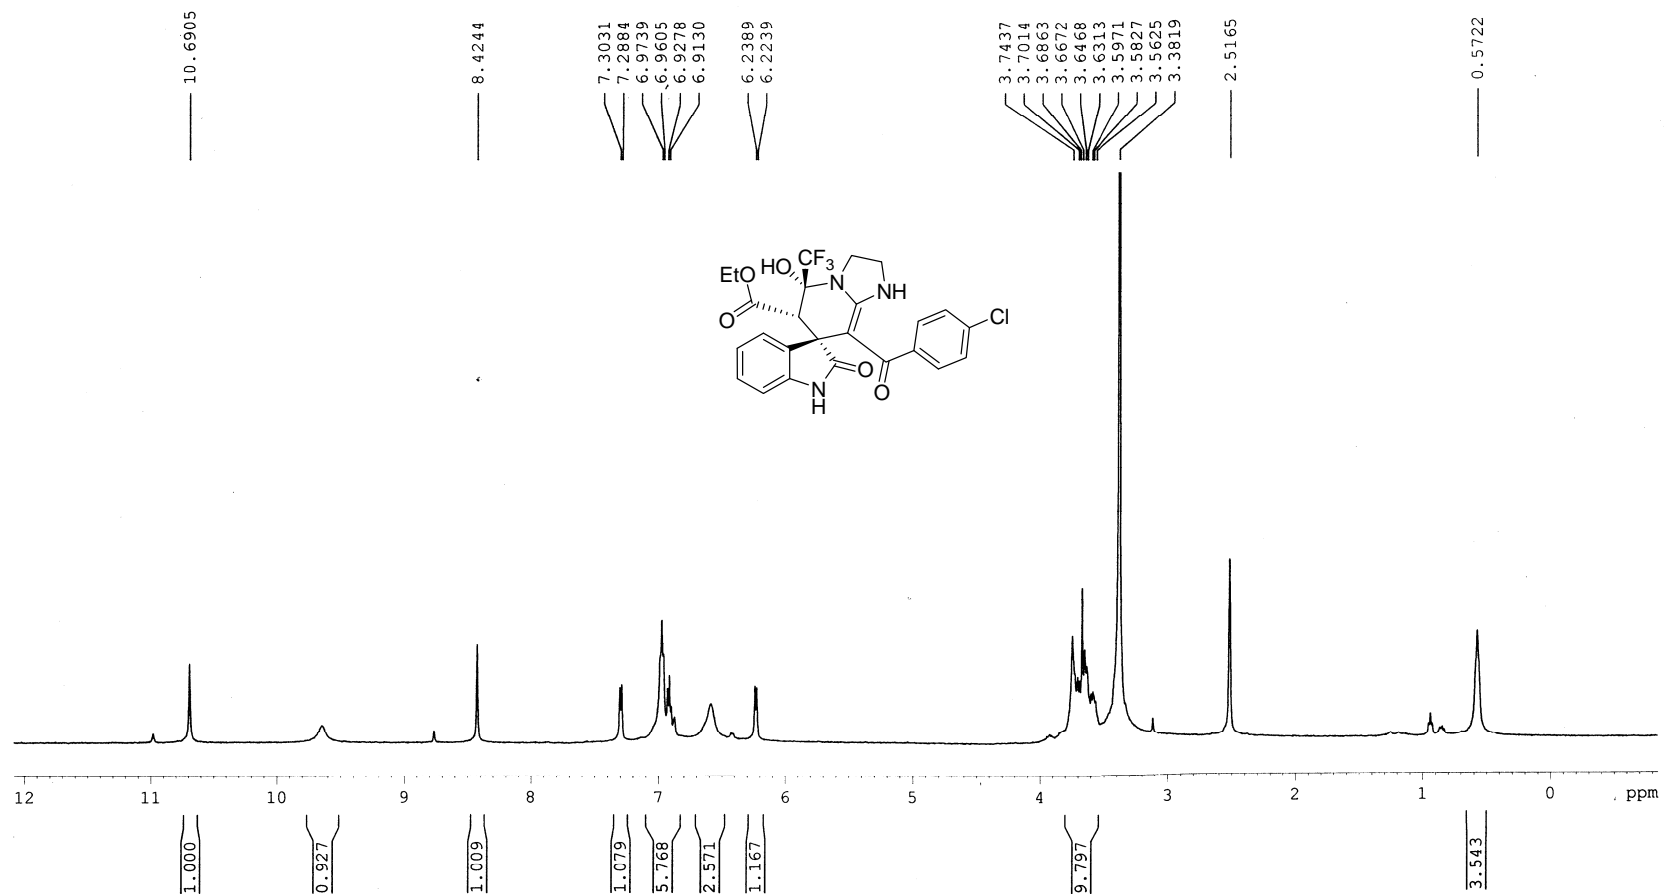

Figure 5. <sup>1</sup>H NMR (500 MHz, DMSO-*d*<sub>6</sub>) spectra of compound 5c

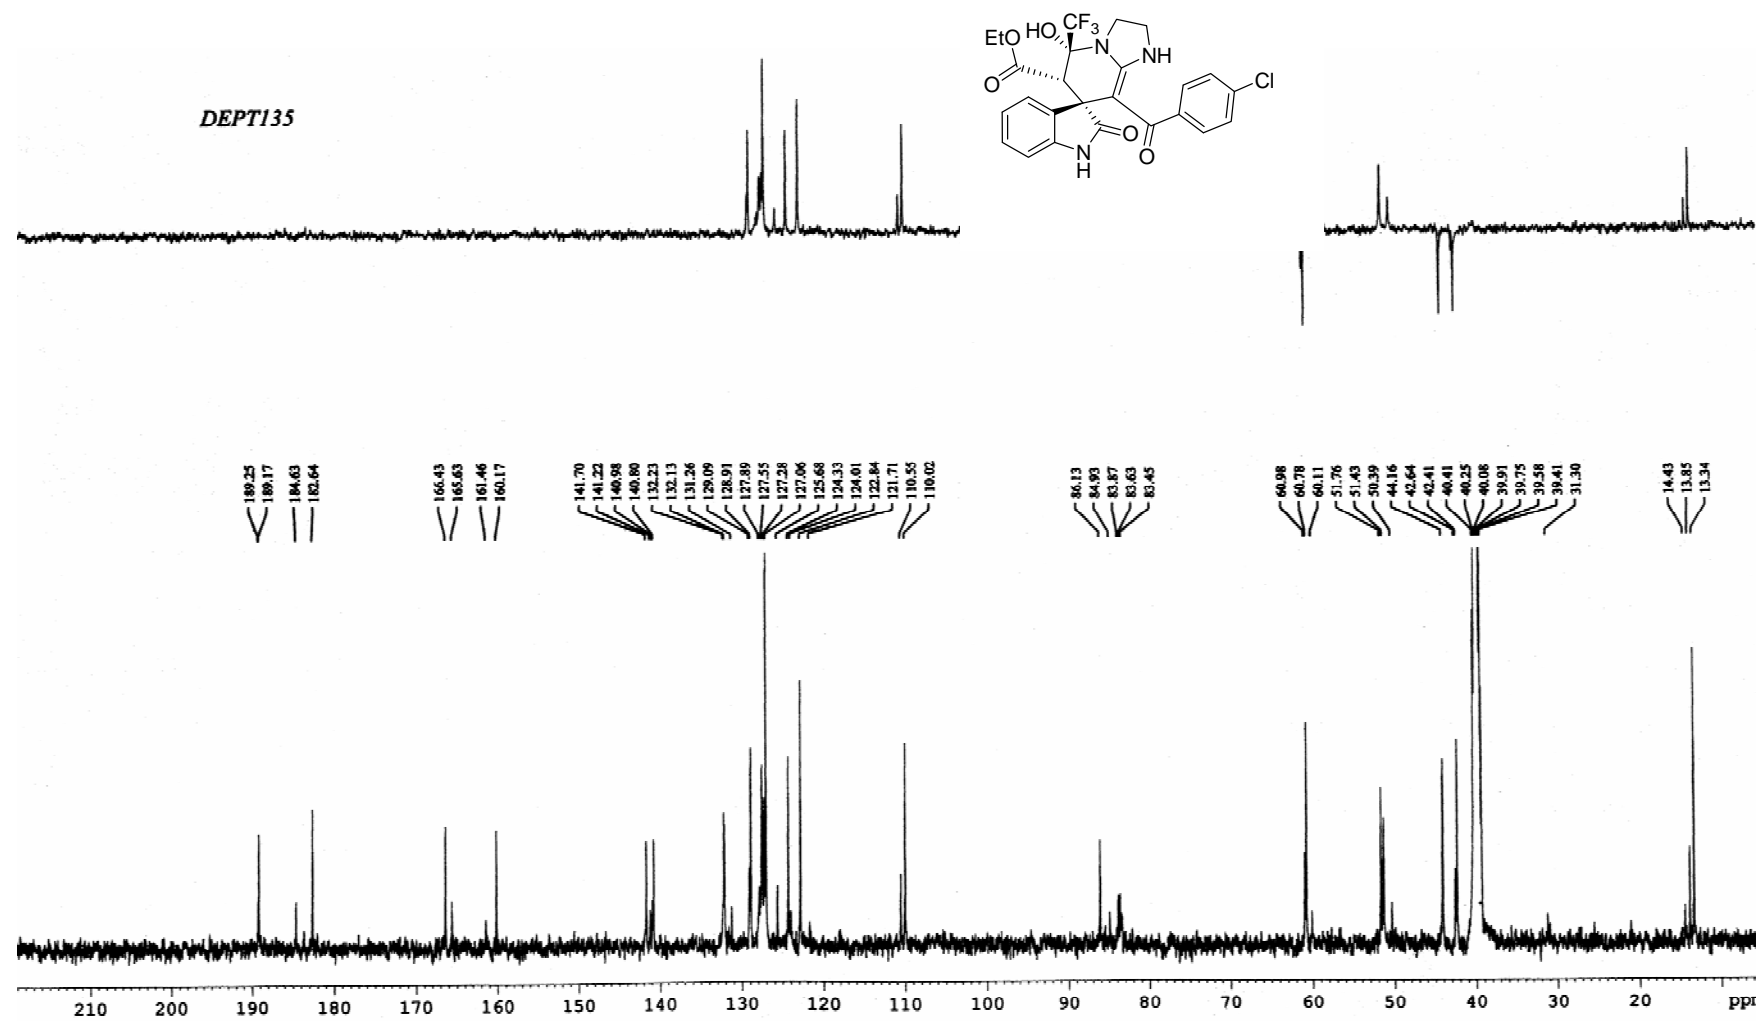

Figure 6.  $^{13}\text{C}$  NMR (125 MHz,  $\text{DMSO}-d_6$ ) spectra of compound 5c

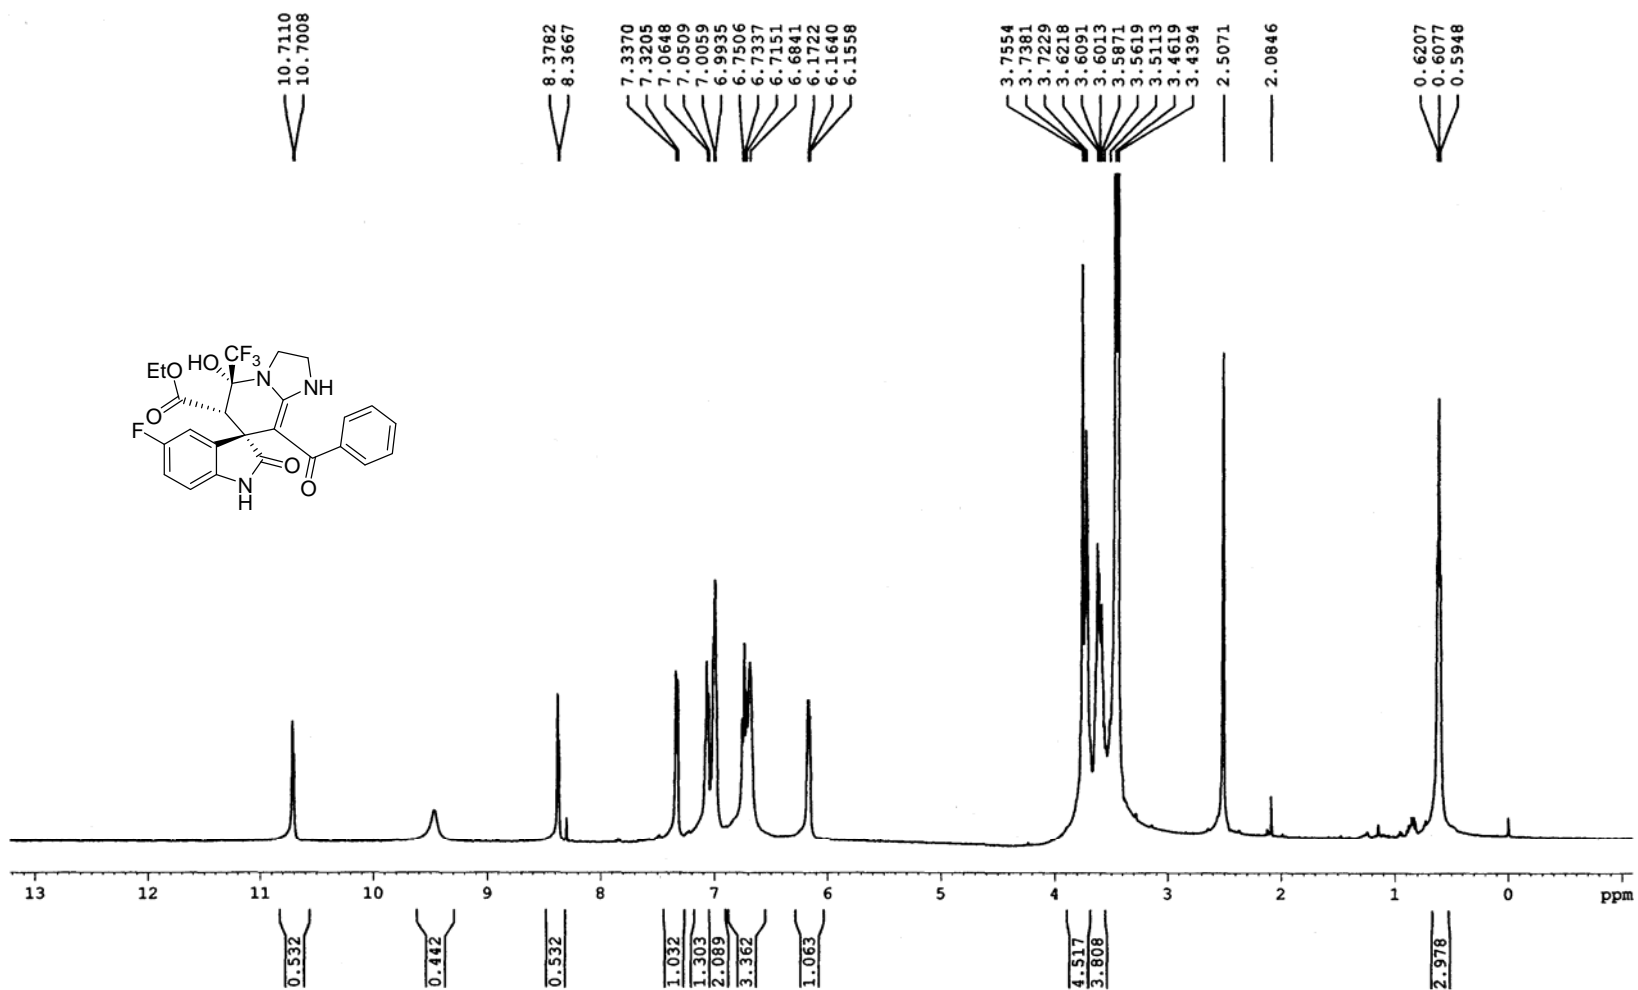

Figure 7. <sup>1</sup>H NMR (500 MHz, DMSO-*d*<sub>6</sub>) spectra of compound 5d

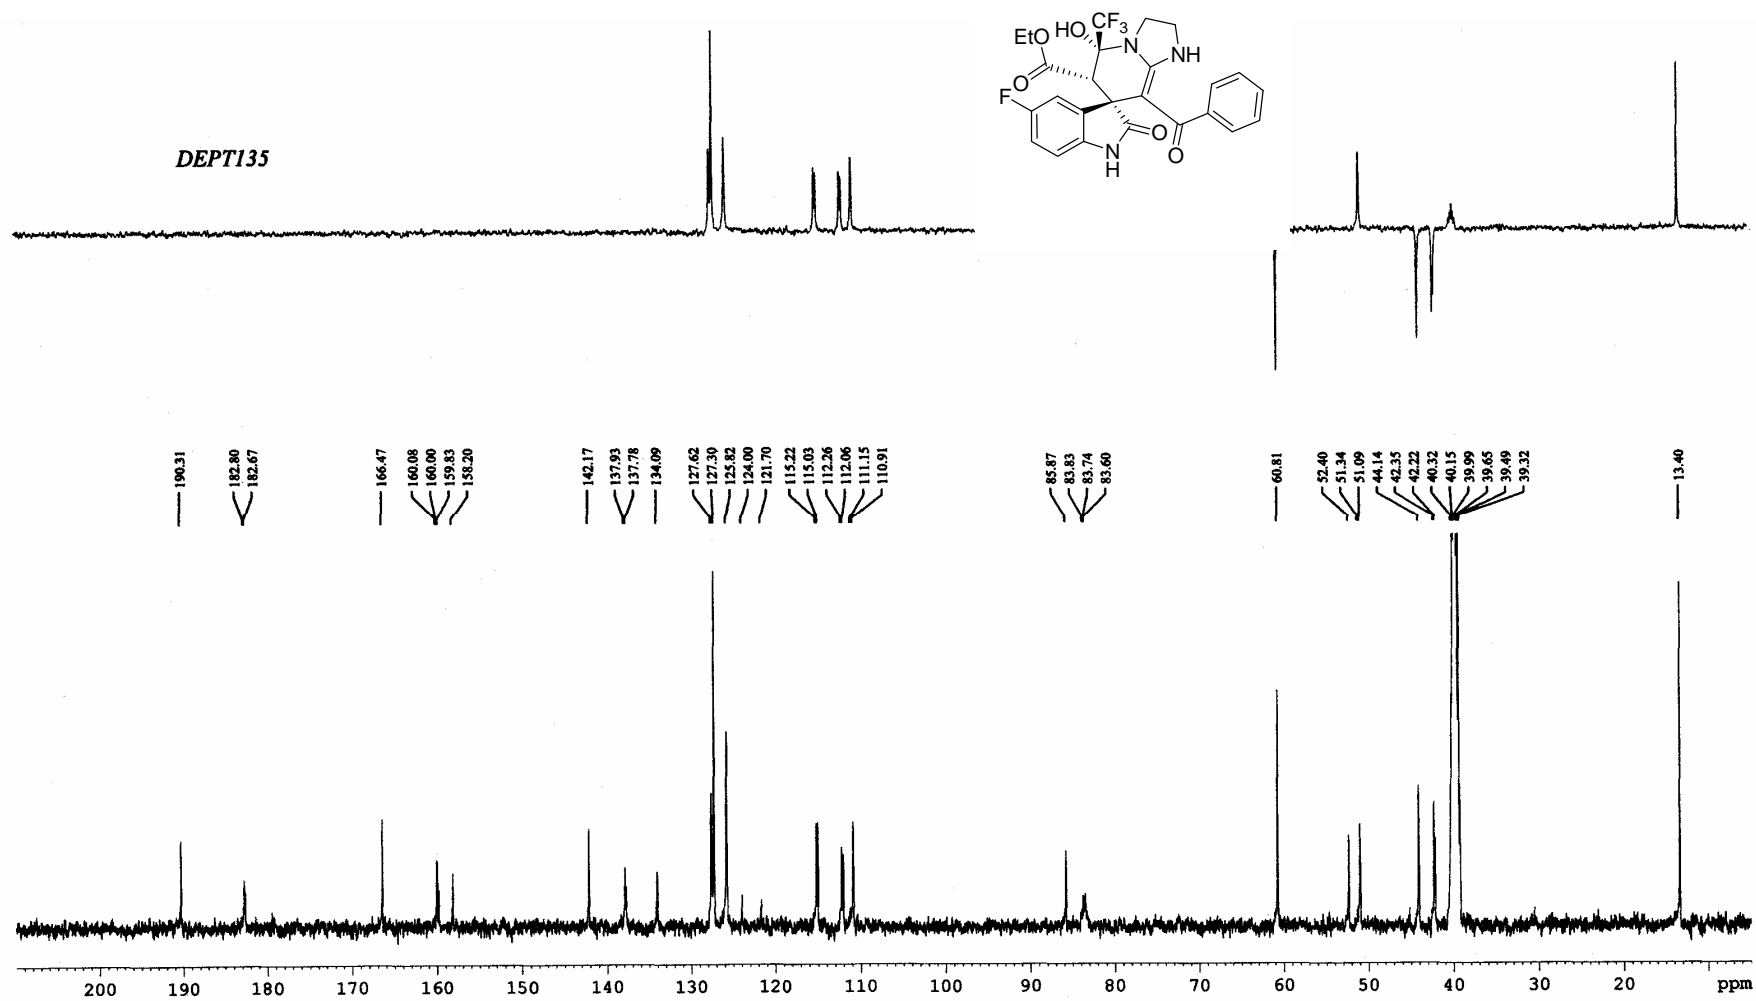

**Figure 8.**  $^{13}\text{C}$  NMR (125 MHz,  $\text{DMSO-}d_6$ ) spectra of compound **5d**

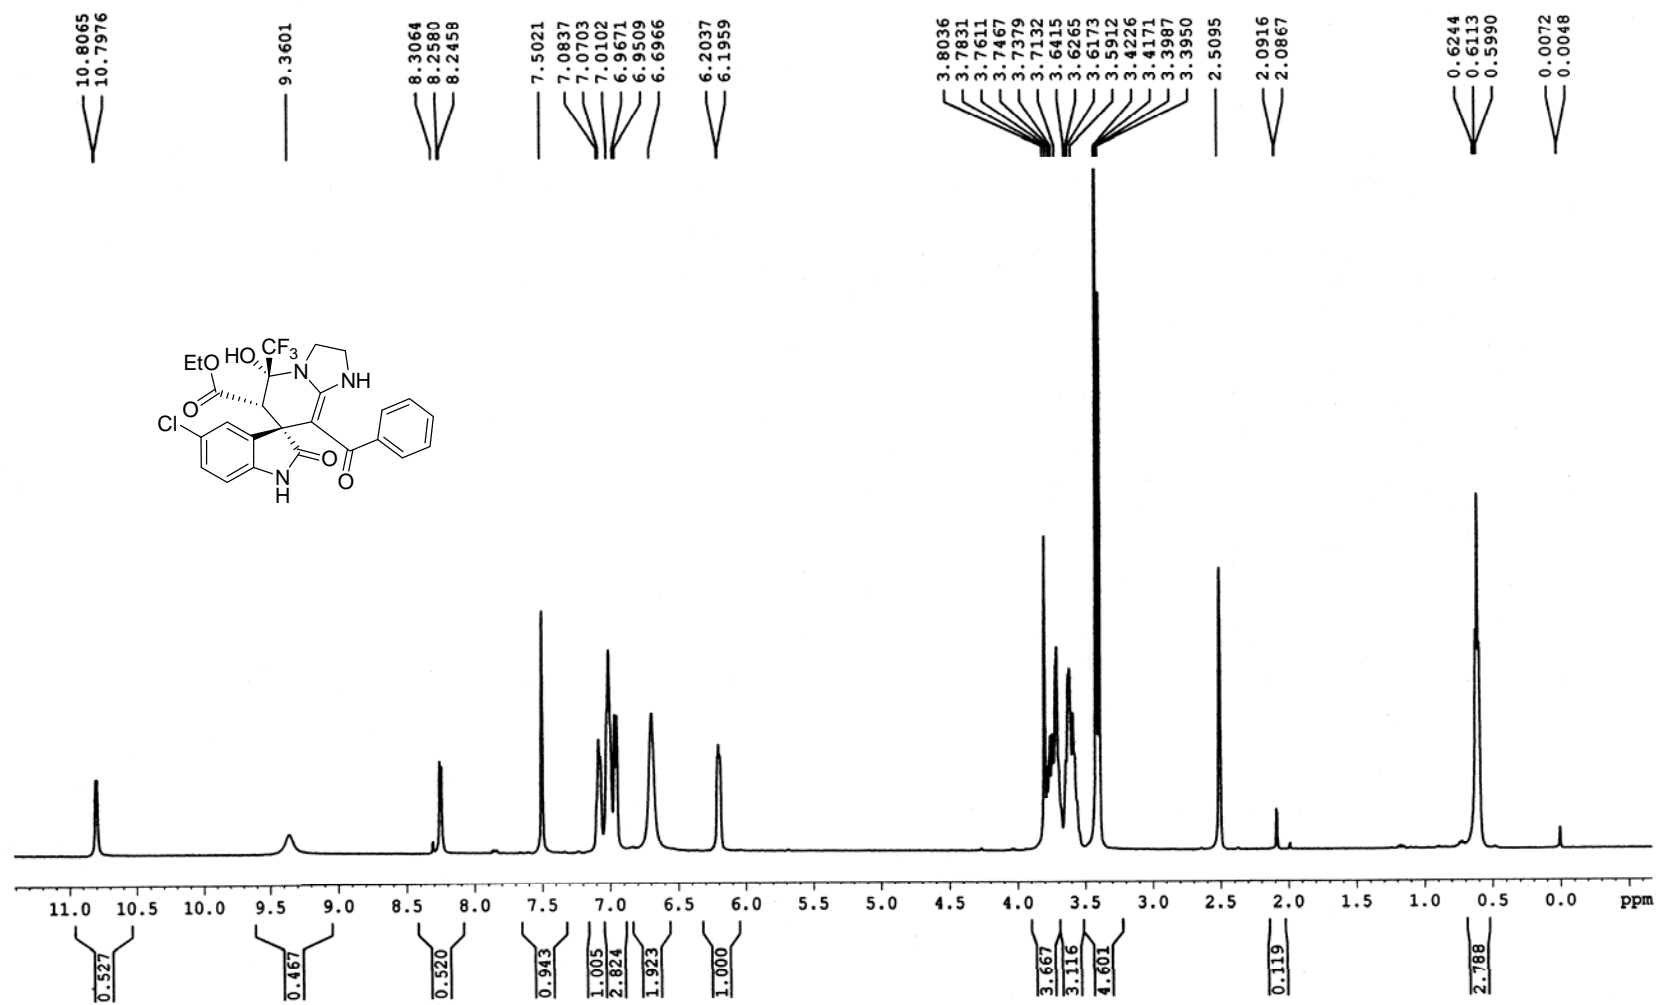

Figure 9. <sup>1</sup>H NMR (500 MHz, DMSO-*d*<sub>6</sub> + HClO<sub>4</sub>) spectra of compound 5e

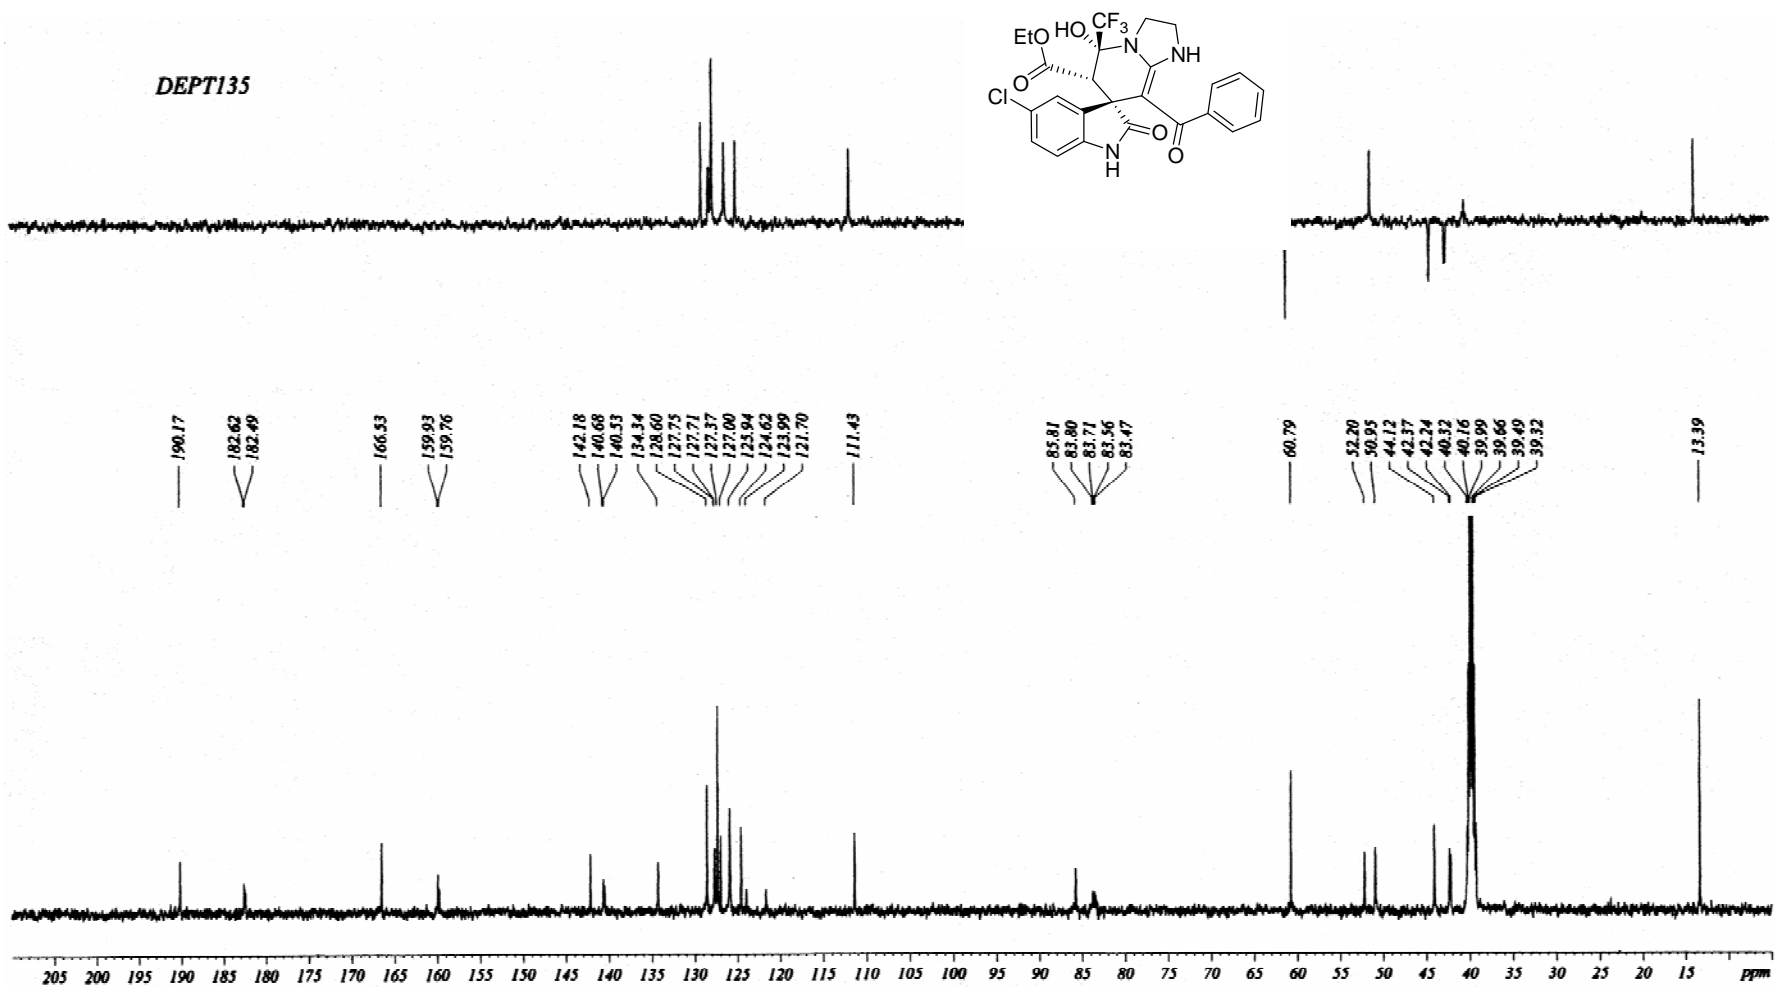

Figure 10.  $^{13}\text{C}$  NMR (125 MHz, DMSO- $d_6$  + HClO $_4$ ) spectra of compound 5e

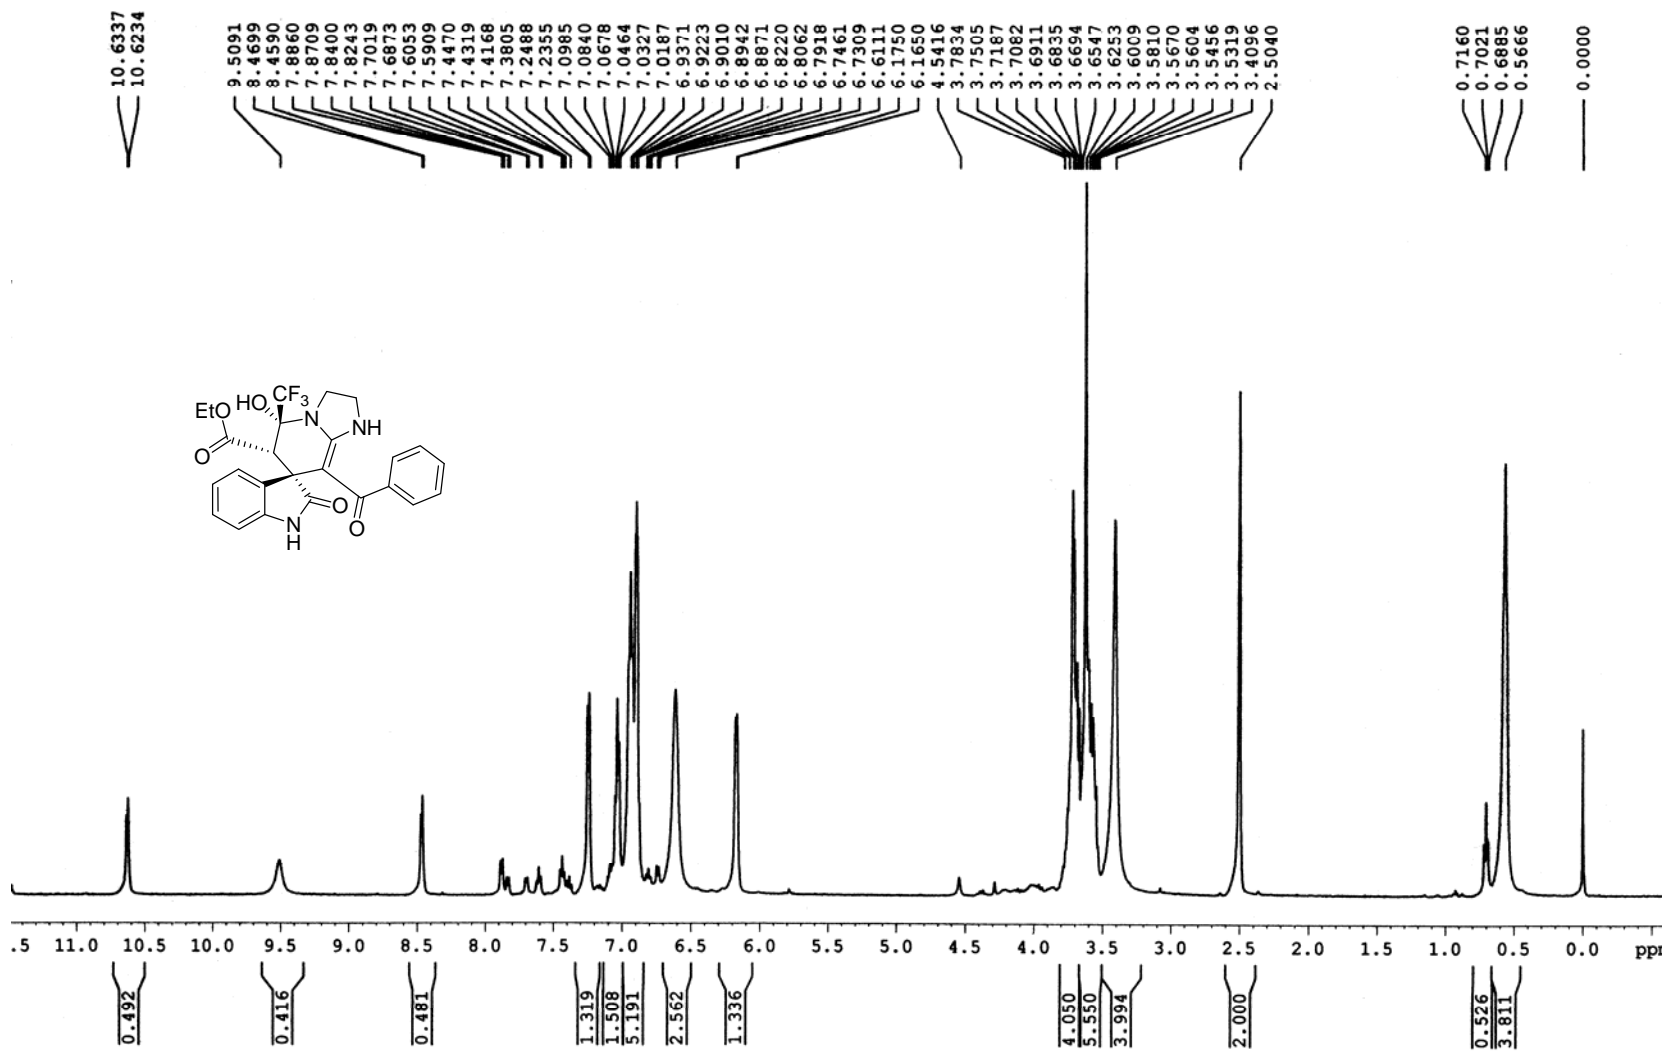

Figure 11.  $^1\text{H NMR}$  (500 MHz,  $\text{DMSO-}d_6$ ) spectra of compound **5f**

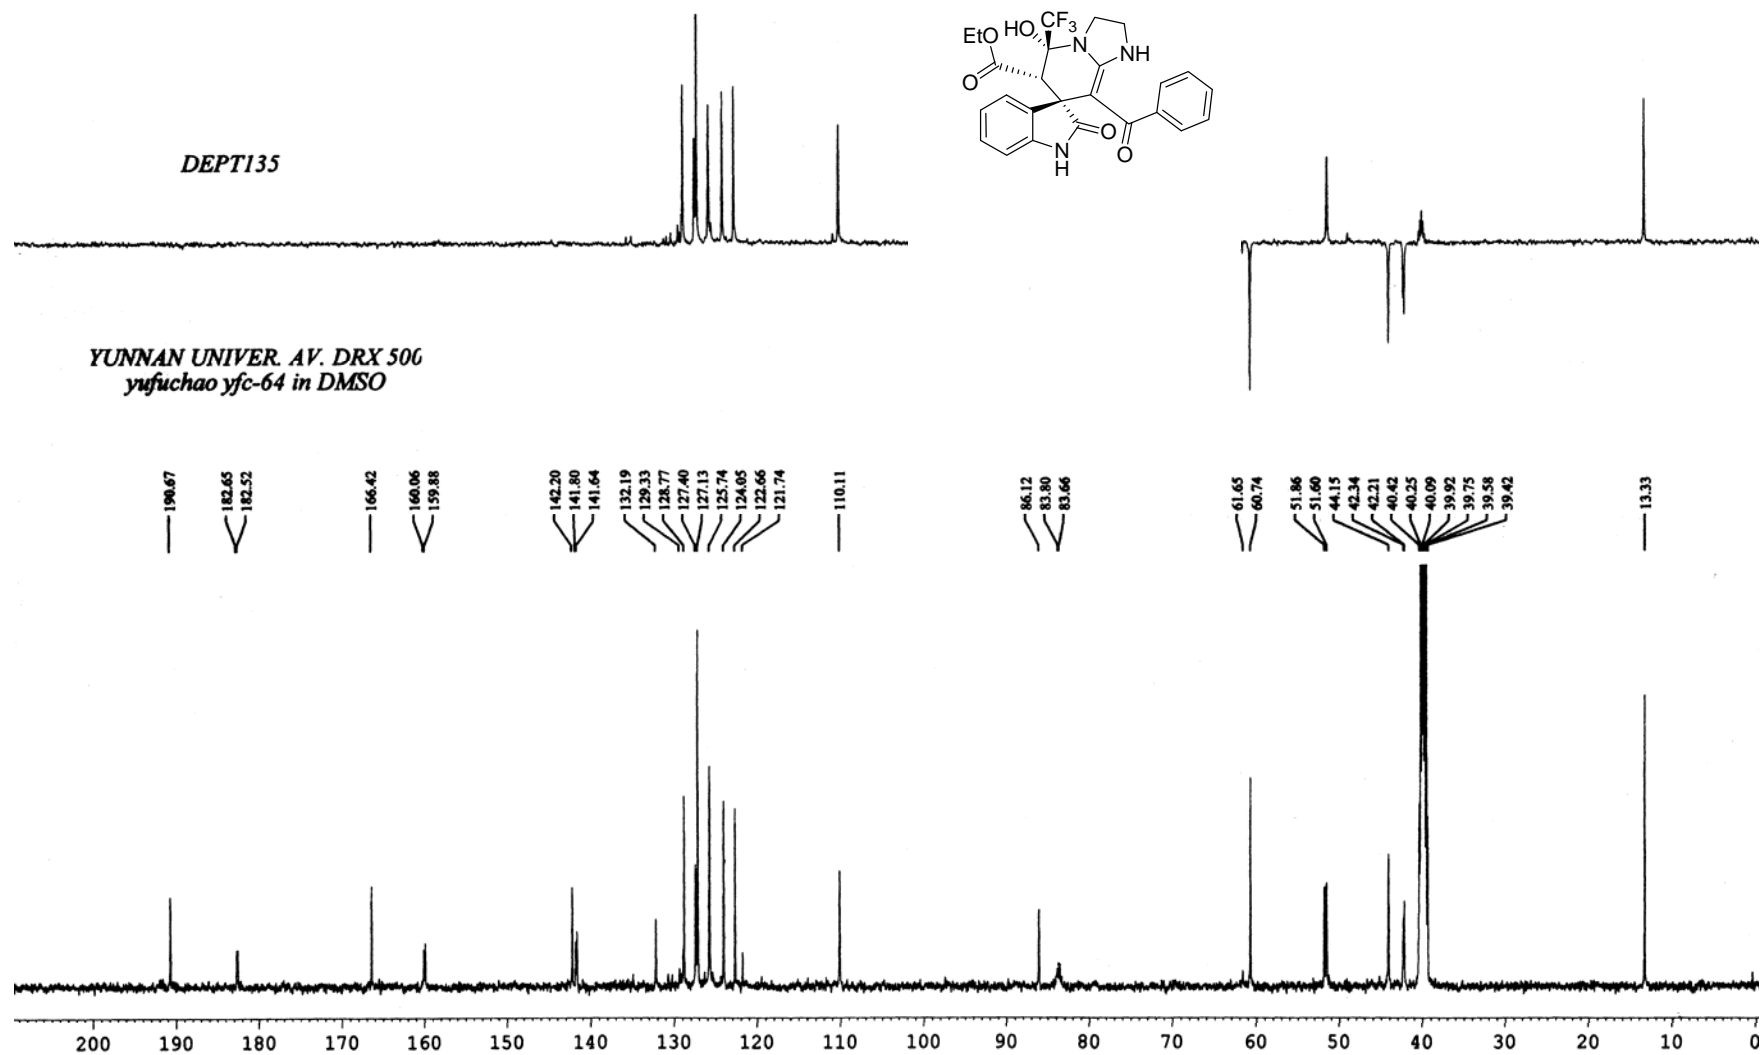

Figure 12.  $^{13}\text{C}$  NMR (125 MHz,  $\text{DMSO-}d_6$ ) spectra of compound 5f



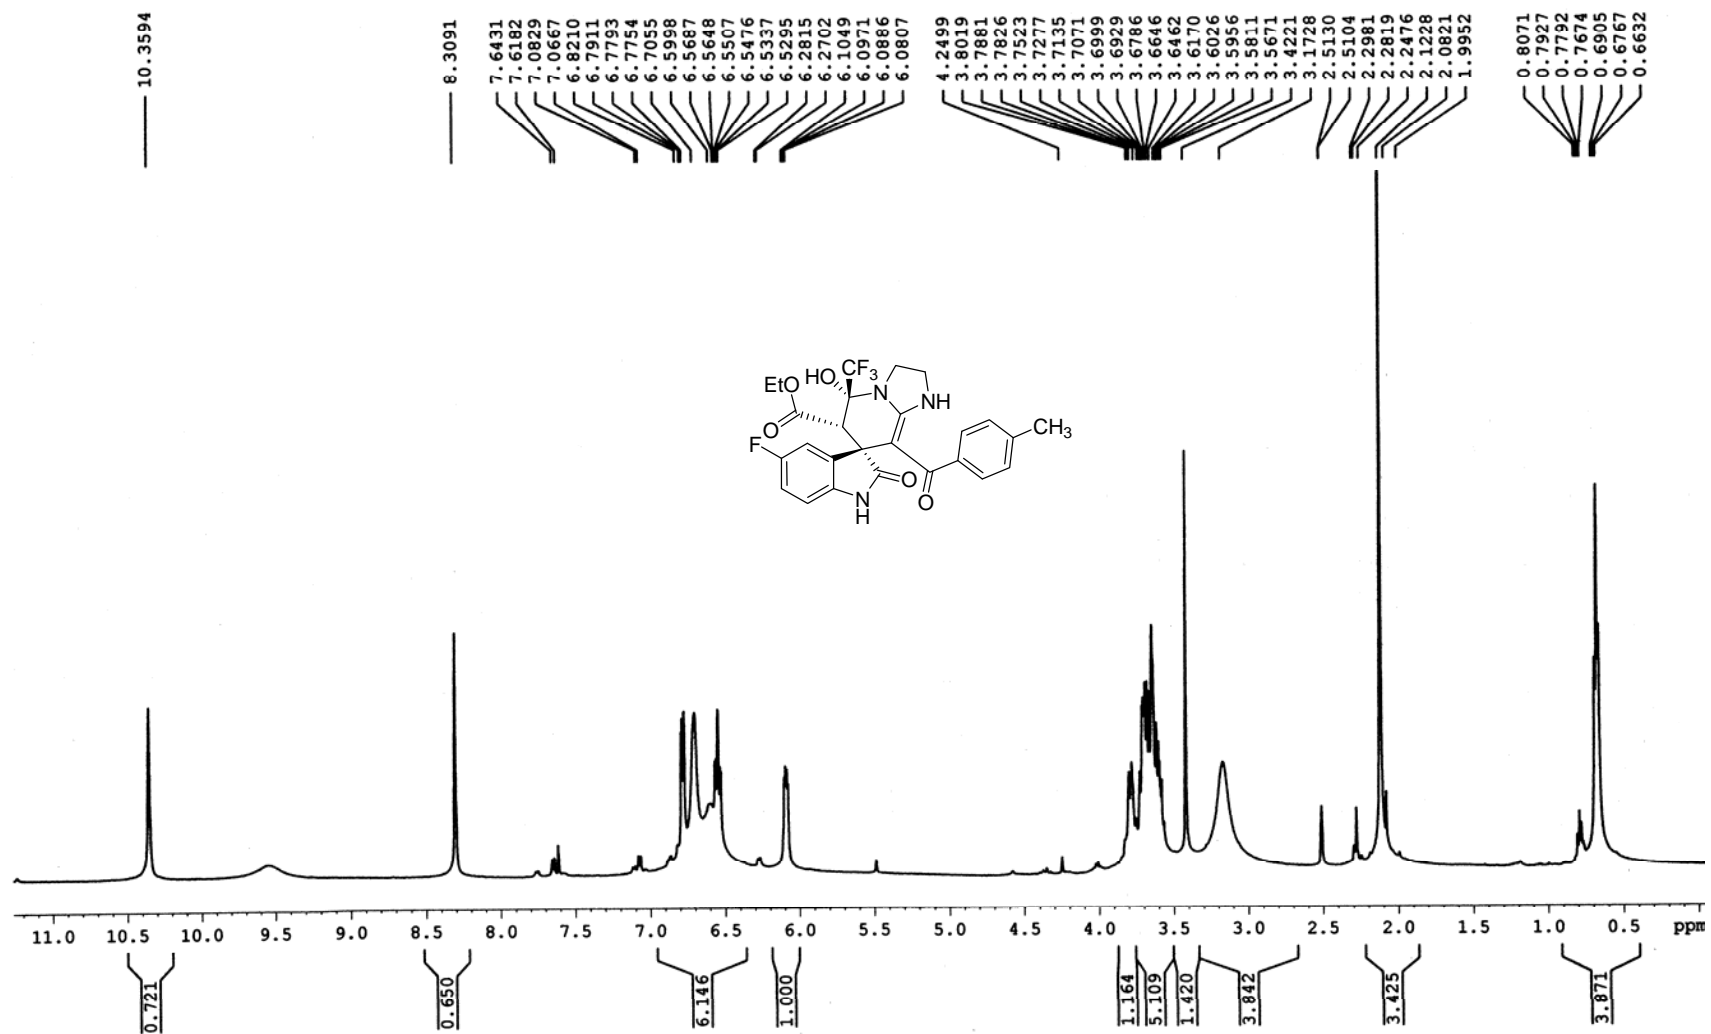

**Figure 13.**  $^1\text{H}$  NMR (500 MHz,  $\text{CDCl}_3 + \text{DMSO-}d_6$ ) spectra of compound **5g**

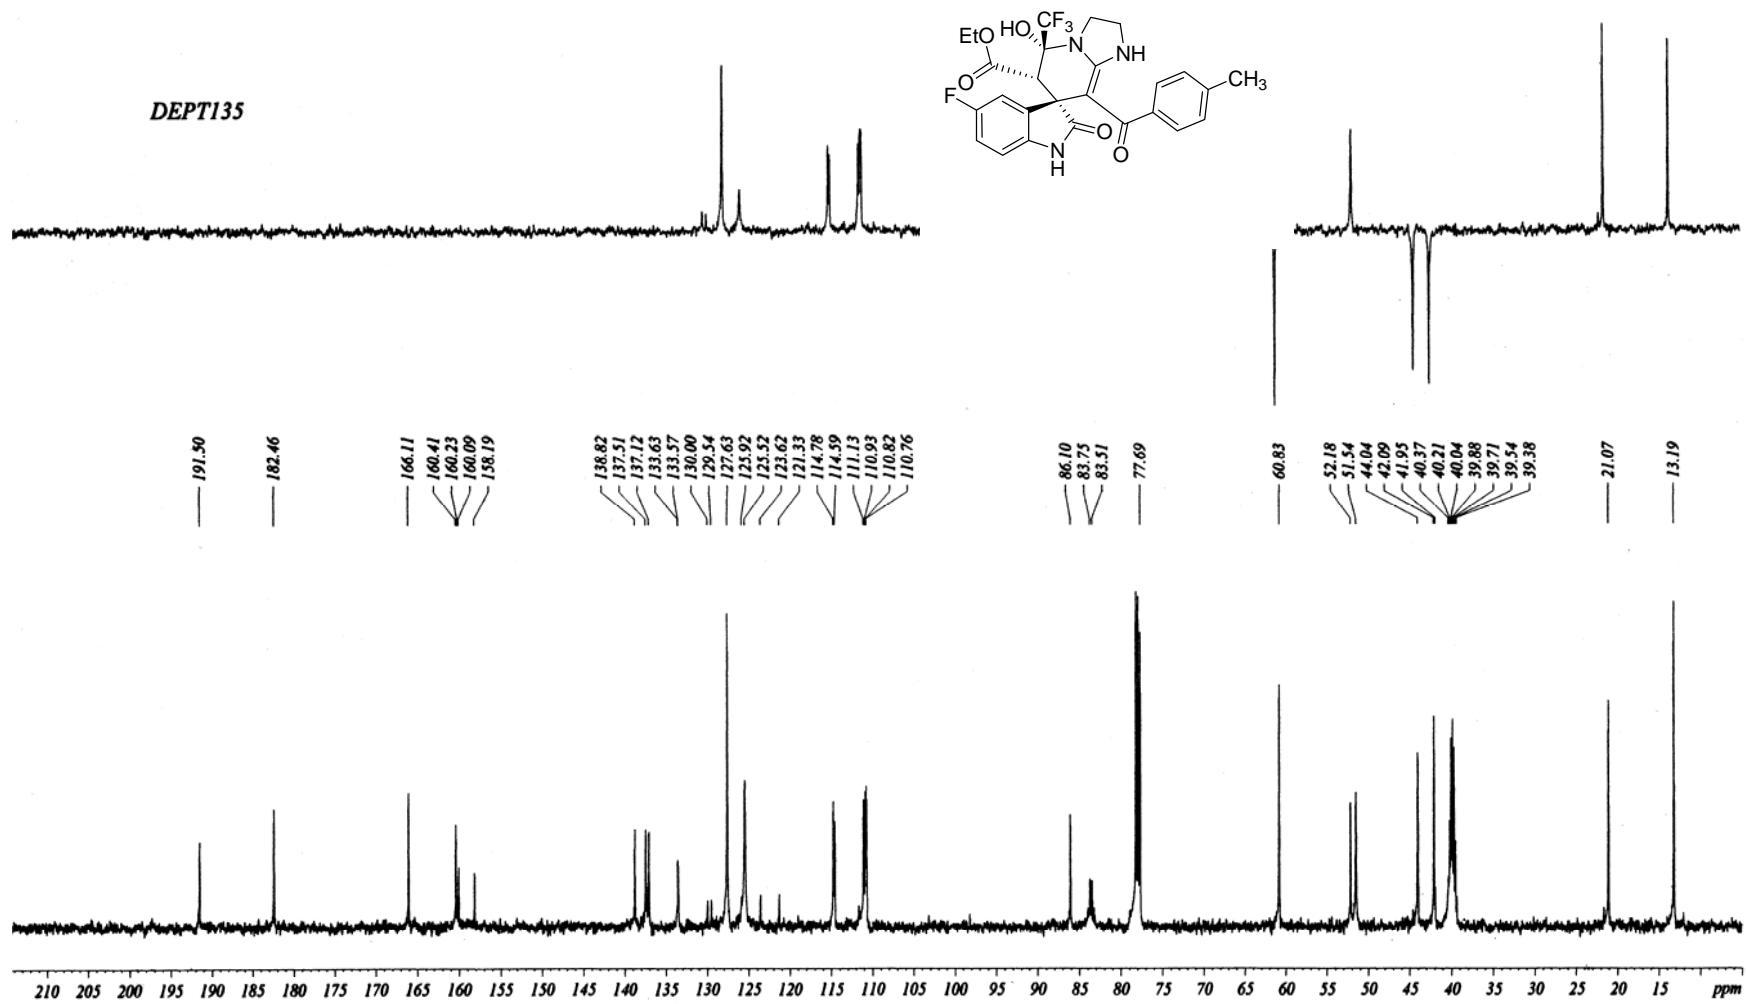

**Figure 14.** <sup>13</sup>C NMR (125 MHz, CDCl<sub>3</sub> + DMSO-*d*<sub>6</sub>) spectra of compound **5g**

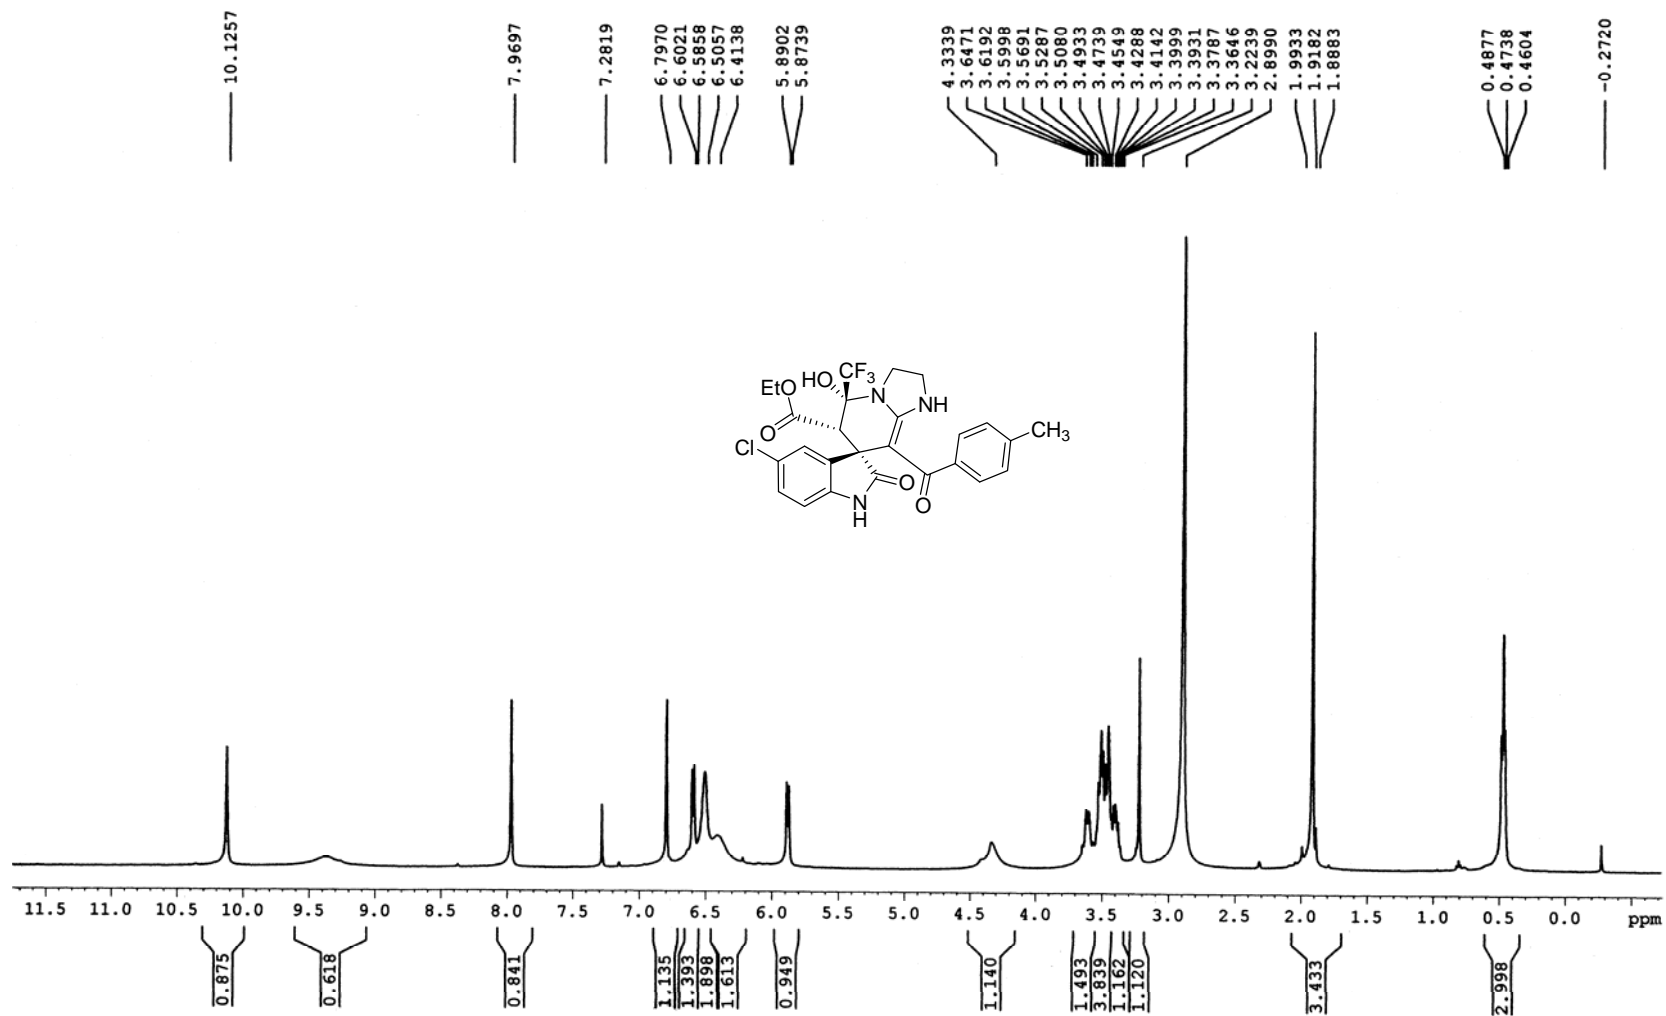

**Figure 15.**  $^1\text{H NMR}$  (500 MHz,  $\text{CDCl}_3 + \text{DMSO-}d_6$ ) spectra of compound **5h**

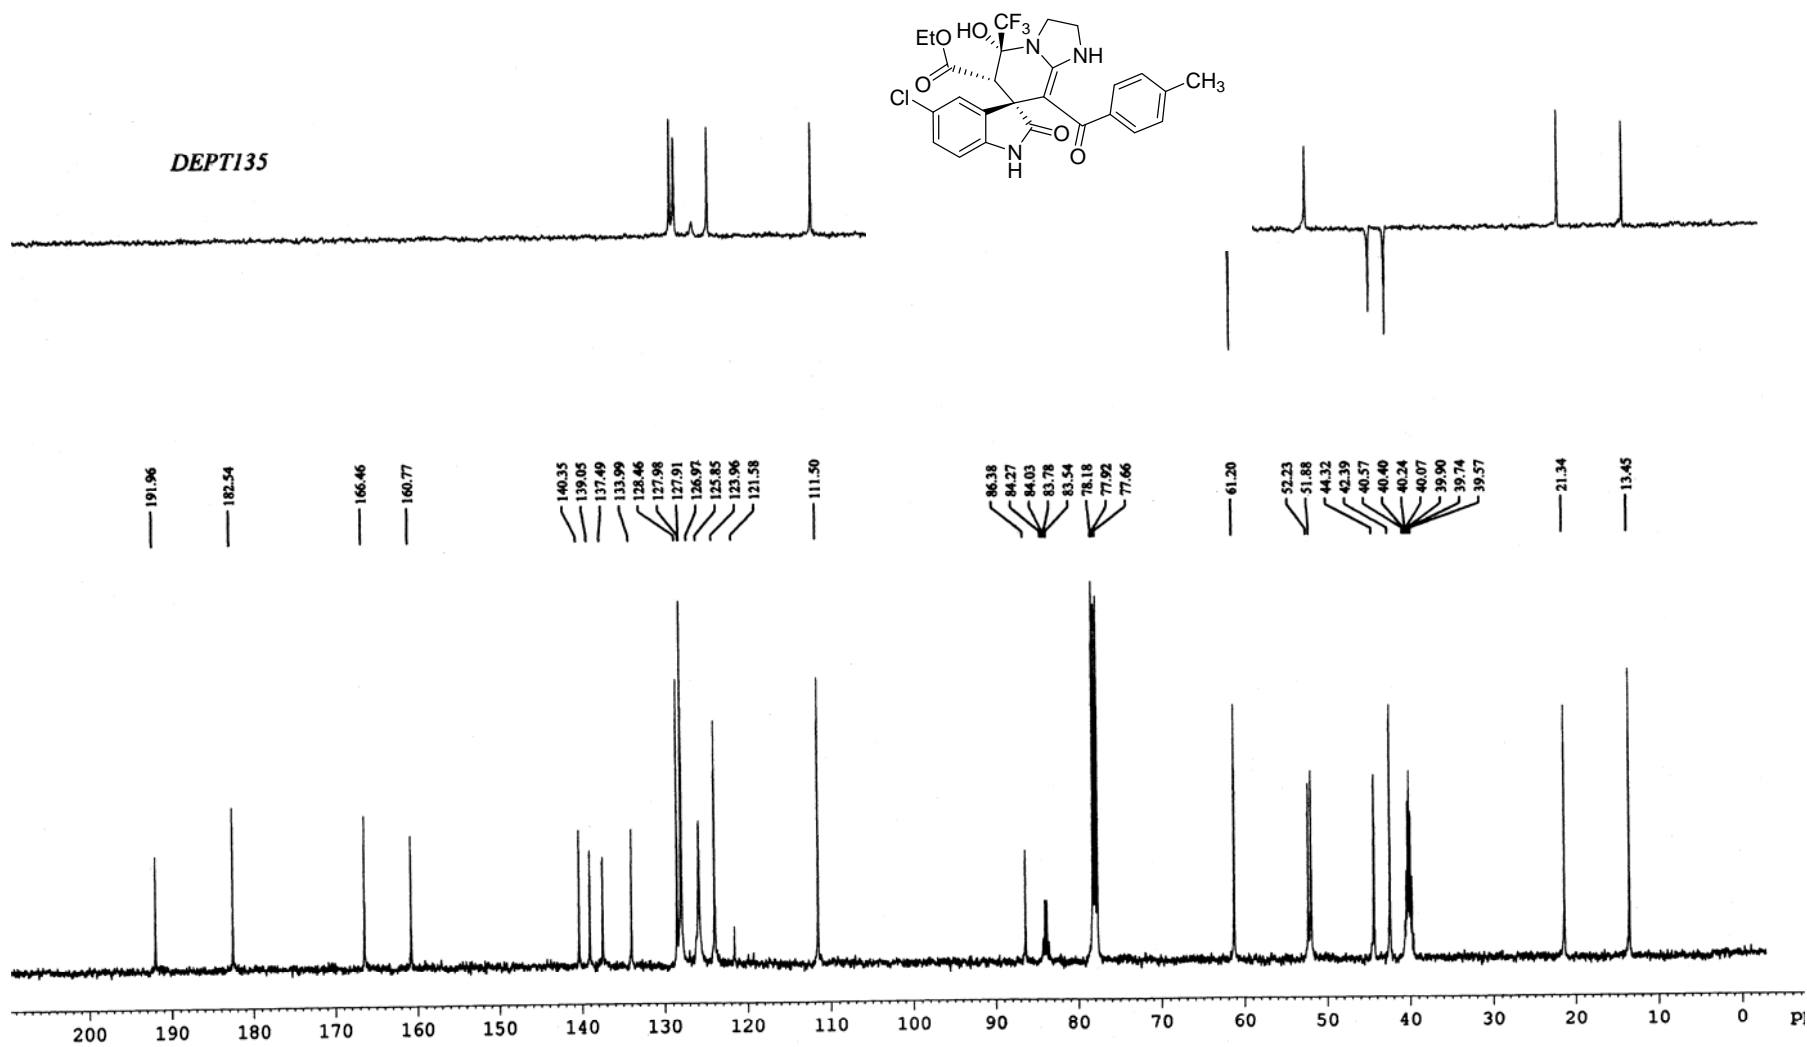

**Figure 16.**  $^{13}\text{C}$  NMR (125 MHz,  $\text{CDCl}_3 + \text{DMSO-}d_6$ ) spectra of compound **5h**

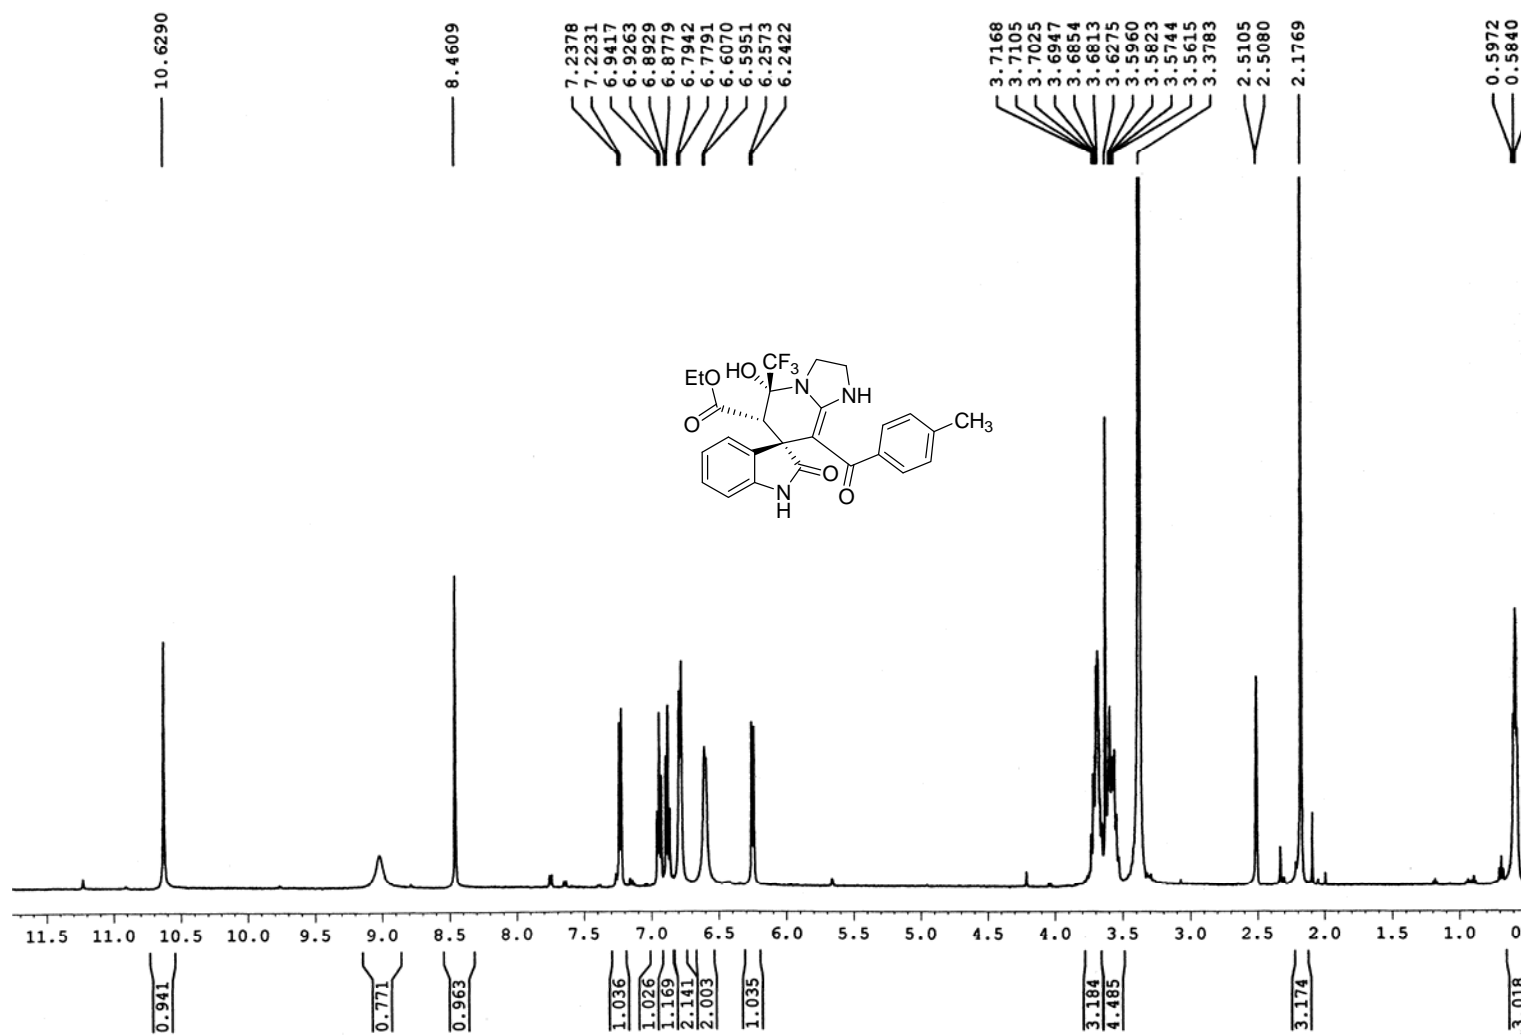

Figure 17.  $^1\text{H}$  NMR (500 MHz,  $\text{DMSO-}d_6$ ) spectra of compound 5i

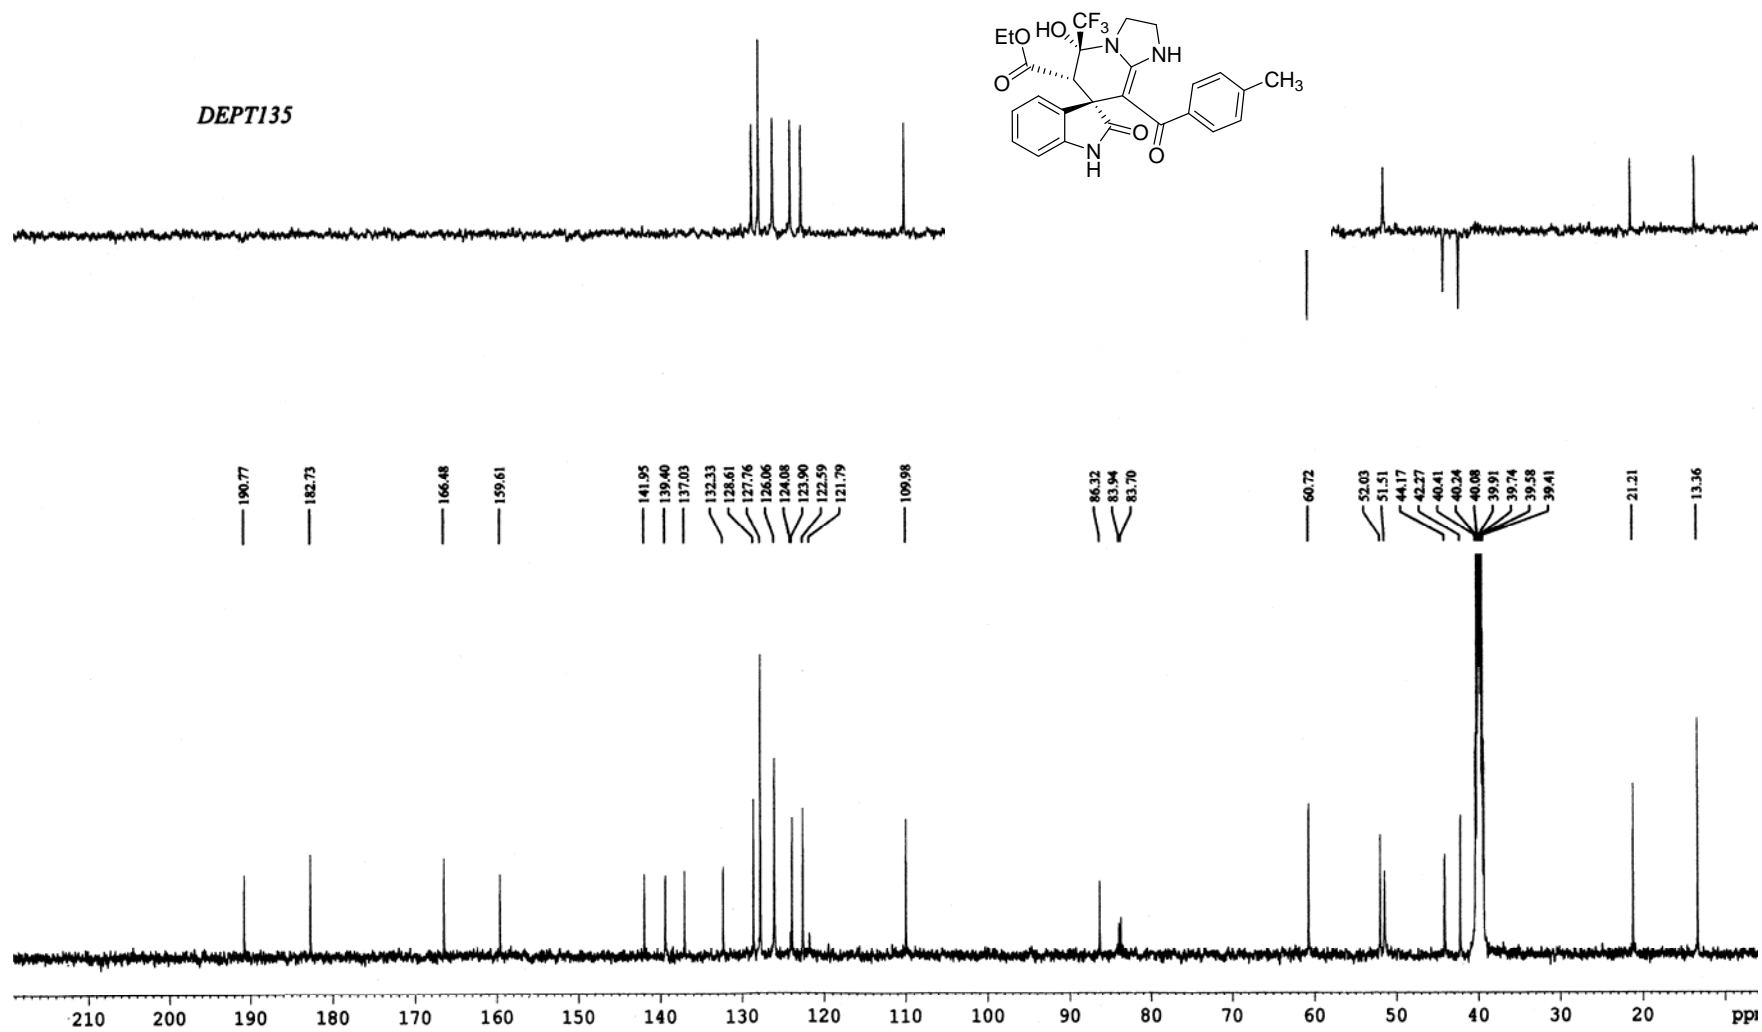

Figure 18.  $^{13}\text{C}$  NMR (125 MHz,  $\text{DMSO-}d_6$ ) spectra of compound 5i

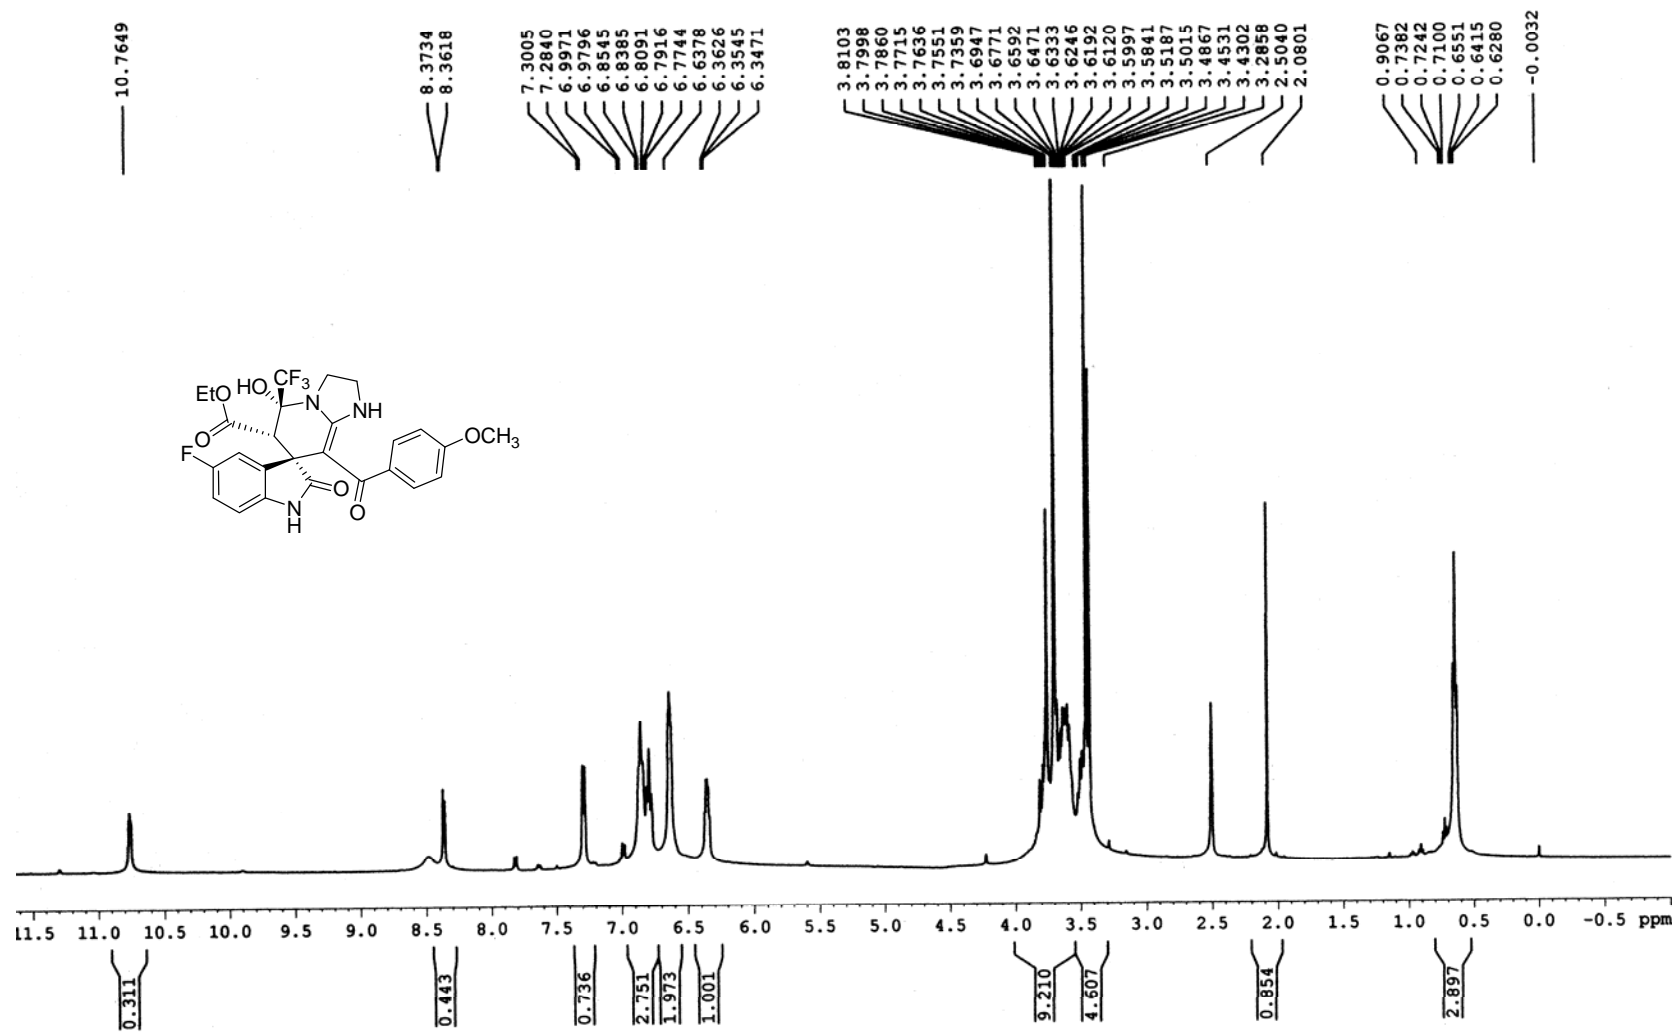

Figure 19.  $^1\text{H}$  NMR (500 MHz,  $\text{DMSO-}d_6$ ) spectra of compound 5j

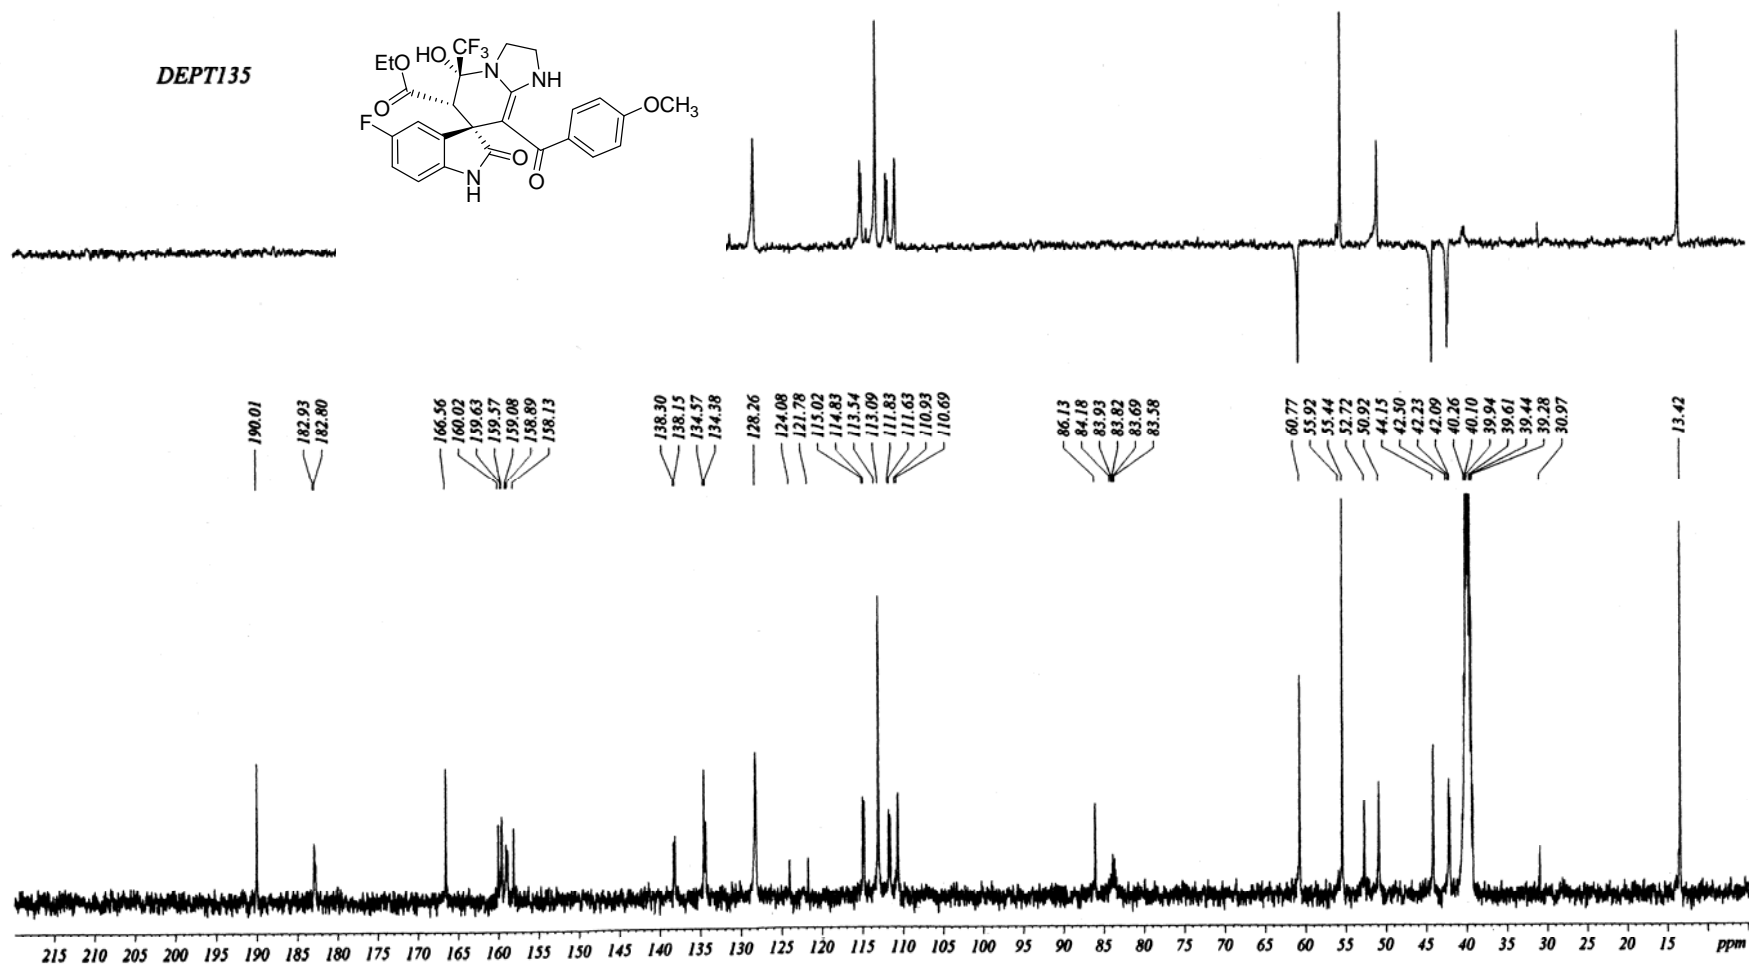

**Figure 20.** <sup>13</sup>C NMR (125 MHz, DMSO-*d*<sub>6</sub>) spectra of compound 5j



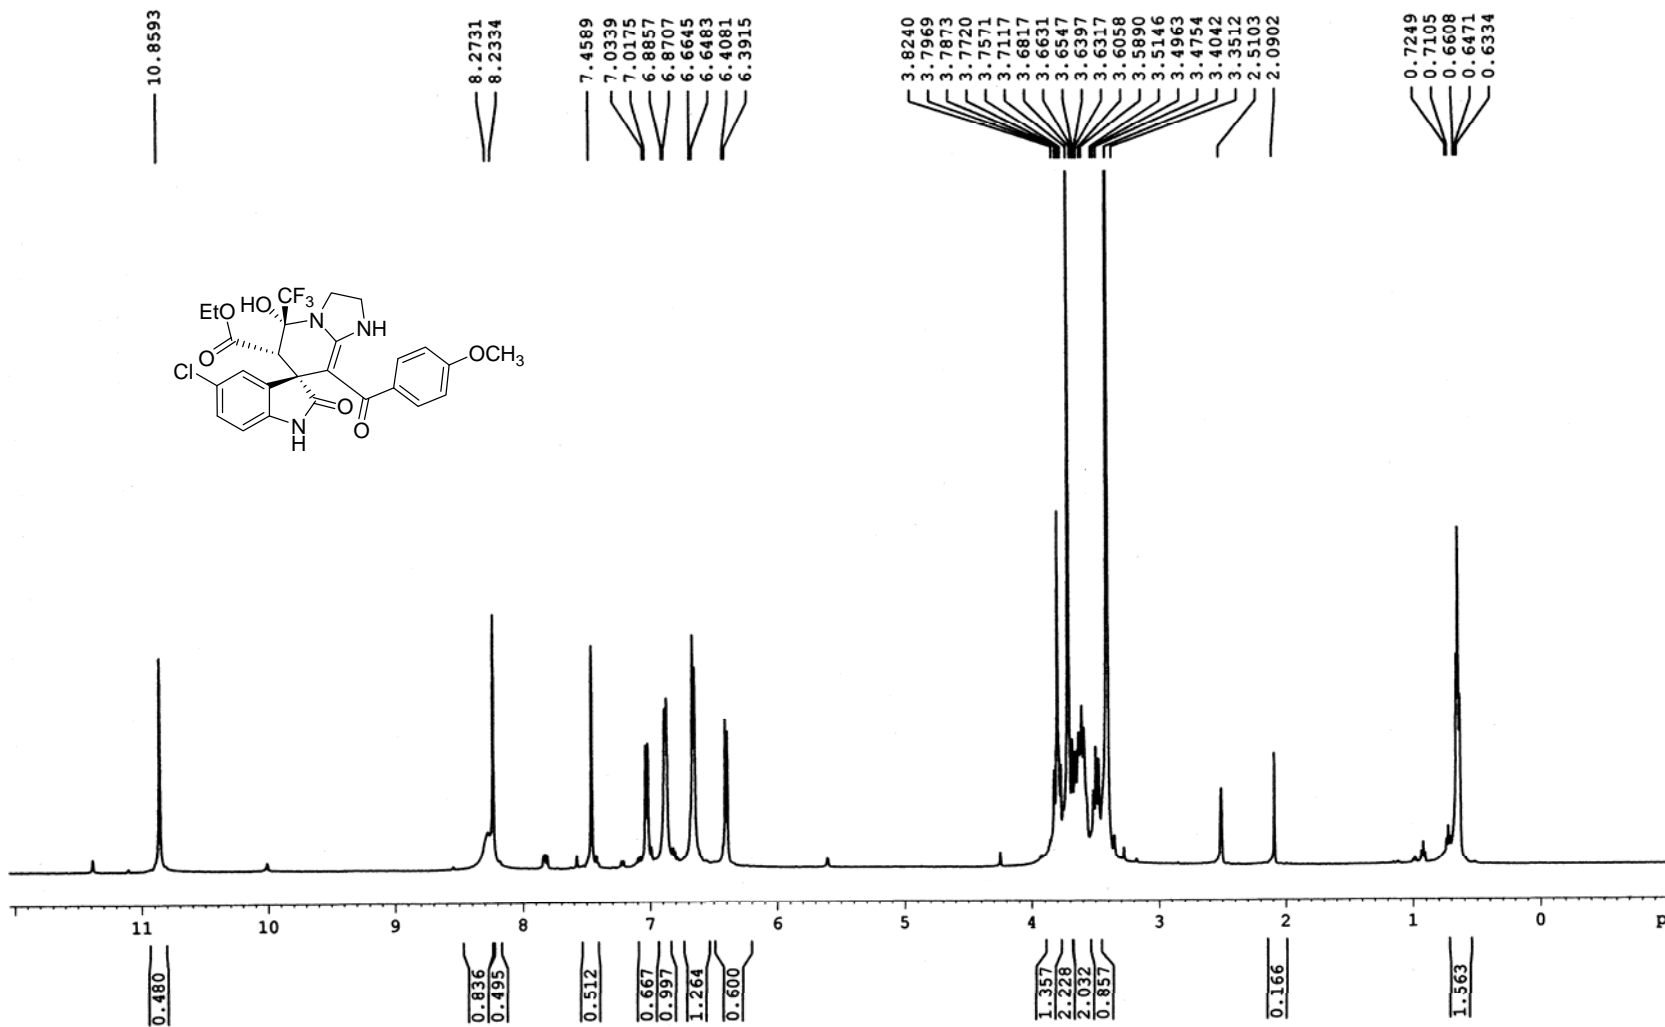

Figure 21. <sup>1</sup>H NMR (500 MHz, DMSO-*d*<sub>6</sub>) spectra of compound **5k**

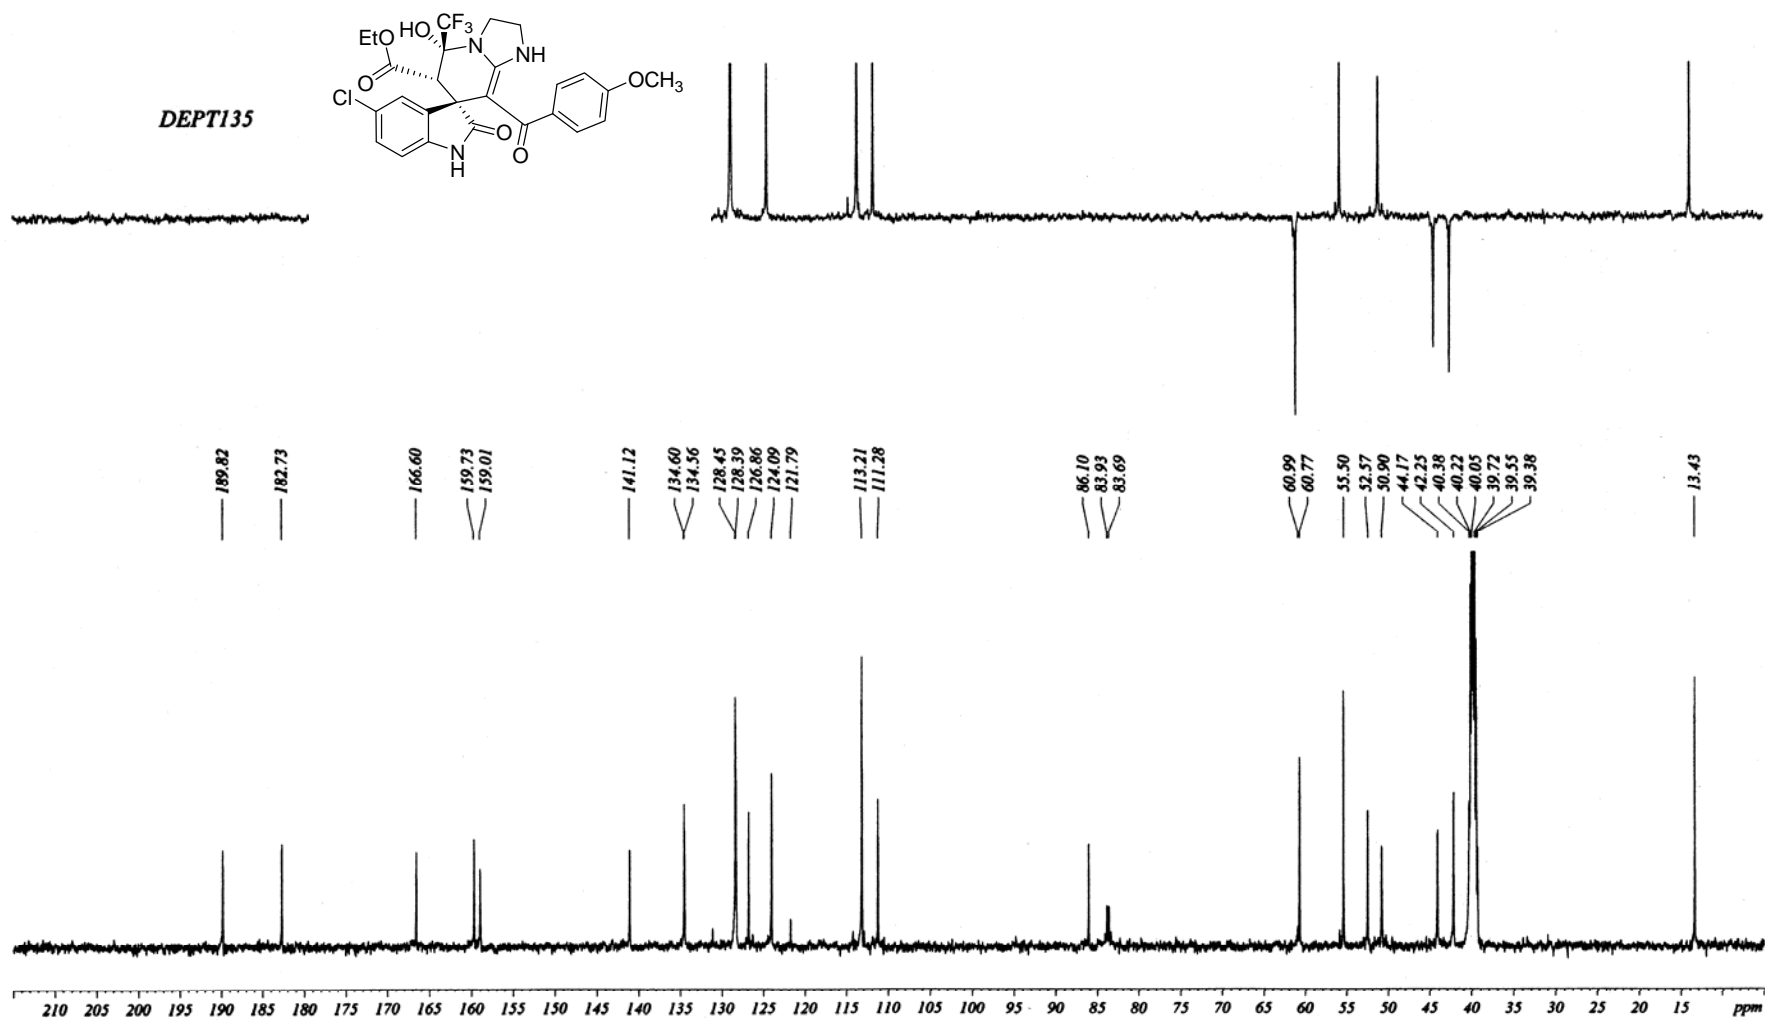

**Figure 22.**  $^{13}\text{C}$  NMR (125 MHz,  $\text{DMSO}-d_6$ ) spectra of compound 5k

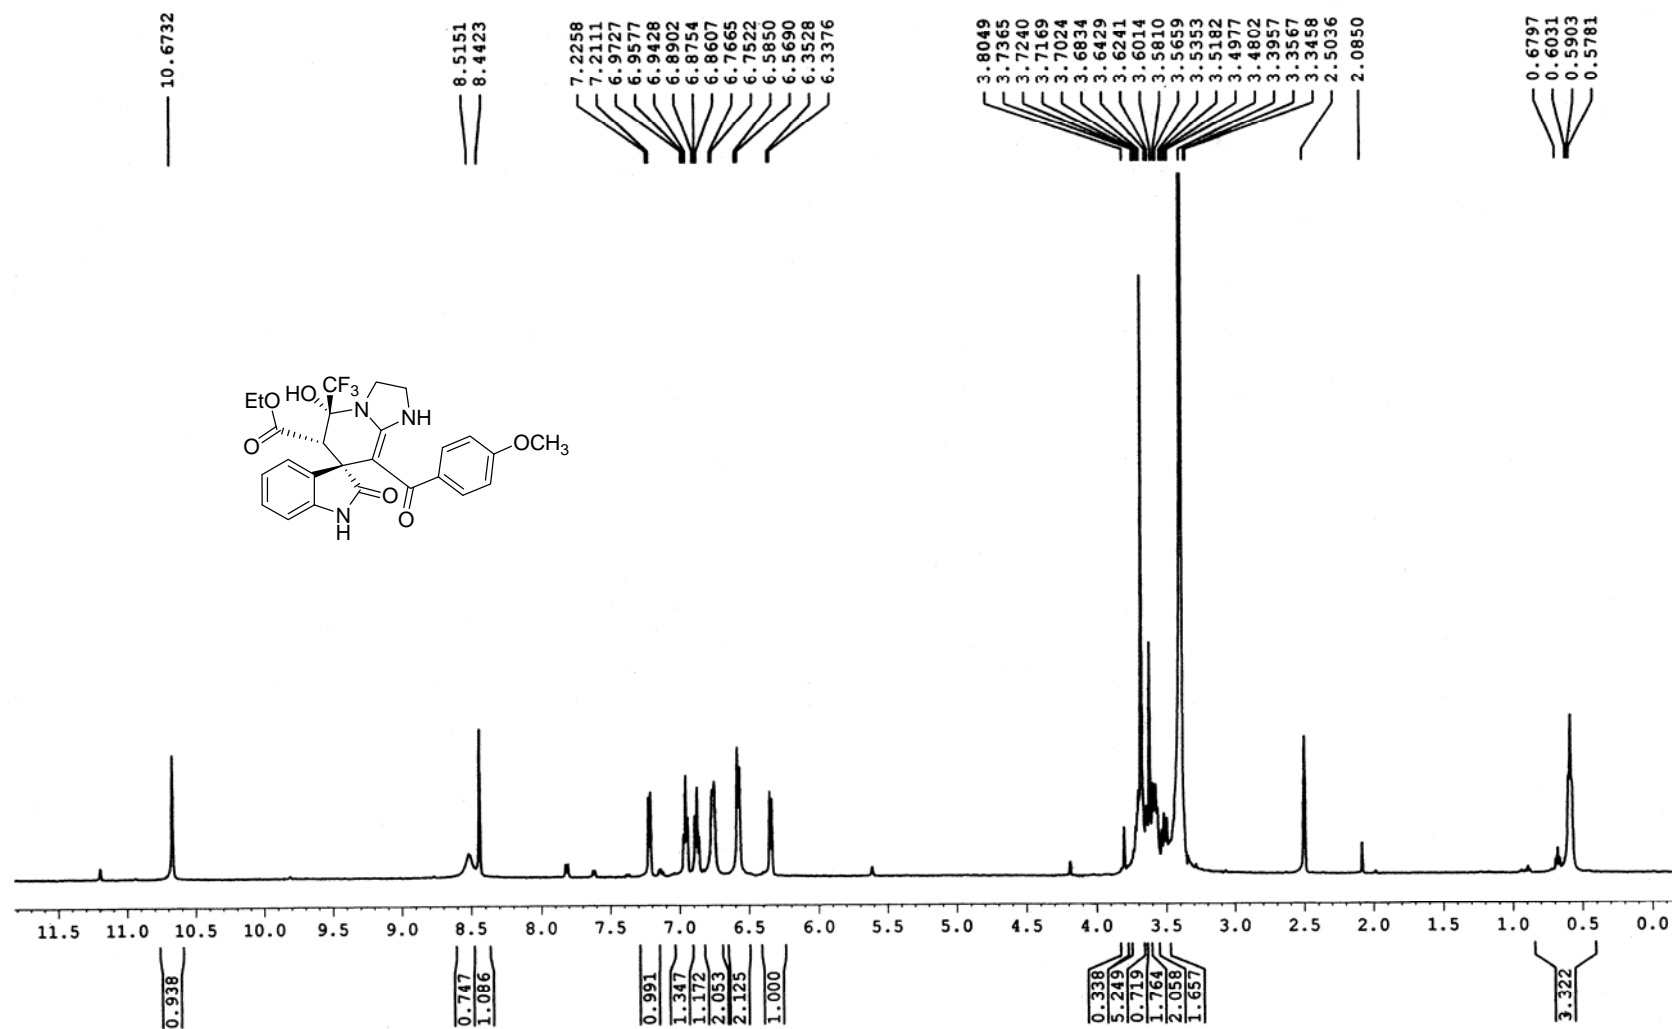

Figure 23. <sup>1</sup>H NMR (500 MHz, DMSO-*d*<sub>6</sub>) spectra of compound 51

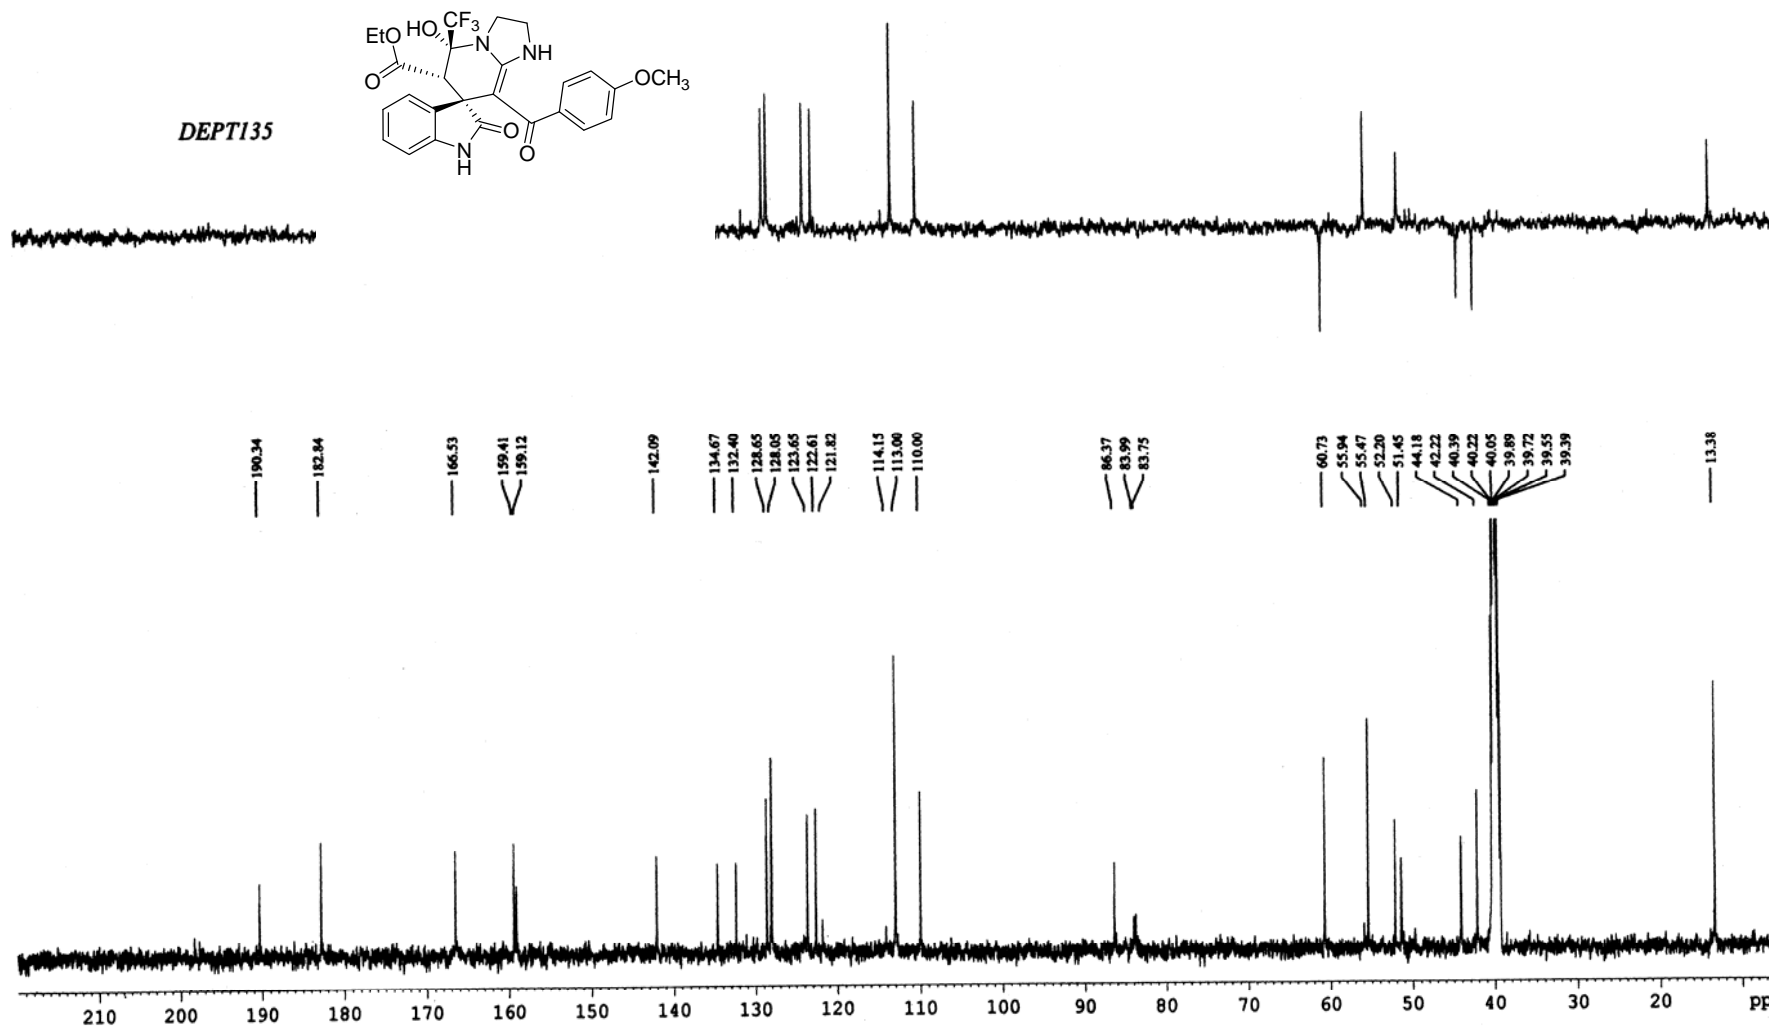

Figure 24.  $^{13}\text{C}$  NMR (125 MHz,  $\text{DMSO-}d_6$ ) spectra of compound 51

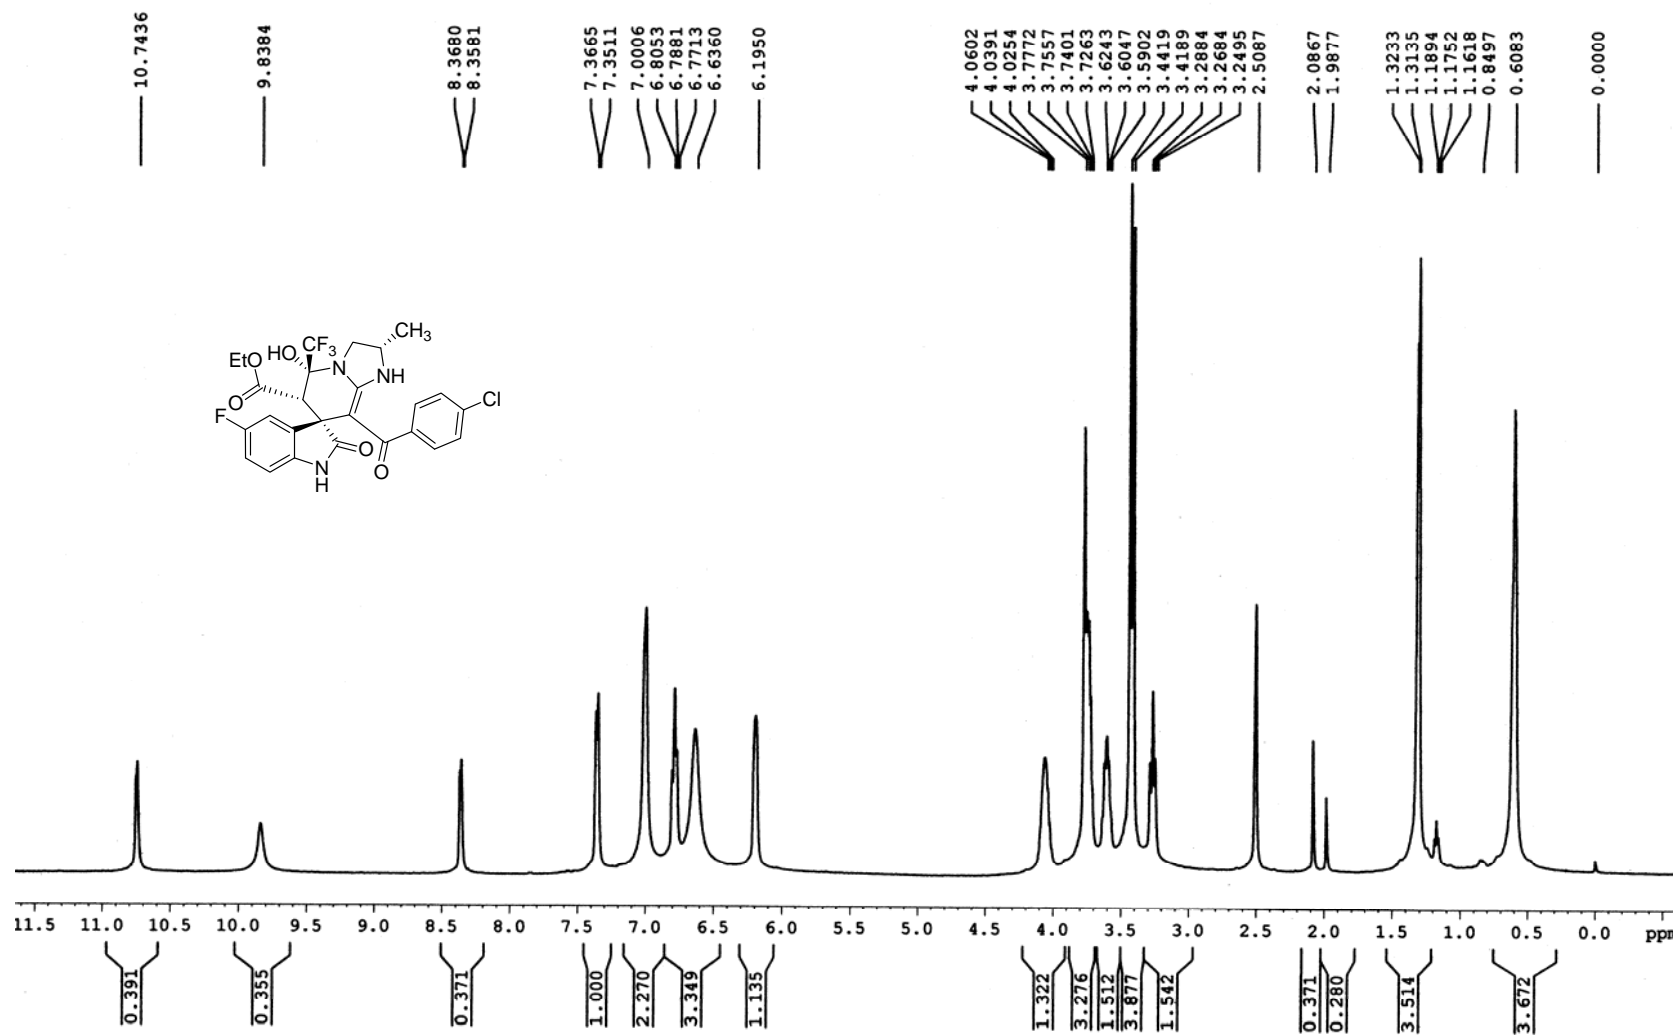

Figure 25.  $^1\text{H}$  NMR (500 MHz,  $\text{DMSO-}d_6$ ) spectra of compound **5m**

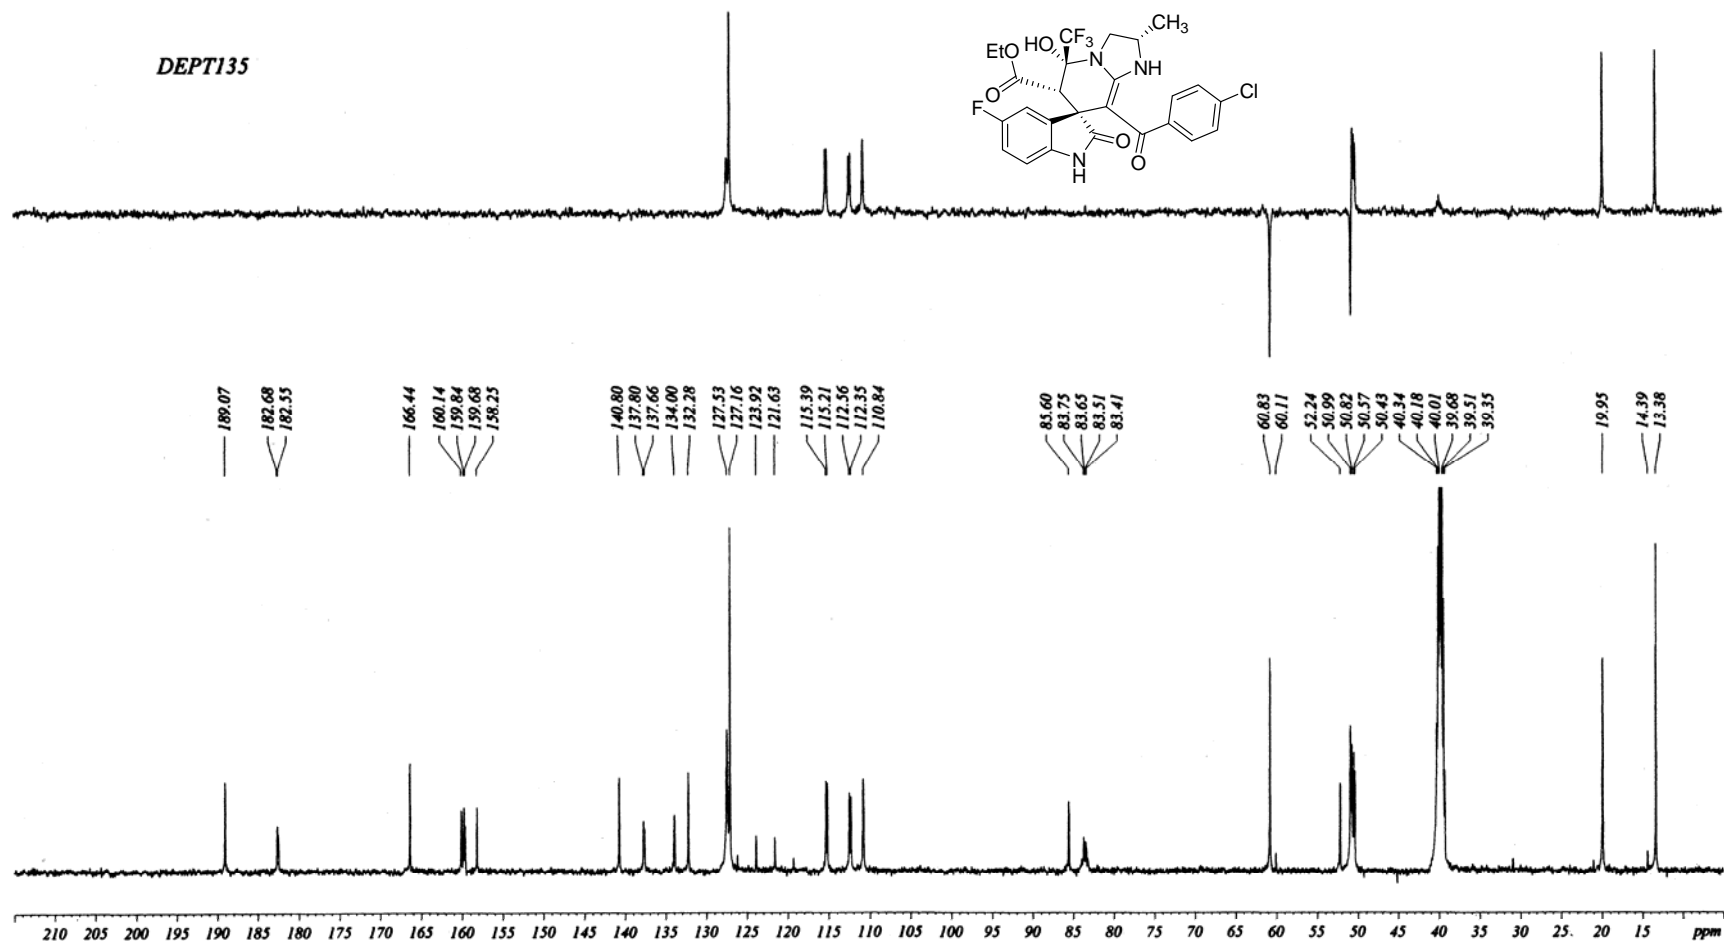

Figure 26. <sup>13</sup>C NMR (125 MHz, DMSO-*d*<sub>6</sub>) spectra of compound **5m**

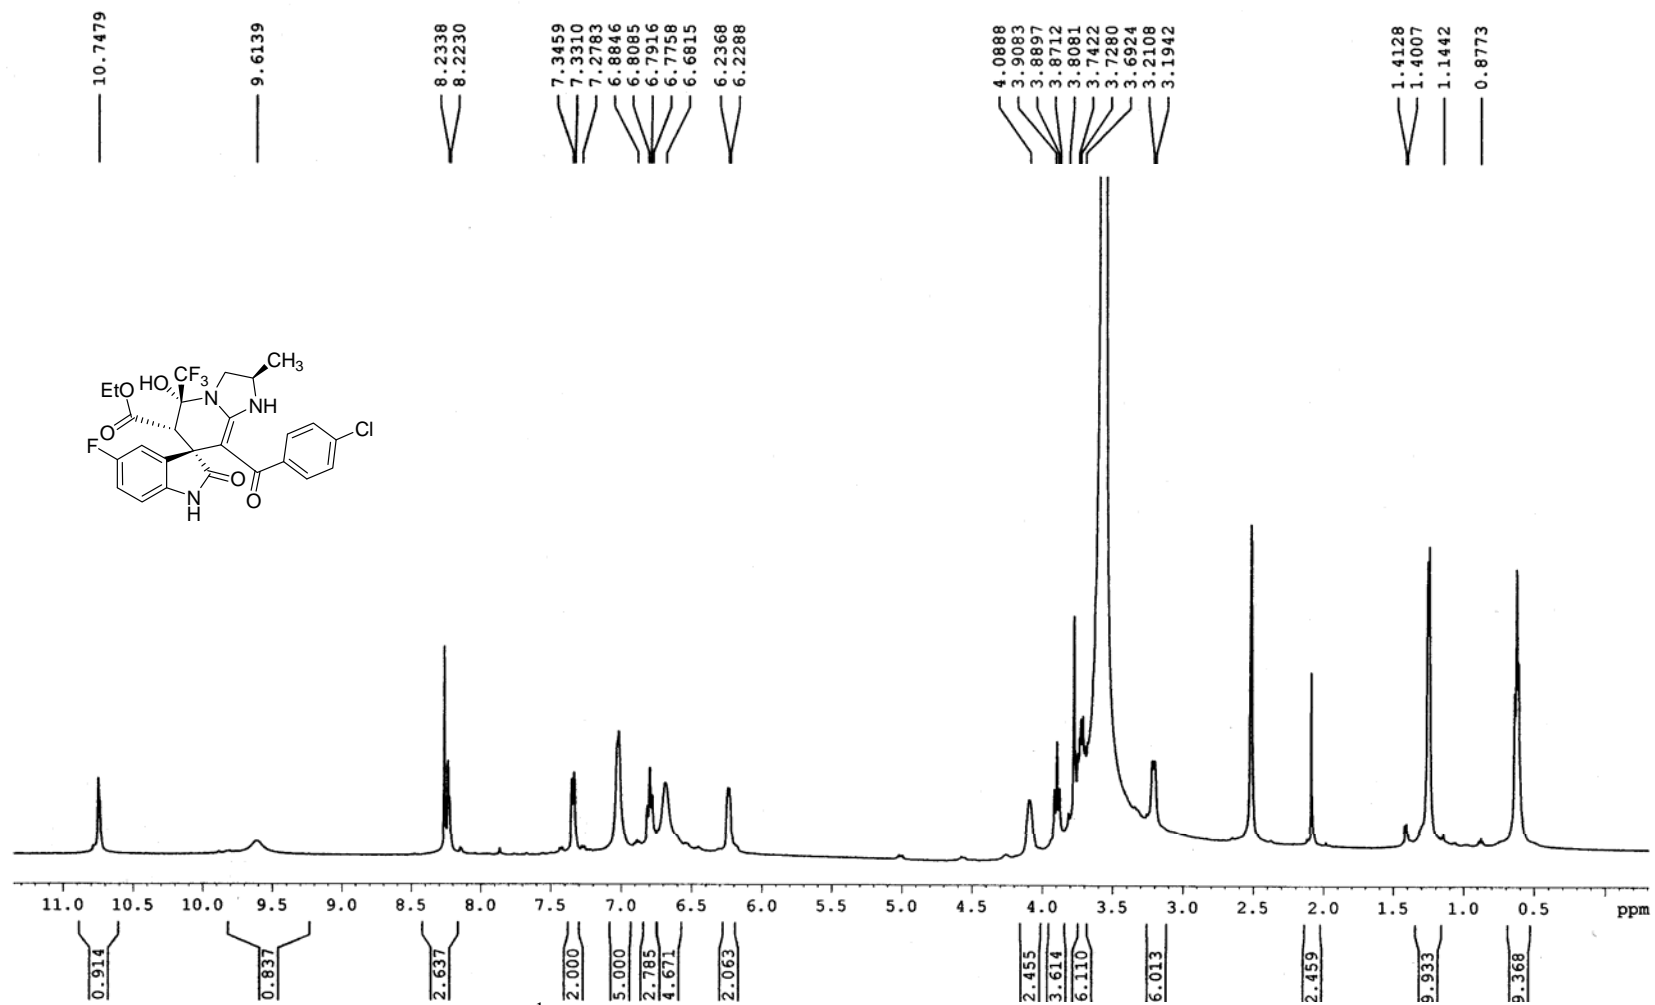

Figure 27. <sup>1</sup>H NMR (500 MHz, DMSO-*d*<sub>6</sub>) spectra of compound **5m'**

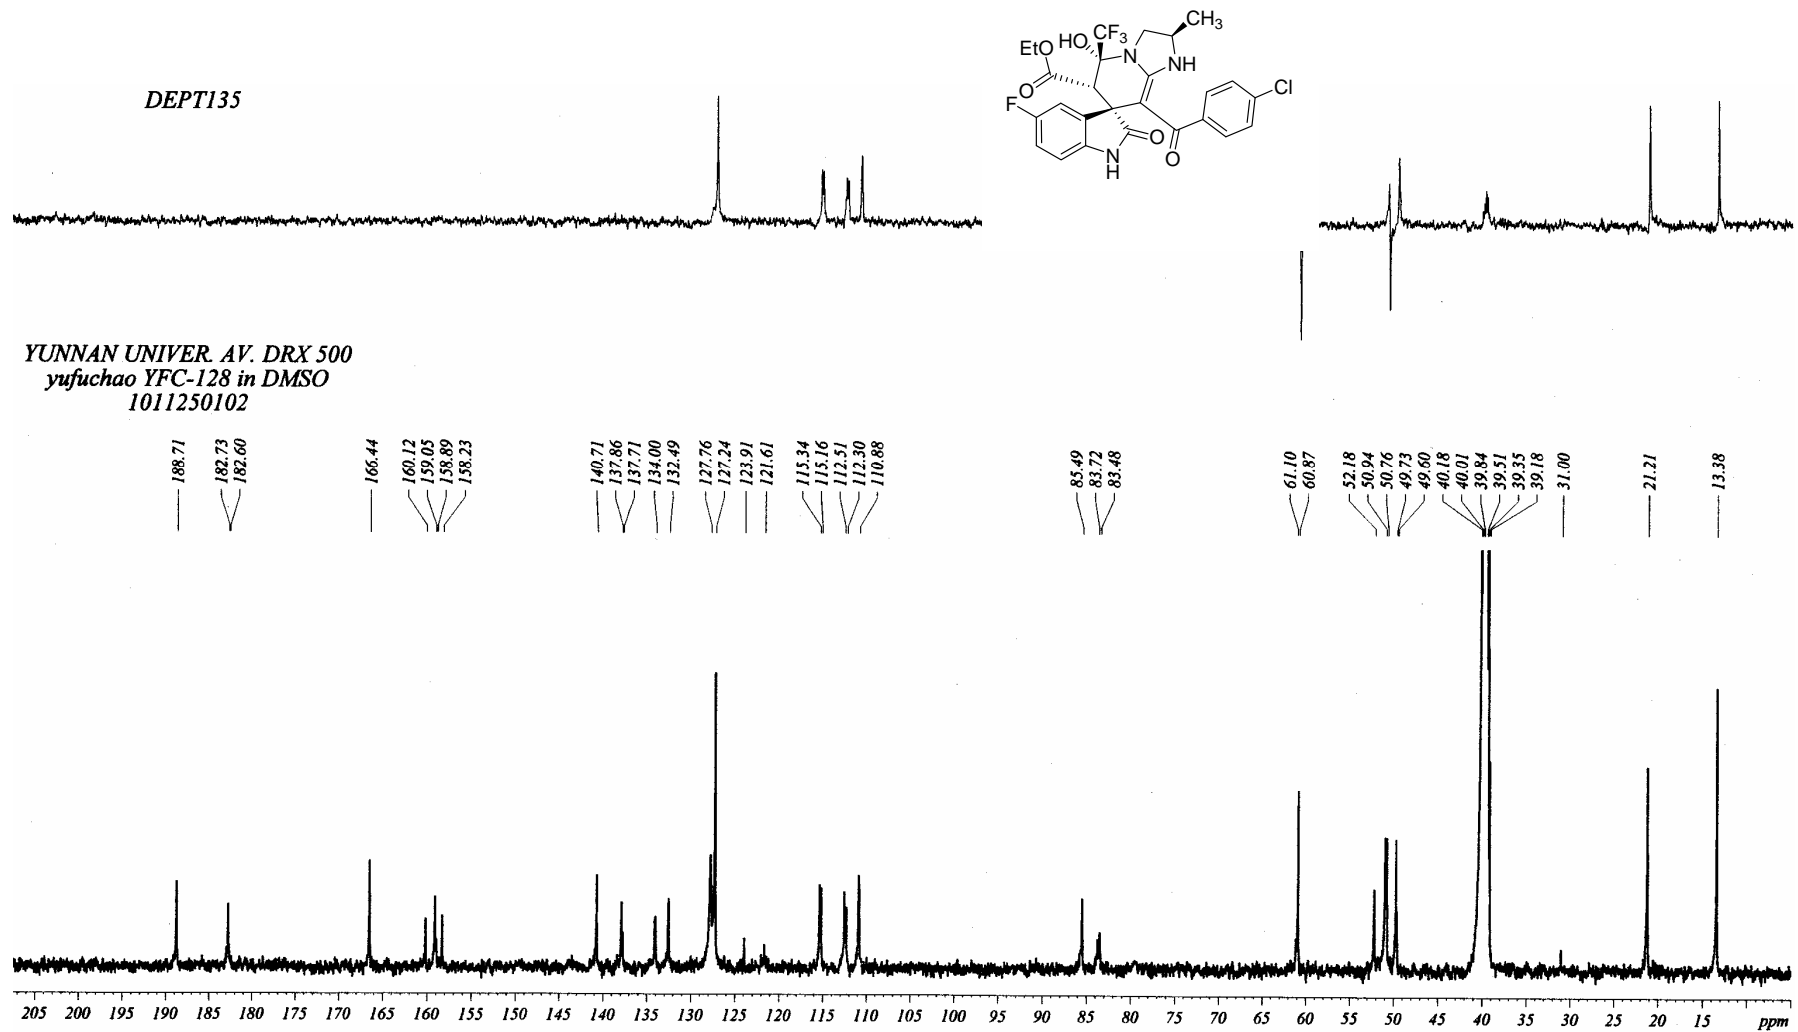

Figure 28.  $^{13}\text{C}$  NMR (125 MHz,  $\text{DMSO-}d_6$ ) spectra of compound **5m'**



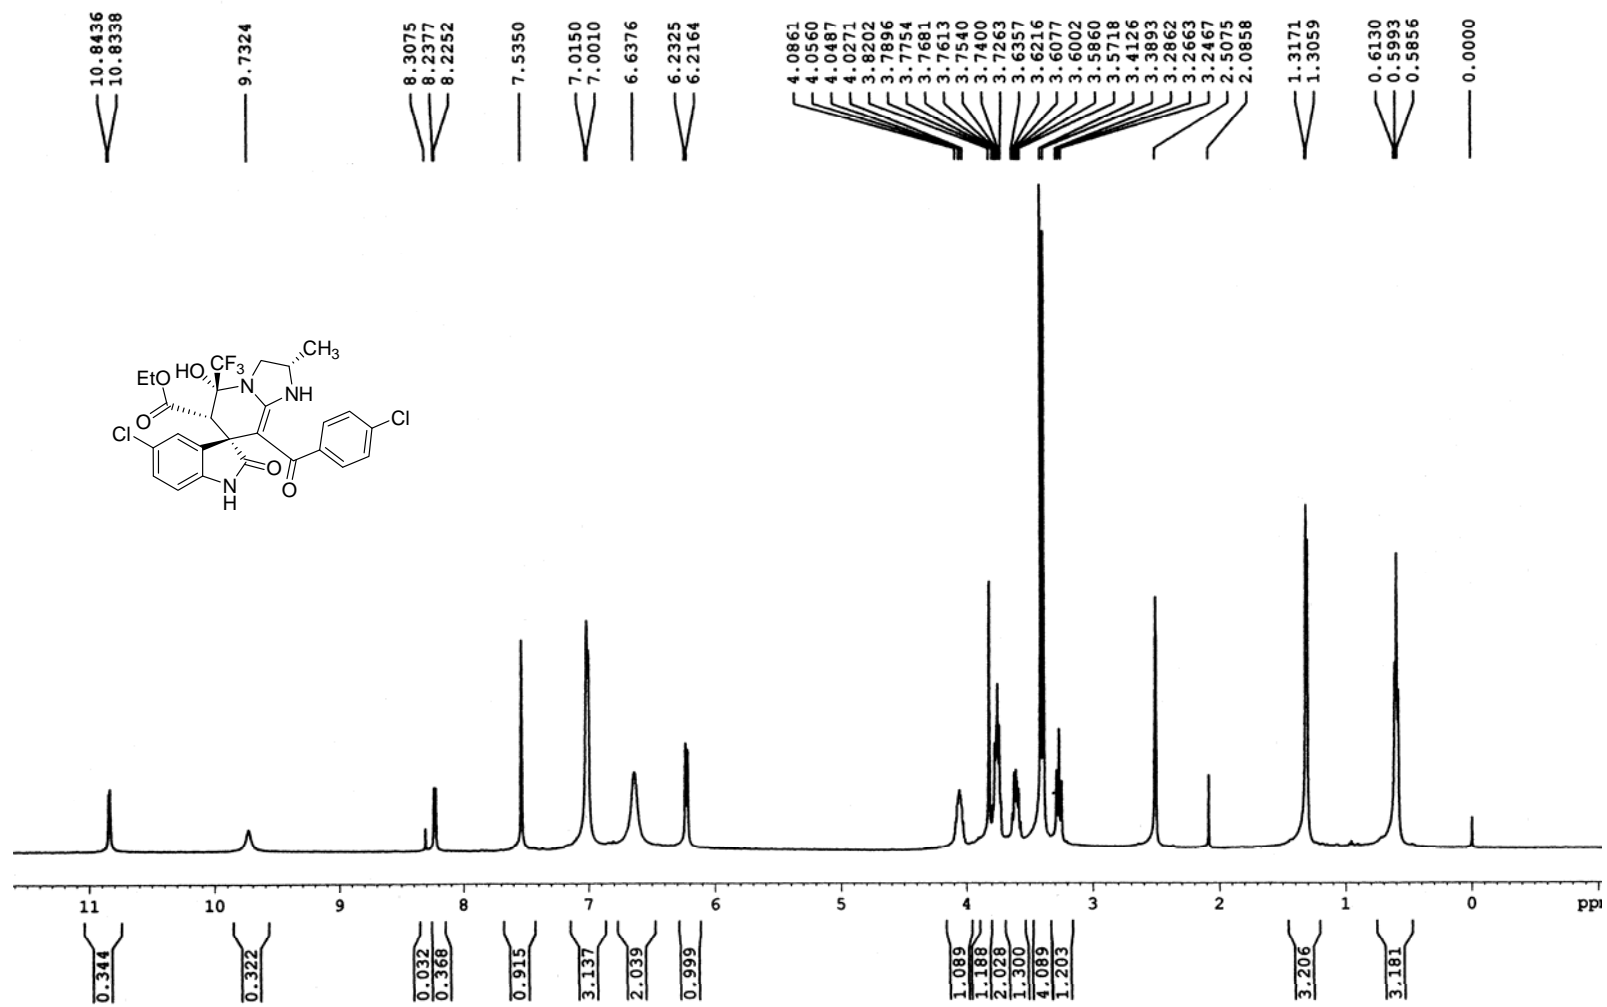

Figure 29. <sup>1</sup>H NMR (500 MHz, DMSO-*d*<sub>6</sub>) spectra of compound 5n

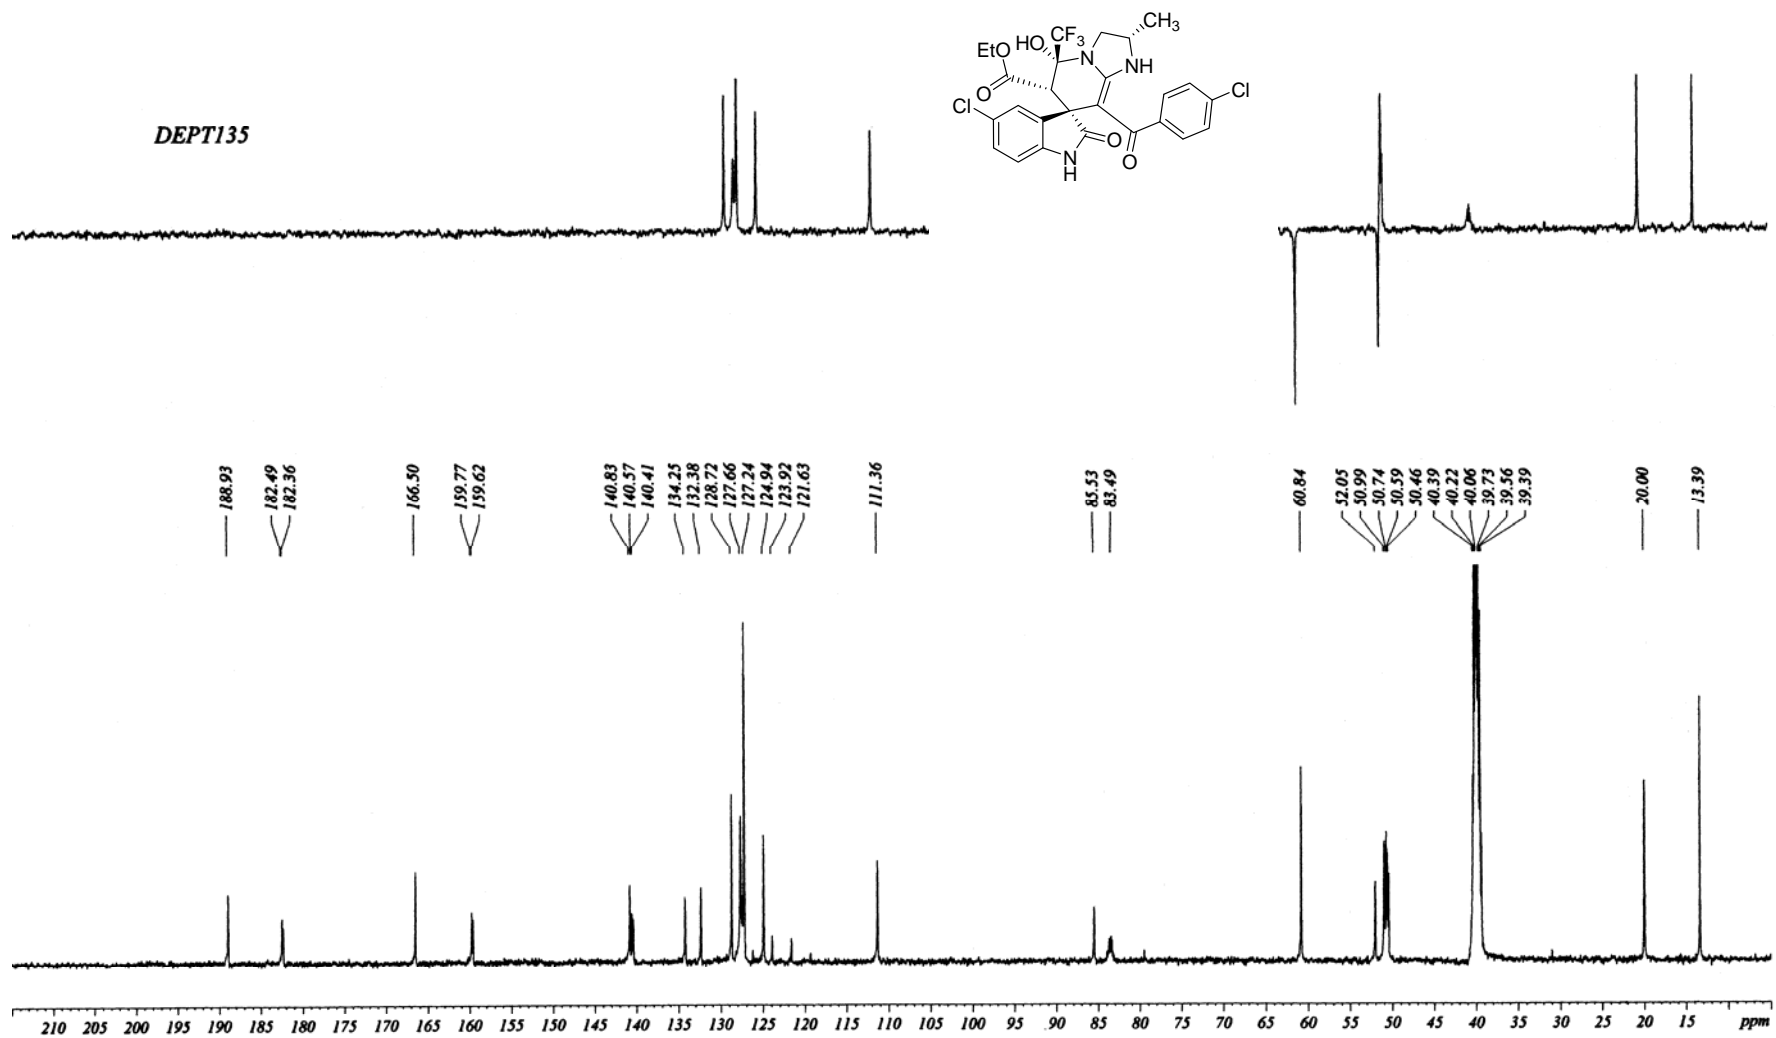

Figure 30.  $^{13}\text{C}$  NMR (125 MHz, DMSO- $d_6$ ) spectra of compound 5n

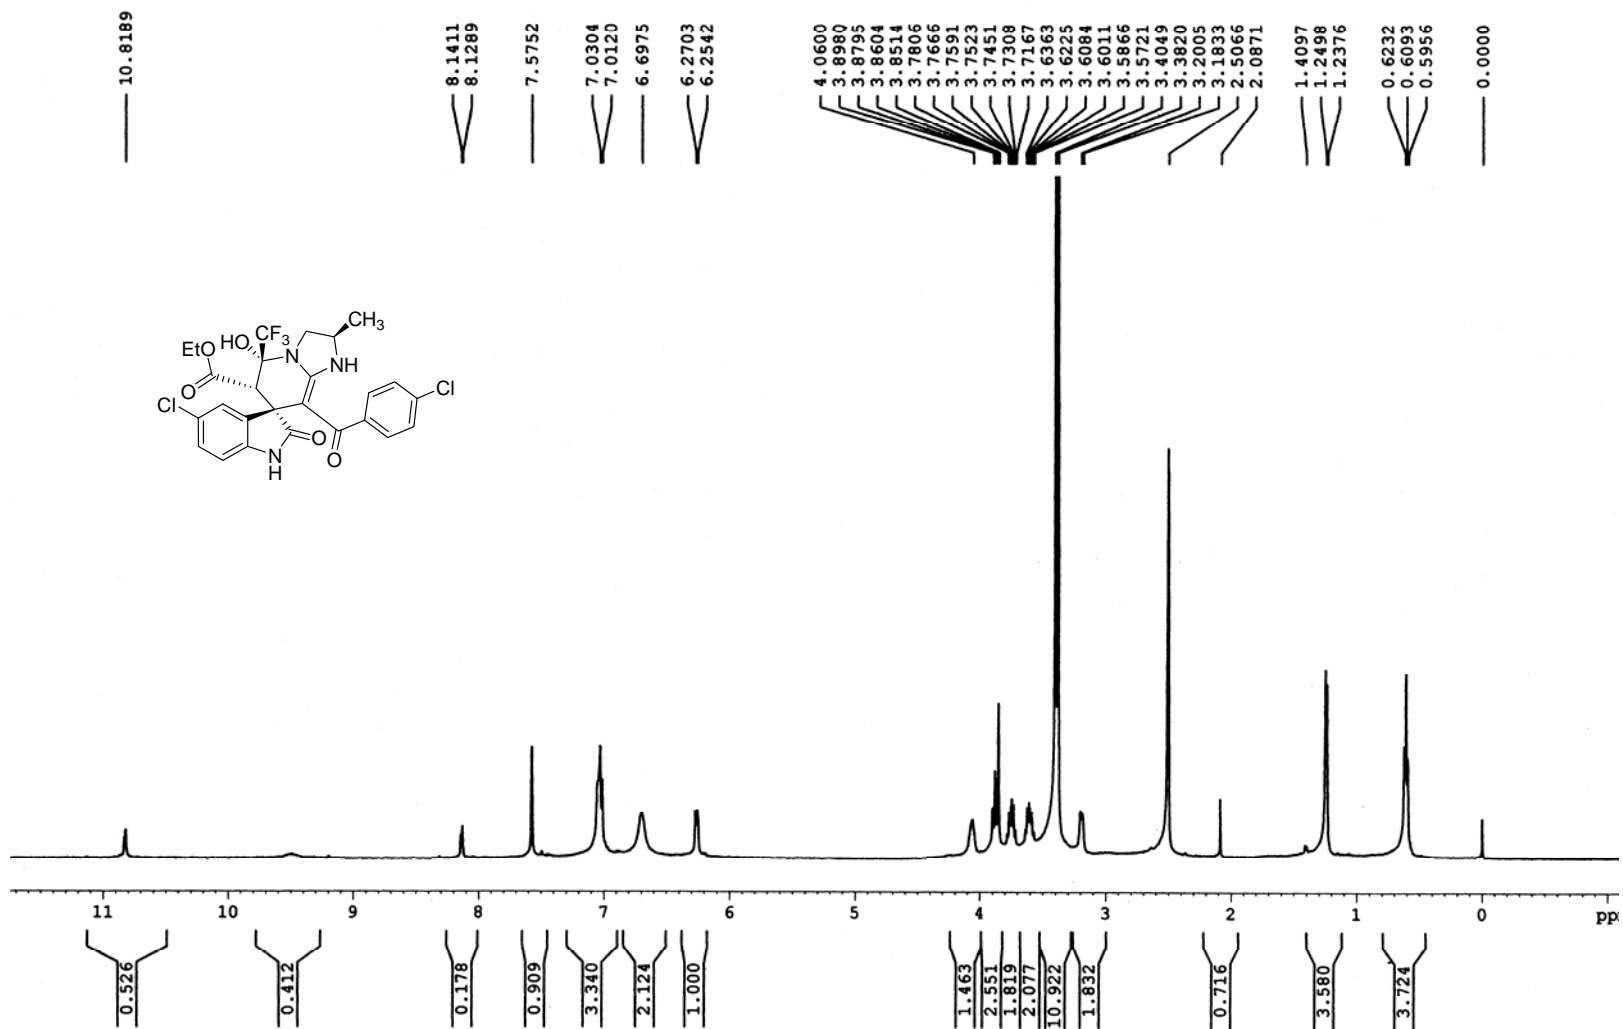

Figure 31. <sup>1</sup>H NMR (500 MHz, DMSO-*d*<sub>6</sub>) spectra of compound **5n'**

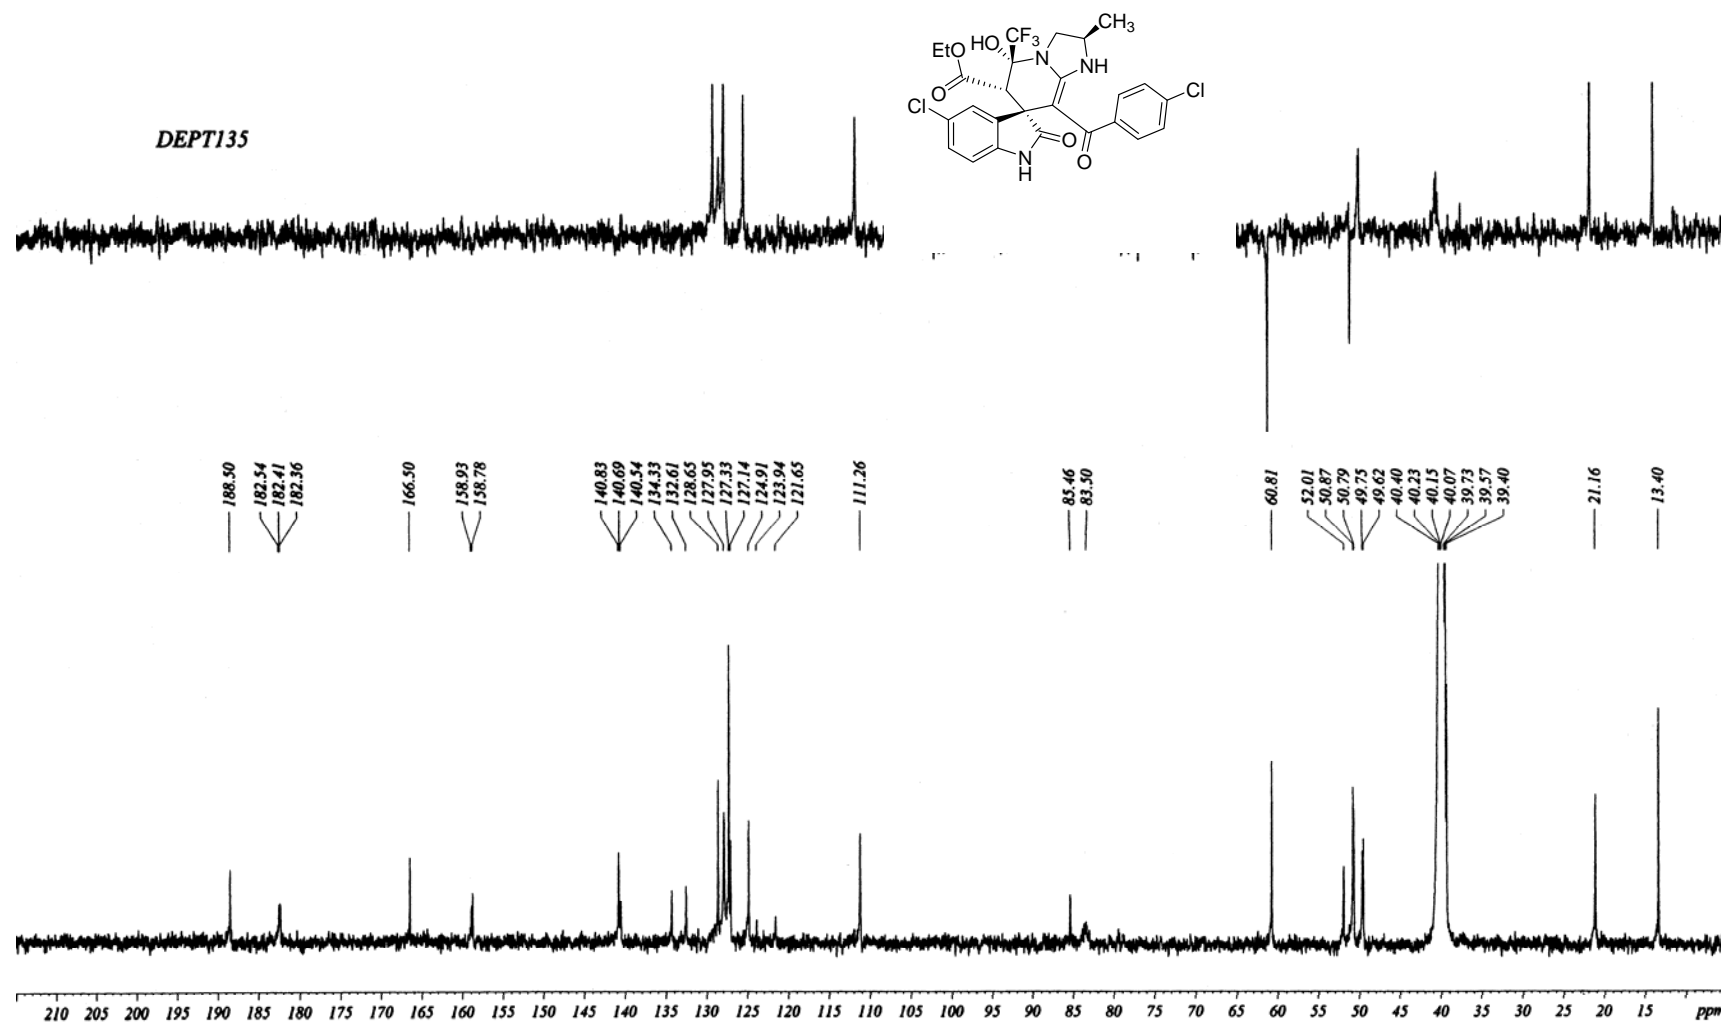

Figure 32.  $^{13}\text{C}$  NMR (125 MHz,  $\text{DMSO}-d_6$ ) spectra of compound 5n'

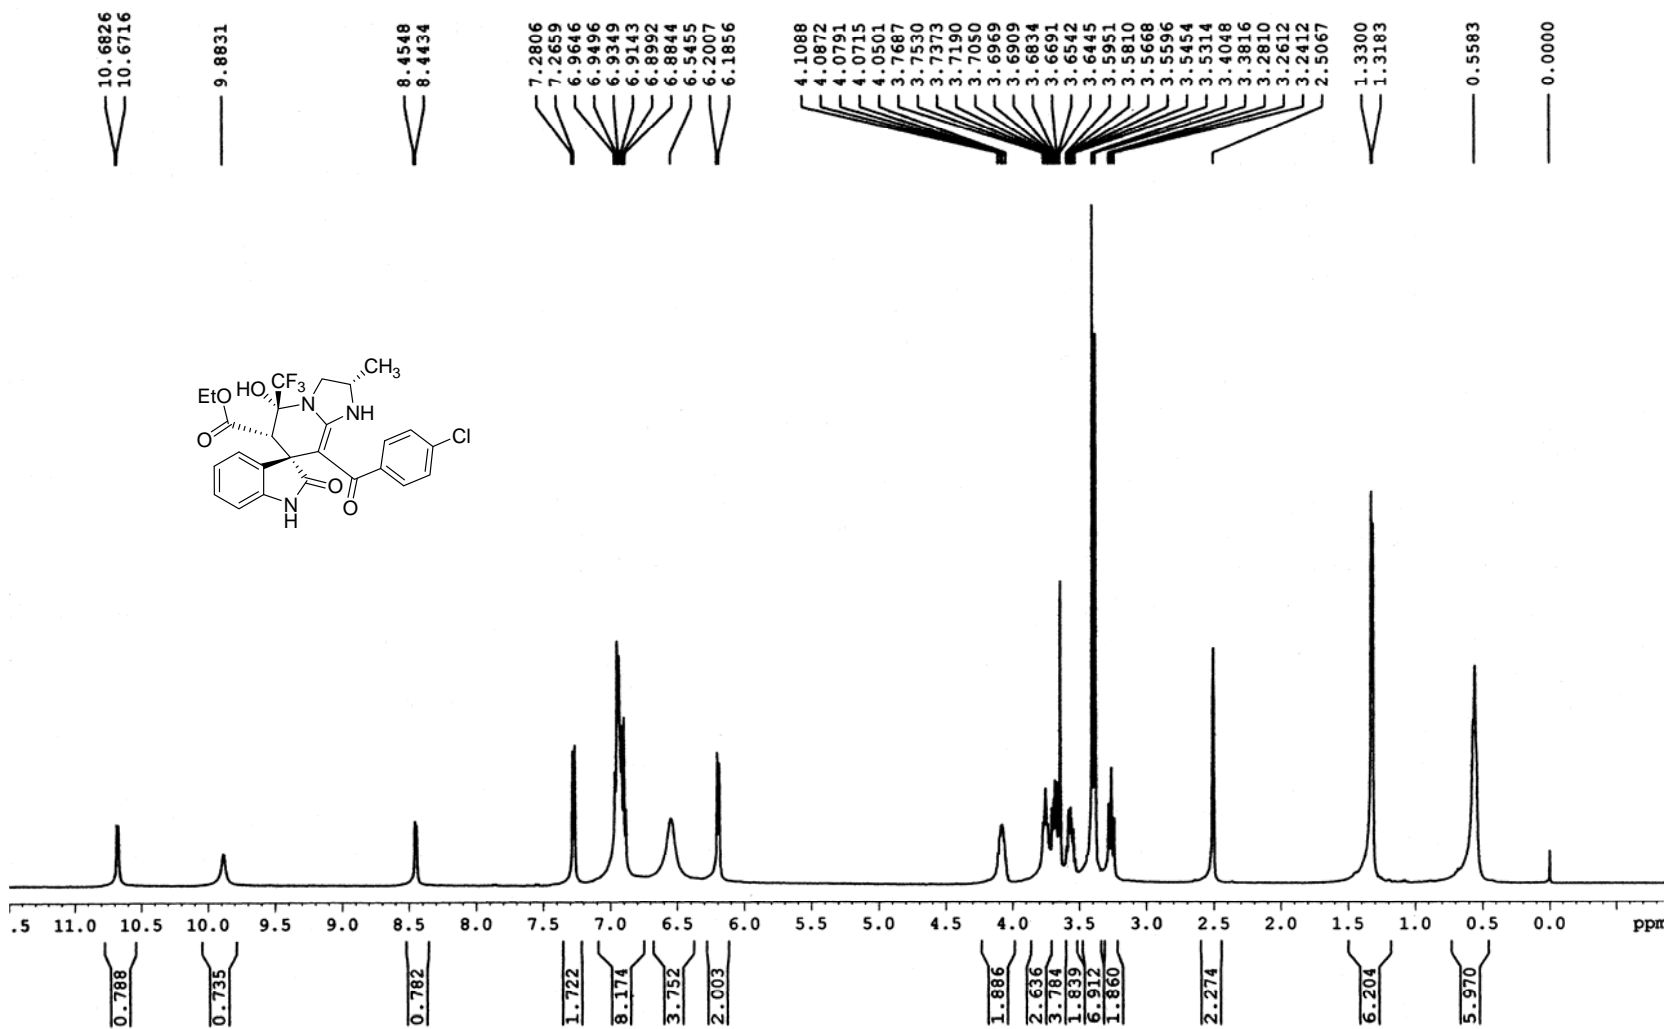

Figure 33. <sup>1</sup>H NMR (500 MHz, DMSO-*d*<sub>6</sub> + HClO<sub>4</sub>) spectra of compound 50

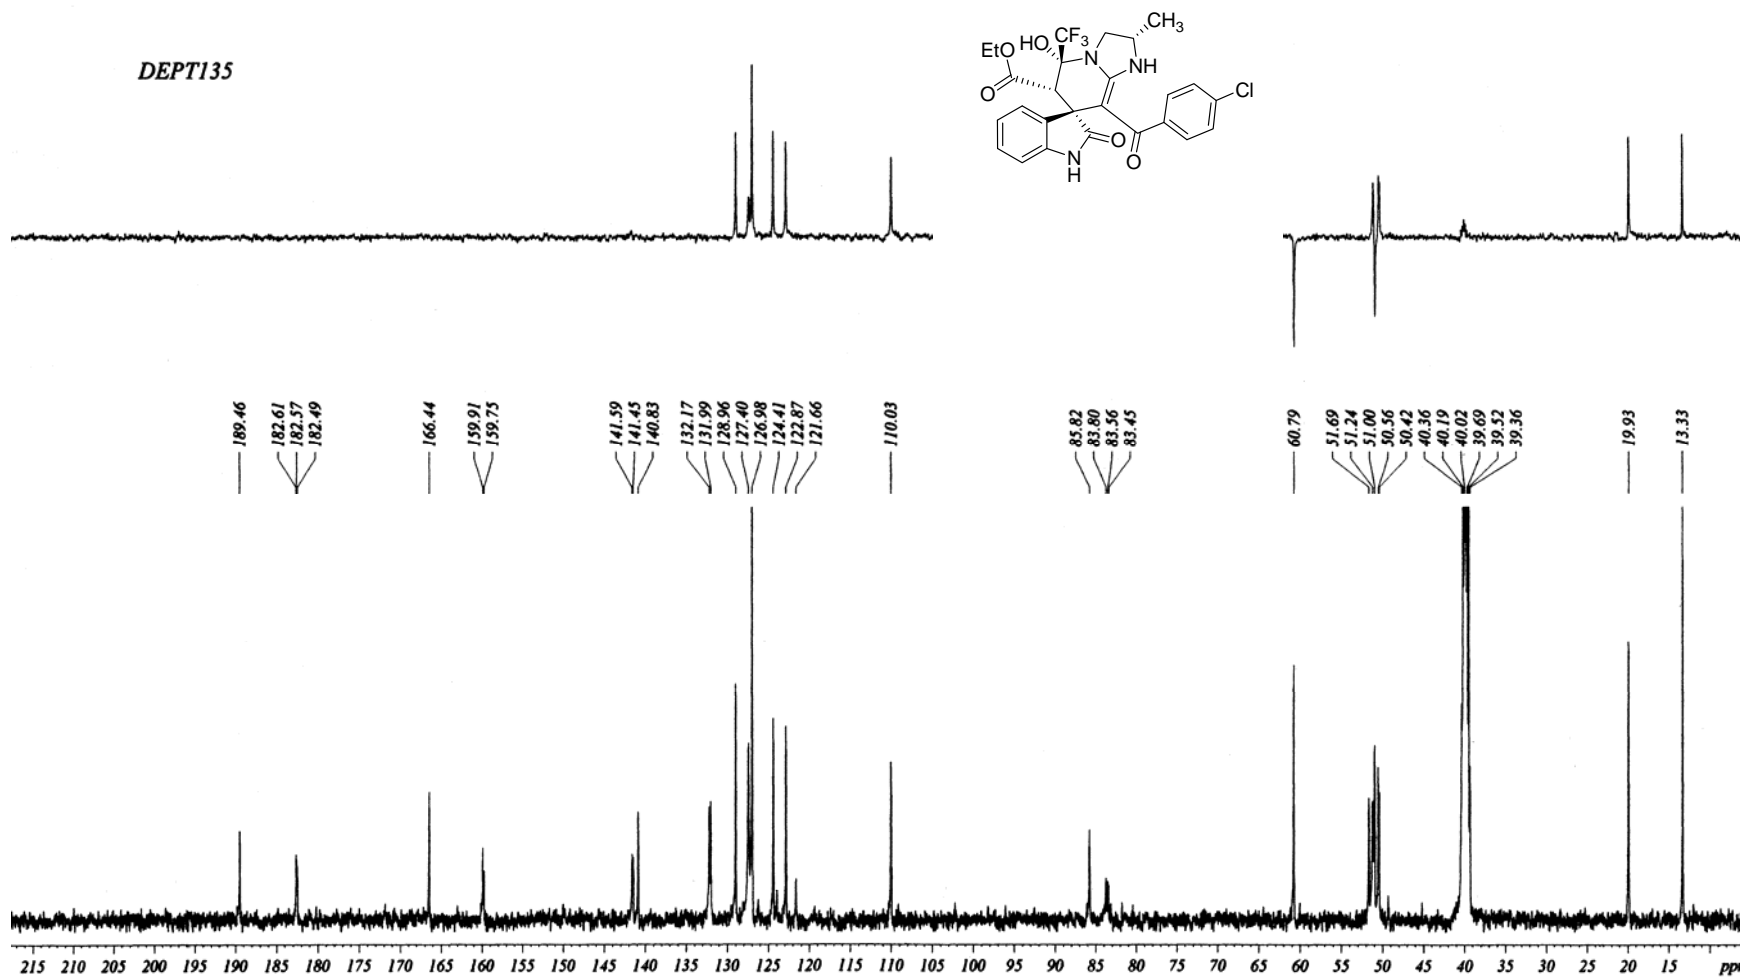

**Figure 34.** <sup>13</sup>C NMR (125 MHz, DMSO-*d*<sub>6</sub> + HClO<sub>4</sub>) spectra of compound **5o**

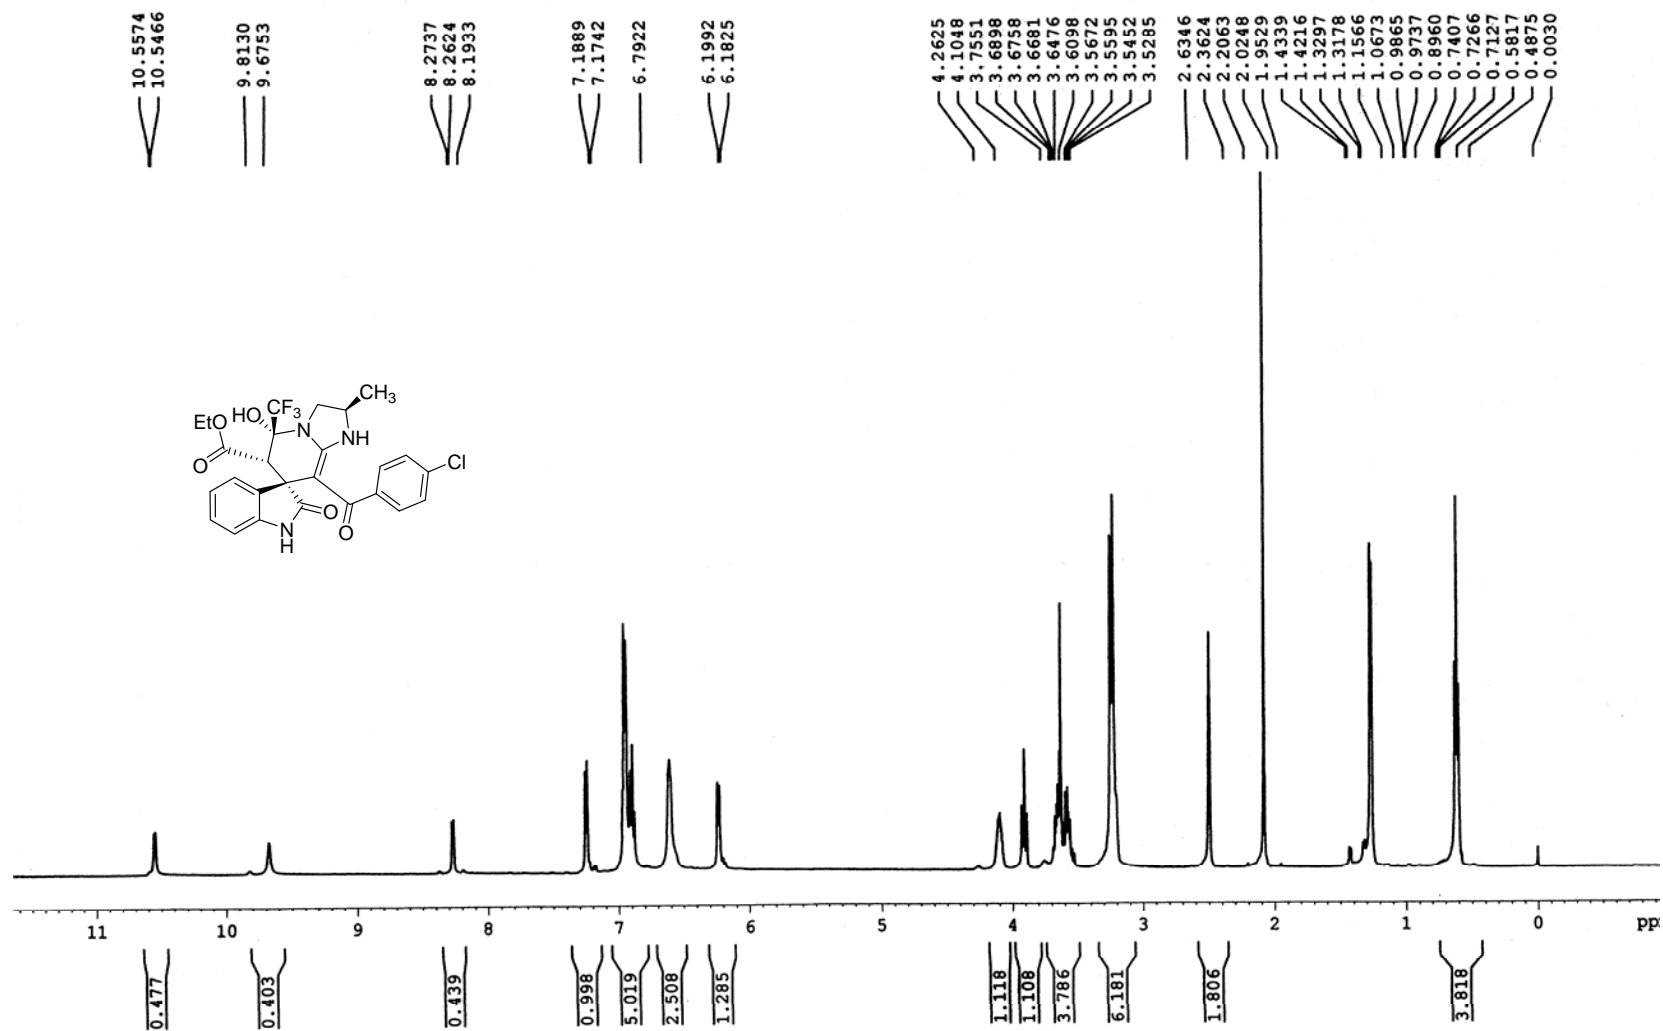

Figure 35. <sup>1</sup>H NMR (500 MHz, DMSO-d<sub>6</sub>) spectra of compound 50'

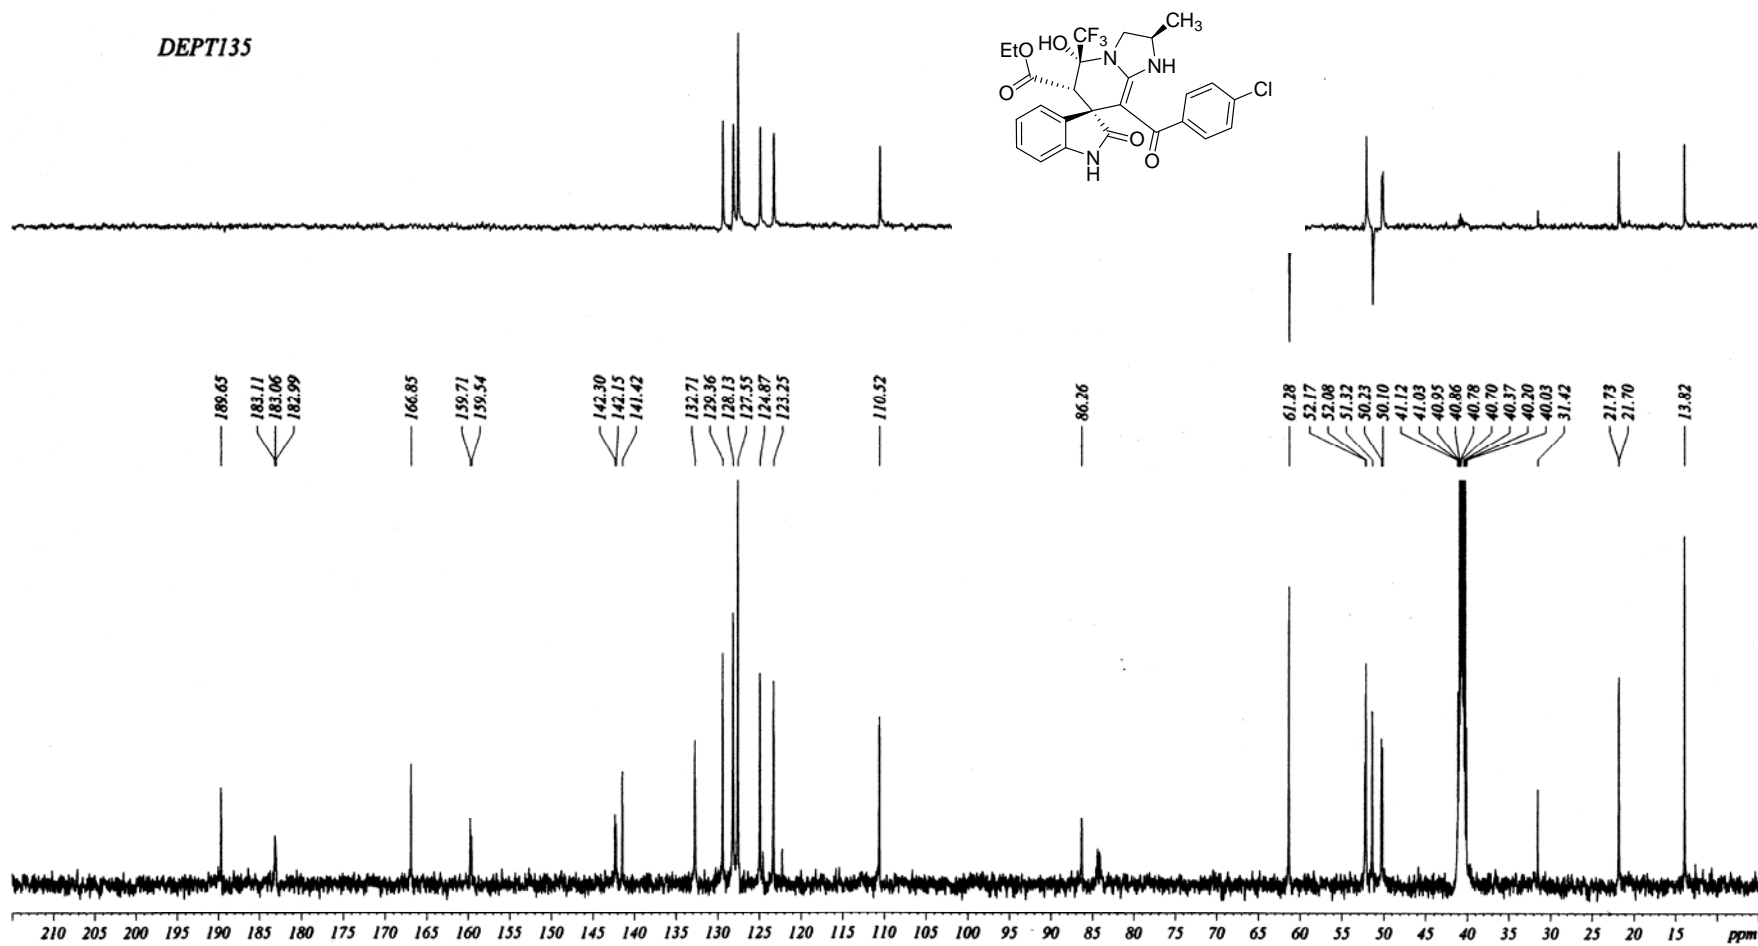

Figure 36.  $^{13}\text{C}$  NMR (125 MHz,  $\text{DMSO}-d_6$ ) spectra of compound 50'



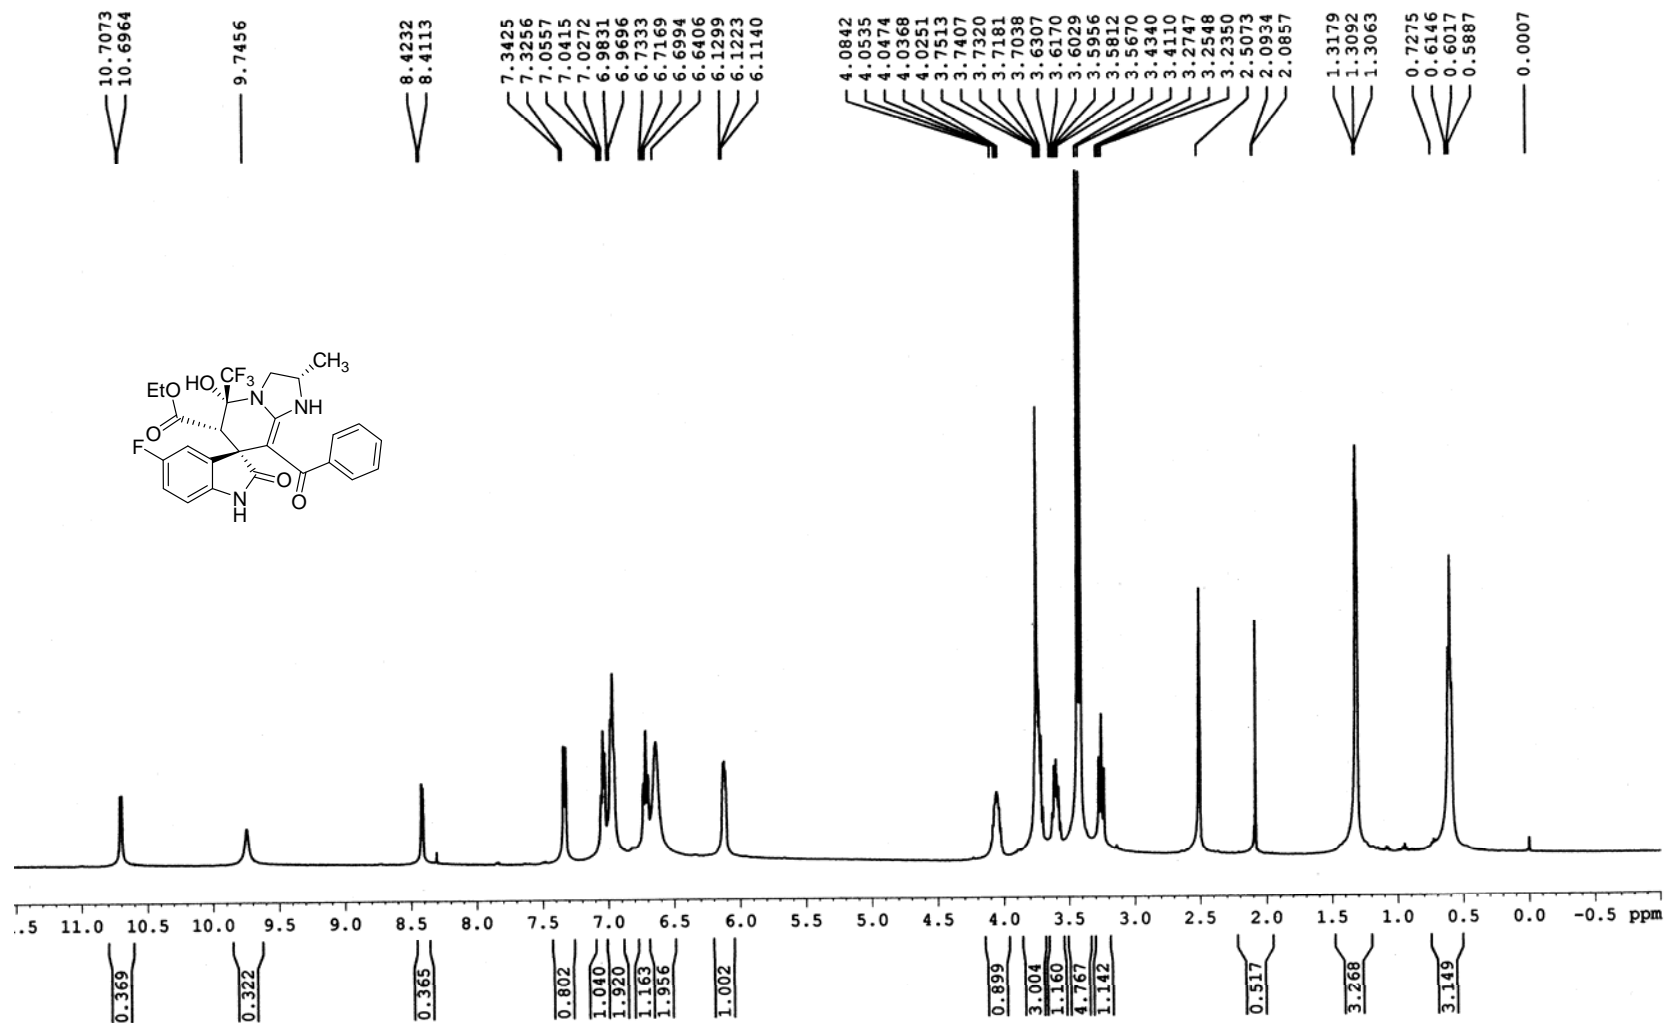

Figure 37. <sup>1</sup>H NMR (500 MHz, DMSO-*d*<sub>6</sub>) spectra of compound 5p

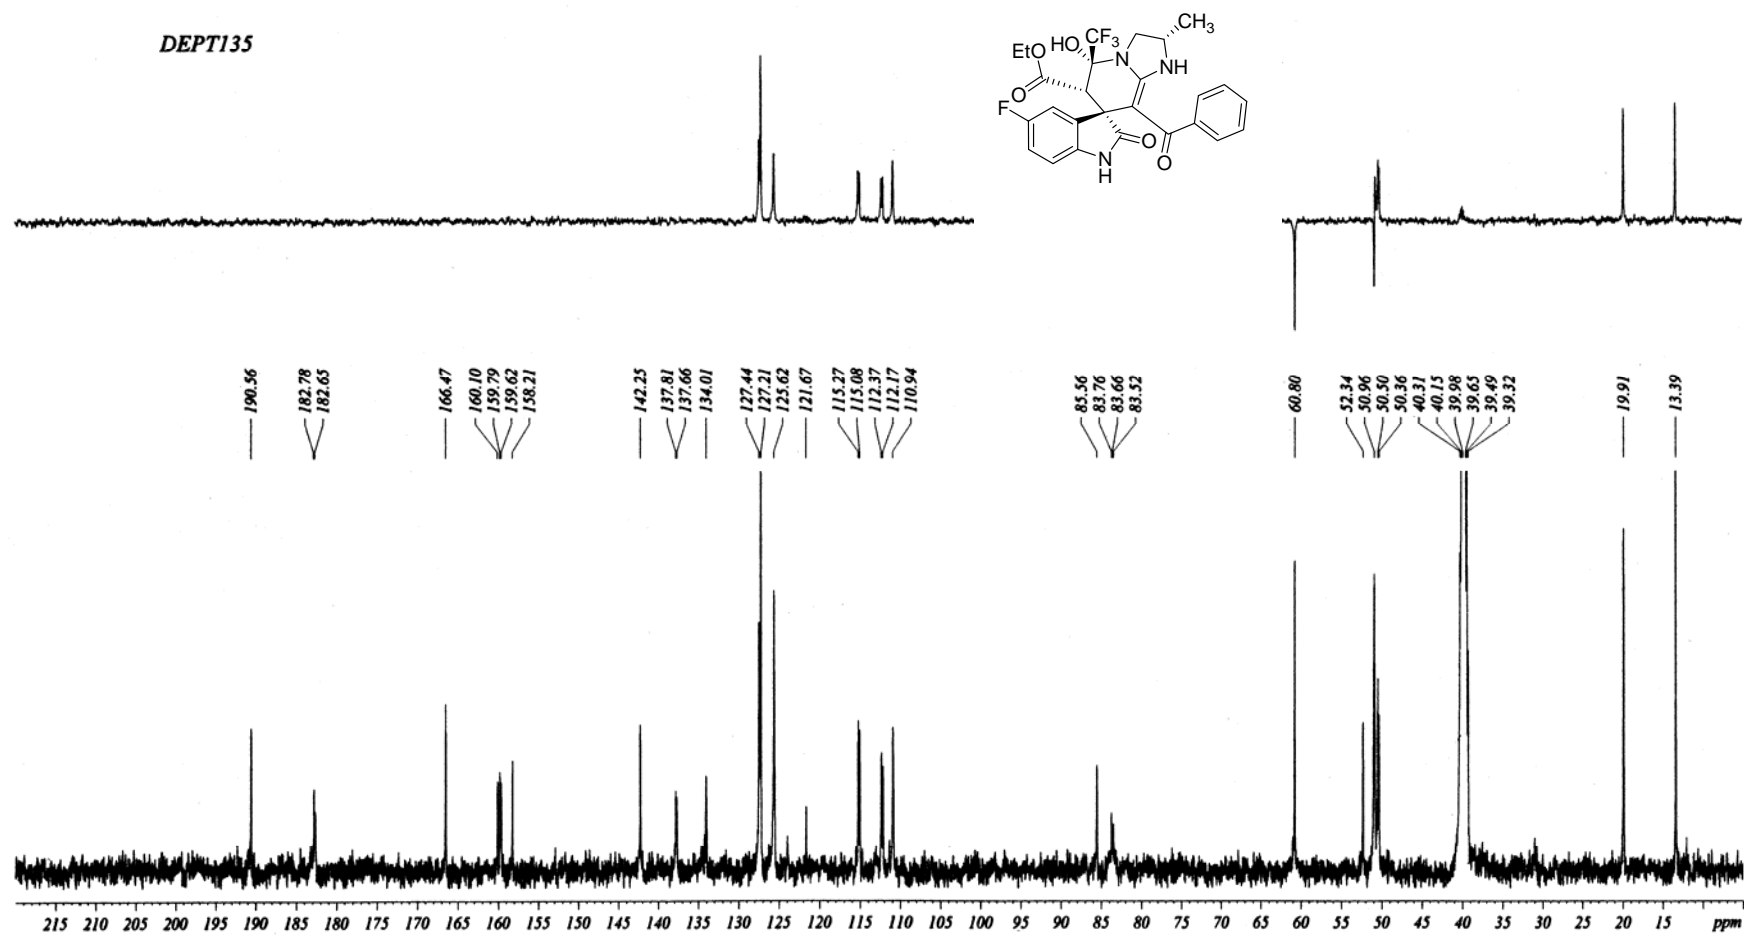

Figure 38. <sup>13</sup>C NMR (125 MHz, DMSO-*d*<sub>6</sub>) spectra of compound **5p**

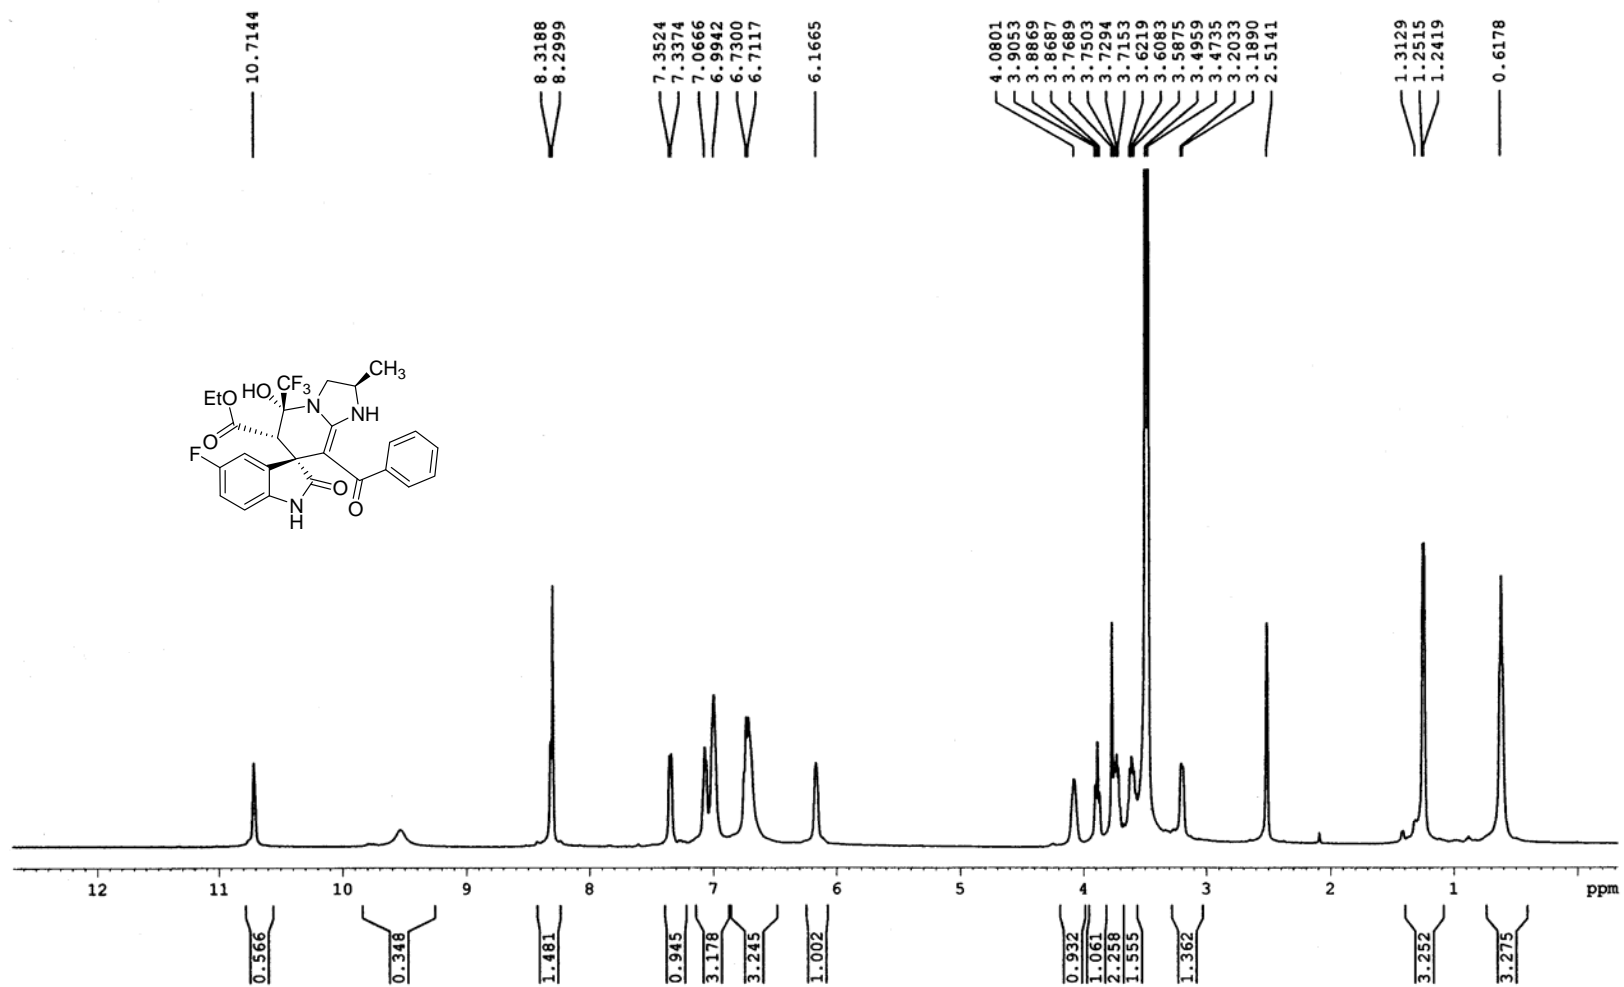

Figure 39. <sup>1</sup>H NMR (500 MHz, DMSO-d<sub>6</sub>) spectra of compound 5p'

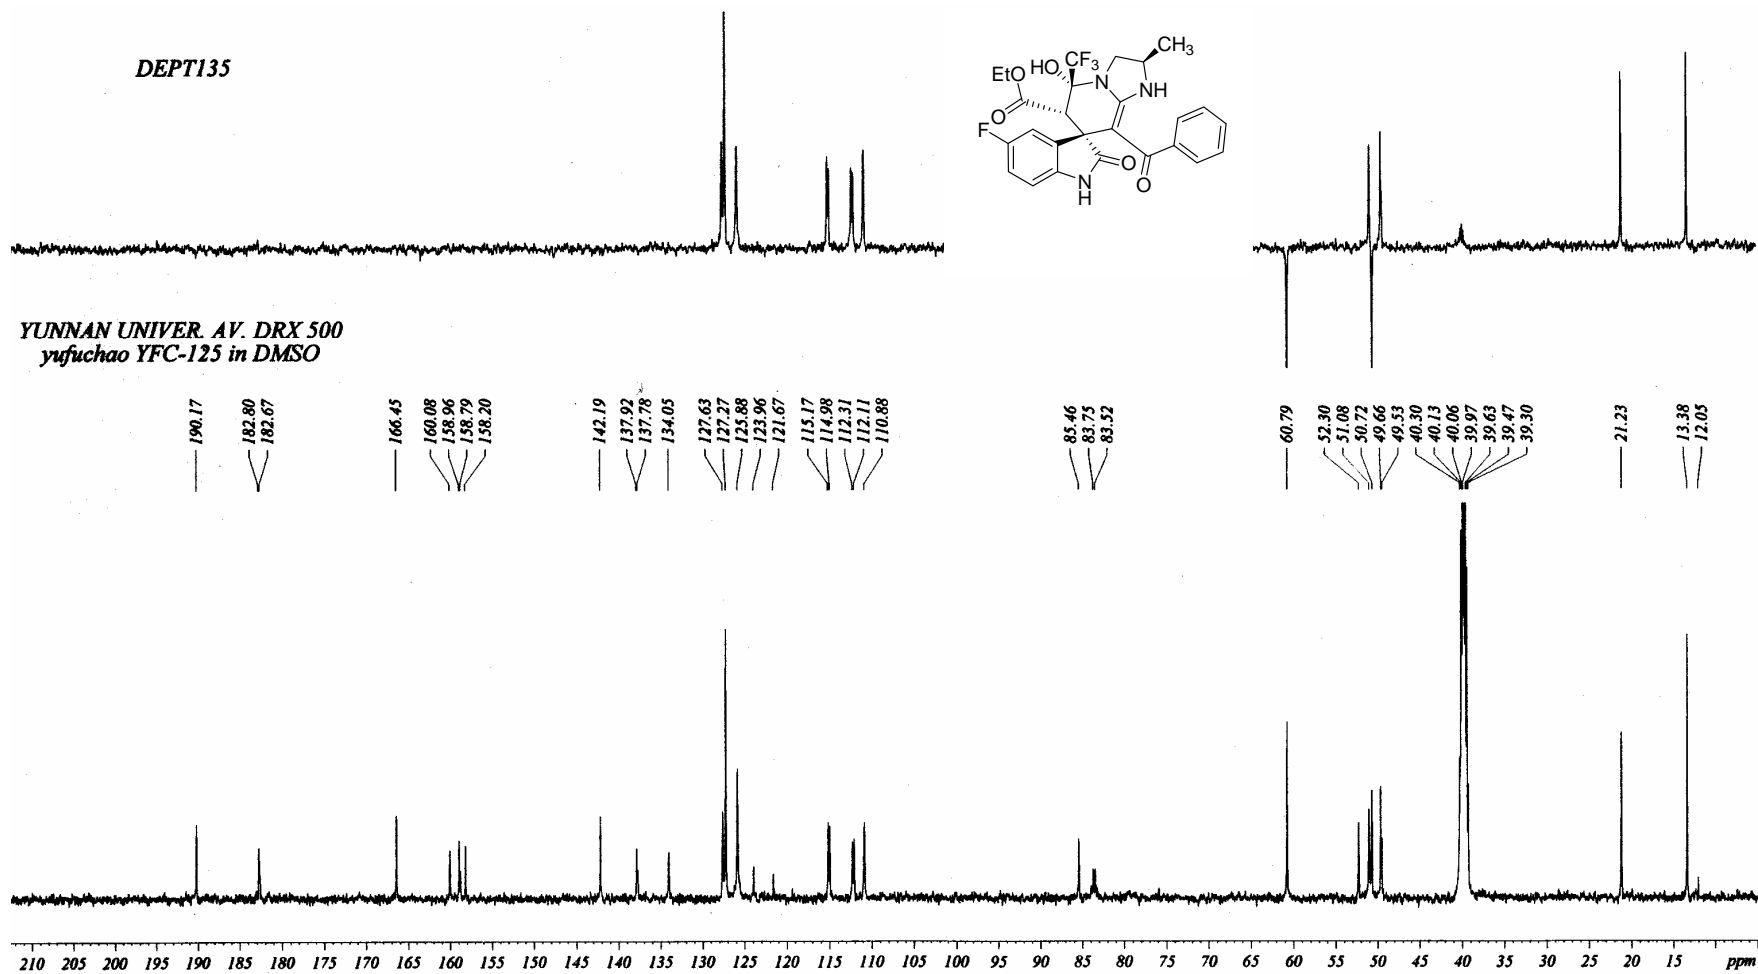

**Figure 40.** <sup>13</sup>C NMR (125 MHz, DMSO-*d*<sub>6</sub>) spectra of compound **5p'**

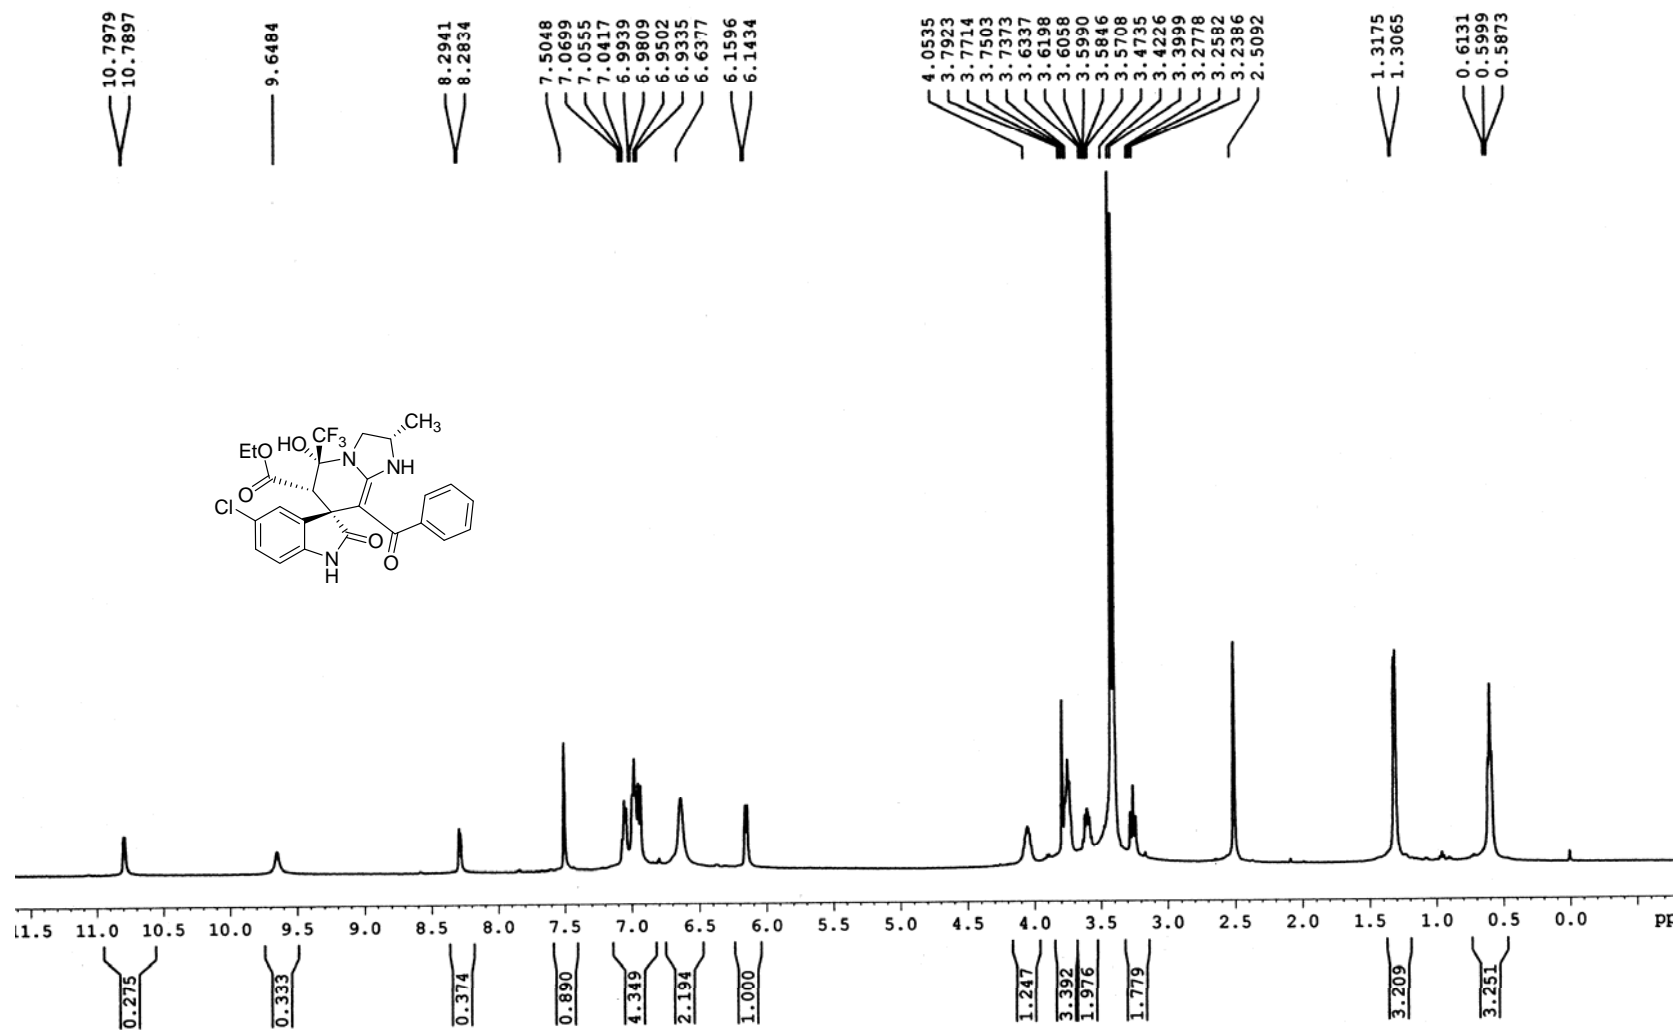

Figure 41.  $^1\text{H}$  NMR (500 MHz,  $\text{DMSO-}d_6$ ) spectra of compound 5q

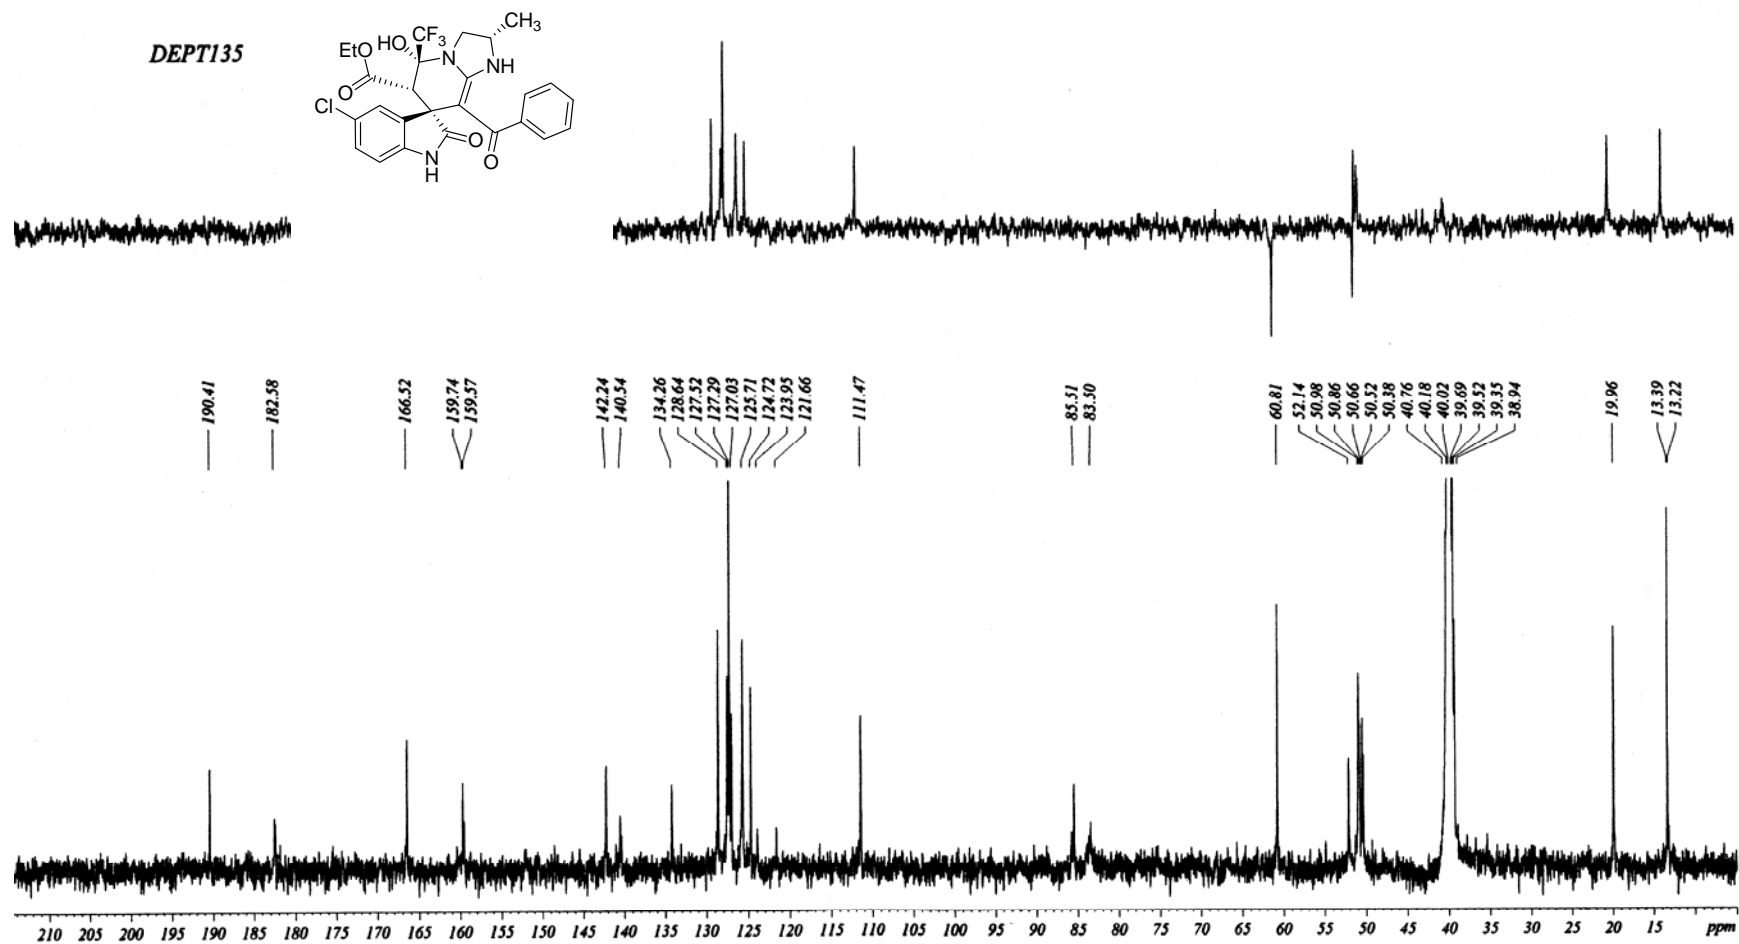

**Figure 42.**  $^{13}\text{C}$  NMR (125 MHz,  $\text{DMSO-}d_6$ ) spectra of compound **5q**

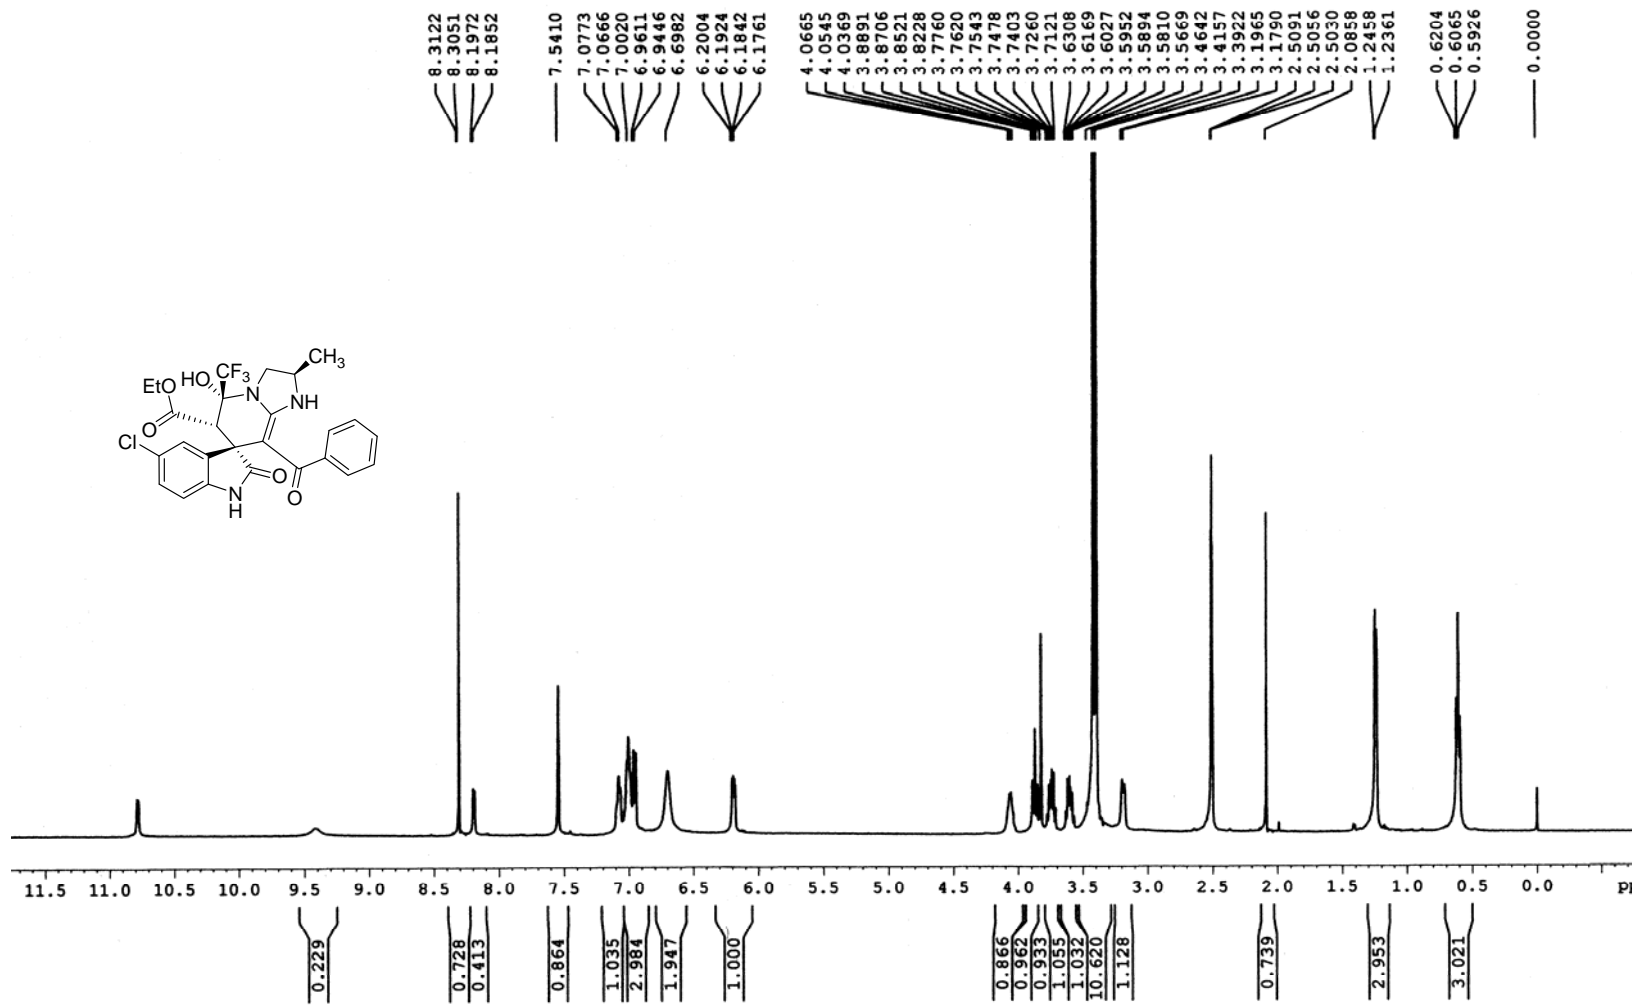

Figure 43. <sup>1</sup>H NMR (500 MHz, DMSO-*d*<sub>6</sub>) spectra of compound 5q'

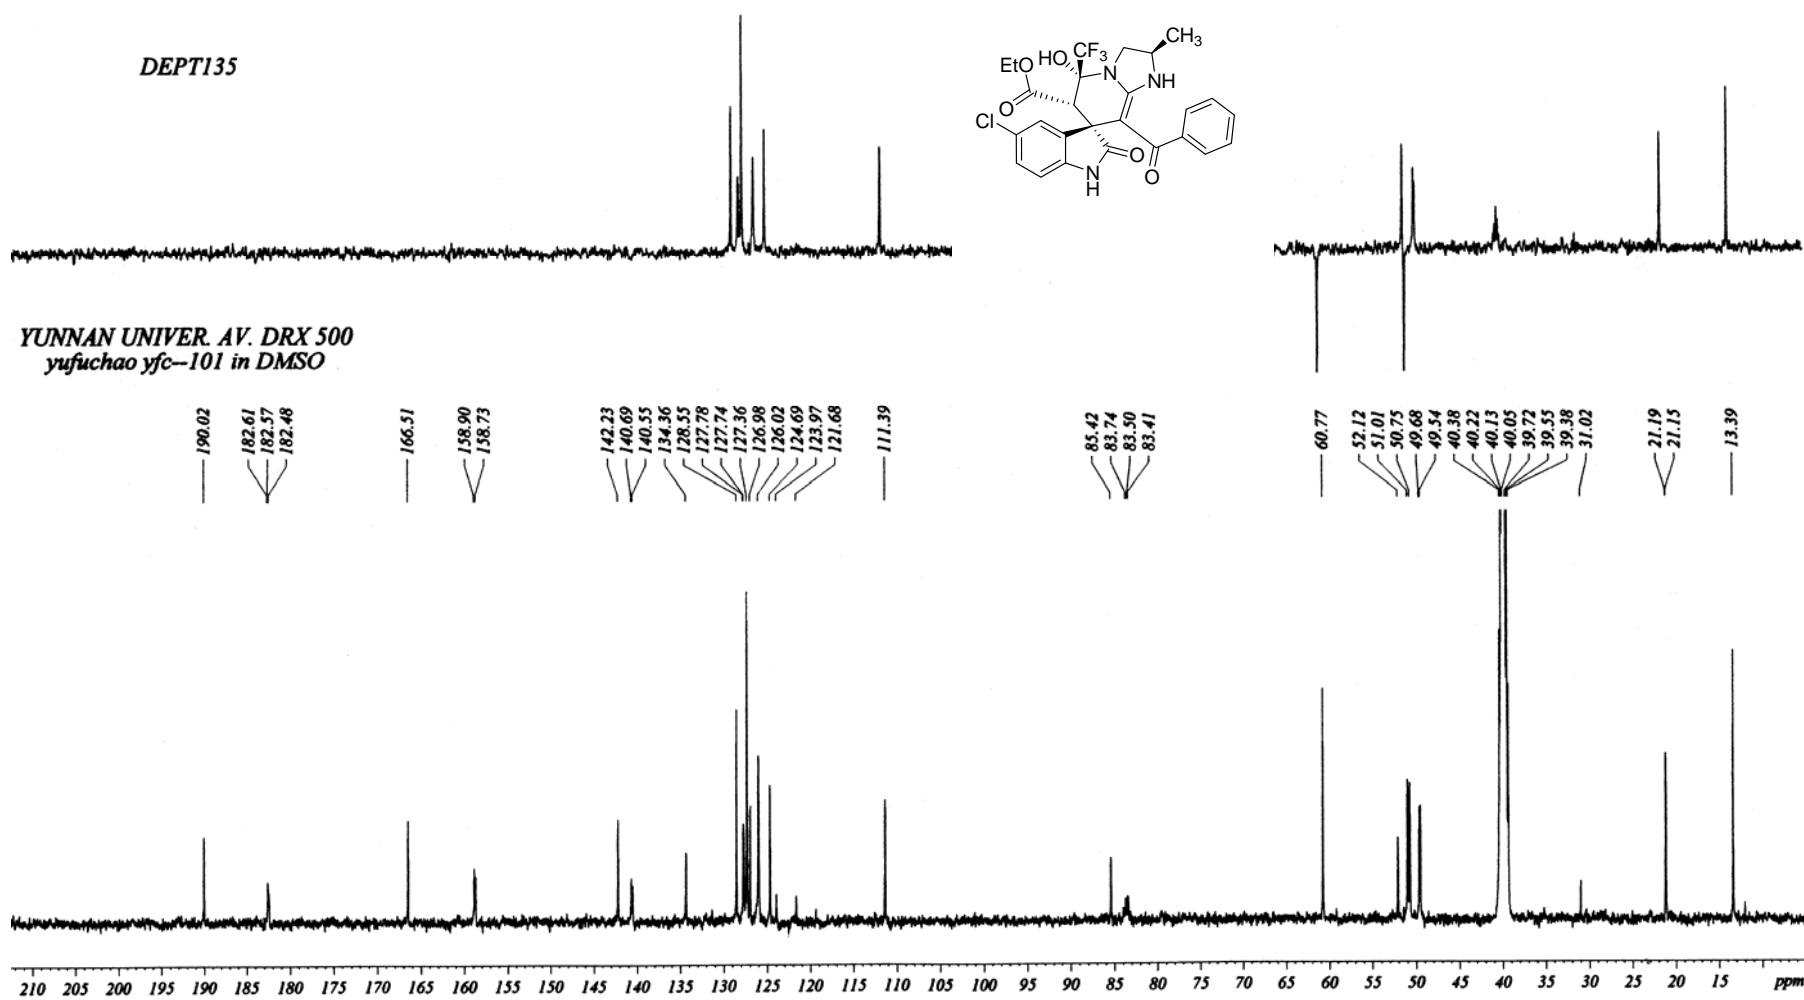

Figure 44.  $^{13}\text{C}$  NMR (125 MHz,  $\text{DMSO-}d_6$ ) spectra of compound 5q'



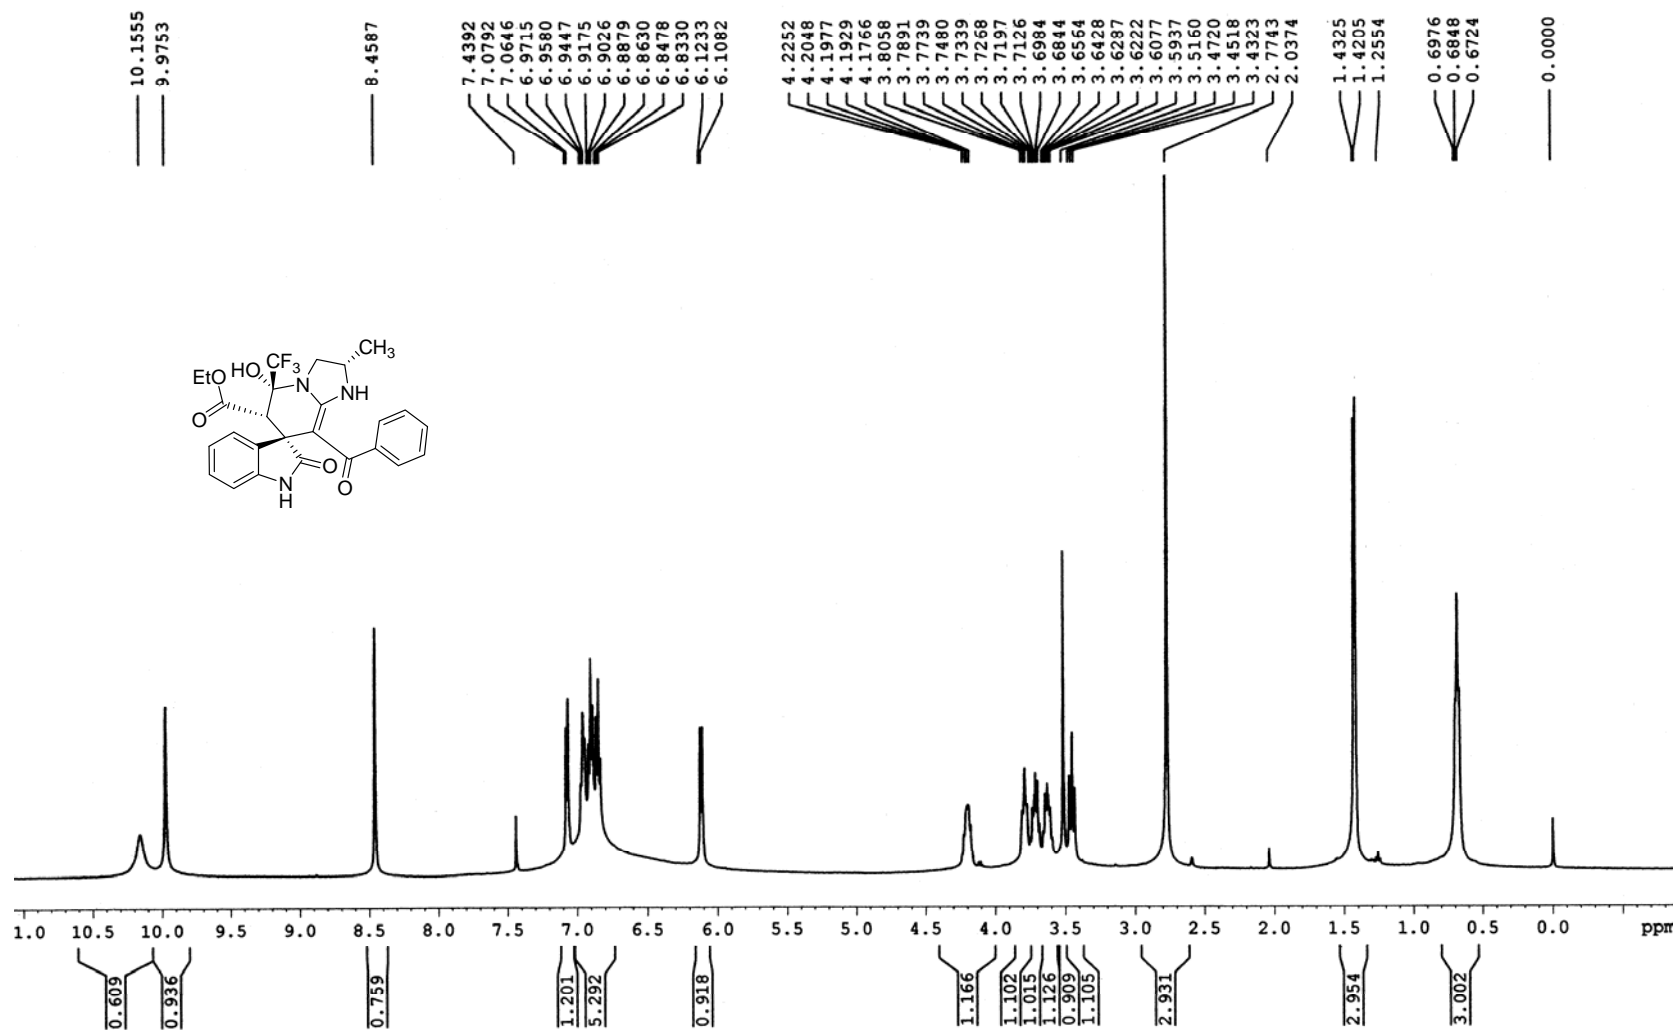

**Figure 45.** <sup>1</sup>H NMR (500 MHz, CDCl<sub>3</sub> + DMSO-*d*<sub>6</sub>) spectra of compound **5r**

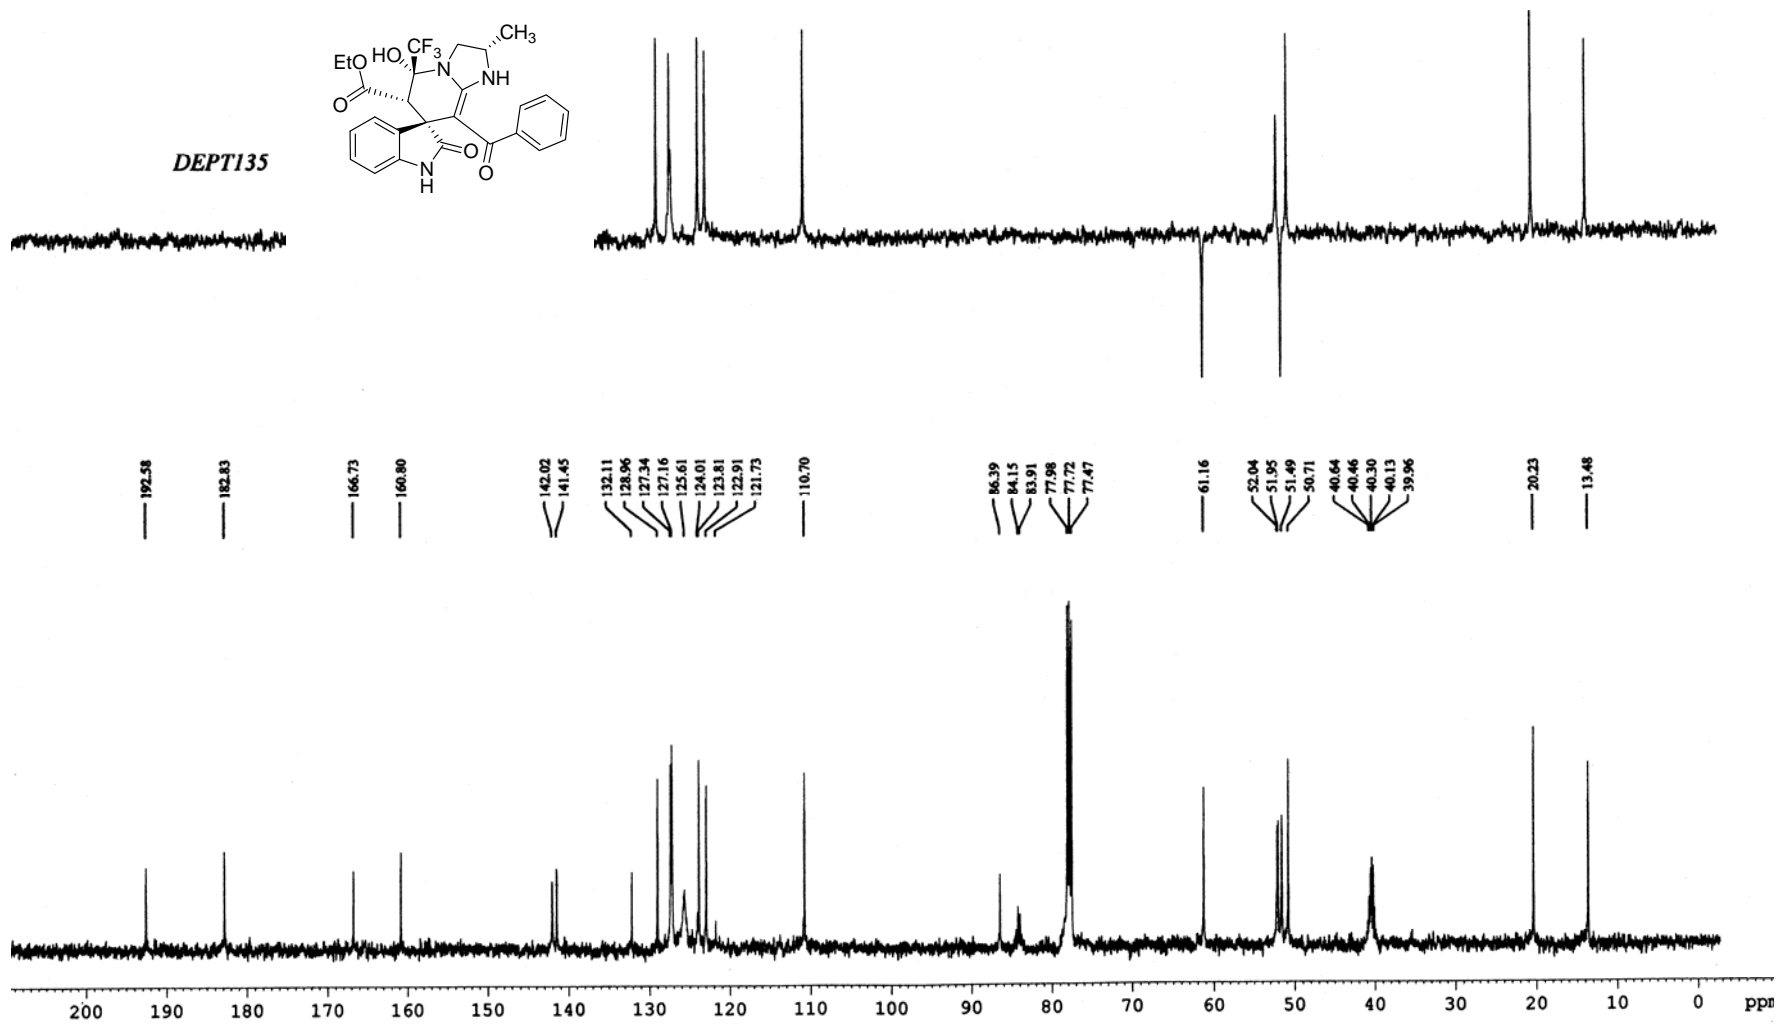

Figure 46.  $^{13}\text{C}$  NMR (125 MHz,  $\text{CDCl}_3 + \text{DMSO-}d_6$ ) spectra of compound **5r**

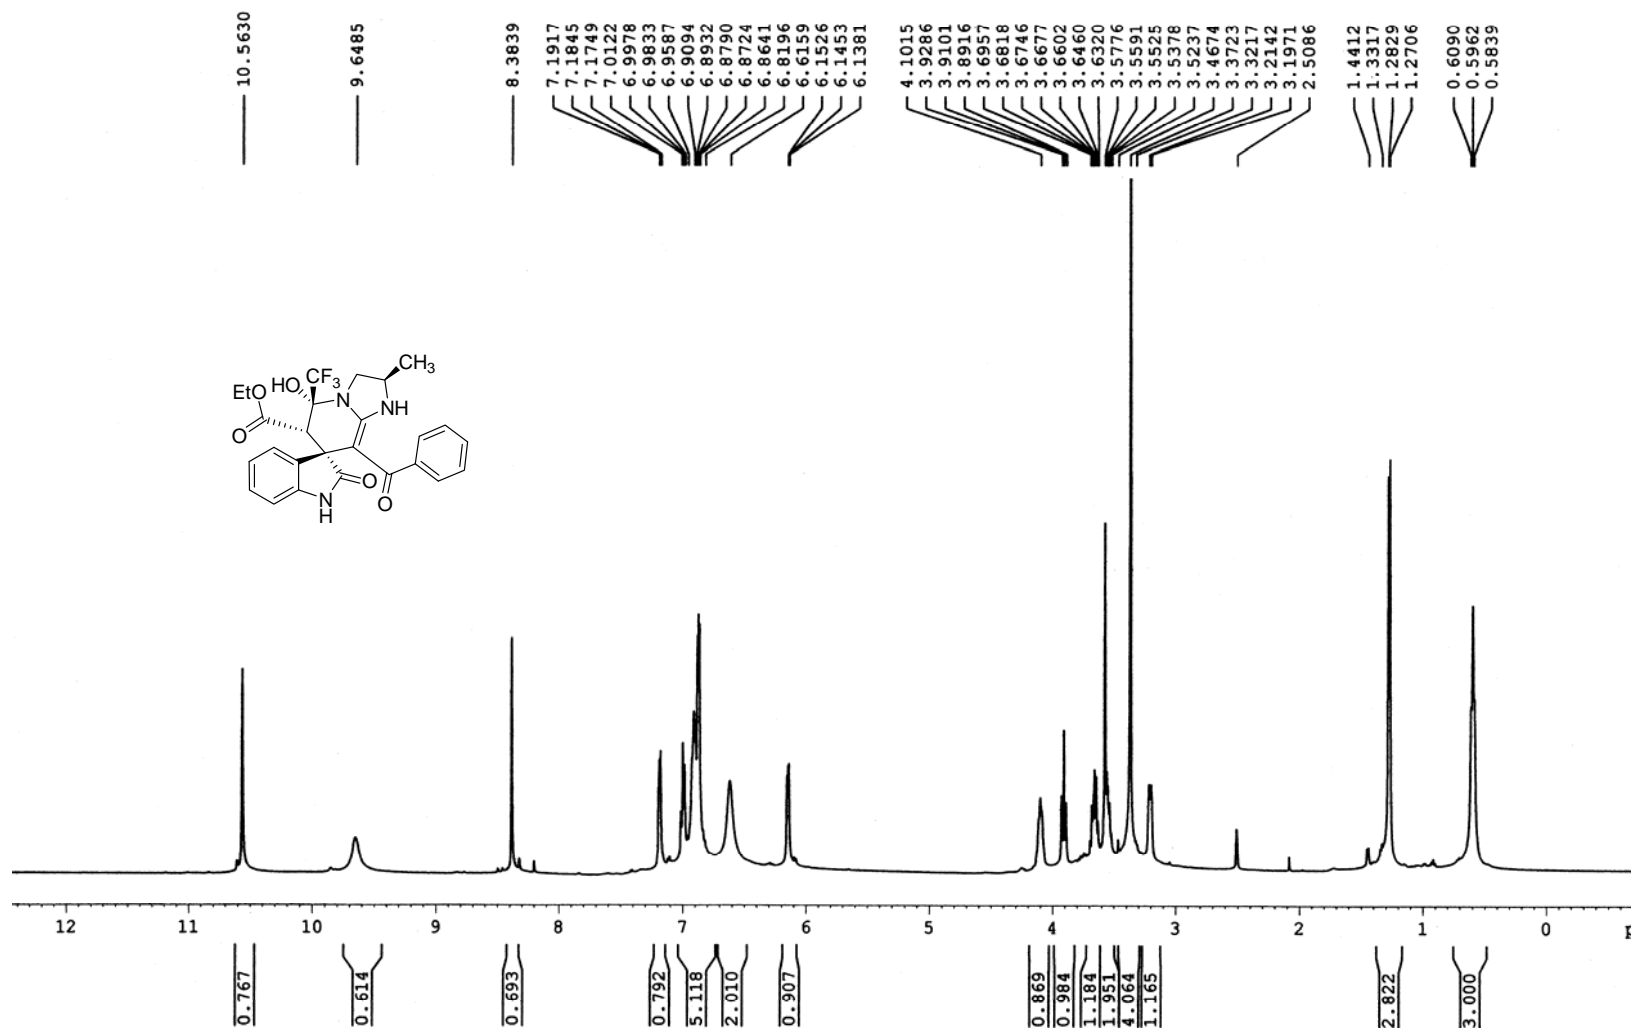

**Figure 47.** <sup>1</sup>H NMR (500 MHz, CDCl<sub>3</sub> + DMSO-*d*<sub>6</sub>) spectra of compound **5r'**

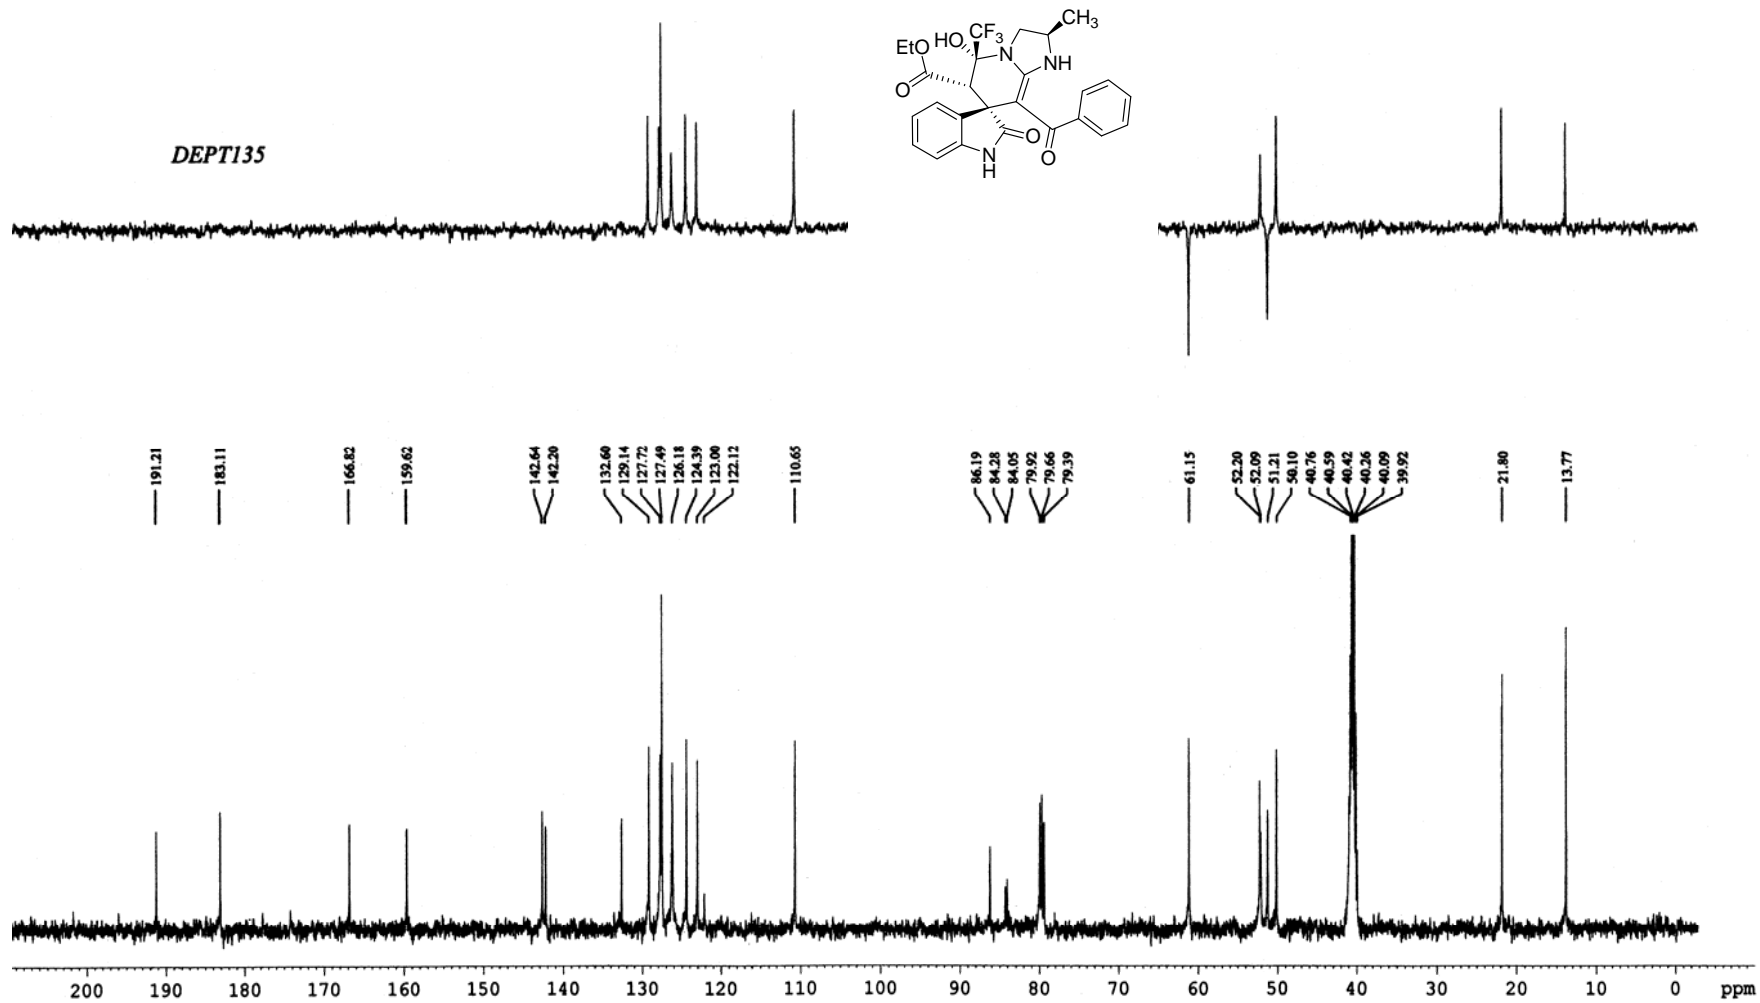

Figure 48. <sup>13</sup>C NMR (125 MHz, CDCl<sub>3</sub> + DMSO-*d*<sub>6</sub>) spectra of compound 5r'

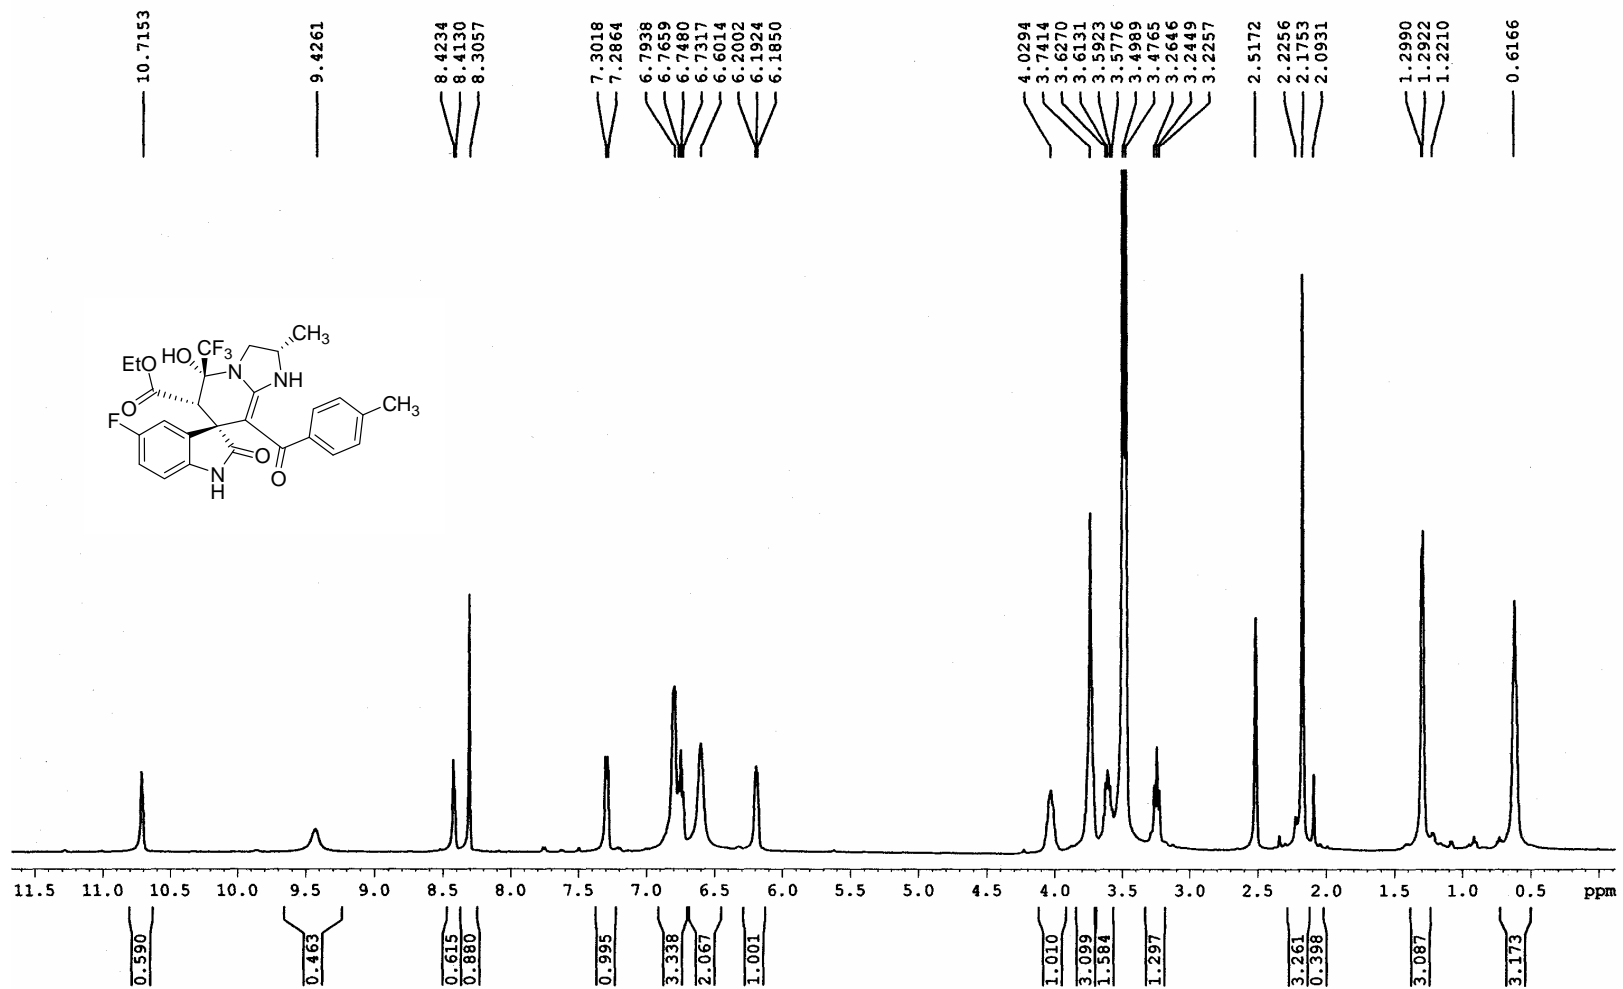

Figure 49. <sup>1</sup>H NMR (500 MHz, DMSO-*d*<sub>6</sub>) spectra of compound 5s

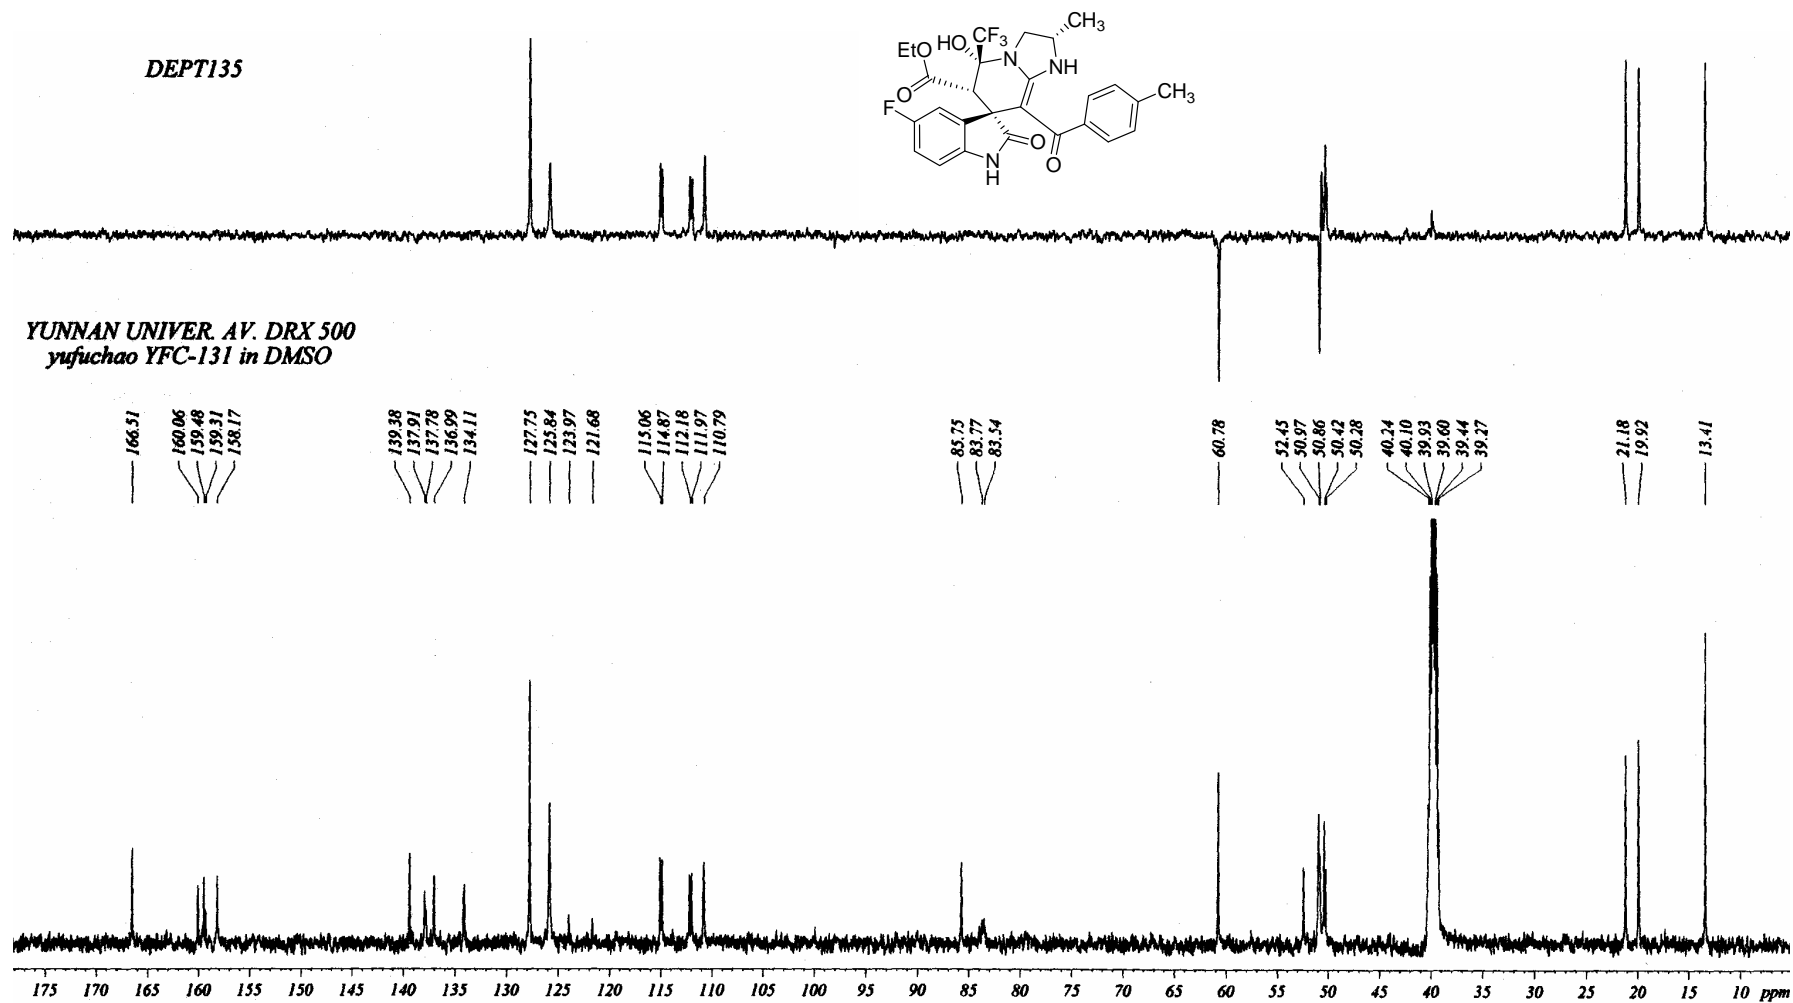

Figure 50.  $^{13}\text{C}$  NMR (125 MHz,  $\text{DMSO-}d_6$ ) spectra of compound 5s

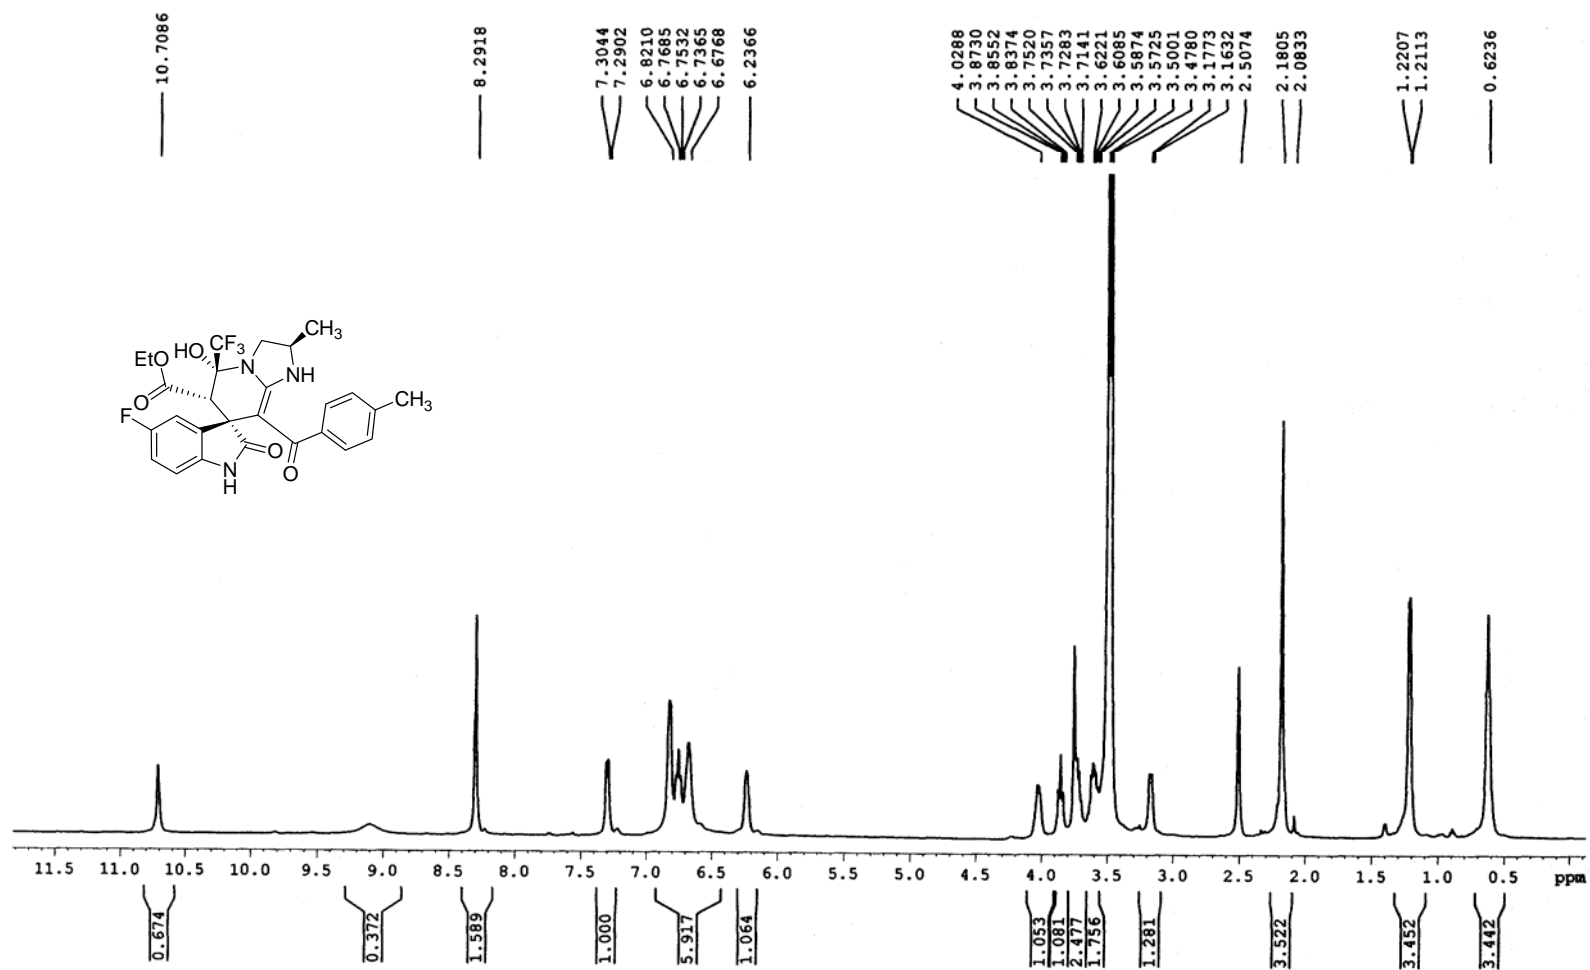

Figure 51. <sup>1</sup>H NMR (500 MHz, DMSO-*d*<sub>6</sub>) spectra of compound 5s'

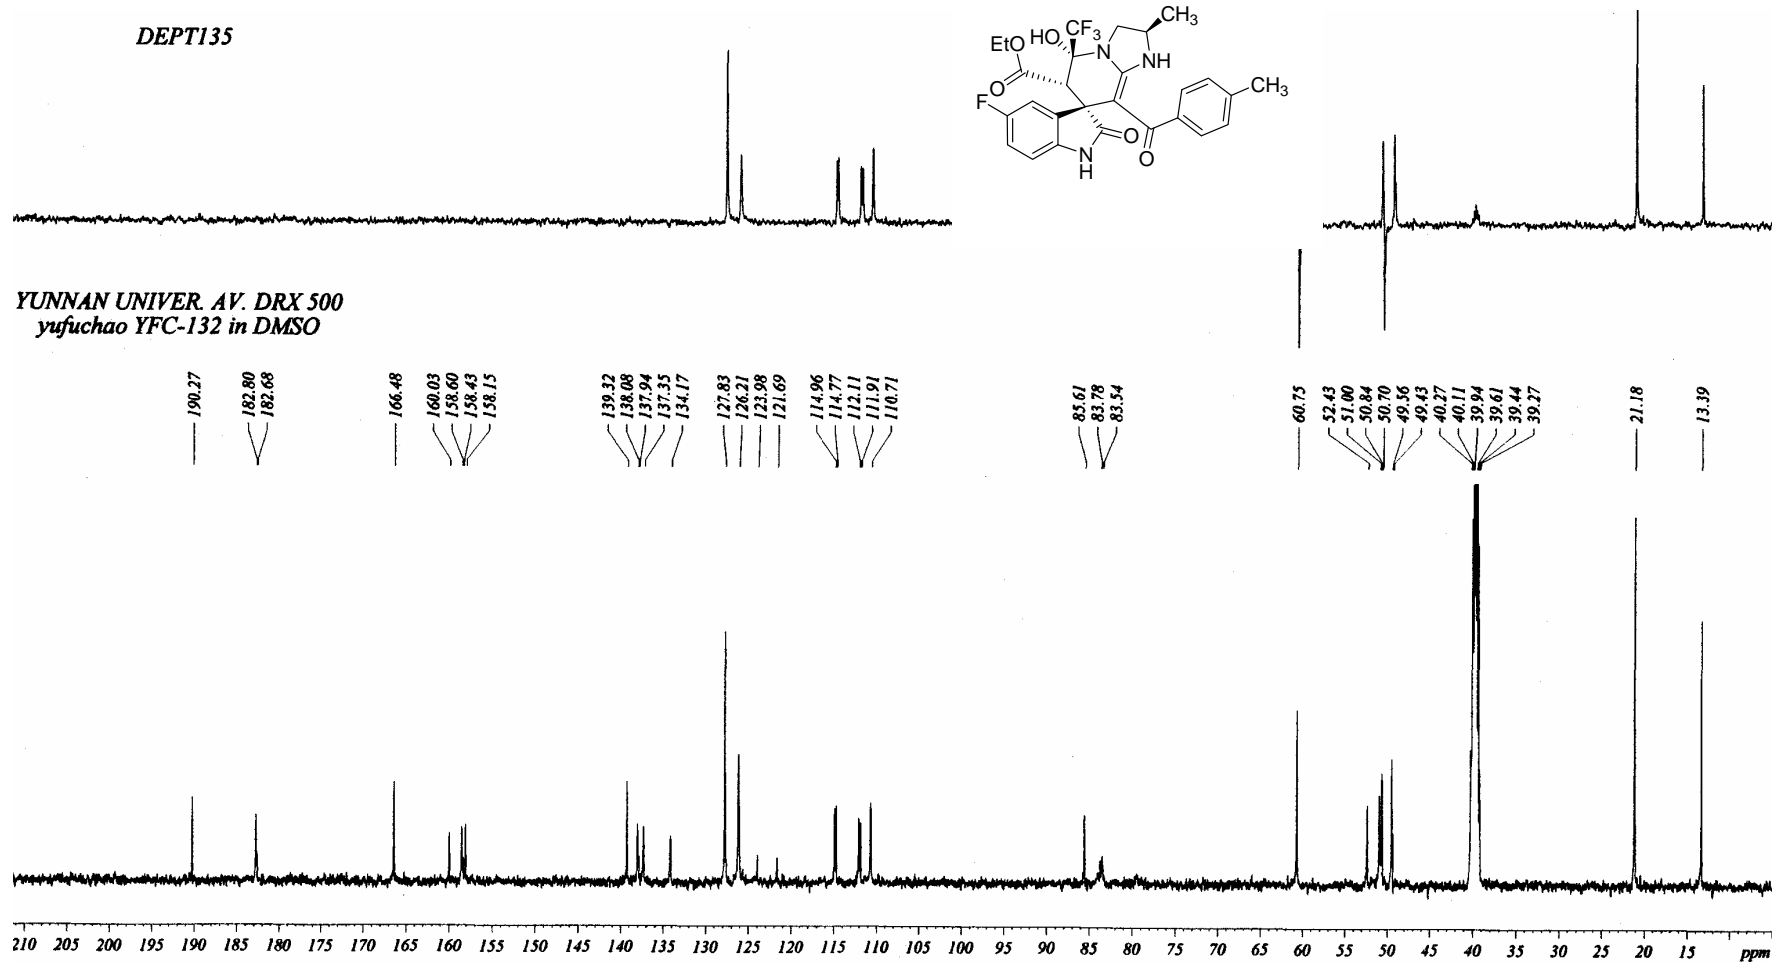

Figure 52.  $^{13}\text{C}$  NMR (125 MHz,  $\text{DMSO-}d_6$ ) spectra of compound 5s'



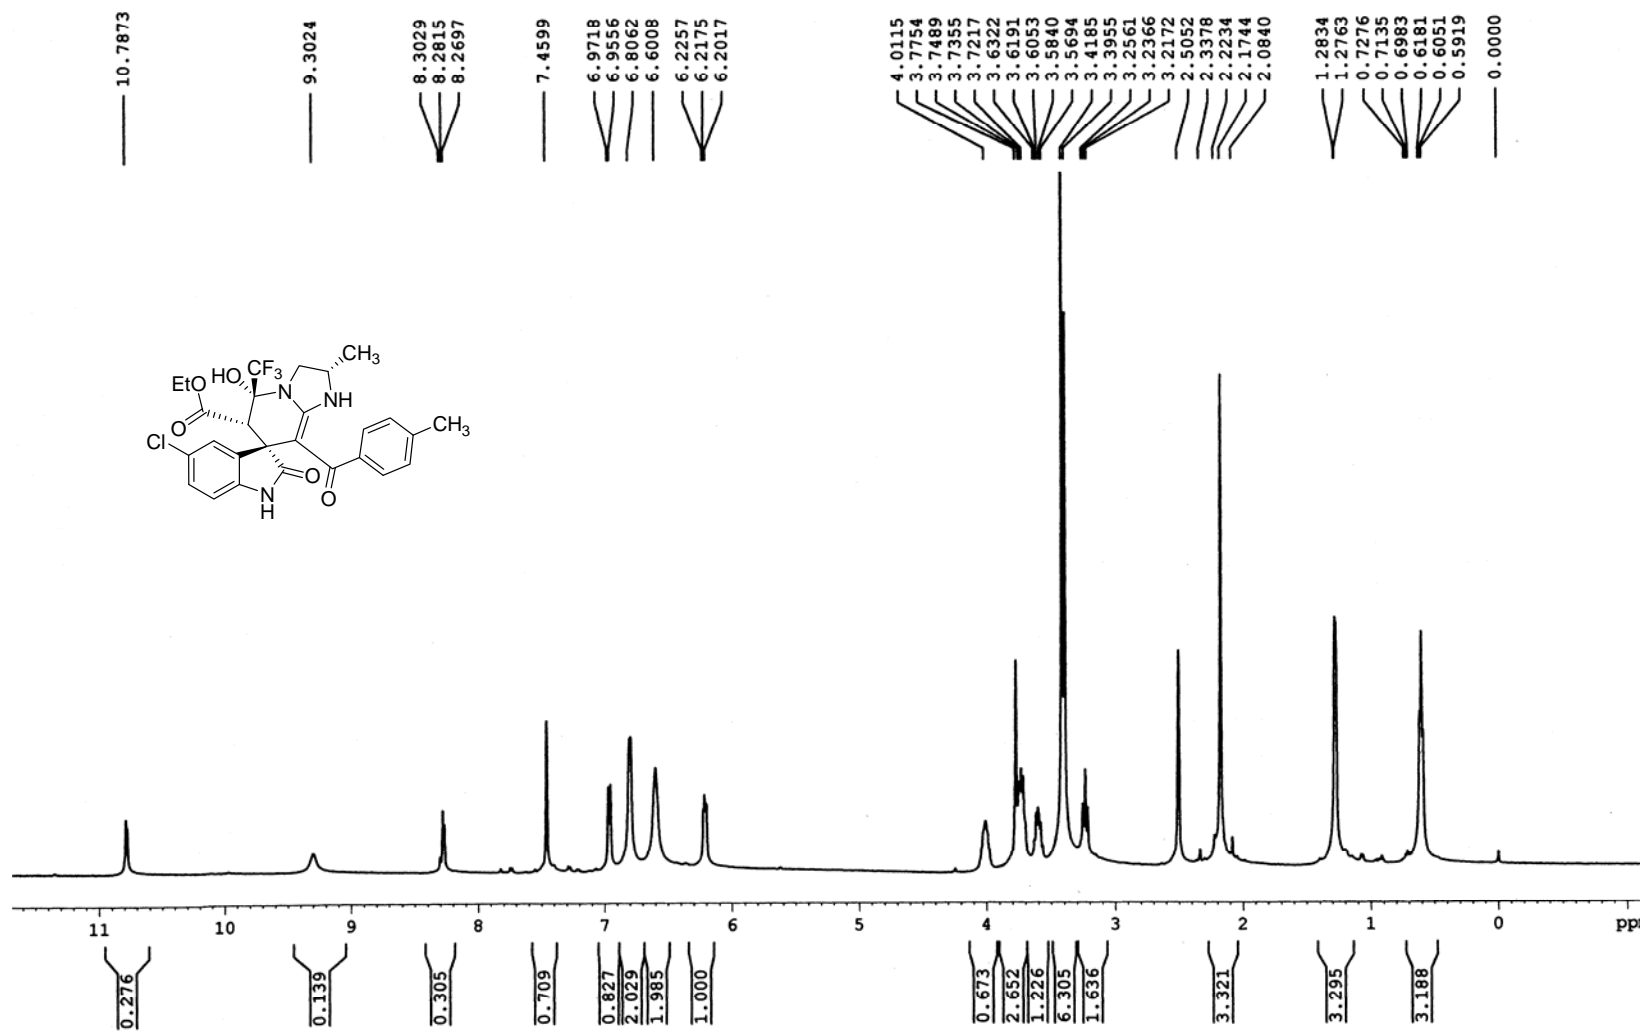

Figure 53. <sup>1</sup>H NMR (500 MHz, DMSO-*d*<sub>6</sub>) spectra of compound 5t

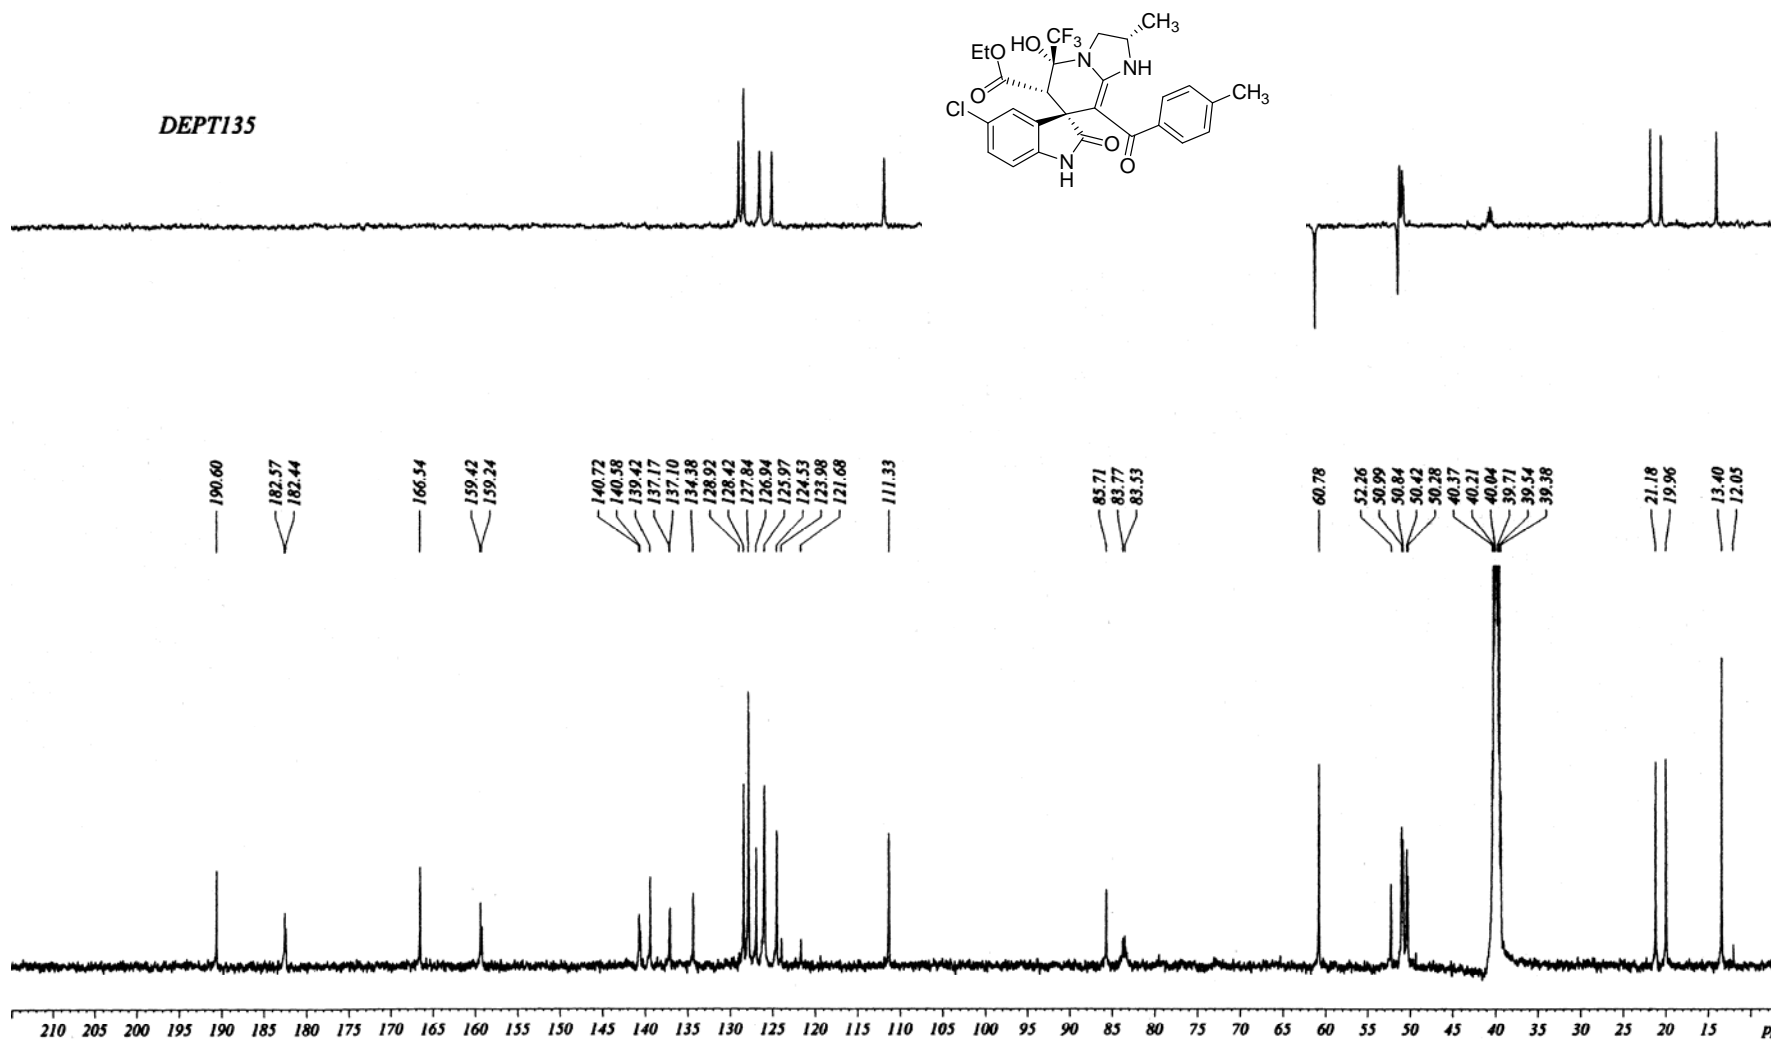

Figure 54.  $^{13}\text{C}$  NMR (125 MHz, DMSO- $d_6$ ) spectra of compound 5t

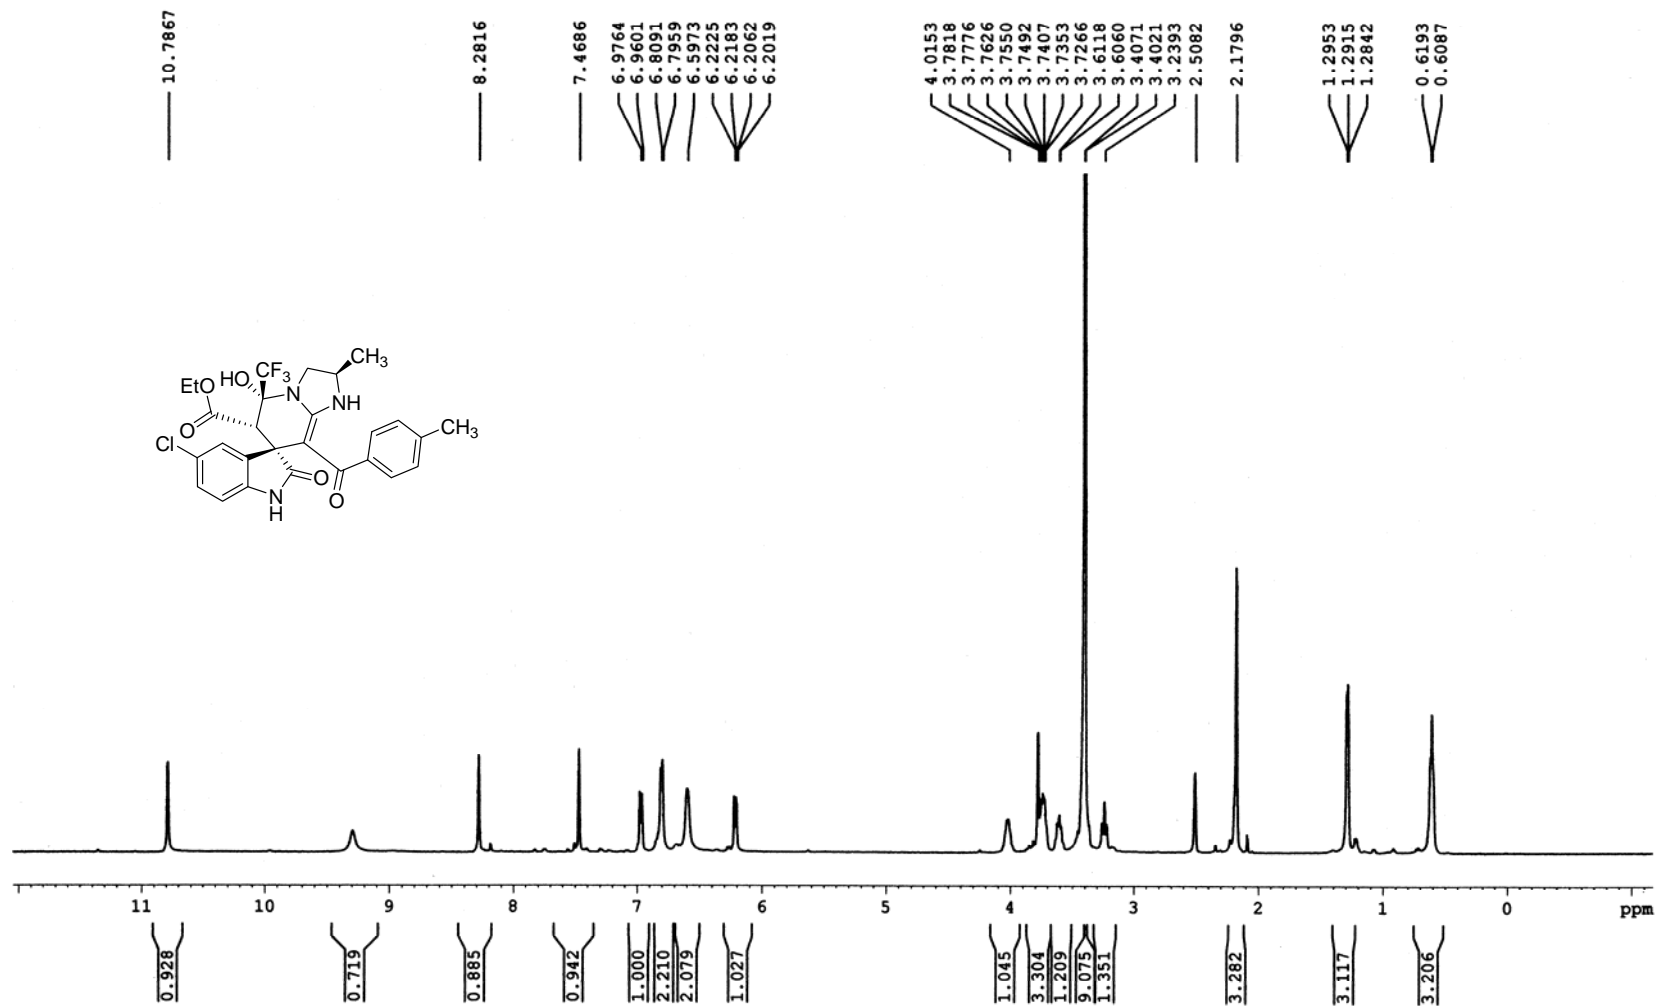

**Figure 55.** <sup>1</sup>H NMR (500 MHz, DMSO-*d*<sub>6</sub>) spectra of compound **5t'**

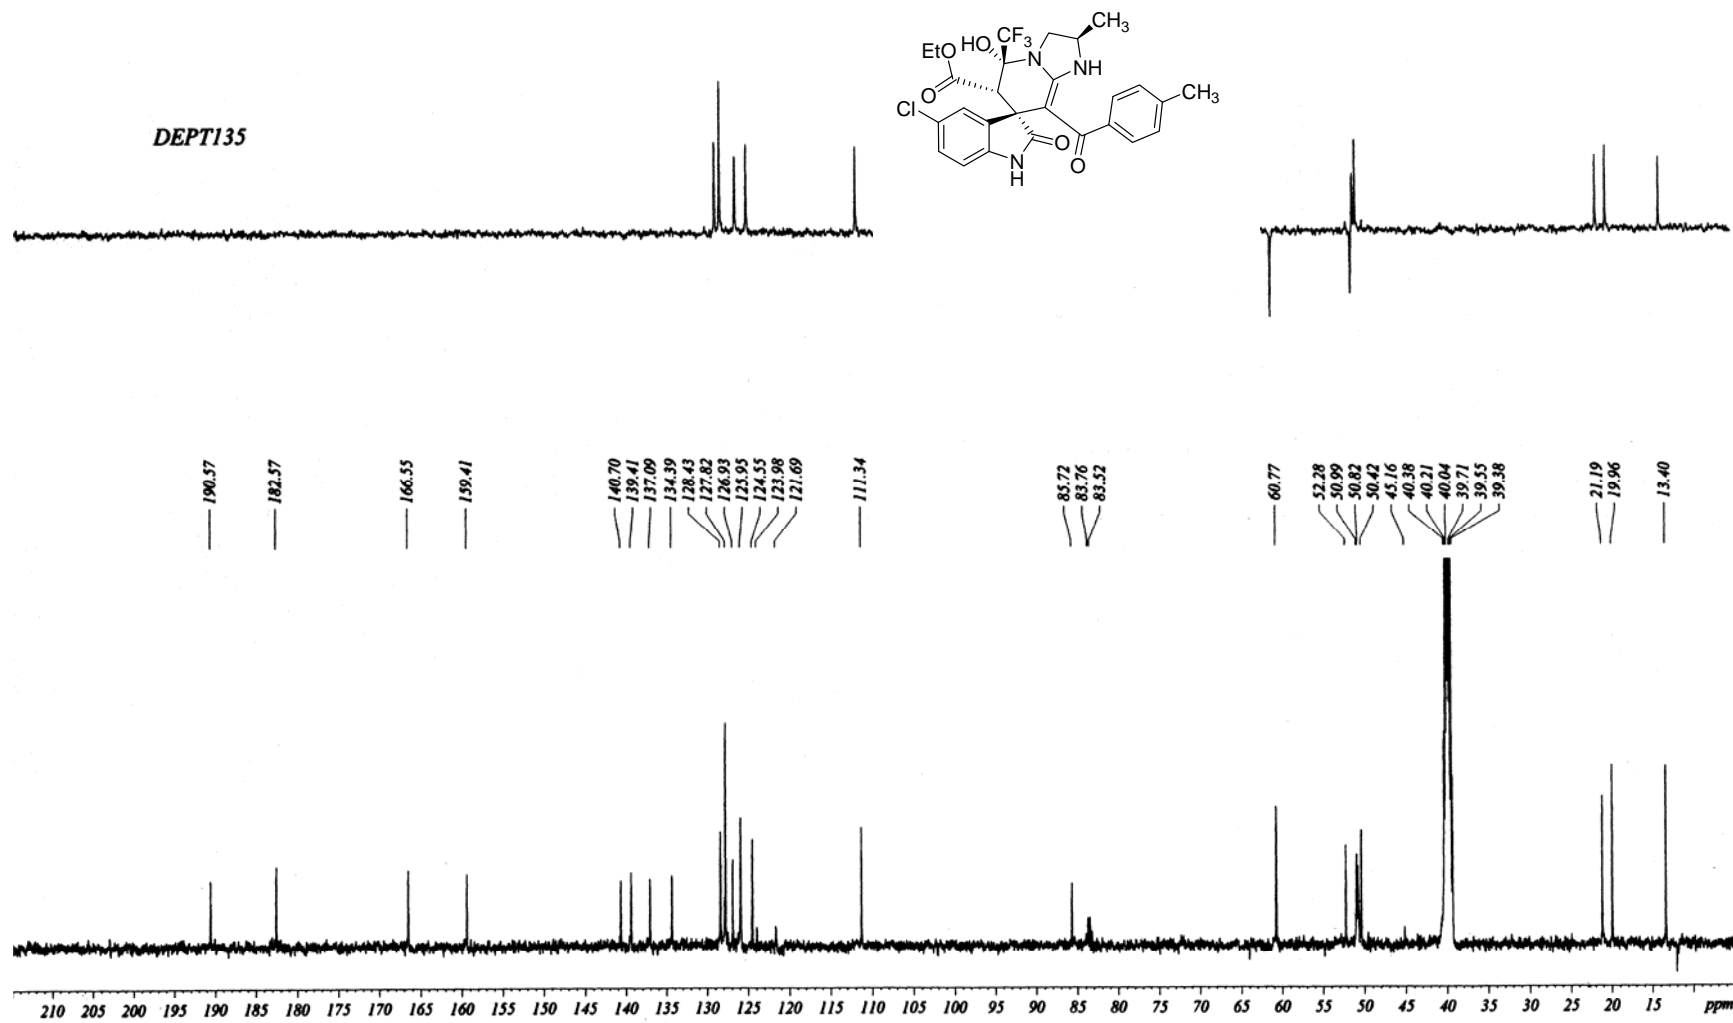

Figure 56. <sup>13</sup>C NMR (125 MHz, DMSO-*d*<sub>6</sub>) spectra of compound 5t'

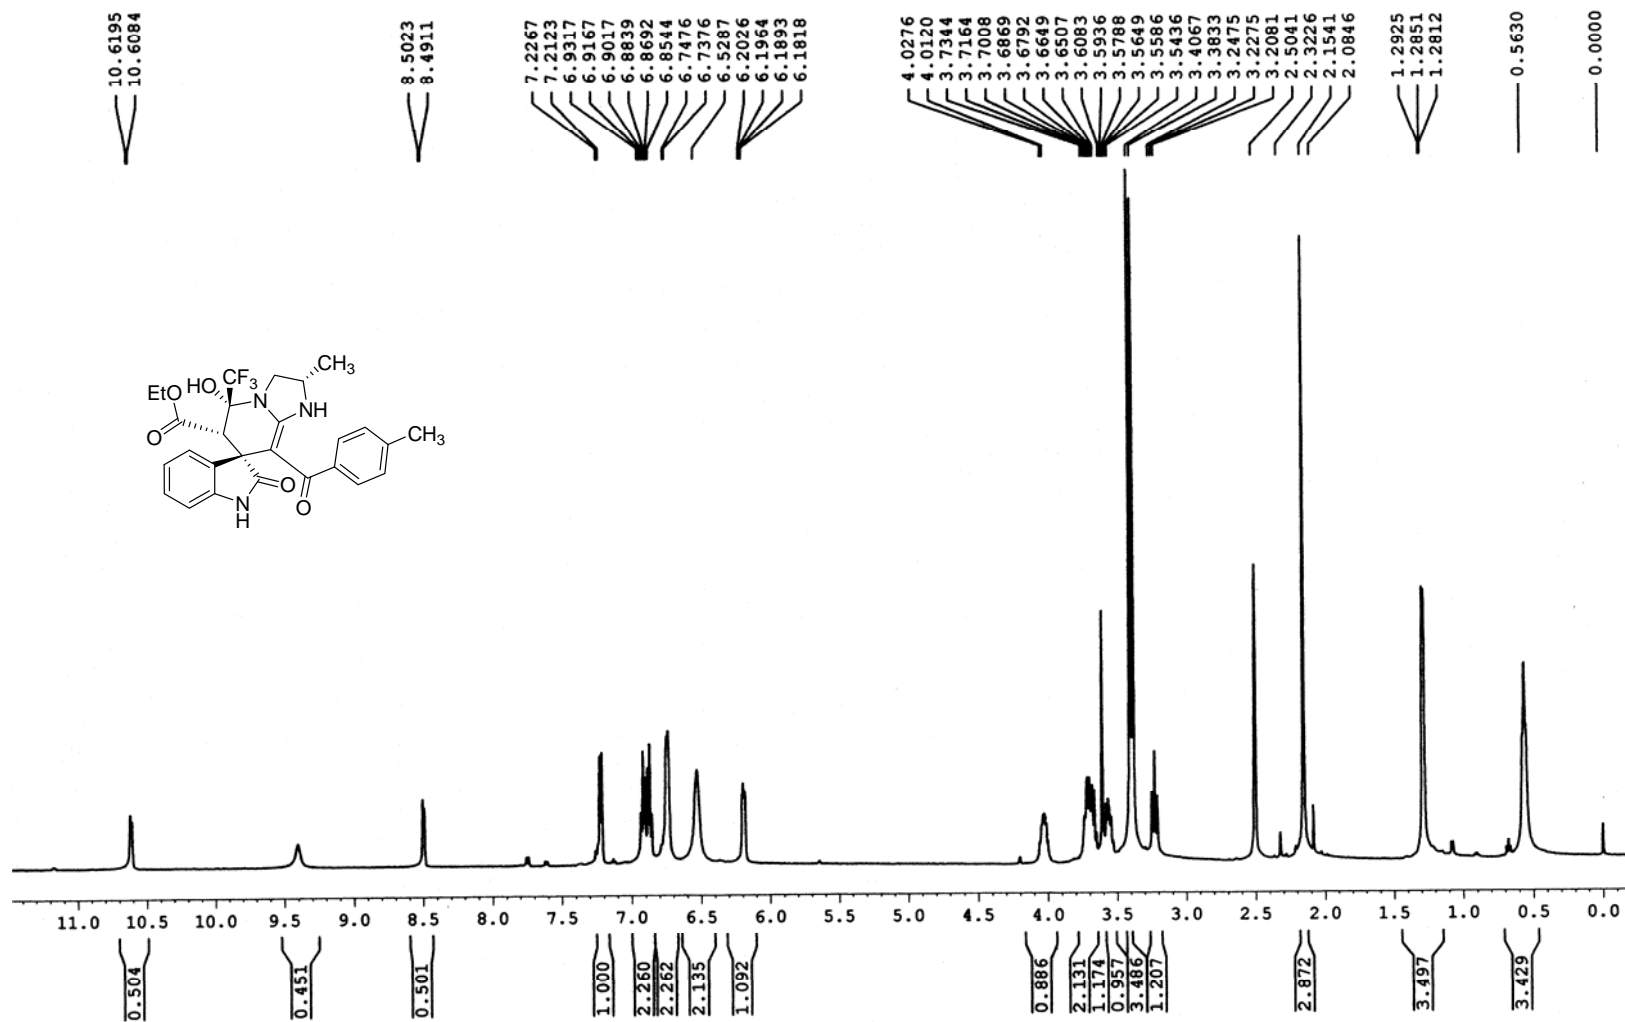

Figure 57. <sup>1</sup>H NMR (500 MHz, DMSO-*d*<sub>6</sub>) spectra of compound 5u

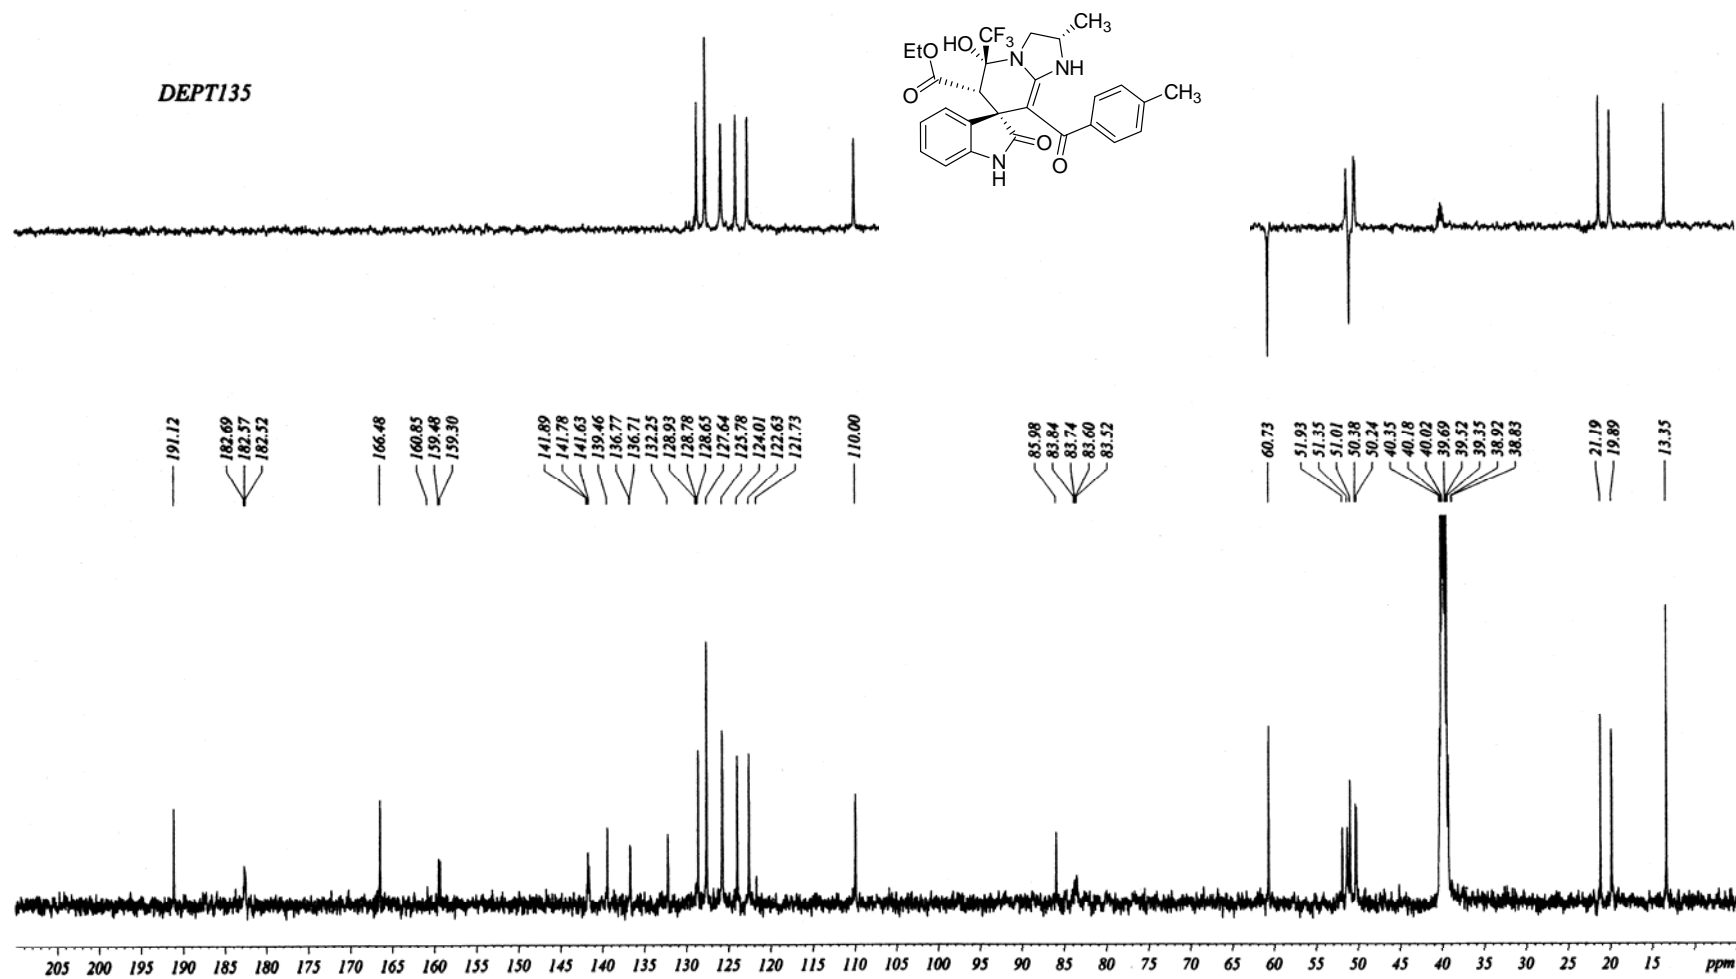

**Figure 58.** <sup>13</sup>C NMR (125 MHz, DMSO-*d*<sub>6</sub>) spectra of compound **5u**

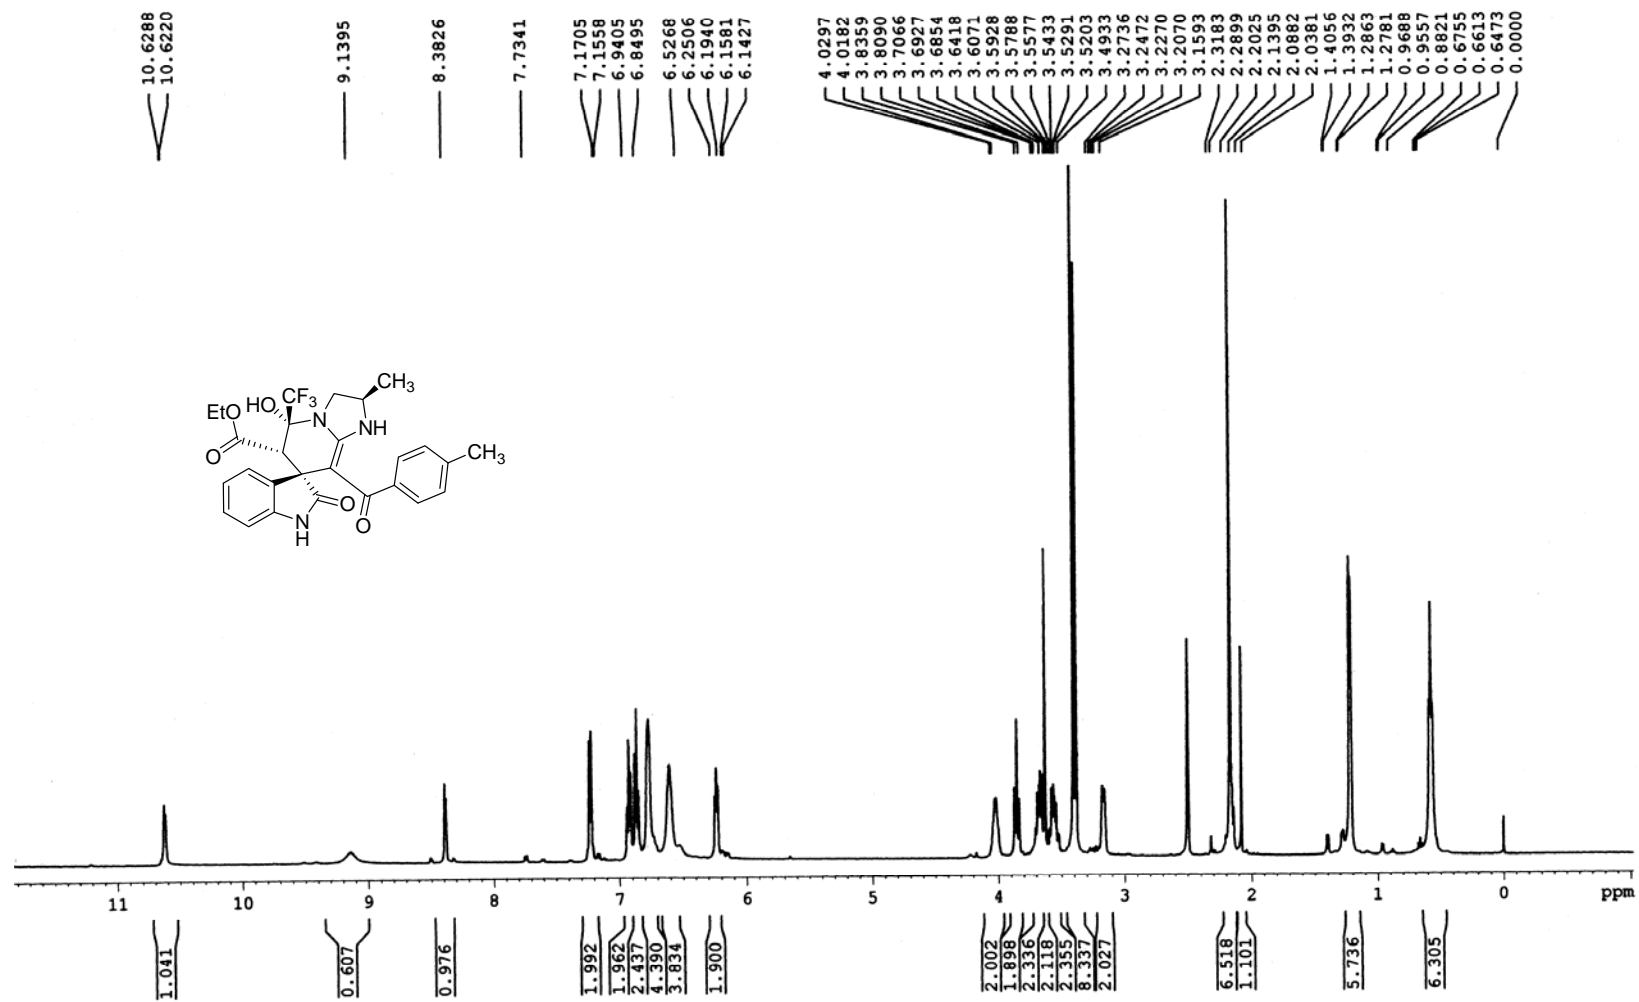

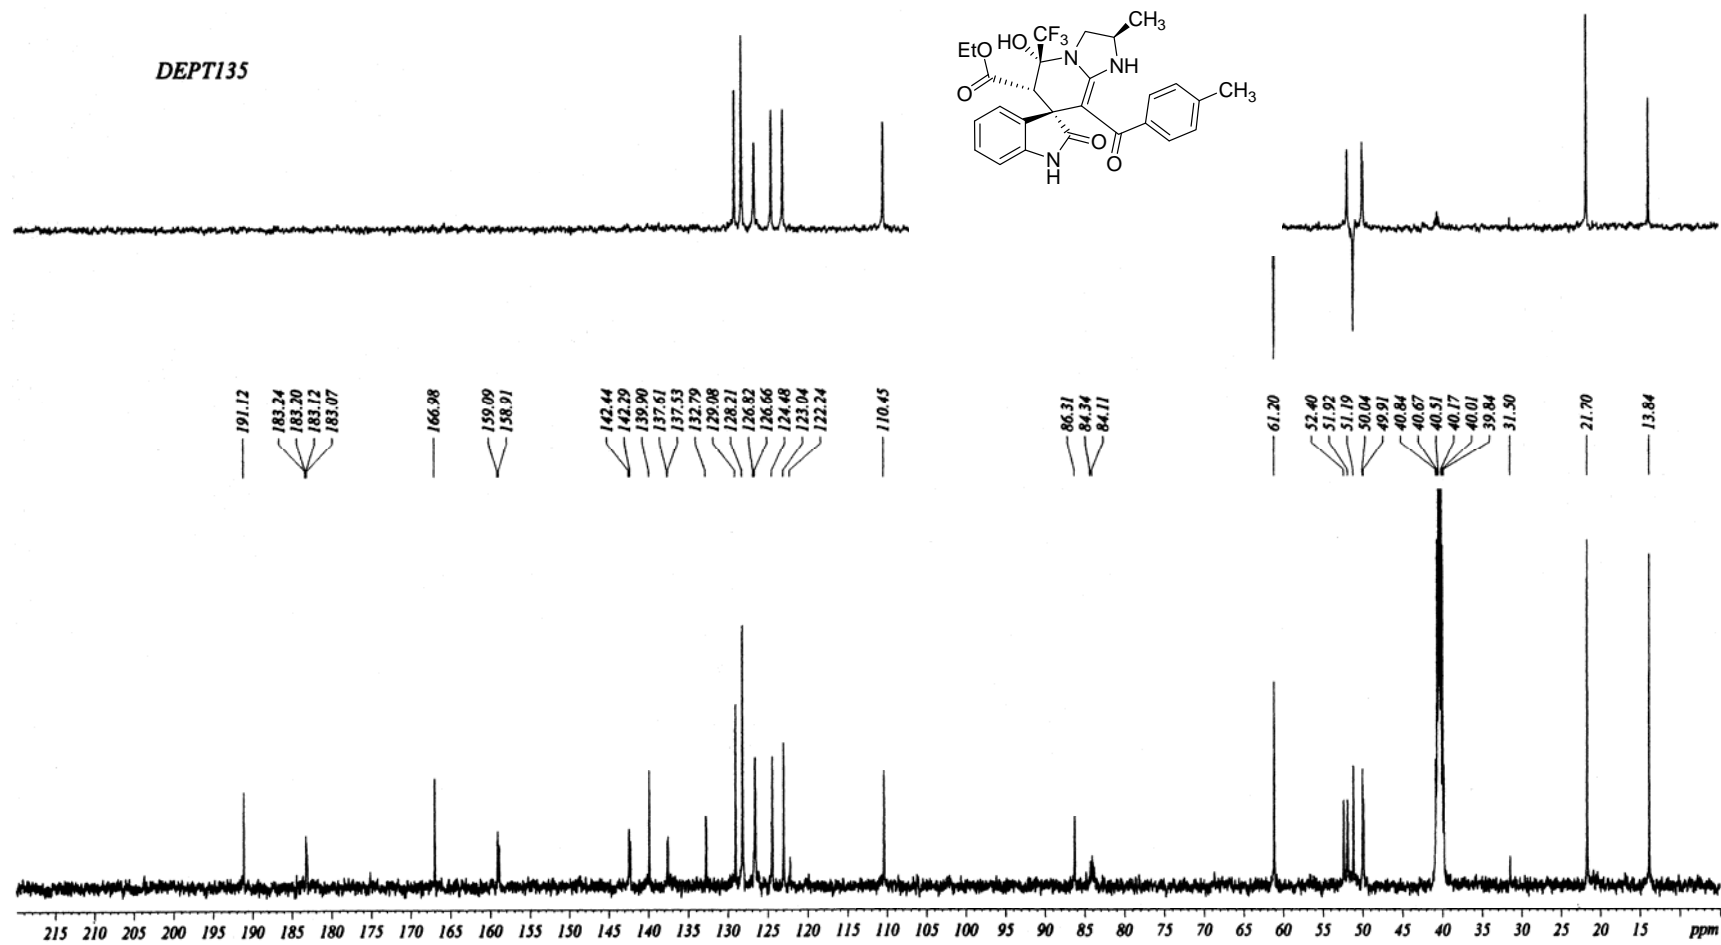

Figure 60. <sup>13</sup>C NMR (125 MHz, DMSO-d<sub>6</sub>) spectra of compound 5u'



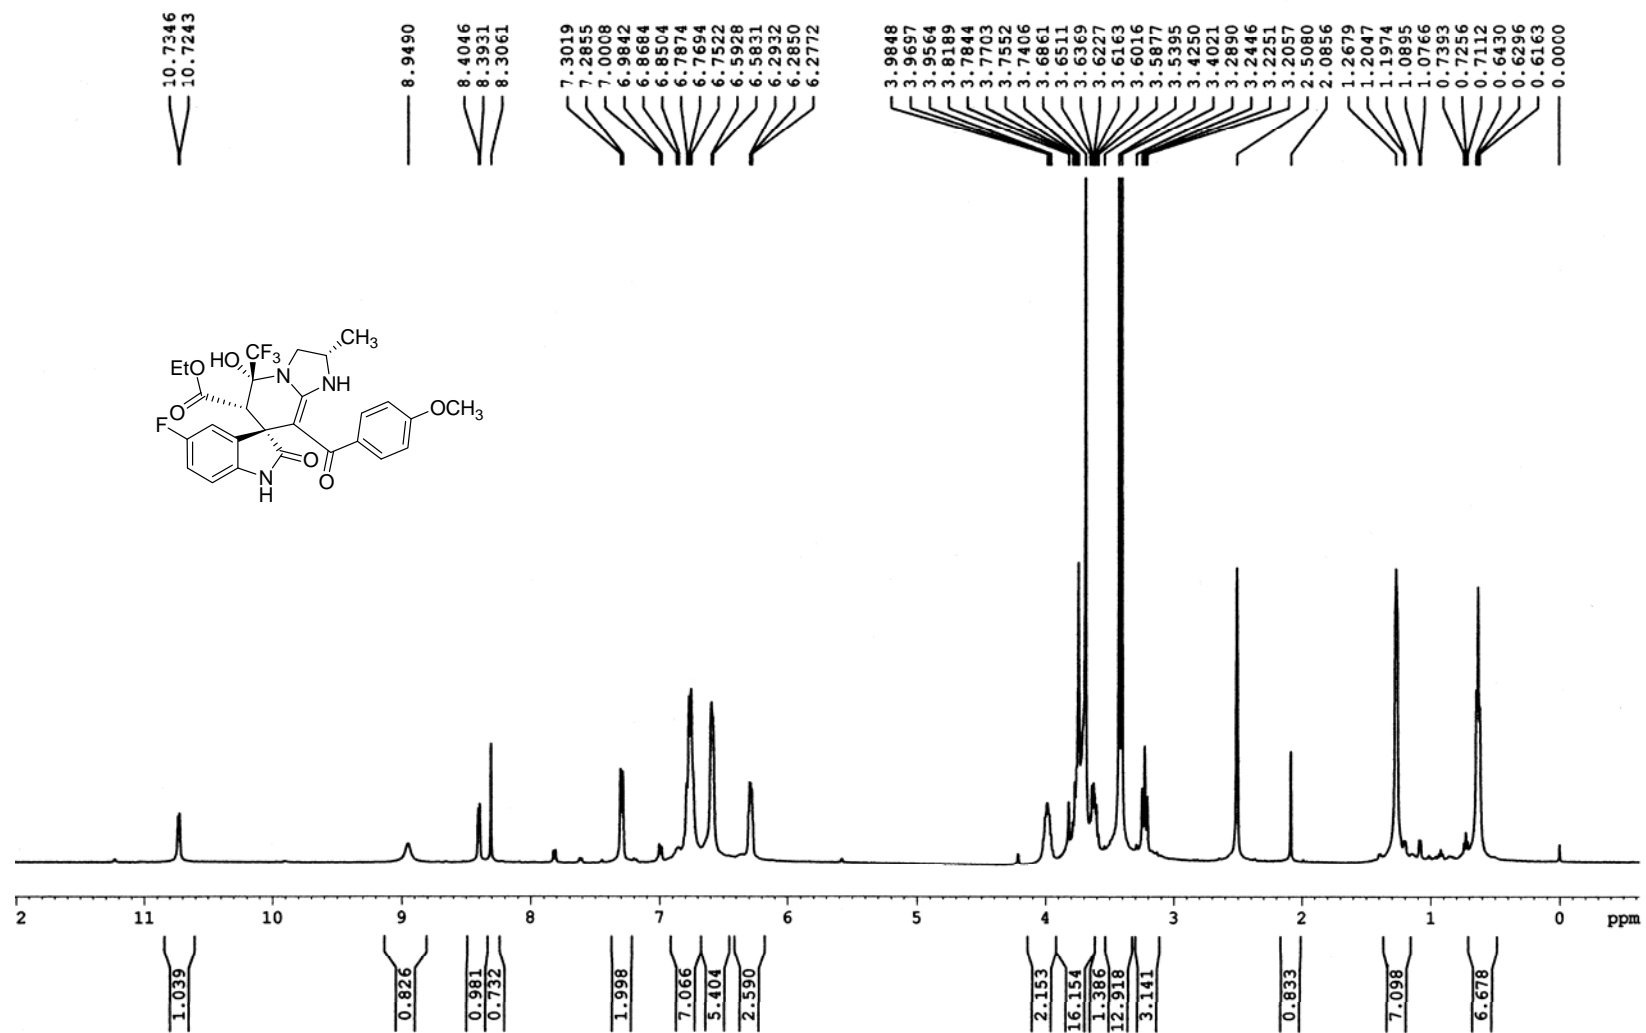

Figure 61. <sup>1</sup>H NMR (500 MHz, DMSO-*d*<sub>6</sub>) spectra of compound 5v

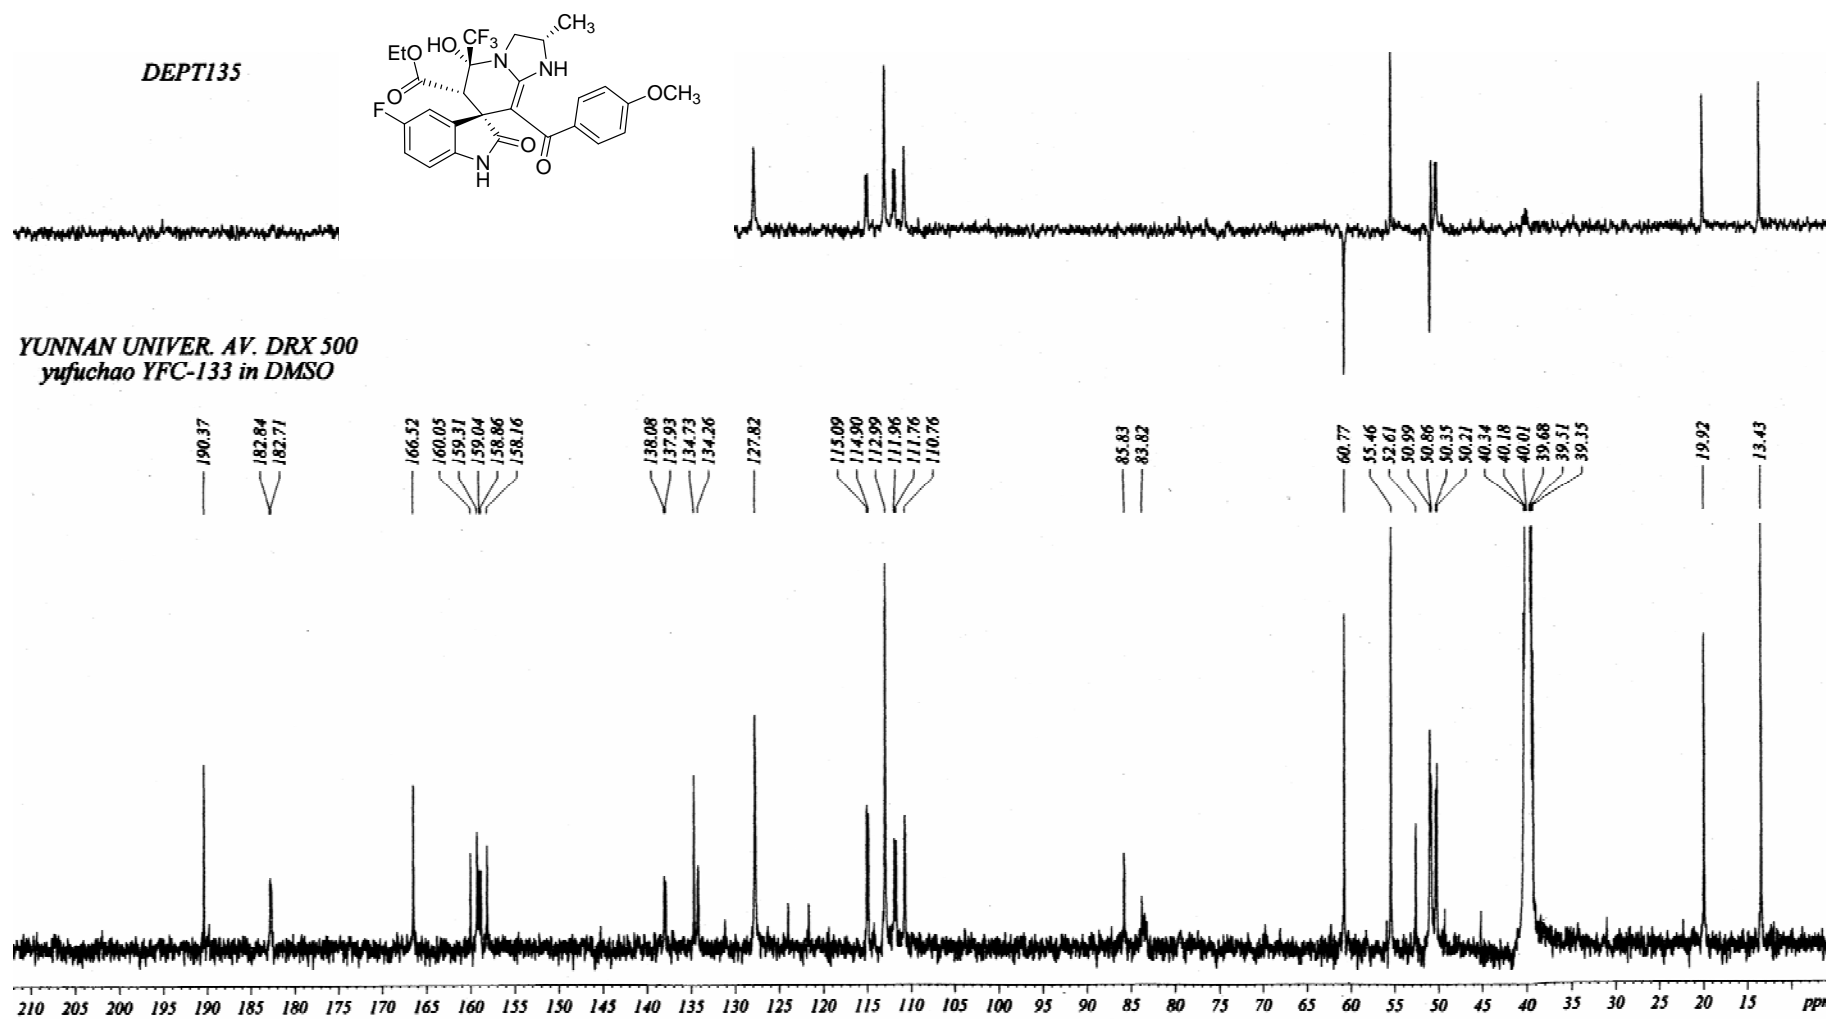

Figure 62.  $^{13}\text{C}$  NMR (125 MHz,  $\text{DMSO}-d_6$ ) spectra of compound 5v

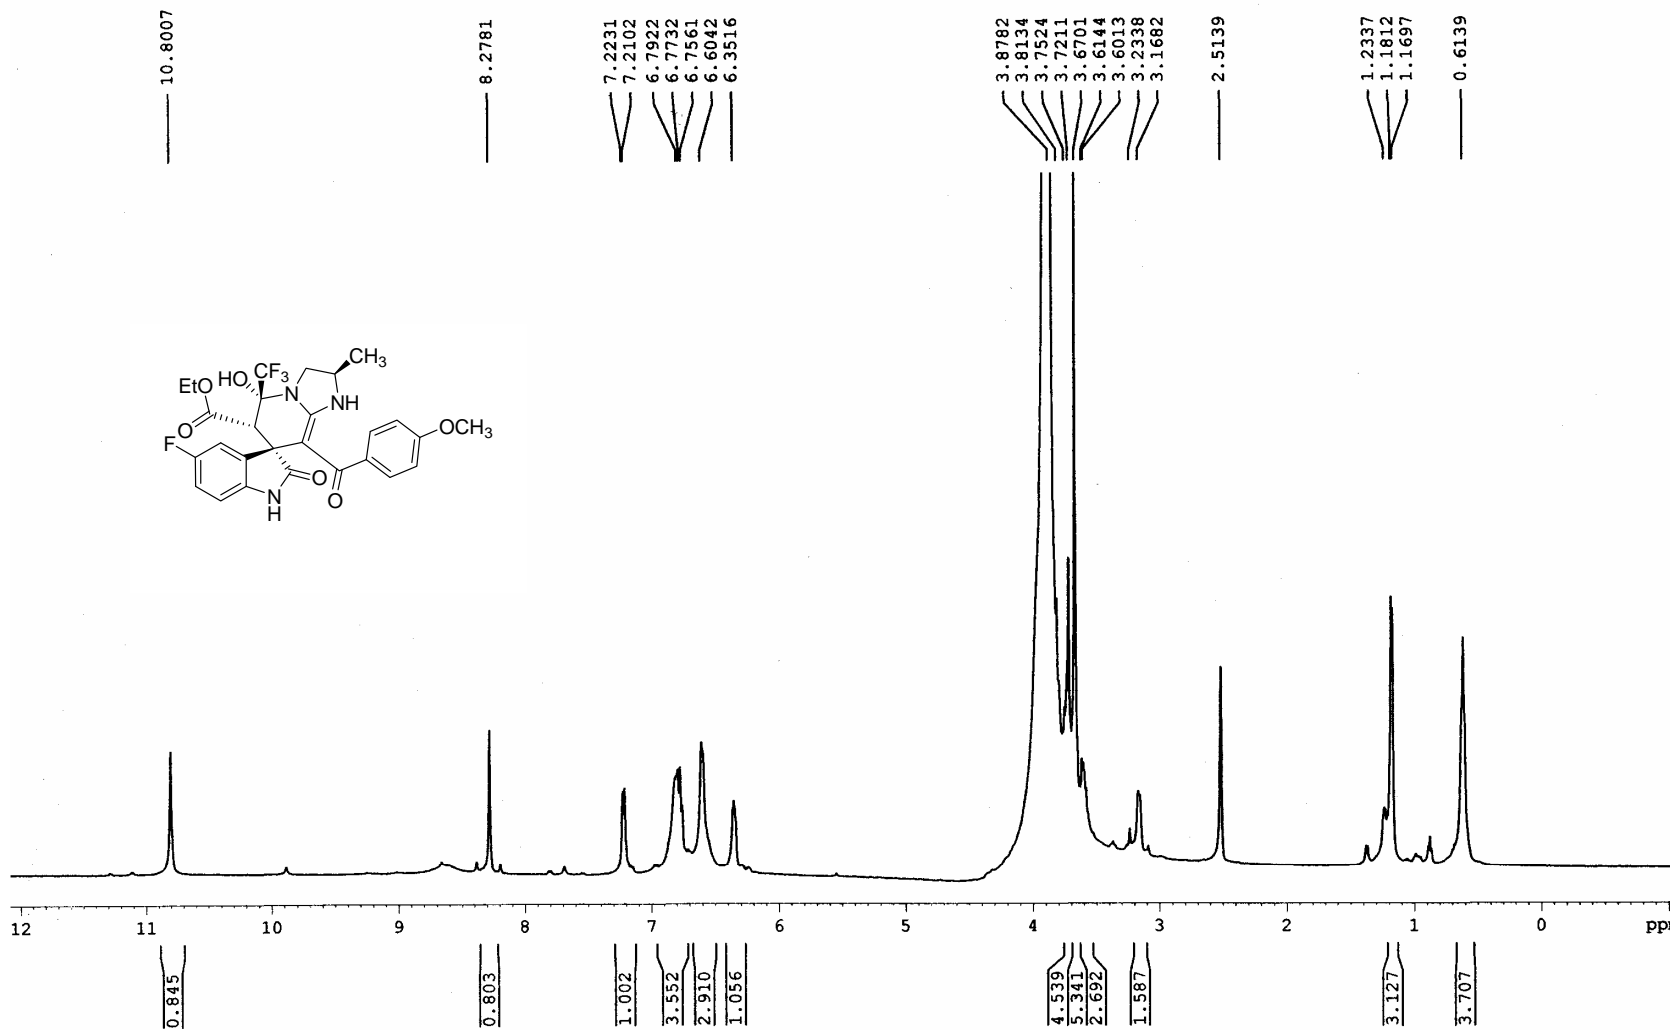

Figure 63. <sup>1</sup>H NMR (500 MHz, DMSO-d<sub>6</sub>) spectra of compound 5v'

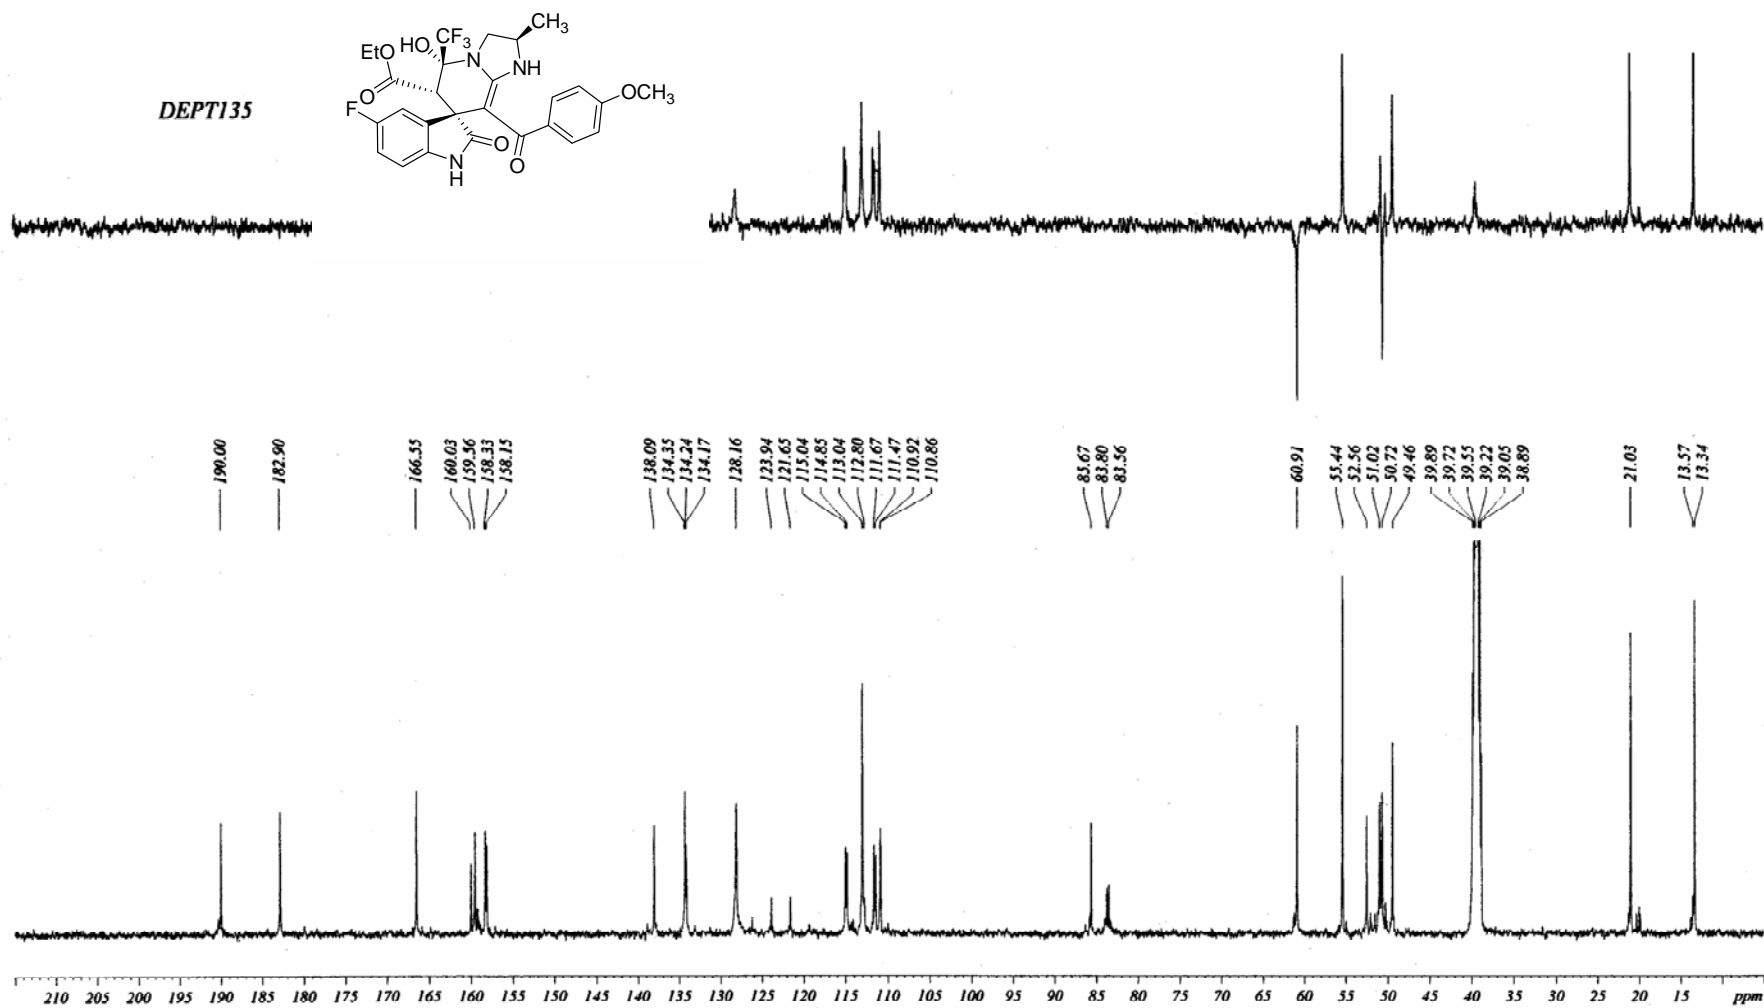

Figure 64.  $^{13}\text{C}$  NMR (125 MHz,  $\text{DMSO-}d_6$ ) spectra of compound 5v'

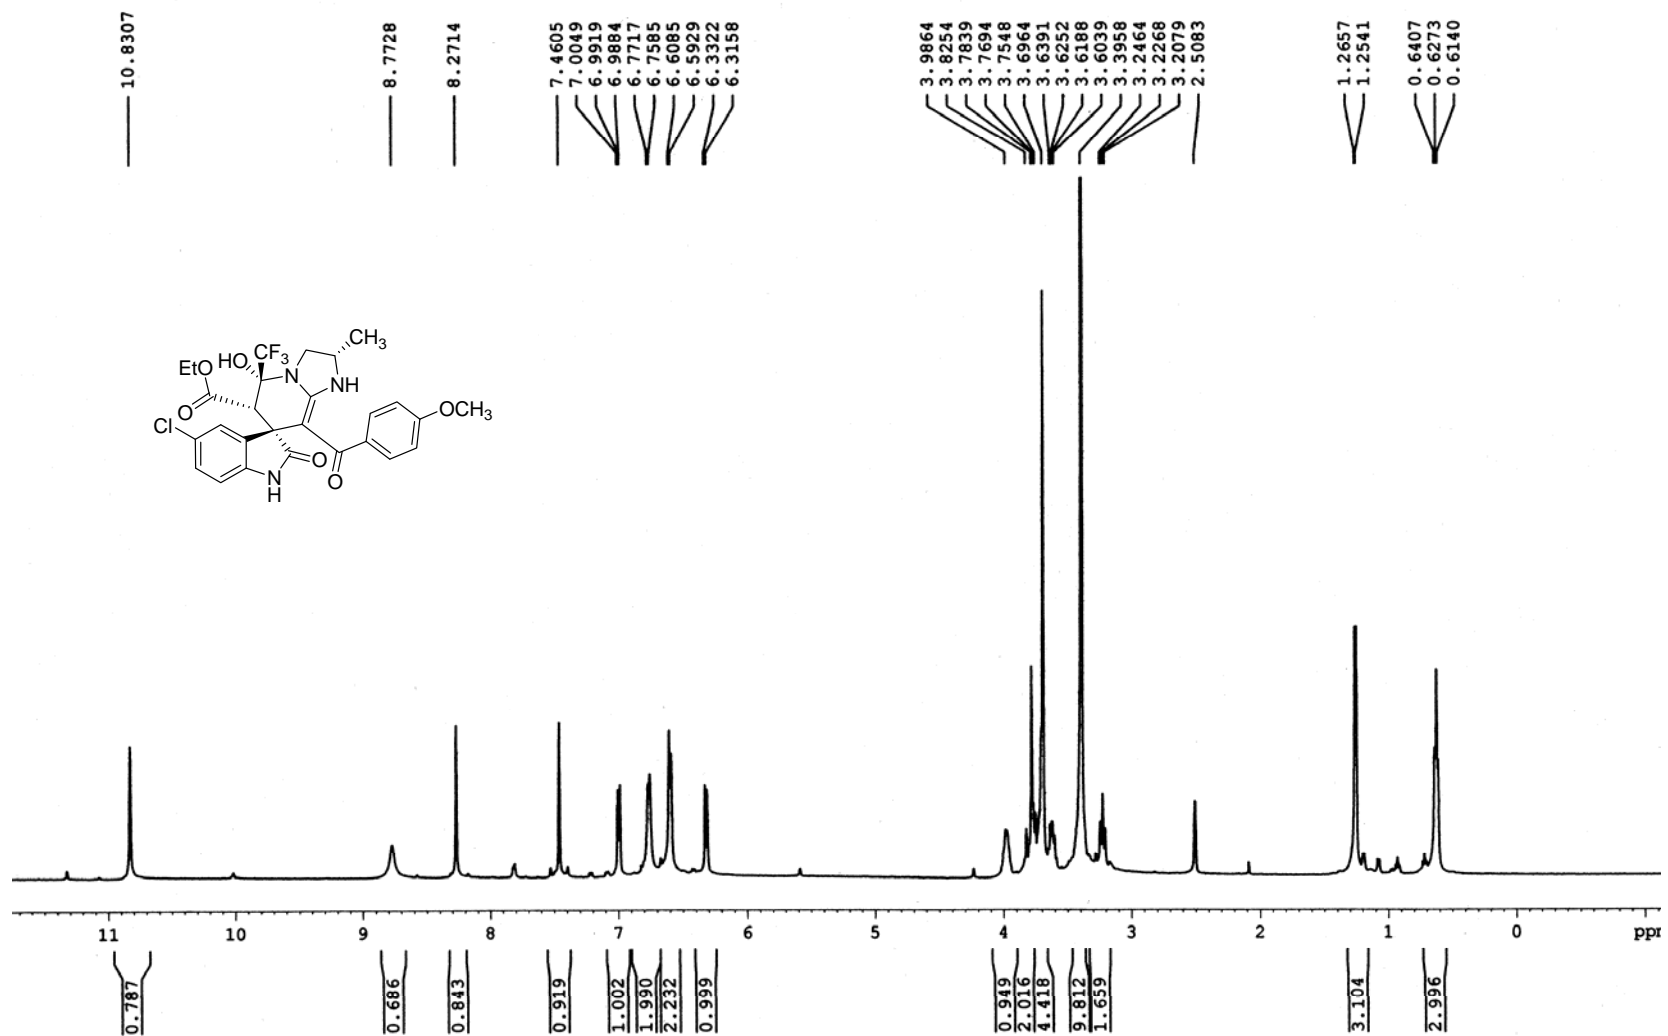

Figure 65. <sup>1</sup>H NMR (500 MHz, DMSO-*d*<sub>6</sub>) spectra of compound 5w

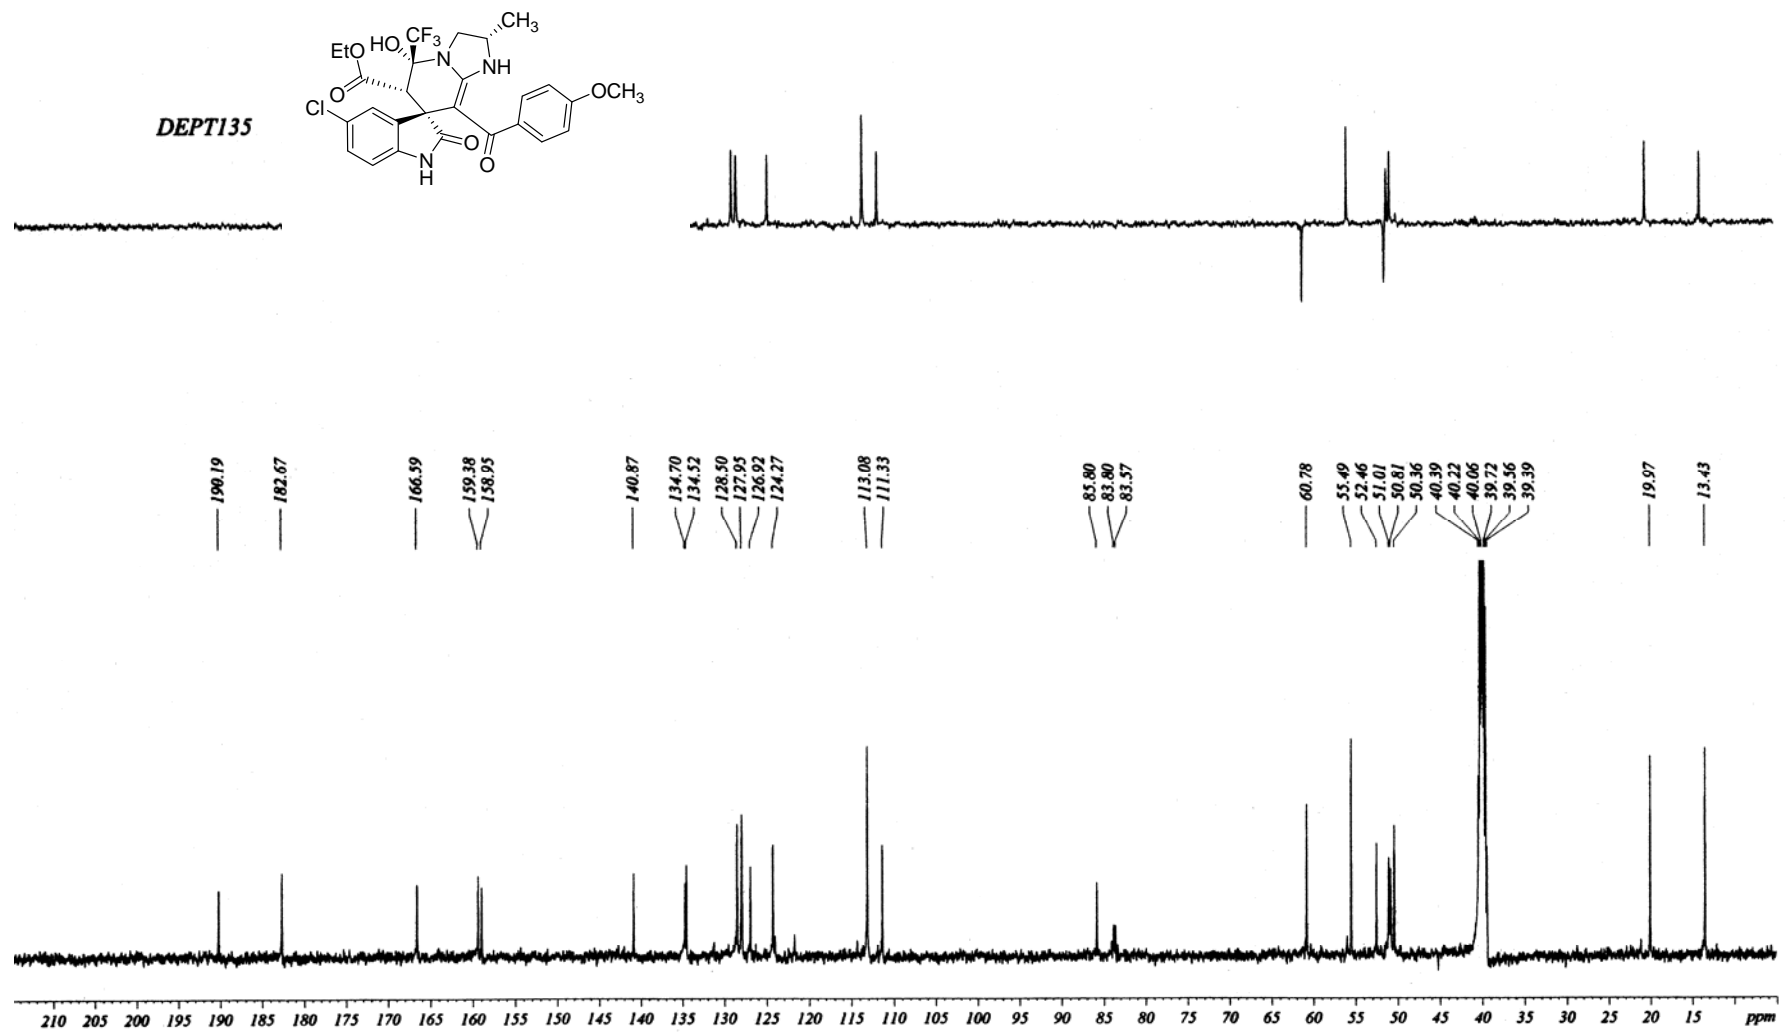

**Figure 66.**  $^{13}\text{C}$  NMR (125 MHz, DMSO- $d_6$ ) spectra of compound **5w**

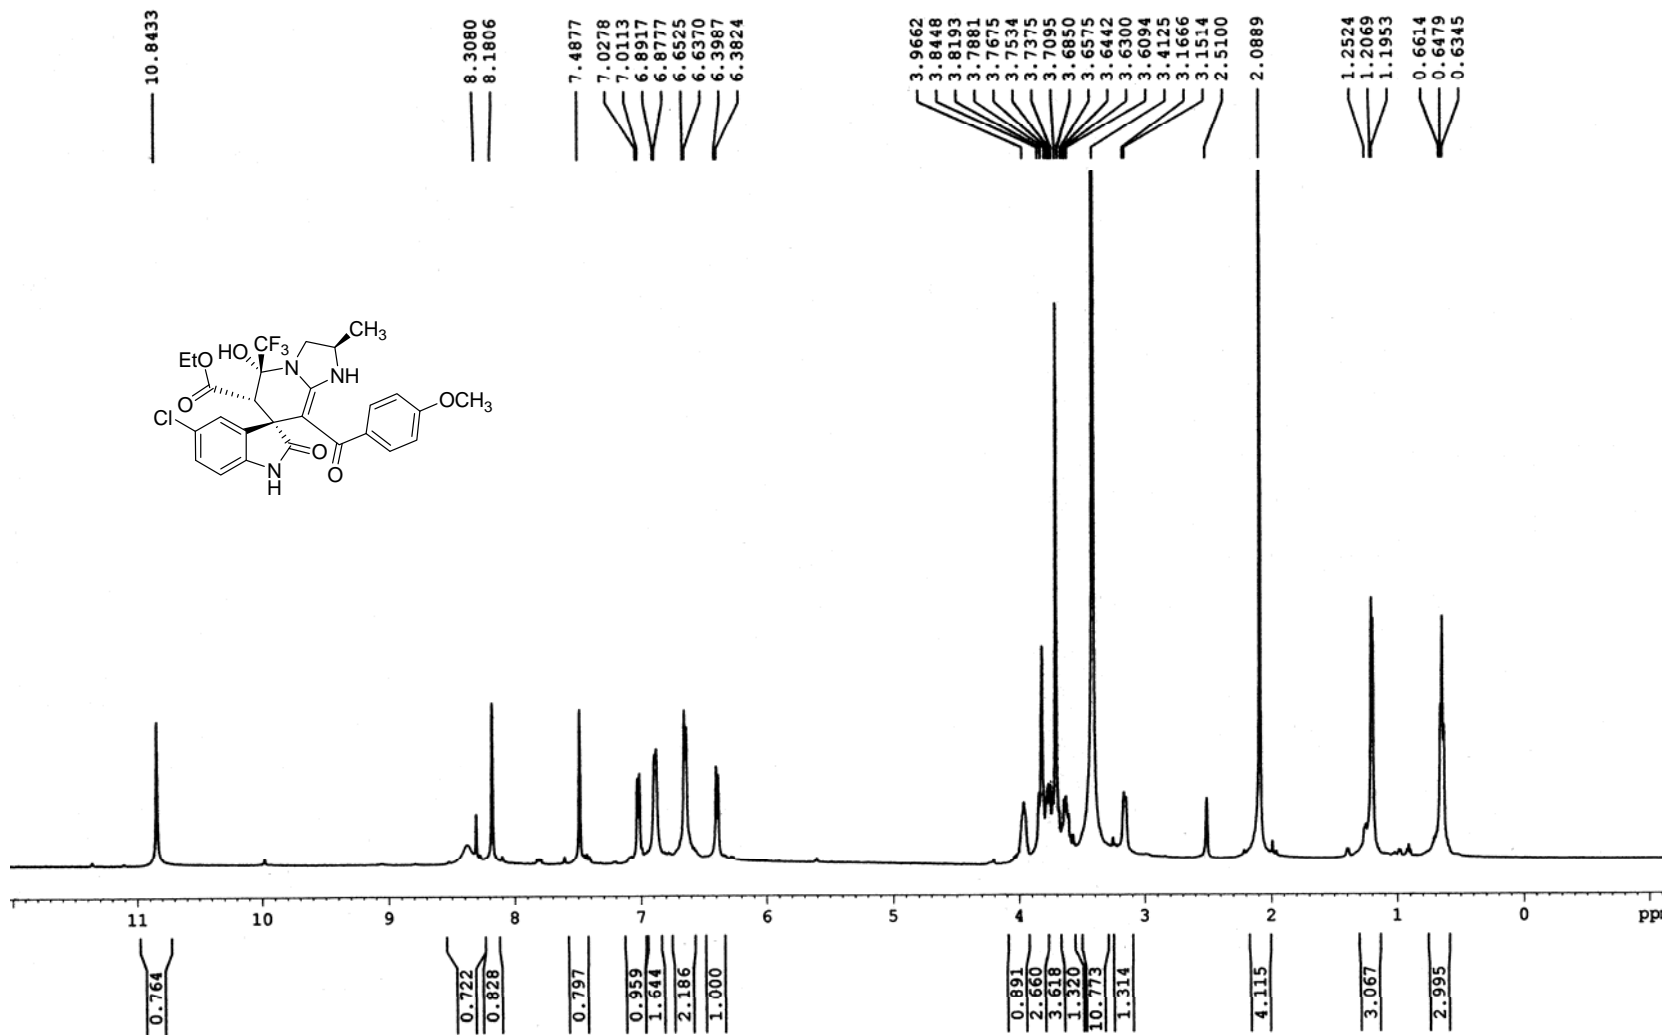

Figure 67. <sup>1</sup>H NMR (500 MHz, DMSO-*d*<sub>6</sub>) spectra of compound 5w'

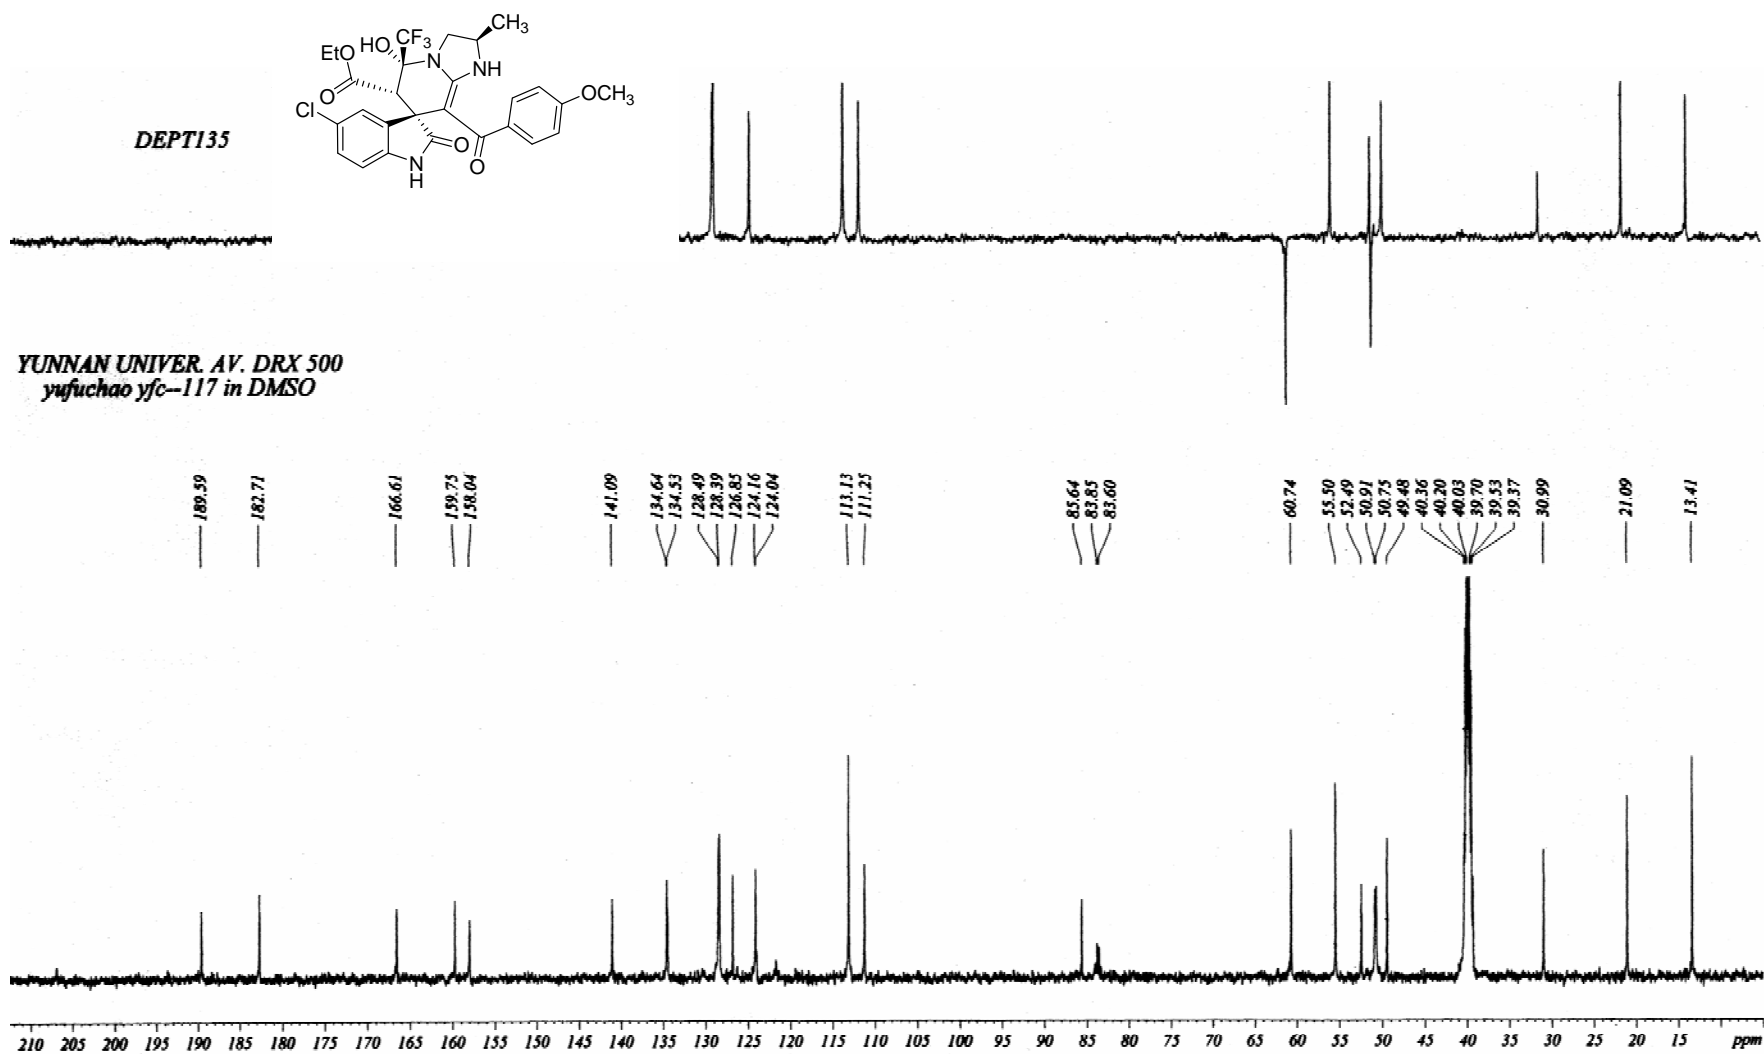

Figure 68.  $^{13}\text{C}$  NMR (125 MHz,  $\text{DMSO-}d_6$ ) spectra of compound 5w'



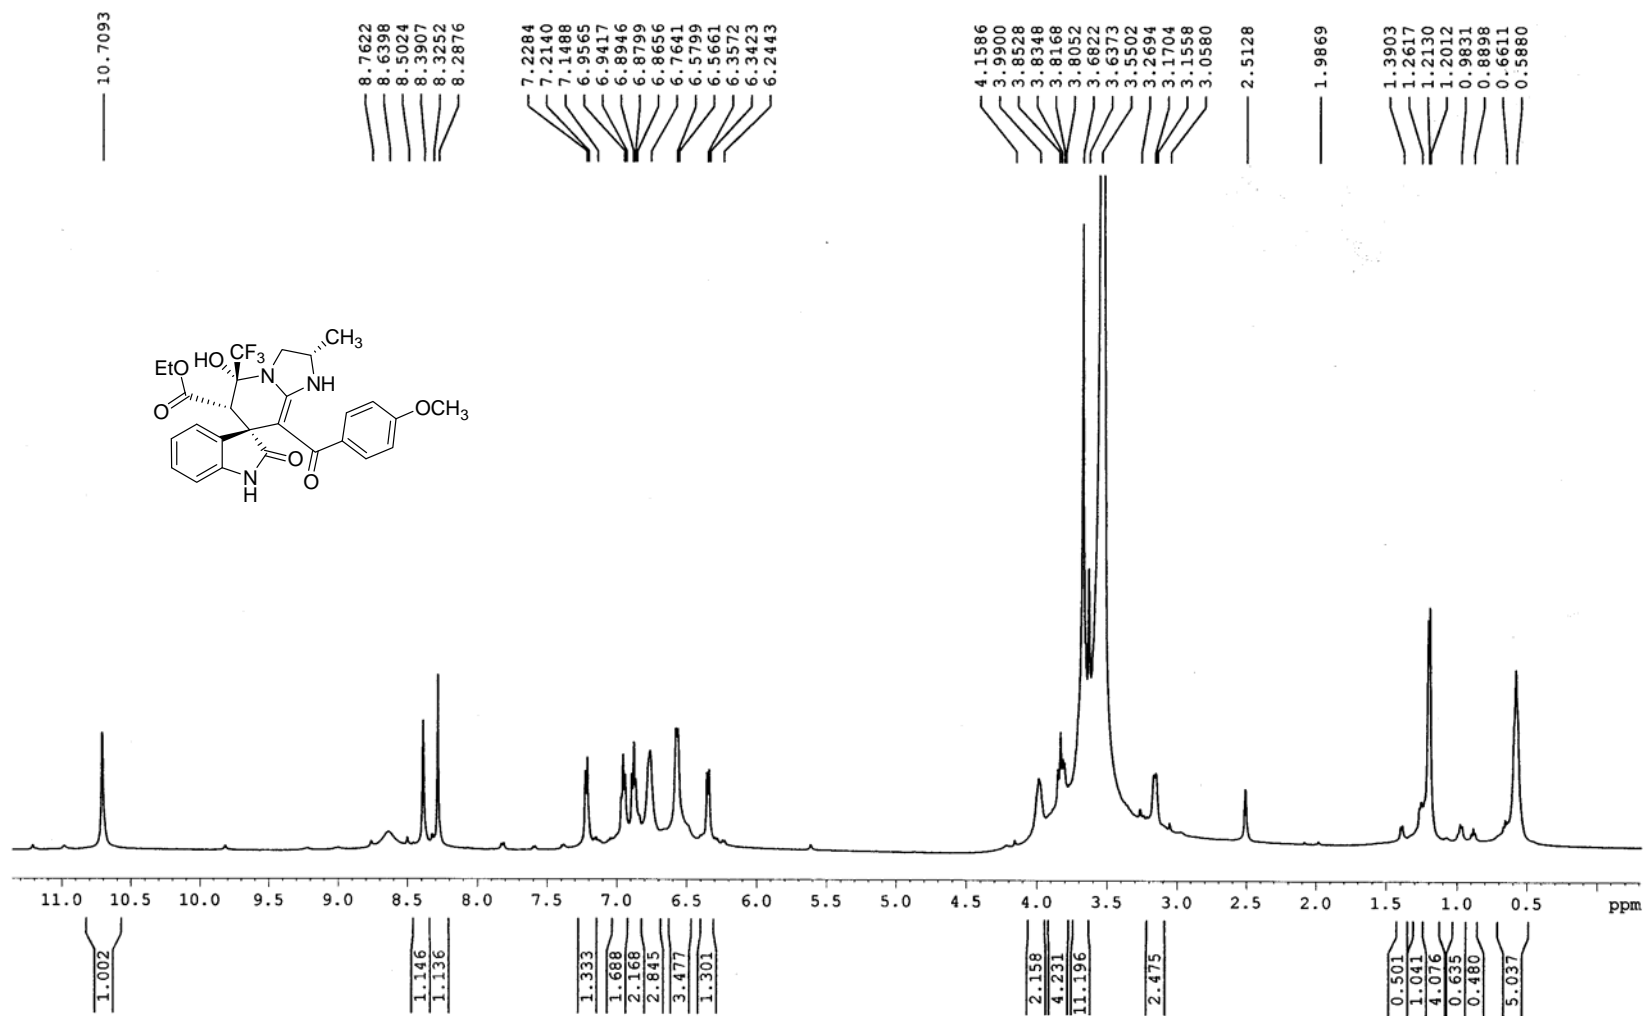

Figure 69. <sup>1</sup>H NMR (500 MHz, DMSO-*d*<sub>6</sub>) spectra of compound 5x

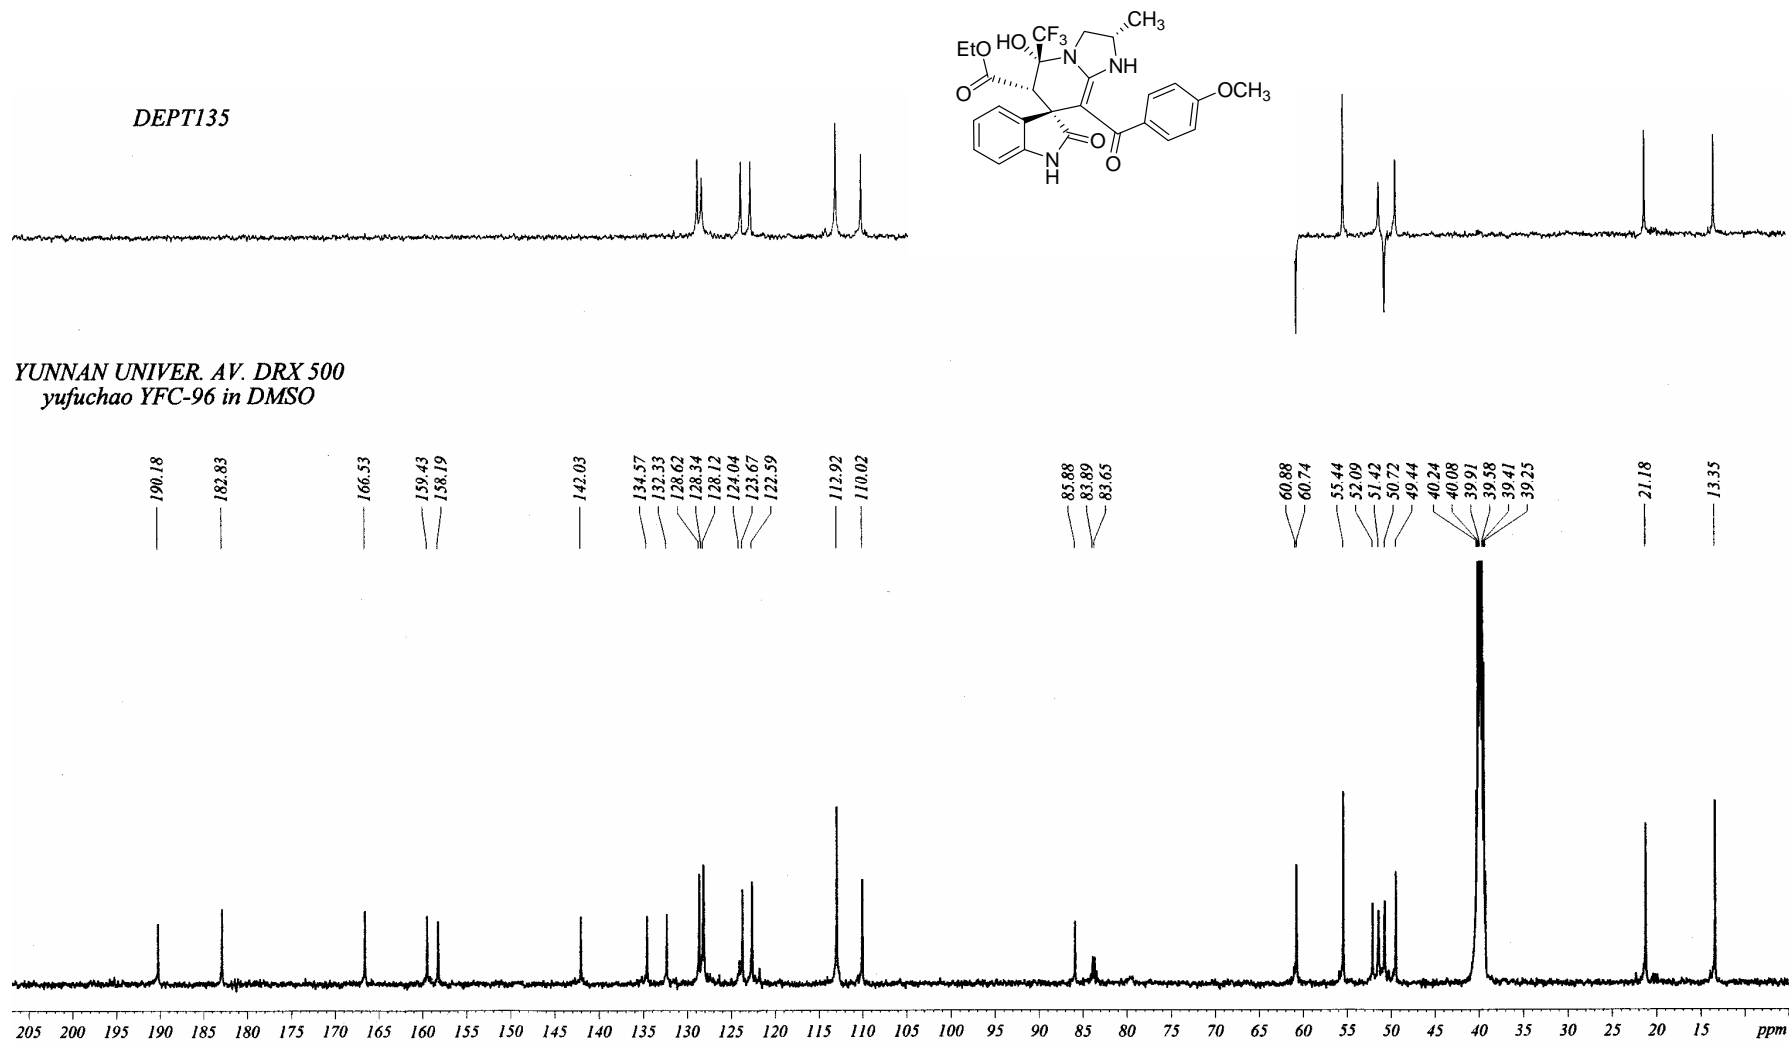

Figure 70.  $^{13}\text{C}$  NMR (125 MHz,  $\text{DMSO-}d_6$ ) spectra of compound 5x

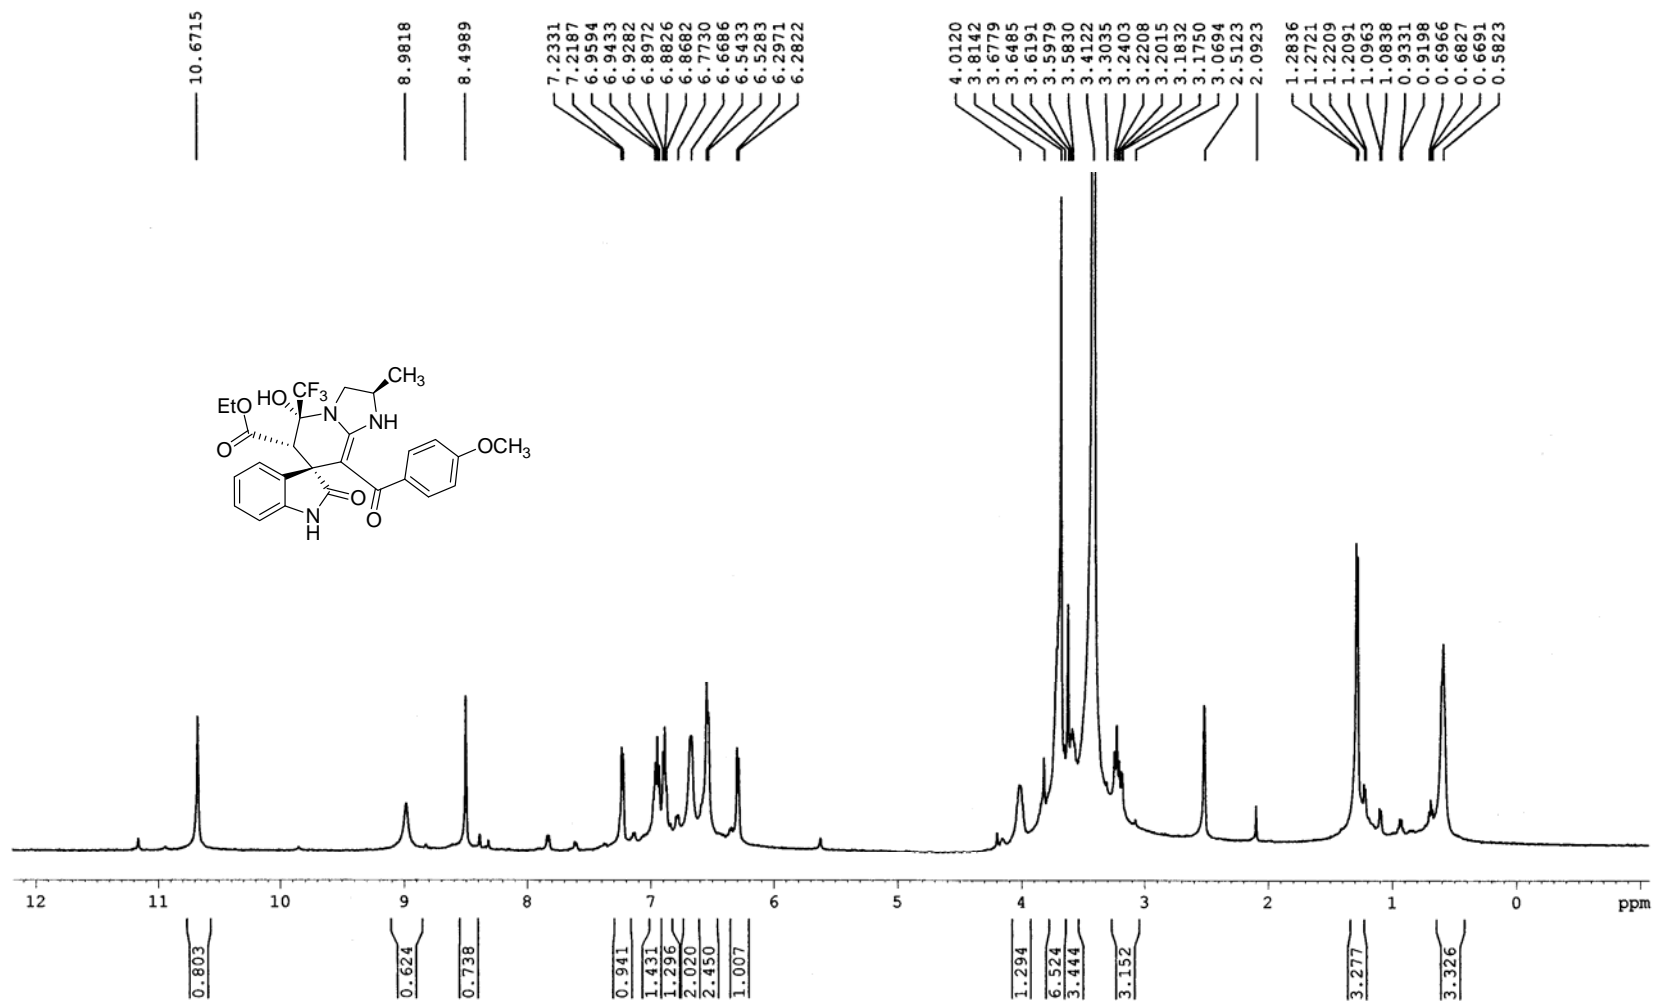

Figure 71.  $^1\text{H}$  NMR (500 MHz,  $\text{DMSO-}d_6$ ) spectra of compound 5x'

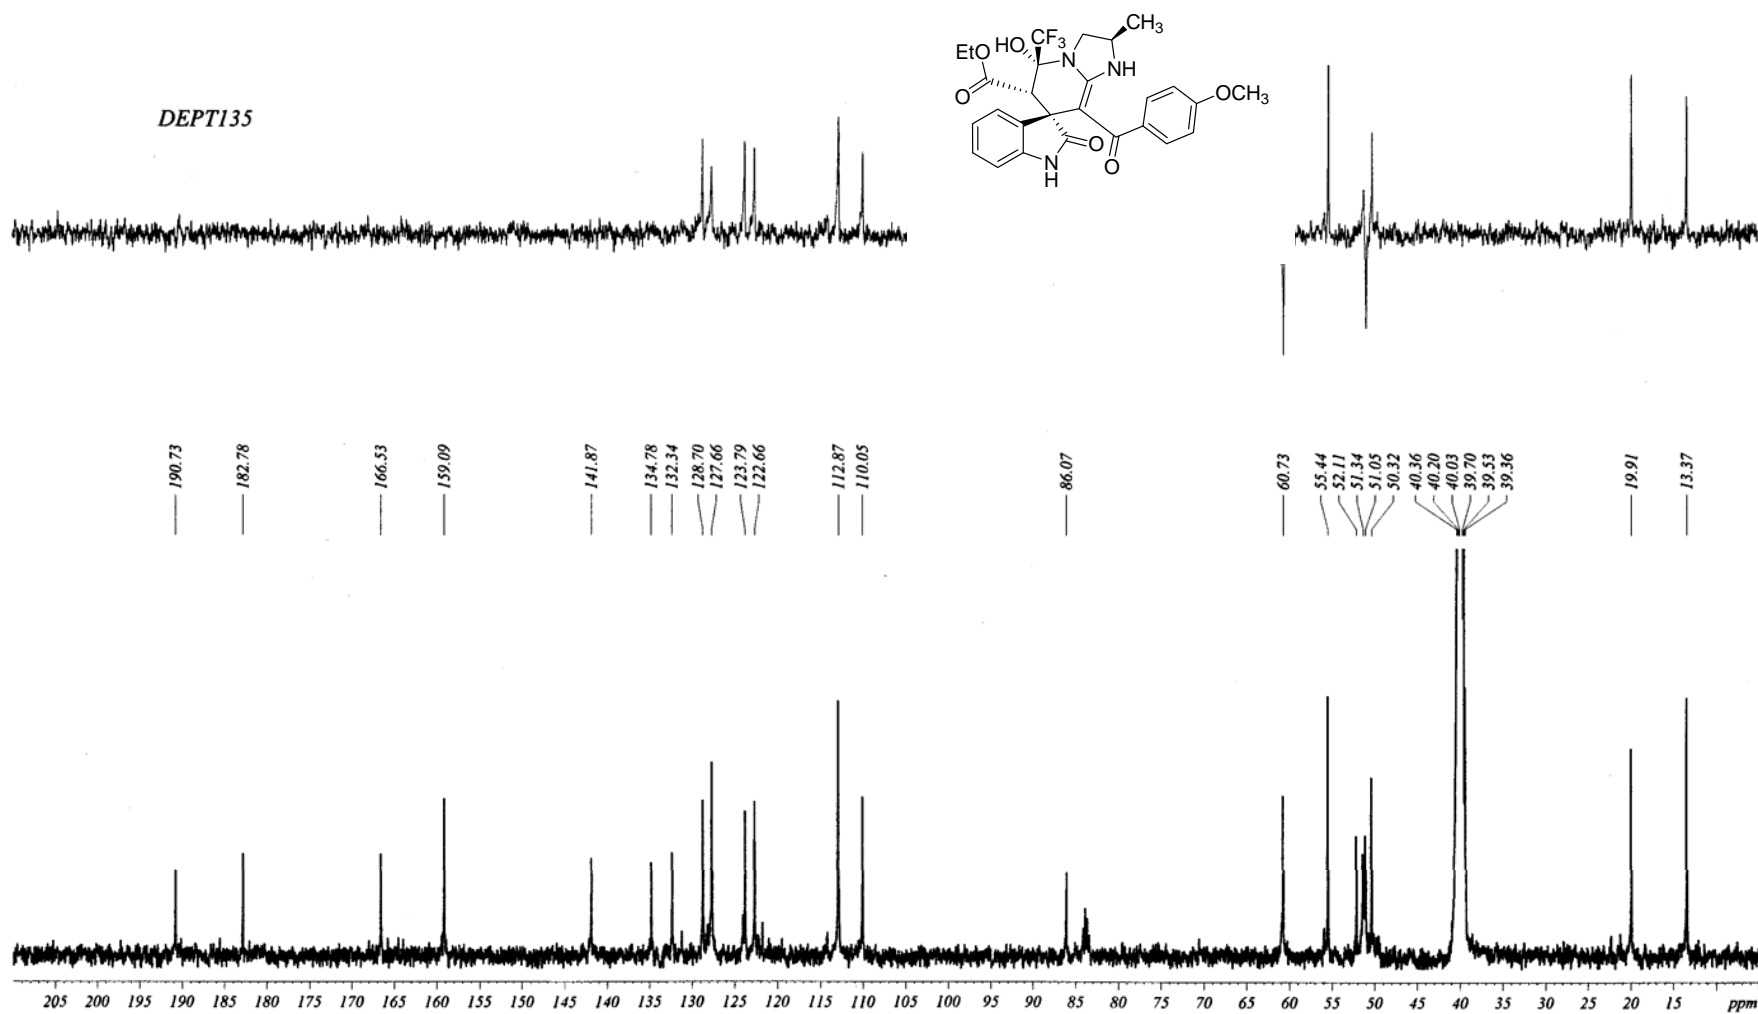

Figure 72. <sup>13</sup>C NMR (125 MHz, DMSO-*d*<sub>6</sub>) spectra of compound 5x'

## References and Notes

1. (a) Huang, Z.-T.; Wang, M.-X. *Synthesis* **1992**, 12, 1273–1276. (b) Li, Z.-J.; Charles, D. *Synth. Commun.* **2001**, 31, 527–533.
2. CCDC 890741 contain the supplementary crystallographic data for compound **5r**. CCDC 890742 contain the supplementary crystallographic data for compound **5r'**. These data can be obtained free of charge from The Cambridge Crystallographic Data Center via [www.ccdc.cam.ac.uk/data\\_request/cif](http://www.ccdc.cam.ac.uk/data_request/cif).
